# Supplementary material for: Age-invariant genes: multi-tissue identification and characterization of murine reference genes
Source: publisher site journal article supplement (doi:10.18632/aging.206192), 2025-01-27
Supplement: Supplementary file [file aging-v17i1-206192-supplementary-material-SD3.pdf]

## SUPPLEMENTARY TABLES

**Supplementary Table 13. Metadata information for the samples used in qPCR analysis.**

| Name        | Sex          | Line     | Tissue    | Birth date  | Death/Exit date | Age (weeks) |
|-------------|--------------|----------|-----------|-------------|-----------------|-------------|
| AgedB6-0278 | Female       | C57BL/6J | Heart     | 31-12-2017  | 24-08-2018      | 33          |
| AgedB6-0279 | Female       | C57BL/6J | Heart     | 31-12-2017  | 24-08-2018      | 33          |
| AgedB6-0283 | Male         | C57BL/6J | Heart     | 31-12-2017  | 24-08-2018      | 33          |
| AgedB6-0284 | Male         | C57BL/6J | Heart     | 31-12-2017  | 24-08-2018      | 33          |
| AgedB6-0266 | Female       | C57BL/6J | Heart     | 09-12-2017  | 24-08-2018      | 36          |
| AgedB6-0270 | Male         | C57BL/6J | Heart     | 09-12-2017  | 24-08-2018      | 36          |
| AgedB6-0215 | Male         | C57BL/6J | Heart     | 27-01-2017  | 24-08-2018      | 82          |
| AgedB6-0216 | Male         | C57BL/6J | Heart     | 27-01-2017  | 24-08-2018      | 82          |
| AgedB6-0217 | Male         | C57BL/6J | Heart     | 27-01-2017  | 24-08-2018      | 82          |
| AgedB6-0206 | Female       | C57BL/6J | Heart     | 27-01-2017  | 24-08-2018      | 82          |
| AgedB6-0207 | Female       | C57BL/6J | Heart     | 27-01-2017  | 24-08-2018      | 82          |
| AgedB6-0208 | Female       | C57BL/6J | Heart     | 27-01-2017  | 24-08-2018      | 82          |
| Type        | Harvest Date | Line     | Status    | Source      | Age (weeks)     | Sex         |
| Liver       | 24-08-2018   | C57BL/6J | Available | AgedB6-0206 | 82              | F           |
| Liver       | 24-08-2018   | C57BL/6J | Available | AgedB6-0207 | 82              | F           |
| Liver       | 24-08-2018   | C57BL/6J | Available | AgedB6-0208 | 82              | F           |
| Liver       | 24-08-2018   | C57BL/6J | Available | AgedB6-0215 | 82              | M           |
| Liver       | 24-08-2018   | C57BL/6J | Available | AgedB6-0216 | 82              | M           |
| Liver       | 24-08-2018   | C57BL/6J | Available | AgedB6-0217 | 82              | M           |
| Liver       | 24-08-2018   | C57BL/6J | Available | AgedB6-0304 | 35              | F           |
| Liver       | 24-08-2018   | C57BL/6J | Available | AgedB6-0278 | 33              | F           |
| Liver       | 24-08-2018   | C57BL/6J | Available | AgedB6-0279 | 33              | F           |
| Liver       | 24-08-2018   | C57BL/6J | Available | AgedB6-0283 | 33              | M           |
| Liver       | 24-08-2018   | C57BL/6J | Available | AgedB6-0303 | 35              | M           |
| Liver       | 24-08-2018   | C57BL/6J | Available | AgedB6-0303 | 35              | M           |

**Supplementary Table 16. Ranked average log<sub>10</sub> *p*-value for Aging Hallmark associated GO terms.**

| Hallmark        | Average log <sub>10</sub> ( <i>p</i> -val) |
|-----------------|--------------------------------------------|
| EA              | -0.213781602                               |
| CS              | -0.411091613                               |
| AIC             | -0.41500978                                |
| SCE             | -0.645708596                               |
| MD              | -1.387717035                               |
| GI              | -1.475028755                               |
| TA              | -1.758950891                               |
| DNS             | -2.573837215                               |
| LOP             | -19.6887982                                |
| Aging-invariant | -302.2073638                               |
