# Supplementary material for: Age-invariant genes: multi-tissue identification and characterization of murine reference genes
Source: Aging (Albany NY). 2025 Jan 27;17(1):170–202. doi: 10.18632/aging.206192 (PMC11810070; doi:10.18632/aging.206192)
Supplement: Supplementary Tables 1-12, 14, 15 and 17 [file aging-17-206192-s002.xls]

## Sheet: Sup. Table Appendix
	Supplementary Table 1. Gene counts and percentage per filter in age-invariant gene identification strategy.
	Supplementary Table 2. Gene %CV, slope with age, and correlation with age for each tissue.
	Supplementary Table 3. Genes that passed filter 1 per tissue.
	Supplementary Table 4. Genes that passed filter 2 per tissue.
	Supplementary Table 5. Genes that passed filter 3 per tissue.
	Supplementary Table 6. Genes that passed filter 4 per tissue.
	Supplementary Table 7. Genes that passed filter 5 per tissue.
	Supplementary Table 8. Genes that passed filter 6 per tissue.
	Supplementary Table 9. Final Tissue-Specific Age invariant status after validation.
	Supplementary Table 10. Discovery dataset samples that were removed during selection process.
	Supplementary Table 11. Discovery dataset samples that passed selection process.
	Supplementary Table 12. Dataset, tissue and life-stage breakdown of validation dataset.
	Supplementary Table 14. Cycle Threshold (Ct) values in heart tissues.
	Supplementary Table 15. Cycle Threshold (Ct) values in liver tissues.
	Supplementary Table 17. Counts and percentages of CGI distributions in tissue lists by filter. Odds Ratio and statistical tests comparing to dataset baseline.

## Sheet: 1. Filter Genecounts
Supplementary Table 1. Gene counts and percentage per filter in age-invariant gene identification strategy.
	counts1	percent1	counts2	percent2	counts3	percent3	counts4	percent4	counts5	percent5	counts6	percent6	counts7	percent7	Percent Validated
BAT	12725	39.0134	12113	37.1371	10281	31.5204	5312	16.286	5297	16.24	4760	14.5936	4266	13.0791	89.6218
Bone	20416	62.5931	15963	48.9407	7525	23.0708	3573	10.9544	2728	8.36374	2721	8.34228	0	0
Brain	17908	54.9039	17197	52.724	14147	43.3731	8016	24.5761	8011	24.5608	7193	22.0529	6593	20.2134	91.6586
GAT	15742	48.2632	14393	44.1273	12350	37.8637	7033	21.5624	7030	21.5532	4420	13.5512	0	0
Heart	15990	49.0235	14379	44.0844	12546	38.4646	6939	21.2742	6929	21.2435	6493	19.9068	4835	14.8236	74.4648
Intestine	15219	46.6597	14384	44.0997	11135	34.1386	6111	18.7356	6103	18.7111	5155	15.8046	4120	12.6314	79.9224
Kidney	15972	48.9683	14984	45.9392	13092	40.1386	7112	21.8046	7103	21.777	6417	19.6738	5582	17.1138	86.9877
Liver	13183	40.4176	12296	37.6981	10601	32.5015	5412	16.5926	5396	16.5435	4555	13.9651	2432	7.45623	53.3919
Lung	19891	60.9835	17613	53.9994	14336	43.9525	8542	26.1888	8492	26.0355	7321	22.4454	4672	14.3238	63.8164
Marrow	19289	59.1379	15992	49.0296	13655	41.8647	7862	24.104	7730	23.6993	7047	21.6053	0	0
MAT	18287	56.0659	15331	47.0031	12217	37.4559	7601	23.3038	7579	23.2363	5456	16.7275	0	0
Muscle	12336	37.8208	11795	36.1621	10232	31.3701	5065	15.5287	5058	15.5073	4302	13.1894	3068	9.40614	71.3157
Pancreas	10287	31.5388	8891	27.2588	6787	20.8082	3313	10.1573	2134	6.5426	2071	6.34945	0	0
SCAT	18851	57.795	15328	46.9939	12573	38.5474	8017	24.5792	7939	24.3401	4678	14.3422	4286	13.1404	91.6204
Skin	17309	53.0674	14467	44.3542	11963	36.6772	6600	20.2348	6220	19.0698	5812	17.8189	5467	16.7612	94.064
Spleen	16375	50.2039	14975	45.9116	12032	36.8887	6881	21.0964	6870	21.0626	5976	18.3217	0	0
WBC	8173	25.0575	4920	15.0842	2898	8.88494	1903	5.83438	1242	3.80783	500	1.53294	407	1.24782	81.4

## Sheet: 2. Gene Tissue Variables
Supplementary Table 2. Gene %CV, slope with age, and correlation with age for each tissue.
	BAT_percentCV_TPM	BAT_percentCV_TMM	BAT_Cor_TPM	BAT_Cor_TMM	BAT_p-val_TPM	BAT_p-val_TMM	BAT_slope_TPM	BAT_slope_TMM	Bone_percentCV_TPM	Bone_percentCV_TMM	Bone_Cor_TPM	Bone_Cor_TMM	Bone_p-val_TPM	Bone_p-val_TMM	Bone_slope_TPM	Bone_slope_TMM	Brain_percentCV_TPM	Brain_percentCV_TMM	Brain_Cor_TPM	Brain_Cor_TMM	Brain_p-val_TPM	Brain_p-val_TMM	Brain_slope_TPM	Brain_slope_TMM	GAT_percentCV_TPM	GAT_percentCV_TMM	GAT_Cor_TPM	GAT_Cor_TMM	GAT_p-val_TPM	GAT_p-val_TMM	GAT_slope_TPM	GAT_slope_TMM	Heart_percentCV_TPM	Heart_percentCV_TMM	Heart_Cor_TPM	Heart_Cor_TMM	Heart_p-val_TPM	Heart_p-val_TMM	Heart_slope_TPM	Heart_slope_TMM	Intestine_percentCV_TPM	Intestine_percentCV_TMM	Intestine_Cor_TPM	Intestine_Cor_TMM	Intestine_p-val_TPM	Intestine_p-val_TMM	Intestine_slope_TPM	Intestine_slope_TMM	Kidney_percentCV_TPM
0610005C13Rik																	-268.583	-73.2685	0.245571	0.230464	0.0734755	0.0936241	0.0247164	0.0211806	1984.24	-6832.62	-0.238244	-0.319016	0.0922667	0.0225054	-0.0312412	-0.0412111	-128.588	-267.995	0.0530609	0.00295913	0.70871	0.983389	0.0062349	0.000325101	7.65764	8.19716	0.184607	0.048151	0.214151	0.747904	0.0112264	0.00334301	2.78566
0610006L08Rik																																																	16.3628
0610009B22Rik	5.31167	6.9419	-0.29165	-0.244063	0.0378433	0.0843556	-0.0107913	-0.0100458	20.4332	32.7014	0.0871944	0.0624224	0.578222	0.690883	0.00866443	0.0049406	4.58606	12.6332	-0.239048	-0.233223	0.0817055	0.0896548	-0.0076495	-0.0111853	3.44861	8.61736	-0.151951	-0.351667	0.287129	0.0113886	-0.00352693	-0.0134968	4.631	10.3376	-0.395275	-0.368259	0.00372923	0.00722884	-0.0117003	-0.0176101	5.2688	8.78466	-0.30244	-0.426147	0.0388043	0.00282023	-0.0110102	-0.0188936	3.89276
0610009E02Rik																	100.549	-142.966	0.215009	0.186015	0.118444	0.178067	0.0268214	0.0232856	194.539	-135.801	-0.0922466	-0.196363	0.519695	0.167268	-0.00953312	-0.019503	-262.908	-96.1454	-0.159533	-0.209931	0.258604	0.135245	-0.0164529	-0.0223627									113.801
0610009L18Rik	27.4039	73.8423	0.221639	0.22588	0.118032	0.110983	0.0184967	0.0192422	52.2621	-958.848	0.26374	0.269344	0.0874693	0.080707	0.0432157	0.0394919	14.7321	270.884	0.0754044	0.0167481	0.587878	0.904324	0.00479868	0.00126284	10.5659	30.0537	0.103392	-0.0662104	0.470293	0.644353	0.00571688	-0.00425296	7.92133	22.2758	-0.187315	-0.222411	0.183612	0.11302	-0.00806386	-0.0139737	32.5199	172.263	0.233889	0.17629	0.113577	0.235878	0.0253317	0.0174483	12.1084
0610010K14Rik	45.262	38.9706	-0.183001	-0.188631	0.19866	0.184962	-0.0139561	-0.0132106	23.3552	31.1914	-0.0133973	-0.0783002	0.932049	0.617718	-0.00101621	-0.00474005	13.444	28.1294	-0.0479039	-0.11148	0.730861	0.422239	-0.00255559	-0.00609142	11.6646	17.5476	0.0831976	-0.153784	0.561626	0.281285	0.00347672	-0.00649313	32.0951	49.6372	-0.284232	-0.346346	0.0411381	0.0118964	-0.018855	-0.0247648	32.6154	44.1141	-0.0880067	-0.203793	0.556371	0.169447	-0.00648964	-0.014373	13.6723
0610012G03Rik	3.06377	4.34833	0.0237054	0.0373054	0.868852	0.794941	0.000653571	0.00139908	17.6638	21.6506	0.0663876	0.0353116	0.672316	0.822135	0.00677228	0.00304845	3.66215	8.84208	-0.392868	-0.308297	0.00329716	0.0233258	-0.0116142	-0.01515	4.19058	8.52581	-0.160254	-0.310147	0.261289	0.0267658	-0.00487221	-0.0148421	3.32309	7.25652	-0.370795	-0.311946	0.00680898	0.0243669	-0.0100581	-0.0159679	4.51406	6.18675	-0.430354	-0.548252	0.00253284	6.62433e-05	-0.0158878	-0.0237712	4.03317
0610025J13Rik	86.2095	246.944	-0.0168758	-0.00987159	0.906434	0.945188	-0.00188628	-0.00114077																									120.364	-192.975	-0.0790481	-0.132643	0.5775	0.348551	-0.00921637	-0.0151262
0610030E20Rik	98.2812	22.9726	-0.0564103	-0.047893	0.694189	0.738578	-0.00384505	-0.00309954	106.687	64.5573	-0.142279	-0.179039	0.362753	0.250658	-0.0174231	-0.021147	-196.384	-205.249	0.136842	0.0948412	0.32379	0.495131	0.0129952	0.00945934	22.0049	17.634	-0.395704	-0.566169	0.00405099	1.48951e-05	-0.0169072	-0.0268771	-100.582	95.5004	-0.00835582	-0.0921507	0.953119	0.515861	-0.000535052	-0.00644486	35.9074	18.0581	0.149252	0.027796	0.316688	0.852865	0.00949526	0.00161187	41.9332
0610031O16Rik									385.865	-392.152	0.084949	0.0626152	0.588084	0.689976	0.0137848	0.010061																																	95.1235
0610033M10Rik																																																	148.675
0610038B21Rik									833.137	-312.852	0.148595	0.124083	0.341612	0.427916	0.0162339	0.01251	331.518	-134.095	0.185698	0.159694	0.178821	0.248719	0.0210097	0.0174739	50.4612	62.102	0.145563	0.00597158	0.30811	0.966827	0.0103635	0.000393656	108.593	88.0679	-0.127031	-0.191603	0.3695	0.173599	-0.00908554	-0.0149953									54.4536
0610039K10Rik									84.4866	-233.932	-0.30203	-0.341614	0.0490197	0.0249597	-0.0479617	-0.0516855
0610040B10Rik	28.7805	29.2259	0.110713	0.106017	0.439266	0.459038	0.00592925	0.00667476	124.008	-335.607	-0.0288276	-0.0737684	0.854404	0.63827	-0.00305304	-0.00677687	24.695	171.356	0.165899	0.0955085	0.230565	0.492088	0.00889317	0.00535734	24.5476	49.0865	-0.192402	-0.332814	0.176171	0.0170184	-0.0107165	-0.0206864	67.7914	129.874	0.119156	0.0275536	0.400145	0.846255	0.00774104	0.00183123	212.558	977.326	0.126275	0.0652104	0.397677	0.66321	0.016187	0.00830366	83.7527
0610040F04Rik									117.168	-7042.98	0.114095	0.0868392	0.466304	0.579777	0.0142666	0.0105427	32.5274	128.599	0.133835	0.0973479	0.334637	0.483749	0.0101237	0.00658785																									15.6963
0610040J01Rik									26.3705	29.69	0.083782	0.0443893	0.59324	0.777451	0.00633017	0.00260634	9.008	15.8078	-0.26205	-0.318305	0.0555936	0.0189917	-0.0102347	-0.0137705	81.9677	173.914	0.228017	0.151365	0.107555	0.289013	0.0252161	0.0152463	10.6042	15.6205	0.0543541	-0.06048	0.701936	0.670169	0.00231294	-0.00359686	4.2857	5.39117	0.0867795	-0.108408	0.56191	0.468247	0.00311548	-0.00476791	4.35395
0610043K17Rik									56.9782	-223.84	0.364688	0.341656	0.0161986	0.0249404	0.048211	0.0444872	26.7337	-685.156	0.323646	0.286881	0.0169729	0.0354445	0.0303844	0.0268486	44.1211	-892.501	-0.0733536	-0.161465	0.608964	0.257655	-0.00839563	-0.0183655																	13.8092
0710001A04Rik
1010001B22Rik																									42.7847	-168.118	0.164509	0.069915	0.248671	0.625895	0.0177379	0.00776806	92.8244	-95.3227	-0.033985	-0.0815737	0.810965	0.565362	-0.00435909	-0.0102689									60.2306
1110002E22Rik									54.2069	22.7109	0.163064	0.141915	0.296121	0.363993	0.0141588	0.0104349	105.306	36.1068	0.220515	0.218427	0.109084	0.112564	0.0169181	0.0133823									7.05871	6.02116	-0.0394069	-0.170169	0.781498	0.227781	-0.00131409	-0.00722389	-53.2089	1841.57	-0.201592	-0.253592	0.174202	0.0854385	-0.0254889	-0.0333723
1110002J07Rik
1110002L01Rik	67.9378	23.8594	-0.171293	-0.172517	0.229419	0.226057	-0.0107471	-0.0100015	118.039	89.5431	-0.047858	-0.102688	0.760554	0.512297	-0.00488623	-0.00861006	18.8533	23.8818	-0.366804	-0.453014	0.0063684	0.000582251	-0.0182121	-0.021748	41.7291	39.6654	0.104367	-0.0562333	0.466095	0.695102	0.00635853	-0.00361132	37.6995	28.1746	0.0208795	-0.0823965	0.883195	0.561433	0.00105169	-0.00485811	-802.827	133.809	0.237379	0.166384	0.108137	0.263665	0.022897	0.0150136	30.5404
1110003F10Rik																	39.5369	-89.7366	0.13674	0.108613	0.324153	0.434345	0.0139727	0.0104368
1110004F10Rik	4.75264	4.74652	0.049373	0.0681105	0.730799	0.634858	0.00146007	0.00220558	13.3403	12.9932	0.0718836	0.0340206	0.646898	0.828538	0.00623208	0.00250825	2.51667	5.57677	-0.0532048	-0.119519	0.70239	0.389337	-0.00114607	-0.0046819	2.7039	4.08168	0.158244	-0.256538	0.267398	0.069191	0.0031075	-0.00686234	3.90042	6.29307	0.0458074	-0.114987	0.747103	0.41695	0.00119064	-0.00471916	5.63854	4.11949	0.26479	0.0829156	0.0720687	0.579517	0.0101544	0.00227105	3.23554
1110006O24Rik																									27.2861	522.132	-0.123289	-0.22396	0.388727	0.114134	-0.00973744	-0.0197073																	23.4811
1110015O18Rik									57.8896	134.325	0.187882	0.162081	0.227624	0.299083	0.0219665	0.0182426	21.4799	48.2309	-0.157354	-0.231141	0.25581	0.0926379	-0.0107462	-0.014282									1254.35	-332.036	0.225957	0.212573	0.107246	0.130287	0.0330271	0.0271173
1110017D15Rik																	27.0701	280.949	-0.0100032	-0.0560725	0.942769	0.687152	-0.000763044	-0.00429888
1110018N20Rik	22.2212	23.6469	0.234368	0.250264	0.0978481	0.0765212	0.0148156	0.0155611									17.9138	57.8644	0.00527374	-0.0444214	0.969809	0.749765	0.000339956	-0.00319588	20.4955	45.7424	0.153062	-0.00667317	0.283578	0.962932	0.00950028	-0.000469563	25.0862	39.9859	-0.193127	-0.28548	0.170139	0.0402191	-0.0123647	-0.0182745									-1115.39
1110019B22Rik																																																	19.8587
1110019D14Rik	16.5988	15.3838	-0.166119	-0.167293	0.244007	0.240642	-0.00934513	-0.00859962	41.854	136.091	0.142423	0.109671	0.362262	0.483875	0.0120639	0.00834011	20.3454	74.8063	-0.165351	-0.245508	0.232128	0.0735517	-0.00979824	-0.0133341	11.7353	17.9954	0.354568	0.138867	0.0106835	0.331129	0.0166424	0.00667257	13.5332	20.7172	0.119626	-0.0146957	0.398276	0.917644	0.00517549	-0.000734314	18.5968	28.373	-0.000282646	-0.145989	0.998496	0.3275	-1.43807e-05	-0.00789777	12.7298
1110020A21Rik	76.2286	132.365	-0.0624998	-0.0556133	0.663055	0.698303	-0.00676688	-0.00602136	224.275	-72.3586	0.0170318	-0.016491	0.913677	0.916408	0.00192154	-0.00180229									56.0474	-360.377	-0.0544813	-0.163071	0.70416	0.252889	-0.00490894	-0.0148788	1021.32	-90.5805	0.21452	0.163736	0.12672	0.246106	0.0240821	0.0181723	46.7962	341.543	-0.406667	-0.454896	0.00455942	0.001316	-0.0316516	-0.039535	61.7575
1110025L11Rik
1110025M09Rik																									48.21	-128.685	0.0817738	-0.0300635	0.568365	0.83412	0.00726479	-0.00270506
1110028F11Rik
1110028F18Rik
1110032A03Rik	6.3826	5.4006	0.521752	0.478177	8.62306e-05	0.000386803	0.0191086	0.0198542	24.5207	14.6902	-0.00734112	-0.0872247	0.962736	0.578089	-0.000501808	-0.00422564	4.95518	8.10213	0.230349	0.0533806	0.0937924	0.701453	0.0055697	0.00203387	3.31088	5.71037	0.240748	-0.155181	0.0887941	0.276884	0.00447609	-0.00549376	13.217	10.2334	0.318781	0.134188	0.0212599	0.342916	0.0112052	0.00529537	6.76952	6.52636	0.229369	-0.0548322	0.120928	0.714317	0.00604091	-0.00184248	4.27429
1110032F04Rik																	6.8512	12.6817	-0.237978	-0.237133	0.0831228	0.0842561	-0.00943064	-0.0129665																									38.4056
1110038B12Rik	42.9457	44.2018	-0.236209	-0.216443	0.0951661	0.127124	-0.0181675	-0.017422	17.2835	20.6322	-0.132696	-0.216461	0.396289	0.163258	-0.0104752	-0.014199	9.17729	22.6556	0.150089	0.0491385	0.278689	0.724196	0.00619888	0.00266305	11.01	15.7813	0.160357	-0.0746954	0.260977	0.602411	0.00686541	-0.00310444	47.87	74.9242	0.0869454	0.0173478	0.539947	0.902847	0.00725568	0.00134588	15.3586	16.7048	0.100954	-0.00558818	0.499551	0.970262	0.00750157	-0.000381819	12.9843
1110038F14Rik	7.80147	8.06962	-0.153251	-0.124933	0.282975	0.382384	-0.00559801	-0.00485249	19.5378	22.0161	0.0769361	0.042416	0.623876	0.78711	0.00665522	0.00293139	5.54924	12.3944	0.031796	-0.0585403	0.819458	0.674137	0.000976468	-0.00255937	5.24506	7.33332	0.182363	-0.138813	0.200259	0.33132	0.005401	-0.00456885	8.38825	13.6054	-0.296742	-0.325637	0.0326635	0.0184864	-0.01103	-0.0169398	8.79213	8.32042	0.0324838	-0.181449	0.828397	0.222231	0.0014084	-0.00647498	6.5324
1110046J04Rik									86.7496	97.5956	0.195692	0.17584	0.208526	0.259362	0.0181823	0.0144585	19.527	31.8869	-0.101064	-0.169575	0.467133	0.220252	-0.00491769	-0.00845352	43.3806	43.3467	0.620737	0.519134	1.1777e-06	9.49179e-05	0.0426531	0.0326833	183.138	73.7194	0.12125	0.0518919	0.391856	0.714852	0.00924559	0.00333578	370.357	116.018	0.405134	0.334042	0.00472944	0.0217464	0.0355788	0.0276954
1110051M20Rik	29.3907	13.6634	0.0768746	0.0979398	0.591835	0.494141	0.00446989	0.0052154	23.363	14.3088	0.241763	0.279911	0.118311	0.0690723	0.0194018	0.015678	2.28968	4.35011	-0.00646642	-0.111391	0.962986	0.422609	-0.000114624	-0.00365046	10.3203	7.64346	0.534631	0.347378	5.31475e-05	0.0125041	0.0220551	0.0120853	6.38802	6.3535	0.000538643	-0.170526	0.996976	0.226791	1.47102e-05	-0.00589509	28.5509	14.5355	0.525936	0.509275	0.000146662	0.000256313	0.0334436	0.0255602	6.86774
1110059E24Rik	9.21968	8.05043	-0.0632852	-0.041227	0.659079	0.773926	-0.00247815	-0.00173264	16.1372	13.2191	-0.00982355	-0.0819322	0.950148	0.601452	-0.000723119	-0.00444695	3.03246	6.75375	-0.00459105	-0.106402	0.973716	0.443813	-8.63193e-05	-0.00362215	5.27811	5.91115	0.37451	0.0133795	0.00677839	0.925757	0.0103564	0.00038655	7.23871	7.98699	0.182784	-0.0106071	0.194634	0.940508	0.00553604	-0.000373762	4.54053	4.63497	-0.150759	-0.407161	0.311771	0.00450575	-0.004232	-0.0121154	5.1281
1110059G10Rik	31.7411	12.3282	-0.163656	-0.139703	0.251167	0.328198	-0.00639479	-0.00564928	19.4427	9.43079	0.186908	0.194274	0.230089	0.211909	0.00975711	0.00603327	10.0246	10.6701	-0.0130831	-0.117723	0.925192	0.396551	-0.000423553	-0.00395939	16.0469	12.3217	0.24699	-0.00235285	0.0805821	0.986926	0.00987791	-9.1936e-05	24.3665	11.3932	-0.0476942	-0.230269	0.737053	0.100532	-0.00199799	-0.00790779	12.7615	10.4684	0.0409234	-0.139302	0.784764	0.350379	0.00155521	-0.00632818	16.8659
1110060G06Rik
1110065P20Rik	6.28099	6.06524	-0.154447	-0.12859	0.279192	0.368499	-0.00487165	-0.00412614	58.2495	102.251	-0.099493	-0.134072	0.525577	0.391366	-0.0142968	-0.0180206	6.85051	13.8452	-0.168963	-0.182055	0.221946	0.18765	-0.00700162	-0.0105375	10.1316	16.1714	-0.252162	-0.372775	0.0742418	0.0070598	-0.011885	-0.0218548	14.4844	22.1743	-0.261724	-0.284517	0.0608952	0.0409273	-0.0133737	-0.0192835	12.7344	12.0497	0.183897	0.0240785	0.215949	0.872368	0.00883302	0.000949634	7.66776
1190005I06Rik	5.60666	7.63824	-0.165162	-0.122932	0.246772	0.390114	-0.00645602	-0.0057105									16.4771	81.6162	0.21906	0.143862	0.1115	0.299345	0.0142431	0.0107072	14.2431	24.8994	-0.291338	-0.414304	0.0380588	0.00250723	-0.0215413	-0.0315111
1190007I07Rik	4.74449	6.55321	-0.282088	-0.21018	0.0449092	0.138776	-0.00803267	-0.00728715	25.9205	44.7227	0.155504	0.154146	0.319379	0.323675	0.0153424	0.0116186	7.50601	19.0991	0.062371	-0.018703	0.654122	0.893217	0.0025838	-0.000952036	8.98758	18.3574	-0.439903	-0.552542	0.00123761	2.62191e-05	-0.0190999	-0.0290698	6.10784	13.2857	-0.151101	-0.206831	0.284946	0.141241	-0.00499395	-0.0109038	8.54102	9.94942	0.186312	0.0183658	0.209876	0.90248	0.0085918	0.000708414	6.9856
1190028D05Rik
1200007C13Rik																									2634.61	-214.259	0.524447	0.49348	7.80509e-05	0.000233599	0.0812831	0.0713133
1300002E11Rik	11.7676	8.28148	-0.0977301	-0.0745518	0.495071	0.603111	-0.00366452	-0.00291901	26.2692	18.5787	0.168761	0.161823	0.279337	0.299861	0.012563	0.00883913	8.37512	11.0925	-0.0651076	-0.156322	0.639968	0.258979	-0.00208959	-0.00562543	7.96119	7.88772	0.237009	-0.0583314	0.0940174	0.68431	0.00794405	-0.00202579	15.8942	13.6413	-0.0602135	-0.18537	0.67154	0.188286	-0.00237997	-0.00828977	4.35549	5.29062	0.302428	-0.0386591	0.0388126	0.796412	0.00667665	-0.00120673	6.20286
1300014J16Rik	89.8485	144.435	-0.349979	-0.349572	0.011817	0.0119222	-0.041546	-0.0408005	57.5226	-1342.02	0.156382	0.13242	0.316621	0.397281	0.0166633	0.0129395	32.9475	-396.944	0.308946	0.258993	0.0230215	0.058614	0.0249063	0.0213704	48.9006	798.125	-0.212958	-0.307149	0.133514	0.0283506	-0.0197505	-0.0297204	156.834	-255.194	-0.150034	-0.202482	0.288402	0.149984	-0.0183072	-0.024217	25.4386	43.128	0.0486019	-0.0502123	0.745622	0.737489	0.00390043	-0.00398295	19.2016
1300017J02Rik									20.085	17.3858	-0.0360449	-0.084223	0.818502	0.591289	-0.00331794	-0.00704178	178.992	384.018	0.185831	0.183865	0.178504	0.183224	0.0261607	0.0226249									-264.087	202.535	0.136236	0.105994	0.335533	0.454543	0.0159589	0.0100491									-101.794
1500002C15Rik									99.1908	1077.2	-0.00222	-0.0370722	0.988727	0.81342	-0.000254798	-0.00397863	20.6474	64.2735	-0.217804	-0.236298	0.113619	0.0853866	-0.0128075	-0.0163434	48.7636	96.1955	-0.190889	-0.295041	0.17966	0.0355694	-0.0178118	-0.0277817									314.284	-2759.21	0.356071	0.293937	0.014031	0.0449189	0.040144	0.0322606	157.041
1500002F19Rik																																																	315.037
1500004A13Rik	-35.7746	59.3254	-0.121242	-0.121162	0.39671	0.397026	-0.010215	-0.00946948	229.718	23.0714	-0.0440557	-0.118555	0.779082	0.448938	-0.00319248	-0.00691631	5.11558	5.15047	-0.0172155	-0.114321	0.901666	0.410433	-0.000460767	-0.0039966	513.029	21.2014	0.210111	0.0501831	0.138908	0.726553	0.0124698	0.00249994	-103.689	22.3934	0.191444	0.107118	0.173963	0.449744	0.0114907	0.00558085	-79.9784	27.8274	0.270038	0.193604	0.0664018	0.192263	0.0194945	0.0116111	-96.3286
1500005C15Rik
1500009C09Rik																	9.11274	15.3282	-0.0832456	-0.126898	0.549537	0.36051	-0.0047703	-0.00830613
1500009L16Rik									27.2377	23.039	0.390263	0.439593	0.00967569	0.00318347	0.0274339	0.0237101	5.68566	10.7418	0.0242831	-0.0675818	0.861634	0.627281	0.000674041	-0.00286179	103.784	108.28	0.517574	0.472811	0.00010047	0.000459074	0.0571057	0.0471358	28.9368	21.9358	0.286476	0.192128	0.0394977	0.172402	0.0158313	0.00992151	-716.64	323.398	-0.179768	-0.265756	0.226616	0.0709979	-0.0192776	-0.027161	2679.28
1500011B03Rik	47.7959	30.6067	-0.0356326	-0.0242574	0.803951	0.865826	-0.00229619	-0.00155068	29.0746	35.4768	-0.0747037	-0.127648	0.634006	0.414657	-0.00629482	-0.0100187	2.77671	5.78038	-0.179174	-0.186582	0.19485	0.176724	-0.00431495	-0.00785079	10.2546	13.1868	0.179851	-0.0639216	0.206634	0.655864	0.00717496	-0.00279488	53.0104	57.1027	-0.0881833	-0.161869	0.53417	0.251606	-0.00607746	-0.0119873	38.3979	33.8501	0.495279	0.448052	0.000400892	0.00158732	0.0384966	0.0306132	11.4212
1500012K07Rik									101.576	201.535	0.0299934	0.00497738	0.848583	0.974729	0.00446341	0.000739579	93.1228	2230.3	0.184188	0.181353	0.182444	0.189386	0.0255721	0.0220362
1500015A07Rik	49.8464	40.1089	-0.198462	-0.17718	0.162686	0.213566	-0.0141248	-0.0133793	63.4512	132.376	-0.0856002	-0.124426	0.585216	0.426632	-0.00967766	-0.0134015	10.2764	20.7001	-0.368863	-0.411573	0.00605716	0.00198846	-0.0143135	-0.0178493	26.3659	46.4846	-0.251877	-0.39367	0.0745807	0.00426226	-0.0145195	-0.0244893	64.021	87.0298	-0.0116521	-0.0849794	0.934659	0.549184	-0.000900607	-0.00681041	33.1876	34.957	0.00399171	-0.101582	0.978756	0.496873	0.000322362	-0.00756103	15.1532
1500015L24Rik																	78.519	-1656.35	0.443286	0.44918	0.000787796	0.000656626	0.0454013	0.0418654
1500026H17Rik	1091.93	112.031	-0.0335942	-0.0250488	0.814963	0.861491	-0.00369304	-0.00294753	215.051	1134.72	0.120533	0.096791	0.441354	0.536938	0.0150987	0.0113749	35.0187	66.2132	0.0481628	0.0017459	0.729461	0.990003	0.00364917	0.000113332									-224.194	-333.533	0.229928	0.198551	0.10105	0.158227	0.0267915	0.0208817									19.9991
1500035N22Rik	42.8781	68.6358	-0.0813911	-0.0784405	0.570183	0.584287	-0.0114504	-0.0107049	37.9977	-607.547	-0.163585	-0.240213	0.294559	0.120761	-0.015921	-0.0196448	15.1789	117.461	-0.101962	-0.159753	0.463162	0.248541	-0.00611846	-0.00965429	38.8308	823.475	-0.379858	-0.473746	0.00597115	0.000445673	-0.0390542	-0.049024									39.6097	224.617	0.037376	-0.0424389	0.803033	0.776993	0.00378924	-0.00409414	39.4355
1520401A03Rik									500.203	396.976	0.162987	0.151705	0.296352	0.331488	0.028733	0.0250092
1600010M07Rik									29.2945	47.1691	-0.0100441	-0.0613443	0.94903	0.695963	-0.000903069	-0.0046269
1600012H06Rik	5.68527	5.05483	-0.214828	-0.176624	0.130055	0.21503	-0.00642544	-0.00567993	18.0139	16.4243	-0.0218189	-0.0724432	0.889548	0.644331	-0.0020302	-0.00575403	3.75465	7.30246	0.0329031	-0.0776772	0.813282	0.576641	0.000736951	-0.00279888	3.90369	4.45802	0.0846025	-0.275833	0.555014	0.0500896	0.00217044	-0.0077994	4.71319	7.17222	-0.150786	-0.24672	0.285964	0.0778588	-0.00354551	-0.00945531	3.32646	4.23228	0.0599007	-0.205762	0.689186	0.165274	0.00140776	-0.00647563	3.42646
1600012P17Rik
1600014C10Rik	4.75843	3.80317	0.137988	0.167216	0.334228	0.24086	0.00511324	0.00585875	18.1607	15.3102	-0.00414767	-0.0469946	0.978941	0.76475	-0.000436177	-0.00416001	3.66286	6.58482	-0.186851	-0.208199	0.176091	0.130852	-0.00448825	-0.00802408	3.65328	5.06067	-0.598044	-0.658705	3.58114e-06	1.48408e-07	-0.0184474	-0.0284172	4.22764	6.10845	-0.06833	-0.178382	0.630289	0.205786	-0.00186617	-0.00777597	5.5825	6.36844	-0.035578	-0.175231	0.812333	0.23875	-0.00153536	-0.00941875	5.60092
1600019K03Rik
1600020E01Rik	18.4658	11.9731	-0.329695	-0.307475	0.0181472	0.0281746	-0.0166908	-0.0159452	22.3971	16.4823	-0.0344876	-0.109482	0.82622	0.484631	-0.00257909	-0.00630293	10.7816	15.5393	0.0512898	-0.0333814	0.712631	0.810618	0.00196882	-0.00156701	13.4109	13.2487	-0.40555	-0.591266	0.003153	4.9112e-06	-0.0183925	-0.0283623	18.4062	16.4682	0.0140671	-0.116629	0.921155	0.410282	0.000510545	-0.00539926	17.1797	11.8773	0.504359	0.421785	0.000300575	0.00314816	0.0291586	0.0212752	10.3141
1600023N17Rik																	64.9678	-76.5099	0.217702	0.197347	0.113792	0.152609	0.0248246	0.0212887
1600025M17Rik
1600027J07Rik
1600029O15Rik																	39.3699	-1012.07	-0.12113	-0.182795	0.382931	0.185833	-0.0097218	-0.0132576
1700001C19Rik
1700001D01Rik																	47.6742	-118.529	0.0551965	0.0340797	0.691794	0.806731	0.00809635	0.00456051	41.1824	-266.635	0.0897421	0.00438733	0.531142	0.975624	0.0104628	0.000492929	50.0954	-226.8	0.0424509	-0.00943281	0.765084	0.947084	0.00494572	-0.000964085	17.2929	52.3155	-0.0328031	-0.151635	0.826736	0.308932	-0.00239516	-0.0102785	20.6019
1700001F09Rik									46.1164	-8241.58	0.122067	0.0958444	0.435519	0.540945	0.0148803	0.0111565
1700001G01Rik									31.7335	46.3593	-0.00665112	-0.0470482	0.966236	0.764489	-0.000633741	-0.00435757																	129.051	158.862	0.282017	0.280492	0.0428121	0.043997	0.0378438	0.031934
1700001G11Rik
1700001J03Rik
1700001J11Rik									93.803	163.226	0.0491968	0.0251355	0.754061	0.872887	0.00749191	0.00376808
1700001K19Rik
1700001L05Rik	-60.6406	-641.718	0.11235	0.121511	0.432491	0.395657	0.0165514	0.017297	22.9277	13.4834	-0.0348609	-0.124582	0.824369	0.426048	-0.00221416	-0.00593799	28.1622	21.5893	0.146432	0.108799	0.290704	0.433553	0.0086629	0.00512707	59.1419	37.6251	0.4489	0.360428	0.000952934	0.00937332	0.04341	0.0334402	-270.016	108.059	0.260846	0.247124	0.061798	0.0773577	0.0324046	0.0264948	20.7907	12.6166	0.574222	0.495422	2.43945e-05	0.000399108	0.0365826	0.0286992	31.4564
1700001L19Rik																	8.96096	22.326	-0.195973	-0.210218	0.155545	0.127075	-0.00798824	-0.0115241
1700001N15Rik
1700001O22Rik									393.19	-857.504	0.362233	0.347082	0.0169855	0.0225899	0.061363	0.0576391	12.9092	23.946	-0.0205145	-0.0841241	0.882944	0.545317	-0.000941141	-0.00447697	2203.09	-267.752	-0.238263	-0.315134	0.0922399	0.0242941	-0.0288609	-0.0388307																	336.969
1700001P01Rik
1700003C15Rik
1700003E16Rik	-519.484	692.7	0.111269	0.119479	0.436958	0.403665	0.0131507	0.0138963									5.71775	10.1978	-0.0932077	-0.148885	0.502623	0.282608	-0.00334187	-0.0068777									127.842	233.619	-0.122137	-0.177498	0.388375	0.208078	-0.01222	-0.0181298	26.4389	30.5366	0.216263	0.0917054	0.144279	0.539833	0.0134406	0.00555719	16.9583
1700003F12Rik									83.7997	-246.359	-0.110227	-0.132521	0.481648	0.39692	-0.0170508	-0.0207746	62.7823	-125.565	0.280581	0.246824	0.0398711	0.0719733	0.0374633	0.0339275
1700003G18Rik									63.3437	502.367	-0.0332049	-0.0685735	0.83259	0.662161	-0.00337805	-0.00710189																																	-918.405
1700003H04Rik									47.8252	138.133	0.100183	0.0727184	0.522695	0.643071	0.0114204	0.0076966																	271.892	-346.937	-0.112468	-0.169954	0.427295	0.228376	-0.0168658	-0.0227756
1700003I16Rik
1700003L19Rik																	63.6171	-259.815	0.0695104	0.0502661	0.617464	0.718126	0.0099747	0.00643886
1700003M07Rik																	12.6361	54.6374	0.0659217	0.00371176	0.635782	0.978749	0.00375631	0.000220472
1700003P14Rik																																																	72.444
1700006A11Rik									55.0671	105.173	0.1024	0.0720445	0.513486	0.64616	0.0128726	0.00914876
1700006F04Rik
1700006H21Rik
1700006J14Rik									40.3852	45.6524	-0.0994938	-0.196716	0.525574	0.206109	-0.00711608	-0.0108399
1700007E05Rik
1700007F19Rik									248.518	-171.472	-0.0586043	-0.0845086	0.708932	0.590028	-0.00947587	-0.0131997	54.1267	-353.346	0.189987	0.178815	0.168817	0.19576	0.0207006	0.0171648
1700007J10Rik									48.3904	-1437.14	0.107712	0.0696592	0.491763	0.65714	0.00998199	0.00625816	45.8228	-232.49	0.148455	0.129517	0.284015	0.350601	0.0156784	0.0121426	42.38	330.873	-0.134323	-0.260769	0.347348	0.0645716	-0.0118339	-0.0218037	175.068	-209.282	0.107732	0.0712807	0.447135	0.615557	0.014122	0.00821216									126.881
1700007K13Rik																	20.3616	199.629	-0.126889	-0.161847	0.360547	0.242311	-0.0094111	-0.0129469
1700007L15Rik	19.8828	40.6305	0.110257	0.11225	0.441167	0.4329	0.00734653	0.00809204																	19.1579	153.292	0.164353	0.00337322	0.249125	0.981257	0.0102	0.000230182	43.0457	-931.943	0.104197	0.0382381	0.46227	0.787827	0.00983121	0.00392141	31.504	195.881	0.158399	0.0689793	0.287591	0.645004	0.0145872	0.00670385	21.5446
1700007M16Rik
1700007P06Rik
1700008C04Rik
1700008H02Rik									90.6411	-1160.91	0.0351493	0.00640219	0.822939	0.967499	0.00449988	0.000776047
1700008J07Rik	11.579	10.7627	0.0454682	0.0587352	0.751379	0.68224	0.00195717	0.00270268	36.9705	48.1469	0.0210711	-0.0273568	0.893311	0.861758	0.00180797	-0.00191587	22.7957	51.0991	-0.0633813	-0.108867	0.648882	0.433265	-0.00431908	-0.00785492	13.5524	19.9257	-0.340809	-0.48696	0.0143937	0.000290433	-0.0156633	-0.0256331	29.4669	34.9346	-0.0512162	-0.144183	0.71841	0.307831	-0.00292522	-0.00883503	22.2541	21.4929	0.251771	0.145566	0.0877851	0.328919	0.0164597	0.00857627	8.33446
1700008K24Rik
1700008O03Rik																	73.2801	227.868	0.207004	0.174806	0.133126	0.206135	0.0182564	0.0147205
1700008P02Rik
1700009C05Rik									72.328	-280.445	0.140272	0.125803	0.369628	0.421492	0.0233751	0.0196513
1700009J07Rik																																																	151.745
1700009N14Rik
1700010B13Rik									425.844	-159.613	-0.120769	-0.161665	0.440452	0.300342	-0.0168404	-0.0205642
1700010G06Rik
1700010H22Rik									99.2934	-177.396	0.129599	0.112588	0.407501	0.47225	0.0163408	0.0126169
1700010I02Rik									77.2319	-103.508	-0.0831662	-0.107765	0.595968	0.491549	-0.0125489	-0.0162728
1700010I14Rik									37.4234	62.0746	0.0738495	0.0331167	0.6379	0.833028	0.00674246	0.00301863	36.6223	132.573	0.0496088	0.00728225	0.721662	0.95832	0.00407577	0.000539939	81.4228	263.543	0.00219694	-0.102277	0.987793	0.475122	0.000216971	-0.00975287																	55.0393
1700010J16Rik									53.9472	846.324	-0.0231822	-0.0469868	0.882693	0.764788	-0.00344131	-0.00716514
1700010L04Rik									50.9549	186.383	0.173458	0.147218	0.265973	0.346155	0.0195225	0.0157987
1700011B04Rik									205.051	174.488	0.0863479	0.0614747	0.581931	0.695348	0.0117973	0.00807343
1700011L22Rik									169.821	-92.5112	-0.0339773	-0.0576047	0.828753	0.713684	-0.00469598	-0.00841982
1700012A03Rik
1700012B07Rik									-974.752	-127.475	-0.063349	-0.0880224	0.686527	0.574604	-0.0100165	-0.0137403
1700012B09Rik									60.9308	-173.539	-0.112346	-0.143253	0.473207	0.359441	-0.0141854	-0.0179092	45.5443	-135.308	0.191648	0.167478	0.165055	0.226095	0.0232726	0.0197367
1700012D14Rik	60.3525	24.0907	-0.120286	-0.120223	0.400474	0.400722	-0.00854475	-0.00779923	26.4211	17.1203	0.137817	0.11608	0.378148	0.458529	0.00855186	0.00482803	19.1151	22.3891	-0.0326983	-0.104691	0.814424	0.451213	-0.00180882	-0.00534465	20.0897	18.4219	-0.343087	-0.547047	0.0137127	3.27056e-05	-0.0179073	-0.0278771	24.4563	16.1079	0.00833695	-0.115113	0.953224	0.416437	0.000444751	-0.00546505	58.1325	29.1623	0.150312	0.0340283	0.313224	0.820369	0.00979393	0.00191054	18.0099
1700012E03Rik
1700012I11Rik									61.6587	801.105	-0.123957	-0.14655	0.42839	0.348373	-0.0196473	-0.0233711
1700013D24Rik
1700013F07Rik																	29.3338	312.027	-0.0786719	-0.136461	0.571755	0.325152	-0.00631752	-0.00985335
1700013H16Rik
1700013M08Rik																	95.1099	-97.3247	0.269418	0.266263	0.0488295	0.0516389	0.0335884	0.0300526
1700013N06Rik
1700014D04Rik
1700015G11Rik
1700015H07Rik
1700015I17Rik									-592.97	-95.6594	-0.209018	-0.254483	0.178578	0.0995942	-0.0295048	-0.0332286
1700016C15Rik									80.6903	-191.979	-0.0443538	-0.0691922	0.777625	0.659298	-0.00740389	-0.0111277																									24.7276	74.4223	0.221447	0.123215	0.134672	0.409299	0.0202914	0.012408	8.85624
1700016D06Rik
1700016G22Rik
1700016H13Rik
1700016K05Rik
1700016K19Rik																	46.8424	-85.8652	-0.12157	-0.153012	0.381189	0.269326	-0.0121436	-0.0156795
1700016L21Rik									90.3471	-198.721	0.0967191	0.0733253	0.537241	0.640294	0.0150349	0.011311
1700016P04Rik
1700017B05Rik	10.3906	7.06467	-0.317011	-0.310613	0.0234147	0.0265265	-0.0149224	-0.0141769	17.8722	13.7857	-0.00902345	-0.0562406	0.954204	0.720186	-0.000878096	-0.00460193	7.15211	8.95435	0.214528	0.0895789	0.119289	0.51947	0.00707843	0.00354259	7.90868	7.0274	-0.0320578	-0.268991	0.823286	0.0563012	-0.00137884	-0.0113487	10.5952	10.1395	-0.24168	-0.311553	0.0843292	0.0245565	-0.00937706	-0.0152869	9.60865	5.8576	0.518701	0.468098	0.000187563	0.000906545	0.0250671	0.0171837	8.47927
1700017G19Rik
1700017M07Rik
1700017N19Rik									75.5569	154.104	0.123348	0.0991331	0.43068	0.527083	0.0162761	0.0125523
1700018A04Rik									198.867	159.3	0.0683193	0.0422947	0.663339	0.787704	0.00882357	0.00509974	271.638	-933.942	0.156968	0.145511	0.256992	0.293782	0.0198847	0.0163488																	-279.593	331.877	0.443381	0.408107	0.00180004	0.00440448	0.0576572	0.0497738
1700018B08Rik
1700018L02Rik	19.2963	16.6273	-0.149603	-0.128573	0.294728	0.368562	-0.00778847	-0.00704296	63.6727	112.531	0.0736355	0.0437453	0.638877	0.7806	0.00706579	0.00334196	14.2197	22.7014	0.0955783	0.0292909	0.49177	0.833471	0.00491986	0.00138403	16.9152	20.6224	-0.00957025	-0.208211	0.946858	0.142599	-0.000510459	-0.0104803	30.6102	36.7825	-0.136219	-0.216973	0.335592	0.122334	-0.00774035	-0.0136501	14.4243	15.8458	0.368356	0.207884	0.0108468	0.160863	0.0193908	0.0115074	13.6976
1700018P08Rik
1700019A02Rik
1700019C18Rik
1700019D03Rik									57.7479	52.4231	-0.151617	-0.189894	0.331772	0.222595	-0.0159442	-0.019668	4.62078	6.82283	-0.184647	-0.259763	0.181338	0.0578415	-0.0041685	-0.00770433	29.2446	24.6593	0.336017	0.186729	0.0159217	0.18951	0.020838	0.0108682	59.7181	27.9564	0.0700996	-0.016342	0.621436	0.908456	0.00498224	-0.000927568	52.2722	27.7212	0.328199	0.264096	0.0243085	0.0728458	0.0250223	0.0171389	296.349
1700019E08Rik
1700019G24Rik
1700019J19Rik									-2781.59	297.527	-0.0771793	-0.102579	0.622776	0.512748	-0.0106472	-0.0143711
1700019L13Rik
1700019M22Rik
1700019N19Rik
1700020D12Rik
1700020G17Rik
1700020L24Rik	153.666	-923.387	-0.107758	-0.105108	0.45165	0.46292	-0.0134862	-0.0127406	33.1678	92.1359	-0.143622	-0.185345	0.35819	0.234079	-0.0169852	-0.0207091									30.0286	162.988	-0.107997	-0.206988	0.450645	0.145012	-0.00891666	-0.0188865
1700020N01Rik
1700021A07Rik
1700021P04Rik
1700022A22Rik
1700022H16Rik
1700022I11Rik									-416.995	-944.048	-0.0152378	-0.0377193	0.922741	0.810223	-0.0026596	-0.00638343
1700022N22Rik																																																	51.8474
1700023F02Rik
1700023G09Rik
1700023H06Rik									67.9392	-251.925	0.138878	0.115284	0.374454	0.461639	0.0177419	0.014018																																	136.655
1700024B05Rik
1700024B18Rik
1700024G13Rik
1700024I08Rik
1700024J04Rik
1700025F24Rik
1700025G04Rik	-390.704	18.681	0.13274	0.153581	0.353114	0.281929	0.00849186	0.00923737	32.8748	12.5854	0.163207	0.168429	0.295692	0.280296	0.0129095	0.00918567	4.28785	5.60625	-0.222177	-0.235311	0.106374	0.0867386	-0.00485292	-0.00838876	22.6063	10.5557	-0.204961	-0.461206	0.149079	0.000658714	-0.00872007	-0.0186899	8.02106	6.1271	-0.0281355	-0.181159	0.843049	0.198699	-0.000766414	-0.00667622	25.1119	8.9149	0.324742	0.230355	0.0259396	0.119295	0.0181008	0.0102174	101.608
1700025K04Rik
1700025K24Rik
1700025L06Rik
1700025M24Rik
1700025N23Rik
1700025O08Rik
1700026D11Rik									811.161	-361.971	-0.0496652	-0.0774693	0.751794	0.621466	-0.00668586	-0.0104097
1700026F02Rik
1700026J12Rik									51.4911	379.534	-0.028992	-0.0583623	0.853582	0.710081	-0.00376539	-0.00748922
1700027A15Rik
1700027F09Rik
1700027H10Rik									34.3891	485.564	0.0988008	0.0713392	0.528476	0.649399	0.0123704	0.00864654	30.7201	-188.267	-0.131141	-0.176034	0.344542	0.202918	-0.0145101	-0.0180459									80.5293	-145.382	0.0741755	0.035206	0.601249	0.804305	0.0106734	0.00476364
1700027I24Rik
1700027J07Rik									40.4717	44.8357	0.0162981	-0.0331266	0.917383	0.832979	0.00143218	-0.00229165
1700028E10Rik									31.2854	15.1828	0.0516019	-0.0195446	0.74244	0.901	0.00289839	-0.00082544	48.3953	31.7899	0.199739	0.19462	0.147598	0.158475	0.0151079	0.011572	222.263	62.0745	0.551426	0.516319	2.7431e-05	0.000105149	0.0588705	0.0489007	-706.641	45.5486	0.158728	0.120251	0.261044	0.395797	0.0143794	0.00846963	-95.3373	162.222	0.379372	0.315201	0.00854023	0.0309228	0.0405784	0.032695	68.7657
1700028J19Rik									364.18	-235.038	-0.00094277	-0.0334018	0.995213	0.831611	-0.000119674	-0.00384351	107.336	-150.307	0.0962933	0.0576674	0.488521	0.67873	0.00922417	0.00568834									-357.366	-241.443	0.378808	0.340583	0.00561863	0.0134873	0.0477309	0.0418211	516.988	3352.83	-0.182751	-0.248199	0.218874	0.0925327	-0.018778	-0.0266614	9.66298
1700028K03Rik									162.247	54.1995	-0.0503171	-0.0894391	0.748641	0.568437	-0.005547	-0.00927083	70.0987	38.7415	-0.036508	-0.0970623	0.793254	0.485039	-0.00305919	-0.00659502	-117.624	521.206	0.258744	0.204166	0.0667508	0.150695	0.0326141	0.0226442	-122.074	137.759	0.0674996	0.0281054	0.634461	0.843215	0.00908339	0.00317359
1700028N14Rik									43.7924	-578.07	0.114104	0.0941336	0.466267	0.548225	0.0138396	0.0101157									33.4087	-578.376	0.283075	0.188599	0.0441339	0.185035	0.0249325	0.0149627									70.4367	-280.869	0.246761	0.195996	0.0944996	0.186719	0.0336535	0.0257701	56.1434
1700028P14Rik																	26.6386	-232.542	0.0815623	0.0425066	0.557666	0.760223	0.00672548	0.00318965
1700028P15Rik
1700029F12Rik
1700029H14Rik									88.593	2081.97	0.0857504	0.0700258	0.584556	0.655447	0.0143606	0.0106368
1700029I15Rik	19.3165	21.6707	0.112296	0.129068	0.432714	0.366704	0.00739275	0.00813826	109.854	-185.244	0.282191	0.270547	0.0667462	0.0793093	0.0380189	0.034295	16.6804	71.0727	0.143207	0.0766301	0.301572	0.581806	0.00847061	0.00493478	14.5133	23.6829	-0.165763	-0.321306	0.245032	0.0215034	-0.0108055	-0.0207753	242.547	-166.781	0.0629916	0.0118432	0.657305	0.93359	0.00738836	0.00147856	16.4897	26.3702	0.190585	0.0532264	0.199422	0.722344	0.0109481	0.00306471	23.8344
1700029J03Rik
1700029J07Rik	131.308	52.5404	-0.118752	-0.119258	0.40655	0.404541	-0.0110637	-0.0103182	34.6625	37.0951	0.218493	0.204104	0.159246	0.18924	0.0147389	0.0110151	14.8466	18.5771	0.24772	0.217585	0.0709128	0.113991	0.0131008	0.00956495	21.2878	23.265	0.0128699	-0.168974	0.928578	0.23588	0.000748434	-0.00922141	28.9767	22.4534	0.0124817	-0.109946	0.930018	0.437797	0.000694604	-0.0052152	2528.59	457.423	0.334434	0.293094	0.0215833	0.0455658	0.0412137	0.0333303	12.843
1700029M03Rik
1700029N11Rik									79.9477	-476.51	0.0909859	0.0742914	0.56174	0.635884	0.0129876	0.00926381
1700030C10Rik	156.523	163.765	0.300742	0.314547	0.0320009	0.0245747	0.0333969	0.0341425	68.6333	399.791	0.139681	0.116028	0.37167	0.458733	0.0167213	0.0129975	40.9409	1592.67	0.312342	0.271867	0.021483	0.0467356	0.0286897	0.0251539	23.0146	35.3996	0.634705	0.527271	5.67863e-07	7.02481e-05	0.0533772	0.0434074	51.2827	85.4892	0.231957	0.179193	0.0979935	0.2037	0.0211925	0.0152827									32.2218
1700030E10Rik
1700030F04Rik
1700030J22Rik																	10.3704	19.3053	-0.0667868	-0.126139	0.631346	0.363415	-0.00256858	-0.00610442																									32.2406
1700030K09Rik	11.4809	8.92276	-0.0872352	-0.0718004	0.542722	0.616587	-0.00369699	-0.00295148	25.2849	18.1036	-0.0865431	-0.214796	0.581075	0.166599	-0.00735742	-0.0110813	6.63737	10.0085	-0.0691076	-0.153005	0.619509	0.269349	-0.00230927	-0.00584511	6.90837	8.40597	-0.282201	-0.52766	0.0448197	6.92309e-05	-0.00923351	-0.0192034	10.2562	12.8276	-0.25222	-0.31622	0.0712534	0.0223825	-0.00918464	-0.0150944	24.316	21.8728	0.208341	0.0855365	0.159923	0.567547	0.0130256	0.00514224	10.7677
1700030L20Rik
1700030L22Rik																	45.8253	-126.532	0.0697609	0.0420711	0.616193	0.762608	0.00819522	0.00465938
1700030N03Rik
1700031A10Rik
1700031F05Rik
1700031L13Rik
1700031M16Rik
1700031P21Rik
1700034E13Rik
1700034J04Rik
1700034J05Rik									59.5097	82.5538	0.101533	0.0650858	0.517077	0.678391	0.00981955	0.00609572	144.022	-372.727	0.287856	0.29439	0.0347978	0.0307085	0.036932	0.0333962	39.0564	42.1181	0.0383824	-0.119063	0.789155	0.405317	0.00273938	-0.00723047	571.771	283.737	0.0430642	0.00323356	0.761789	0.981849	0.00632211	0.000412311									200.711
1700034K08Rik									97.9486	-138.203	-0.0379556	-0.0610856	0.809056	0.697183	-0.00604177	-0.0097656
1700034P13Rik	-172.636	204.336	0.179147	0.181642	0.208444	0.202072	0.0164117	0.0171572	55.5149	65.9162	0.12078	0.0917295	0.440412	0.558533	0.0110611	0.00733723	47.1903	134.094	0.0378556	-0.00804722	0.785799	0.953946	0.00297107	-0.000564764	115.236	186.543	0.389531	0.301011	0.00472244	0.0318404	0.034727	0.0247571									43.1833	39.1494	0.236507	0.117072	0.109477	0.43322	0.016447	0.00856363	27.2758
1700036A12Rik
1700036G14Rik
1700037C18Rik	39.0458	23.5247	0.0488279	0.0600036	0.733661	0.675753	0.00291472	0.00366023	24.8893	21.5588	-0.0224522	-0.105353	0.886362	0.501354	-0.00148622	-0.00521006	10.8644	17.0654	-0.0537942	-0.125884	0.699249	0.364394	-0.00217894	-0.00571477	16.7363	17.3466	0.349316	0.151744	0.0119889	0.287794	0.0168688	0.00689899	30.2697	24.6827	-0.0587103	-0.171854	0.67929	0.22314	-0.00328853	-0.00919833	22.461	18.1691	0.282672	0.17103	0.0542061	0.250373	0.0174646	0.00958122	10.1858
1700037H04Rik	4.18579	4.0596	0.254867	0.268479	0.0710861	0.0567896	0.0119292	0.0126747	16.4848	17.3684	-0.0866406	-0.135708	0.580647	0.385559	-0.00926345	-0.0129873	3.26214	6.97694	-0.0782823	-0.125448	0.573667	0.36607	-0.00206559	-0.00560142	5.42818	7.24515	-0.437811	-0.549323	0.00131381	2.98579e-05	-0.0198241	-0.0297939	9.51004	11.7637	0.0583589	-0.0758573	0.681108	0.593004	0.00236681	-0.003543	6.10533	5.92456	0.436236	0.248159	0.00217443	0.0925871	0.0165728	0.00868943	5.38684
1700039M15Rik
1700040D17Rik																	11.8715	37.5095	0.148088	0.0866855	0.285221	0.533104	0.00801416	0.00447833
1700040F17Rik
1700041G16Rik
1700041M19Rik									-1432.12	-256.926	0.0669165	0.0432664	0.669854	0.782944	0.0108311	0.00710728
1700042O10Rik																																									49.1292	195.942	-0.106742	-0.164485	0.475151	0.269231	-0.0123266	-0.02021
1700044C05Rik
1700045H11Rik
1700046C09Rik
1700047F07Rik									62.5377	-326.424	0.148477	0.124253	0.342001	0.427281	0.0184714	0.0147476	38.9945	-119.992	0.123383	0.0896363	0.374076	0.519202	0.0113642	0.00782833
1700047G03Rik									129.339	-193.089	0.115212	0.0889541	0.461919	0.570545	0.0155328	0.011809									33.6453	47.3621	0.562944	0.505001	1.70666e-05	0.000157273	0.106418	0.0964477
1700047G07Rik
1700047K16Rik									72.8243	-115.454	0.0860885	0.0564399	0.58307	0.719234	0.0103044	0.00658055	37.7127	-106.582	0.0179395	-0.0198786	0.897553	0.886548	0.00171629	-0.00181955	80.3557	-150.018	-0.0326433	-0.109655	0.820112	0.44368	-0.00424153	-0.0142114																	160.068
1700047L14Rik
1700047M11Rik									27.7895	27.68	0.0731091	0.0443749	0.641283	0.777521	0.00759065	0.00386682	8.57147	12.9128	0.06757	-0.0168826	0.627341	0.903559	0.00277389	-0.000761939									-123.514	-119.266	0.0789201	0.0424094	0.578118	0.765307	0.0112858	0.00537595
1700047N06Rik
1700048M11Rik
1700048O20Rik									67.7158	478.392	-0.09275	-0.150872	0.554147	0.334181	-0.00810732	-0.0118312	13.7609	31.2202	-0.120605	-0.165982	0.385009	0.230327	-0.00616471	-0.00970054
1700049E15Rik
1700052H01Rik									106.921	-170.975	-0.122787	-0.144286	0.432796	0.35595	-0.019233	-0.0229568
1700052K11Rik	36.6527	22.3572	-0.204117	-0.190365	0.150796	0.180882	-0.0146905	-0.013945	37.4006	33.1798	-0.142091	-0.230081	0.363392	0.137734	-0.0106255	-0.0143493	13.5781	21.6368	-0.196266	-0.239223	0.154915	0.0814762	-0.00824494	-0.0117808	12.9963	16.366	-0.0770197	-0.258147	0.591134	0.0674039	-0.00312988	-0.0130997	32.0598	26.109	-0.0314763	-0.127905	0.824691	0.36619	-0.00174246	-0.00765226	72.7737	41.1266	0.348864	0.282482	0.0162465	0.0543748	0.0272236	0.0193402	22.7241
1700054O05Rik
1700055D18Rik	96.6815	41.735	-0.257825	-0.241722	0.067758	0.0874711	-0.0236006	-0.0228551	-403.079	-276.491	0.279615	0.262883	0.0693797	0.088541	0.0338328	0.030109	1070.36	-139.943	0.160883	0.131224	0.245165	0.344234	0.0166703	0.0131345	25.7764	24.8396	0.145592	-0.034776	0.308011	0.808574	0.00811889	-0.00185095									-150.836	-400.473	0.0409604	-0.0156359	0.784574	0.91692	0.00577646	-0.00210693	49.1781
1700056E22Rik	20.7748	25.6579	-0.0608338	-0.0494645	0.67152	0.730319	-0.00448523	-0.00373971																	17.1461	40.0548	0.0485896	-0.0973965	0.734913	0.496551	0.00303191	-0.00693793	319.498	-142.573	0.0327084	-0.0127694	0.817943	0.928409	0.00421294	-0.00169686
1700056N10Rik	151.687	-634.547	-0.179969	-0.176541	0.20633	0.21525	-0.0211672	-0.0204217	25.5872	65.6922	0.187472	0.177011	0.22866	0.256153	0.0166937	0.0129699	17.2202	70.7002	0.152285	0.103876	0.271635	0.454767	0.0106882	0.00715236	27.2505	116.545	0.20328	0.0808081	0.152514	0.572957	0.0153693	0.00539941	98.4401	-665.46	0.222805	0.197884	0.112367	0.159658	0.0325744	0.0266646	28.182	70.5699	0.190697	0.100195	0.199153	0.502797	0.0148969	0.00701352	42.8218
1700057G04Rik									47.7136	94.217	-0.0131832	-0.0465562	0.933133	0.766883	-0.00153072	-0.00525456
1700057H15Rik
1700057H21Rik
1700058P15Rik																																									54.2766	-145.12	-0.0354037	-0.0912457	0.813236	0.541876	-0.00489571	-0.0127791
1700060C16Rik									83.7464	-103.295	0.0341311	0.0101113	0.82799	0.94869	0.00518686	0.00146302
1700060J05Rik									76.8899	-173.377	-0.252694	-0.273243	0.102079	0.0762471	-0.0311055	-0.0348293
1700061F12Rik
1700061H18Rik																																									53.6889	397.592	-0.106375	-0.174553	0.476678	0.240602	-0.0113679	-0.0192513
1700061I17Rik
1700061J23Rik
1700062C10Rik
1700063A18Rik
1700063D05Rik																	29.031	162.124	0.366404	0.318811	0.00643051	0.0187921	0.0314031	0.0278672
1700063H04Rik
1700063K16Rik
1700064H15Rik
1700065D16Rik
1700065L07Rik
1700065O20Rik
1700066B17Rik
1700066B19Rik	-78.773	-151.536	-0.109977	-0.104829	0.442337	0.464113	-0.0149904	-0.0142449	603.478	-443.616	-0.0889519	-0.113523	0.570554	0.468555	-0.0135044	-0.0172282									-110.981	-72.5304	0.212703	0.121982	0.133989	0.393814	0.0228142	0.0128444	-91.0549	-87.5904	0.208931	0.18302	0.137158	0.19405	0.0284615	0.0225517	35.8201	30.4641	0.122186	0.0265584	0.413254	0.859349	0.00976216	0.00187877
1700066M21Rik	14.8329	9.89455	-0.11699	-0.116765	0.413601	0.414506	-0.00592476	-0.00517924	22.5363	21.225	-0.325314	-0.415915	0.0332833	0.00553939	-0.0338713	-0.0375951	3.09241	5.36239	-0.190678	-0.245388	0.167244	0.0736974	-0.0040073	-0.00754314	9.95765	10.4724	0.20217	-0.041796	0.154815	0.77089	0.00828285	-0.001687	17.8824	14.8242	0.169819	0.0607534	0.228753	0.668764	0.00881423	0.00290443	18.1323	13.2675	0.221563	0.0937325	0.134463	0.530872	0.0120251	0.00414168	8.78522
1700066N21Rik
1700066O22Rik
1700067K01Rik	48.2988	45.6297	-0.109548	-0.0960681	0.444128	0.50247	-0.00866304	-0.00791753	62.9345	381.473	0.286	0.272453	0.0629975	0.0771351	0.0264513	0.0227275	25.5845	97.7829	0.113065	0.0631784	0.415629	0.649933	0.00759585	0.00406002	52.77	194.986	-0.221194	-0.349039	0.11879	0.0120614	-0.0178722	-0.0278421	64.771	122.676	-0.00855292	-0.0802757	0.952014	0.571585	-0.000686933	-0.00659674	37.0813	51.2478	0.175115	0.075522	0.239065	0.613887	0.0137384	0.00585503	15.7424
1700069L16Rik
1700071M16Rik	489.258	114.417	0.0993387	0.109986	0.487964	0.442296	0.0136388	0.0143843	39.2952	48.0304	0.0768393	0.0360453	0.624313	0.8185	0.00643503	0.0027112	31.9545	60.321	0.178579	0.151117	0.196361	0.275372	0.0134749	0.0099391	157.685	803.499	0.28113	0.175429	0.0456729	0.2182	0.0250262	0.0150563	-235.565	-248.807	0.335053	0.342467	0.015182	0.0129484	0.0519261	0.0460163	-990.278	8851.31	0.0740261	0.00167962	0.620945	0.99106	0.00805873	0.000175342	-279.354
1700073E17Rik
1700074H08Rik
1700080N15Rik																	17.3539	32.563	-0.0875114	-0.147429	0.529194	0.287396	-0.0071675	-0.0107033
1700081B01Rik
1700081N11Rik	26.7119	53.3739	-0.347446	-0.340178	0.0124856	0.0145874	-0.0315438	-0.0307982																									35.9359	1169.61	0.114731	0.046229	0.417995	0.744854	0.0103425	0.00443269
1700082M22Rik
1700083H02Rik
1700084E18Rik																									110.172	-212.735	-0.202544	-0.274588	0.154037	0.0511761	-0.0240674	-0.0340373
1700084F23Rik
1700084J12Rik									40.4315	90.6234	0.153685	0.115624	0.325142	0.460308	0.0131934	0.00946953									63.5517	335.592	0.28217	0.182616	0.0448447	0.199623	0.0235496	0.0135797									461.825	-431.867	0.0750561	0.0154599	0.616082	0.917852	0.00979986	0.00191647	76.1295
1700085C21Rik									83.122	-287.82	-0.0670652	-0.0942642	0.669162	0.547668	-0.0100004	-0.0137242
1700085D07Rik																	18.8995	-293.525	0.0303541	-0.00809452	0.827517	0.953676	0.00283802	-0.000697812
1700086L19Rik																	5.56502	15.1972	-0.294589	-0.311666	0.0305903	0.021782	-0.0095122	-0.013048
1700086O06Rik	17.172	16.7886	-0.0608937	-0.0466232	0.671215	0.745273	-0.00368648	-0.00294097	28.3255	37.1613	-0.00843039	-0.0658149	0.957211	0.674986	-0.00071749	-0.00444132	16.9448	44.5902	0.09246	0.0261641	0.506071	0.851034	0.00514163	0.0016058	16.2737	25.545	-0.235066	-0.424747	0.0968248	0.00189218	-0.0117028	-0.0216727	46.8334	73.5402	-0.1374	-0.225229	0.331381	0.108412	-0.00909748	-0.0150073	40.7483	51.773	0.154264	0.0563099	0.300522	0.706958	0.0117813	0.00389789	25.0435
1700087M22Rik
1700088E04Rik																	106.438	156.302	0.189565	0.12971	0.169783	0.34988	0.0123746	0.00883879	-116.116	-357.514	-0.0898697	-0.191676	0.530556	0.17784	-0.0089769	-0.0189467																	66.8477
1700091H14Rik
1700092C02Rik
1700092E19Rik									95.6654	718.703	0.109727	0.0846838	0.483649	0.589255	0.0145362	0.0108124
1700093K21Rik									248.483	-289.449	0.0294219	0.00679957	0.851435	0.965483	0.00480449	0.00108066
1700094M23Rik
1700095A21Rik									44.3214	178.768	-0.0242919	-0.0537629	0.87712	0.732045	-0.00328413	-0.00700796
1700095J03Rik																	97.1324	-127.742	0.372399	0.351976	0.00555356	0.00905237	0.0438975	0.0403617
1700095J07Rik
1700095K22Rik
1700096K18Rik	6.95083	8.13252	0.461229	0.440063	0.000658259	0.00123195	0.0175773	0.0183228	39.5599	94.3219	0.179459	0.168661	0.249528	0.279626	0.0197784	0.0160546	17.2842	77.7707	0.18472	0.110701	0.181161	0.425509	0.010621	0.0070852	8.94569	16.0597	-0.43187	-0.521836	0.00155368	8.59641e-05	-0.0202208	-0.0301906	18.7368	33.1118	0.120861	0.012585	0.39339	0.92944	0.00668197	0.000772162	22.9745	41.5444	0.0626163	-0.0584851	0.675854	0.696173	0.00397866	-0.00390473	14.968
1700097M23Rik
1700097N02Rik																																									49.477	255664	0.130547	0.0621866	0.38177	0.677957	0.0140431	0.00615973
1700100I10Rik
1700101I11Rik																	41.0504	-817.942	0.0786739	0.0300549	0.571746	0.829192	0.00626951	0.00273368									374.766	-335.834	0.134184	0.0793197	0.342929	0.576189	0.0152308	0.00932099									26.4183
1700101O22Rik
1700102F20Rik
1700102P08Rik									48.6644	1491.95	-0.207616	-0.259258	0.181575	0.0931879	-0.0215154	-0.0252392	33.9865	-293.9	-0.058233	-0.109904	0.675753	0.428868	-0.00501032	-0.00854615									139.057	-176.117	0.148229	0.107733	0.294308	0.447133	0.0167719	0.0108621
1700104L18Rik
1700105P06Rik																																	407.473	-92.1234	0.0282624	-0.0168278	0.84235	0.905747	0.00375047	-0.00215934
1700108F19Rik
1700109G14Rik
1700109H08Rik	273.5	65.1753	-0.423089	-0.431678	0.00197982	0.00156204	-0.0370521	-0.0363066	33.8208	32.9949	0.0899947	0.0555146	0.566027	0.723654	0.00724224	0.00351841	18.6029	23.4703	-0.00519576	-0.0693995	0.970256	0.618026	-0.000342513	-0.00387835	29.9924	30.2817	0.174109	0.0305621	0.221738	0.831408	0.0117187	0.00174886	55.3587	44.9438	0.300918	0.252485	0.0301801	0.0709466	0.0265399	0.0206301	36.3883	31.2207	0.2659	0.16157	0.0708391	0.277928	0.0189399	0.0110565	34.0631
1700109I08Rik
1700109K24Rik	54.0636	64.5674	0.0326259	0.0421436	0.820206	0.769037	0.00296214	0.00370765	30.6709	76.0361	-0.088083	-0.140656	0.574339	0.368306	-0.00751584	-0.0112397	13.1661	26.118	-0.0658311	-0.136212	0.636248	0.326044	-0.00395464	-0.00749047	22.0752	46.1615	0.0501419	-0.103493	0.726769	0.469859	0.00330186	-0.00666799	53.5826	124.346	-0.0145179	-0.0920694	0.918637	0.516232	-0.00130877	-0.00721857	140.87	-426.474	0.149306	0.0892242	0.316509	0.550901	0.0178468	0.00996343	104.397
1700110I07Rik
1700110K17Rik																																									88.4554	-1087.45	0.175366	0.123623	0.238382	0.407739	0.0259476	0.0180642
1700111E14Rik									91.7879	-145.599	0.0151604	-0.0102092	0.923132	0.948194	0.00228615	-0.00143768
1700111N16Rik
1700112D23Rik																	24.533	-117.822	0.24667	0.206089	0.0721556	0.134887	0.0189283	0.0153925
1700112H15Rik
1700112J16Rik	1126.78	157.089	0.177567	0.190786	0.212551	0.179901	0.0202762	0.0210217									57.9514	-11752.1	0.254183	0.224695	0.0636333	0.102365	0.0225039	0.0189681	199.25	-714.803	0.122907	0.0343727	0.390209	0.810753	0.0136727	0.00370285
1700112K13Rik
1700113A16Rik	138.84	9367.87	-0.169204	-0.159824	0.235233	0.262588	-0.0207663	-0.0200208									44.8693	-120.166	0.107952	0.0695992	0.437162	0.617014	0.0105424	0.00700656	40.956	-664.292	-0.104999	-0.215425	0.463384	0.128966	-0.00855047	-0.0185203									39.0925	419.677	-0.0162689	-0.128453	0.913569	0.389519	-0.00118113	-0.00906452	17.1084
1700113B19Rik
1700113H08Rik
1700119H24Rik																																									19.2109	101.847	-0.0688969	-0.178335	0.6454	0.230401	-0.00469119	-0.0125746	43.3943
1700119I11Rik																																	20.3871	83.2787	-0.144223	-0.201825	0.307694	0.15134	-0.013254	-0.0191638
1700120C14Rik	-226.982	-321.836	0.116954	0.131696	0.413744	0.356944	0.0129217	0.0136672	50.3314	113.124	-0.120763	-0.182613	0.440475	0.241166	-0.0123644	-0.0160882	36.2408	304.492	0.367709	0.321768	0.00622994	0.0176609	0.0298789	0.026343	120.231	-312.98	0.159055	0.0611313	0.264922	0.670005	0.015757	0.00578712	17.2832	24.2989	-0.247878	-0.316513	0.0764303	0.0222517	-0.0129896	-0.0188994									174.576
1700120C18Rik
1700120O09Rik	35.3634	65.1128	-0.0154844	-0.00648215	0.914118	0.963992	-0.00127356	-0.00052805																	33.1798	266.88	0.0605826	-0.0628424	0.6728	0.66132	0.0052193	-0.00475055
1700121L03Rik
1700122E12Rik
1700123J17Rik									2582.58	-111.165	0.0887242	0.0676344	0.571545	0.666517	0.0137535	0.0100297
1700123K08Rik
1700123L14Rik
1700123M08Rik									109.809	-213.721	0.287545	0.283811	0.0615254	0.0651302	0.0434331	0.0397092	40.0446	-259.743	0.245629	0.218376	0.0734055	0.11265	0.023671	0.0201351	63.9411	-156.036	0.289852	0.168887	0.039097	0.236126	0.0245408	0.014571	19.5901	37.7424	0.0796398	-0.0240045	0.574645	0.865863	0.00451363	-0.00139617
1700123O12Rik									88.426	-880.643	-0.169505	-0.19451	0.277191	0.211344	-0.022882	-0.0266058
1700123O20Rik	5.95328	6.1753	-0.147411	-0.11933	0.301943	0.404255	-0.00533394	-0.00458843	19.4246	21.8953	-0.117655	-0.175738	0.452414	0.259645	-0.0126001	-0.016324	4.0328	8.91653	-0.285652	-0.286373	0.0362748	0.0357857	-0.00708103	-0.0106169	4.57957	7.2734	-0.0188901	-0.287404	0.895325	0.0408593	-0.000533409	-0.0105033	7.51062	11.7466	0.0865772	-0.0637785	0.541671	0.653294	0.00295147	-0.00295834	4.13753	4.88947	0.00617204	-0.255315	0.967157	0.0832637	0.000173651	-0.00770974	3.83177
1700123O21Rik
1700125H20Rik
1700126A01Rik
1700126G02Rik
1700128A07Rik
1700128E19Rik
1700128F08Rik
1700129C05Rik
1700129L04Rik
1810006J02Rik									23.9845	44.0005	0.106133	0.0528551	0.498172	0.736406	0.00756872	0.00384489																									160.062	2077.33	0.301956	0.242697	0.0391331	0.100233	0.0353011	0.0274177
1810007C17Rik
1810007D17Rik
1810008B01Rik
1810008I18Rik
1810009A15Rik	18.2297	21.1628	0.0685366	0.0799777	0.632737	0.576919	0.00389285	0.00463836	38.2247	88.9912	-0.268632	-0.338686	0.0815421	0.0263117	-0.0297862	-0.0335101	22.5036	111.356	0.10482	0.0501148	0.450656	0.71894	0.00769146	0.00415563	9.93401	17.7232	-0.0364907	-0.271891	0.799326	0.0535962	-0.00145517	-0.011425	35.3263	80.2403	-0.139578	-0.192864	0.3237	0.170733	-0.0107957	-0.0167055	15.7572	22.6871	0.212273	0.0745336	0.15201	0.618547	0.0119371	0.00405367	13.9921
1810009J06Rik
1810010H24Rik	26.8526	28.8298	0.134961	0.143384	0.345043	0.315484	0.00821071	0.00895623	55.0173	135.047	0.366276	0.393996	0.0157064	0.00894479	0.0468955	0.0431717	8.93616	19.6511	0.34867	0.226139	0.0097696	0.100121	0.0150383	0.0115024	9.5717	11.6931	0.200143	-0.0355544	0.159082	0.804372	0.008663	-0.00130685	43.5505	79.1265	0.130538	0.0597973	0.356321	0.673683	0.0116556	0.00574582	24.699	36.6274	0.399298	0.279586	0.00542883	0.0570036	0.0301723	0.022289	28.1308
1810010K12Rik
1810013D15Rik																																	-1729.61	-236.469	0.110461	0.0671338	0.435644	0.636303	0.0138421	0.00793231
1810013L24Rik	6.35248	4.76703	-0.111664	-0.0860075	0.435323	0.548438	-0.00354818	-0.00280267	15.8508	11.4447	0.0575296	0.0154034	0.714041	0.921904	0.0047026	0.000978769	2.99629	4.82451	-0.253452	-0.281475	0.0644248	0.039217	-0.00499259	-0.00852843	5.2381	4.80641	0.233904	-0.074746	0.0985342	0.602165	0.007578	-0.00239185	4.84313	6.6389	0.0263638	-0.112003	0.852819	0.429221	0.000748245	-0.00516156	4.39792	3.9498	0.179531	-0.107577	0.227239	0.471683	0.00481125	-0.00307214	4.24706
1810014B01Rik	10.6108	9.77006	-0.221422	-0.188015	0.118401	0.186426	-0.00942018	-0.00867467	24.7104	18.228	0.136837	0.156425	0.381582	0.316485	0.0107876	0.00706373	9.87932	16.4986	0.102623	0.00722758	0.460253	0.958633	0.00381505	0.000279214	10.0666	12.1926	0.0319392	-0.231229	0.82393	0.102558	0.00119403	-0.00877581	5.05239	8.1066	0.0218477	-0.147567	0.877819	0.296494	0.000502328	-0.00540748	19.9108	17.3539	0.40613	0.324892	0.00461834	0.0258672	0.025396	0.0175126	10.3244
1810017P11Rik																																									42.1612	1097.54	0.0974324	0.0366922	0.514705	0.806566	0.0125991	0.00471572	18.1913
1810018F18Rik									80.6629	129.944	-0.183192	-0.21779	0.239652	0.160627	-0.0236756	-0.0273994
1810019D21Rik	230.663	447.324	-0.11253	-0.110486	0.431749	0.440211	-0.0126974	-0.0119518																																	8.18835	9.13108	0.311117	0.146049	0.033286	0.3273	0.0136393	0.00575587	5.28577
1810021B22Rik	7.19814	7.82777	0.122729	0.160335	0.390902	0.261046	0.00544064	0.00618616	52.7922	-722.753	0.189585	0.190543	0.223361	0.220988	0.0248254	0.0211016	16.0115	168.214	-0.0426643	-0.0890302	0.75936	0.522042	-0.00258501	-0.00612084	8.69069	22.5618	-0.21444	-0.390065	0.130768	0.00466077	-0.00849854	-0.0184684	13.7824	32.3145	0.102743	-0.00845988	0.468574	0.952535	0.00540202	-0.00050778	16.2264	34.6413	0.429012	0.300865	0.00262155	0.0398818	0.0274147	0.0195314	10.0969
1810024B03Rik	-98.326	1369.93	0.0199568	0.0259652	0.88945	0.856476	0.0022577	0.00300321	414.787	1255.95	0.194624	0.175603	0.21107	0.260015	0.0229157	0.0191919	230.605	-196.522	-0.0505633	-0.095434	0.716529	0.492427	-0.00508866	-0.00862449	-383.099	-269.56	0.131899	0.0487081	0.356198	0.734291	0.015259	0.00528914																	-1014.83
1810028F09Rik																																									257.859	-150.718	-0.178487	-0.239118	0.229999	0.105502	-0.0247727	-0.0326561
1810030O07Rik	6.12011	5.11931	-0.0123506	0.00895969	0.931453	0.950244	-0.00044272	0.000302792	18.0803	16.9966	0.016564	-0.0232343	0.91604	0.882432	0.0017222	-0.00200164	3.63543	6.99222	0.381087	0.154475	0.00446886	0.264719	0.0092335	0.00569767	3.51274	4.15247	0.333245	-0.0791011	0.0168671	0.581115	0.00793173	-0.00203811	5.3276	6.795	-0.154254	-0.268628	0.274898	0.0541576	-0.00483854	-0.0107483	5.71053	4.19748	0.400509	0.25792	0.00527666	0.0800591	0.0149656	0.00708225	5.78826
1810034E14Rik	11.4465	10.1439	0.0171154	0.034632	0.905112	0.809351	0.000756251	0.00150176	58.6627	115.067	-0.0285891	-0.0851981	0.855595	0.586987	-0.00280774	-0.00653158									27.4279	43.5948	0.227539	0.0726129	0.108316	0.612595	0.0145364	0.00456656	9.84876	15.1141	-0.207449	-0.255496	0.140031	0.0675358	-0.00805565	-0.0139655	8.9862	10.6683	0.0706815	-0.101398	0.636848	0.497658	0.00305493	-0.00482846	9.23341
1810037I17Rik	4.90355	7.50274	-0.254734	-0.171421	0.0712385	0.229066	-0.00814433	-0.00739882	15.6414	22.04	-0.0920973	-0.142115	0.55695	0.363311	-0.00897633	-0.0127002	4.6155	11.0898	-0.134606	-0.152581	0.331834	0.270693	-0.00490863	-0.00844447	4.62777	9.44628	-0.10884	-0.267107	0.447097	0.0581159	-0.00375708	-0.0137269	4.4668	10.0927	-0.204249	-0.235843	0.146385	0.0923399	-0.00589035	-0.0118002	3.76888	6.62641	-0.246193	-0.360737	0.0952855	0.0127385	-0.00739937	-0.0152828	5.44828
1810041H14Rik									44.075	-526.333	0.12317	0.108065	0.43135	0.490339	0.0138279	0.0101041	35.9528	-112.487	-0.0940523	-0.131877	0.498742	0.341817	-0.00889421	-0.01243	65.2247	-195.269	-0.0234834	-0.103568	0.87007	0.469535	-0.00292893	-0.0128988									77.3304	-215.676	-0.0153655	-0.0801234	0.918352	0.592395	-0.00189485	-0.00977824	48.9631
1810044D09Rik																									31.7717	-1574.69	-0.0105701	-0.0968864	0.941316	0.49882	-0.00115449	-0.0111243	37.3118	-252.063	0.162651	0.0911857	0.249291	0.520285	0.015848	0.00993815	46.9851	-143.587	-0.0119618	-0.0822382	0.936396	0.58263	-0.0013631	-0.00924649	22.5192
1810046K07Rik									42.3683	129.739	0.222376	0.199706	0.151783	0.19916	0.0234139	0.0196901																									8.29058	12.5813	0.337302	0.144071	0.0204188	0.333965	0.0167193	0.00883589
1810053B23Rik									275.953	136.192	0.00426215	-0.0246204	0.97836	0.875471	0.000550431	-0.0031734
1810055G02Rik	17.5819	15.9903	0.246475	0.248649	0.0812361	0.0785034	0.014927	0.0156725	21.7811	22.3728	-0.228464	-0.30638	0.1406	0.0456943	-0.0266849	-0.0304087	4.93277	9.07363	-0.453595	-0.414092	0.000571669	0.00185339	-0.0142679	-0.0178037	7.81137	9.52143	0.460733	0.22992	0.000668299	0.104573	0.0209384	0.0109685	10.8011	13.8273	0.000128751	-0.112452	0.999277	0.427364	5.6204e-06	-0.00590418	6.61819	8.29954	-0.309936	-0.352919	0.0339962	0.0149661	-0.020199	-0.0280824	9.67896
1810058I24Rik	6.23898	6.87481	0.0268493	0.0395262	0.851643	0.783022	0.000848885	0.0015944	16.5113	16.1877	0.0334392	-0.00325116	0.831425	0.983492	0.00342989	-0.000293938	7.64438	15.1307	-0.102684	-0.145528	0.459987	0.293723	-0.00358584	-0.00712167	4.38091	7.17207	0.184469	-0.0898219	0.19502	0.530775	0.00573315	-0.00423669	4.68853	7.8669	-0.281915	-0.281018	0.0428909	0.0435853	-0.00860355	-0.0145134	4.74006	6.46783	-0.254315	-0.371208	0.0845207	0.0102036	-0.00781306	-0.0156964	4.96822
1810059C17Rik
1810059H22Rik	371.449	39.6044	0.103167	0.112518	0.471267	0.431799	0.00851875	0.00926426	129.158	71.0821	-0.109093	-0.172425	0.486197	0.268875	-0.0107344	-0.0144582	182.035	363.258	0.0125791	-0.0351115	0.928067	0.800998	0.00106411	-0.00247172	-531.184	386.115	-0.024431	-0.118163	0.864875	0.408901	-0.00278976	-0.0127596	-154.002	131.195	0.367644	0.329175	0.00733405	0.0171797	0.0304029	0.0244931	-313.621	84.8599	0.709128	0.645178	2.42222e-08	9.79763e-07	0.0573142	0.0494309	13.2059
1810062G17Rik	34.0872	69.9661	-0.173123	-0.160123	0.224407	0.261684	-0.0141327	-0.0133872																	20.6951	97.8407	-0.154372	-0.291152	0.279429	0.0381875	-0.0100147	-0.0199845
1810062O18Rik									81.6136	570.749	-0.0232211	-0.0585528	0.882497	0.709176	-0.00300296	-0.00672679	22.2278	68.8454	0.0655624	0.0138723	0.637628	0.920694	0.0044308	0.000894962	31.1065	70.7795	-0.0423	-0.184633	0.768204	0.194618	-0.00294553	-0.0129154	245.178	-640.562	-0.0364185	-0.0917411	0.797705	0.517736	-0.00466899	-0.0105788	152.856	2522.13	-0.0526475	-0.122968	0.725245	0.410247	-0.00634678	-0.0142302	91.2284
1810064F22Rik
1810065E05Rik																																									132.394	-181.754	-0.334062	-0.389224	0.0217383	0.0068494	-0.0514651	-0.0593484
2010001A14Rik	16.9946	31.8566	0.307748	0.28388	0.028028	0.0435087	0.0213152	0.0220607									18.0645	303.497	0.316855	0.235552	0.0195739	0.0864073	0.0232381	0.0197023	36.16	1057.42	0.165103	0.0681294	0.246944	0.634764	0.017658	0.00768811									5.85612	12.7638	-0.179323	-0.277155	0.227789	0.0592885	-0.00704527	-0.0149287	12.6496
2010001K21Rik																	-382.739	-100.931	0.0509766	0.0241552	0.714311	0.862356	0.0064261	0.00289026									150.619	74.0503	-0.315639	-0.410729	0.0226439	0.00249042	-0.0280886	-0.0339984	31.3533	24.1113	0.431592	0.297414	0.00245336	0.0423301	0.0252024	0.017319
2010001M07Rik
2010003K11Rik	9.81595	11.6634	-0.382254	-0.354723	0.00563758	0.010647	-0.0232356	-0.0224901																	12.5307	23.0642	-0.656033	-0.672364	1.73343e-07	6.54532e-08	-0.0463846	-0.0563545									6.27077	9.27706	-0.241025	-0.295569	0.102669	0.0436879	-0.0149692	-0.0228526	43.9017
2010007H06Rik	29.8555	15.5096	-0.304031	-0.317333	0.0300813	0.0232668	-0.021242	-0.0204965	55.2288	30.3782	-0.0225446	-0.0994669	0.885898	0.525686	-0.00179286	-0.00551669	42.0538	45.024	0.236443	0.209359	0.0851894	0.128672	0.0129834	0.00944753	17.2809	12.8503	0.0415233	-0.178302	0.772345	0.210635	0.00212433	-0.00784551	52.1491	25.0824	0.0707788	-0.0242034	0.618053	0.864762	0.0045162	-0.0013936	35.2612	18.7386	0.434378	0.393334	0.00228245	0.00623505	0.0312035	0.0233201	101.937
2010008C14Rik									48.6997	-247.675	0.219981	0.222813	0.156356	0.150958	0.0307866	0.0270628																									6.17043	10.3198	0.223255	0.0580834	0.131438	0.69816	0.0109463	0.00306291
2010009K17Rik
2010010A06Rik																																									10.7916	16.7831	-0.393896	-0.430764	0.00615489	0.00250627	-0.0265414	-0.0344248
2010016I18Rik	-161.903	171.58	0.218529	0.230992	0.123412	0.10292	0.024092	0.0248375	34.5871	30.6107	0.250269	0.251855	0.105524	0.103263	0.0252369	0.0215131									19.3631	19.7339	-0.38766	-0.469976	0.00494434	0.000501998	-0.0435561	-0.053526									7.39703	6.62149	0.00549551	-0.225648	0.970755	0.127246	0.000185576	-0.00769781	123.937
2010103J01Rik																																									14.9445	44.6146	-0.25975	-0.302132	0.0778649	0.039013	-0.0229767	-0.0308601
2010106E10Rik																																									4.99869	7.29019	-0.278692	-0.317451	0.0578353	0.0296811	-0.0167757	-0.0246591
2010109A12Rik	247.998	-654.487	0.00353603	0.0106462	0.980353	0.940894	0.000382555	0.00112807
2010110K18Rik									72.9299	142.977	0.0115059	-0.0450331	0.941624	0.774307	0.000863147	-0.00286069
2010203P06Rik
2010204K13Rik																	10.1479	26.0454	-0.00782478	-0.0653891	0.955218	0.63852	-0.000368693	-0.00390453																									21.6464
2010309G21Rik
2010310C07Rik																																									51.4126	63.1932	0.176668	0.0779593	0.234861	0.602461	0.0148287	0.00694532
2010315B03Rik	73.2597	31.5583	-0.179259	-0.178854	0.208156	0.209203	-0.015262	-0.0145165									49.0141	88.3009	0.119981	0.0763374	0.387493	0.583253	0.0090326	0.00549677	36.7596	35.0985	0.082412	-0.112824	0.56534	0.430538	0.00420708	-0.00576276	168.009	65.0294	0.107679	0.0192014	0.447362	0.892525	0.00723419	0.00132439	17.1143	15.3634	0.155081	-0.0138841	0.297936	0.926201	0.00716	-0.000723383	19.0053
2010320O07Rik
2200002D01Rik	1011.16	-824.278	-0.0475473	-0.040079	0.740399	0.780062	-0.00499279	-0.00424728	76.676	-521.992	0.0996097	0.0663245	0.525089	0.67261	0.0109829	0.00725907									27.1734	73.4892	-0.00424917	-0.160071	0.976392	0.261842	-0.000274494	-0.0102443	122.515	-736.024	0.0871673	0.0311805	0.538909	0.826313	0.00893298	0.00302318	4.35734	6.90016	-0.459628	-0.447506	0.0011534	0.00161098	-0.0203758	-0.0282592	16.6139
2200002J24Rik																																									37.7408	194.998	0.403467	0.349005	0.0049207	0.0162003	0.0519667	0.0440833
2210010C04Rik									80.9848	173.155	-0.126791	-0.144291	0.417823	0.355933	-0.0216177	-0.0253416
2210011K15Rik
2210016F16Rik	5.00633	4.41744	-0.140115	-0.117476	0.32676	0.411648	-0.00478748	-0.00404197	16.8239	15.4464	-0.0585573	-0.122536	0.709155	0.433742	-0.00499736	-0.0087212	5.7993	9.85719	0.0274792	-0.0678747	0.843638	0.625786	0.000830642	-0.00270519	3.35837	5.29904	0.120832	-0.197375	0.398323	0.165047	0.00289234	-0.00707751	5.1583	8.34907	-0.325753	-0.314498	0.0184425	0.0231651	-0.0094842	-0.015394	3.05395	4.17216	-0.0992569	-0.263611	0.506825	0.0733937	-0.00290418	-0.0107876	3.16511
2210016L21Rik	18.0335	13.1839	0.219584	0.230704	0.121567	0.103363	0.0112898	0.0120353	26.4387	22.3622	0.0195425	-0.0254486	0.901011	0.871317	0.00185992	-0.00186391	3.11192	6.14214	-0.16325	-0.179647	0.238198	0.193653	-0.00398303	-0.00751887	6.25614	7.86655	0.0942069	-0.205988	0.510822	0.147007	0.00275609	-0.00721376	8.29862	10.6714	-0.136485	-0.225776	0.334641	0.107534	-0.00447476	-0.0103846	6.50059	5.63392	0.187196	-0.0702285	0.207681	0.639014	0.00583679	-0.0020466	4.54634
2210017I01Rik
2210039B01Rik									63.2098	-181.945	0.187233	0.189177	0.229263	0.224378	0.0217637	0.0180399																									23.0203	46.7192	0.394932	0.310642	0.00600944	0.0335703	0.030057	0.0221736
2210406H18Rik									16.8731	27.0362	0.186583	0.168515	0.230913	0.280048	0.014676	0.0109522	31.0133	86226.1	-0.0489181	-0.0981634	0.725384	0.480076	-0.00454218	-0.00807801	35.3252	255.073	0.248742	0.152045	0.0783887	0.286827	0.0209088	0.010939									60.1553	391.879	-0.152643	-0.221758	0.305691	0.134112	-0.018046	-0.0259294	70.7614
2210406O10Rik	-683.035	228.065	-0.0306365	-0.0227667	0.831004	0.874003	-0.00303962	-0.00229411									42.3946	1010.4	0.12406	0.0681176	0.37144	0.624547	0.00852266	0.00498683
2210408F21Rik	6.93592	7.59269	-0.222447	-0.162303	0.116663	0.25516	-0.00700148	-0.00625597	27.3335	28.4854	0.22617	0.25167	0.14474	0.103523	0.0164299	0.0127061	5.52565	10.4879	-0.0479824	-0.130442	0.730436	0.347145	-0.0013751	-0.00491093	6.23697	10.344	0.184354	-0.129432	0.195305	0.365345	0.00508126	-0.00488858	5.50808	9.70173	-0.501974	-0.429541	0.000149762	0.00148407	-0.0133223	-0.0192321	-432.802	-242.647	0.157787	0.110274	0.289483	0.460578	0.0224907	0.0146073	7.51164
2210408I21Rik	63.4874	16.3356	0.0488557	0.0685482	0.733515	0.63268	0.0026166	0.00336211	24.3879	15.604	0.259263	0.241429	0.0931812	0.118836	0.0158926	0.0121688	8.89672	7.54477	0.253065	0.178401	0.0648473	0.196815	0.0089027	0.00536687	13.3355	9.11885	-1.55557e-05	-0.287712	0.999914	0.0406337	-6.25683e-07	-0.00997047	33.5625	12.4667	0.115328	0.0126909	0.415561	0.928848	0.00639325	0.000483446	512.807	38.882	0.223223	0.139309	0.131495	0.350354	0.016669	0.00878557	16.0578
2210411M09Rik
2210414B05Rik
2210417A02Rik																																									38.6033	234.672	0.549437	0.48184	6.34032e-05	0.000605189	0.0759005	0.0680171
2300009A05Rik	5.32229	5.64971	0.0359257	0.0549199	0.80237	0.701889	0.0010936	0.00183911	19.3218	27.2976	0.177642	0.132563	0.254435	0.396769	0.0122256	0.00850178	5.44754	12.1222	-0.181552	-0.215819	0.188892	0.11703	-0.0052173	-0.00875313	8.32617	13.1703	-0.404655	-0.562285	0.00322664	1.75451e-05	-0.015028	-0.0249979	7.9899	11.8332	-0.198536	-0.280952	0.15826	0.0436372	-0.00700564	-0.0129154	11.9641	13.5721	-0.0265614	-0.177462	0.859333	0.232729	-0.00140408	-0.00928747	5.60189
2310001H17Rik	158.085	19.8689	-0.187917	-0.176349	0.18666	0.215757	-0.01082	-0.0100745	18.529	10.7731	0.214808	0.188552	0.166576	0.22594	0.0120223	0.00829847	157.922	95.5404	0.0664813	0.0485228	0.632911	0.727517	0.00954686	0.00601103	33.0678	17.5517	0.0643836	-0.145824	0.653534	0.307233	0.00322389	-0.00674595	94.9174	21.5467	0.120822	0.0449278	0.39354	0.751803	0.00830836	0.00239855	10.0678	5.9765	0.428756	0.243526	0.0026388	0.0990433	0.0159432	0.00805977	17.0936
2310001K20Rik									50.9883	-168.776	0.00408614	-0.0347442	0.979253	0.824948	0.000408959	-0.00331487
2310001K24Rik	17.2835	33.2193	-0.296503	-0.263412	0.0346241	0.0618125	-0.0183894	-0.0176439																	24.8399	91.4426	-0.266259	-0.356515	0.0589483	0.0102317	-0.0256836	-0.0356535	25.9321	85.6123	-0.352078	-0.400483	0.0104767	0.00326166	-0.03073	-0.0366398
2310002F09Rik									966.496	361.154	0.0505969	0.0243804	0.747289	0.876675	0.00690095	0.00317712	115.258	231.574	-0.027244	-0.0777331	0.844959	0.576367	-0.0025442	-0.00608004
2310002L09Rik									31.6664	39.9496	0.443464	0.463914	0.00289693	0.0017279	0.0508277	0.0471039																	5.29698	7.53987	0.662938	0.385241	8.5776e-08	0.00479893	0.0275305	0.0216207
2310003L06Rik
2310008N11Rik
2310009B15Rik	13.6597	16.6258	0.105238	0.100728	0.462362	0.481868	0.00483615	0.00558166	29.863	48.4064	0.166887	0.150313	0.284787	0.335997	0.014822	0.0110982	9.20205	20.4941	0.165263	0.0694779	0.23238	0.617629	0.00700191	0.00346608	14.0193	23.3654	-0.000790904	-0.190953	0.995605	0.179512	-3.94413e-05	-0.0100093	20.2873	30.7418	-0.161505	-0.243575	0.252687	0.081848	-0.0090758	-0.0149856	43.311	67.4214	0.037756	-0.0454363	0.80107	0.761688	0.00360937	-0.00427402	17.2319
2310010J17Rik	8.56182	14.4708	-0.119589	-0.0943549	0.403229	0.510156	-0.00570098	-0.00495547	23.876	134.339	0.166541	0.157216	0.285801	0.314014	0.015471	0.0117472	12.935	88.4678	0.199285	0.123661	0.14854	0.372991	0.0126982	0.00916232	8.58953	25.6146	-0.061772	-0.215253	0.666748	0.12928	-0.00290549	-0.0128753	22.5228	120.524	0.106609	0.0258415	0.451916	0.855703	0.0080005	0.00209069	20.0506	63.5022	0.316191	0.226663	0.0303713	0.125499	0.025575	0.0176916	8.42587
2310011J03Rik	5.14678	5.59381	0.189524	0.200306	0.182852	0.158735	0.0060513	0.00679682	16.5855	19.7005	-0.0633186	-0.116175	0.68667	0.45816	-0.00617321	-0.00989704	4.29156	9.62892	-0.159142	-0.180011	0.25038	0.192739	-0.00486543	-0.00840126	3.40583	5.86846	0.326929	-0.0547917	0.0192008	0.702552	0.00808911	-0.00188074	5.28635	10.1319	0.0253282	-0.104106	0.85854	0.462665	0.000769552	-0.00514025	3.68894	5.29188	-0.164523	-0.355001	0.269121	0.0143426	-0.00459001	-0.0124734	4.03928
2310014F06Rik									128.495	386.72	-0.0163121	-0.0535144	0.917312	0.733238	-0.00184371	-0.00556754	205.378	-182.518	0.144262	0.127392	0.297988	0.358629	0.0191413	0.0156054	61.3122	88.6319	0.503722	0.410966	0.000164451	0.0027381	0.0462926	0.0363227	63.4136	52.4818	-0.0307713	-0.112465	0.828557	0.427308	-0.0027079	-0.0086177									34.5792
2310015A10Rik	56.054	40.1524	-0.0348598	-0.0244554	0.808121	0.864741	-0.00244837	-0.00170285	32.1541	41.8675	0.180499	0.170077	0.24675	0.275549	0.0131545	0.0094307	20.1759	53.1864	0.16784	0.0974077	0.225079	0.483479	0.00950304	0.0059672	19.162	26.4897	0.331884	0.152926	0.0173487	0.284011	0.0182813	0.00831148	12.7752	15.9896	-0.175948	-0.26784	0.212141	0.0548946	-0.00775968	-0.0136695	44.3628	46.486	0.142985	0.0534612	0.337661	0.721169	0.0118314	0.00394797	64.4226
2310015D24Rik									130.608	214.734	0.265065	0.261854	0.0858325	0.0898421	0.0367563	0.0330324																	129.884	91.545	0.18424	0.13309	0.191042	0.346915	0.0172299	0.0113201
2310015K22Rik																																	136.002	-969.065	-0.39657	-0.448674	0.0036077	0.000849738	-0.0516094	-0.0575192
2310016D03Rik
2310016D23Rik
2310016G11Rik																	46.6757	-177.159	0.259024	0.229722	0.058583	0.0947143	0.0229869	0.0194511									12.2606	18.8097	-0.126032	-0.232919	0.373308	0.0965696	-0.00554768	-0.0114575	11.2715	17.488	-0.270718	-0.35292	0.0656936	0.0149656	-0.0139216	-0.021805	30.7453
2310020H05Rik																																	24.6945	82.2212	-0.18024	-0.236107	0.201026	0.091965	-0.015305	-0.0212148
2310022A10Rik	14.2734	7.75026	0.120488	0.161242	0.399678	0.258322	0.00535327	0.00609879	19.0771	13.2909	0.196834	0.204992	0.205831	0.187282	0.0168423	0.0131184	4.63697	6.75175	-0.0557934	-0.136436	0.68863	0.325242	-0.00151056	-0.00504639	7.56003	5.89363	0.386538	0.0909876	0.00508176	0.525434	0.0124793	0.0025095	4.18965	5.96672	-0.0625053	-0.173188	0.659788	0.219514	-0.00164975	-0.00755956	11.1338	6.71045	0.268485	0.109669	0.0680401	0.463055	0.0115002	0.00361681	9.18299
2310022B05Rik	7.70646	5.78996	0.0558902	0.0827967	0.696873	0.56352	0.00189659	0.0026421	18.6508	17.5618	-0.0664694	-0.108786	0.671935	0.48743	-0.00802035	-0.0117442	3.28588	5.65297	0.191666	0.0384993	0.165013	0.782246	0.00506237	0.00152654	5.2871	5.26011	0.21983	-0.0646913	0.12114	0.651984	0.00777051	-0.00219933	4.33335	5.67617	-0.21005	-0.28729	0.135019	0.0389164	-0.00672134	-0.0126311	7.3133	6.3035	0.634782	0.503214	1.65115e-06	0.000311829	0.0286799	0.0207965	4.93503
2310030A07Rik
2310030G06Rik	433.592	255.526	0.105747	0.109295	0.460187	0.445187	0.011588	0.0123335	132.713	-239.043	0.00742341	-0.0300947	0.962318	0.848077	0.000814444	-0.00290939	41.956	540.435	0.47728	0.439324	0.000263077	0.000888767	0.0422871	0.0387513	96.9315	-3708.77	0.284994	0.202446	0.0426566	0.154241	0.0297396	0.0197698	26.1252	36.8674	0.182775	0.0799885	0.194656	0.572966	0.0112103	0.00530051	5.27408	7.89998	-0.310643	-0.404252	0.0335696	0.00482987	-0.0102628	-0.0181462	7.25246
2310033P09Rik	14.5188	18.3097	-0.121797	-0.102434	0.394539	0.474441	-0.0057757	-0.00503019	27.3988	42.7739	0.118	0.104477	0.451082	0.504937	0.0135867	0.00986287	6.96761	18.5951	-0.102192	-0.146641	0.462151	0.290007	-0.00387667	-0.0074125	5.93549	11.013	0.268172	-0.0433933	0.057084	0.762385	0.00834526	-0.00162459	11.2061	20.0866	0.227057	0.076694	0.105501	0.58892	0.00983589	0.00392608	10.7836	14.2618	0.00156462	-0.144425	0.991672	0.332768	8.73085e-05	-0.00779608	9.78905
2310034C09Rik
2310034G01Rik																	19.3427	110.5	-0.0713641	-0.126083	0.608091	0.36363	-0.00438302	-0.00791886	31.8406	214.662	-0.08422	-0.223367	0.55681	0.11512	-0.00550402	-0.0154739									103.491	-1068.2	0.14366	0.0819818	0.335362	0.58381	0.0172325	0.00934916	56.1449
2310034O05Rik
2310039H08Rik	5.20031	8.08157	-0.179342	-0.129662	0.207941	0.364485	-0.00685397	-0.00610846	22.8277	45.911	0.00150875	-0.039053	0.992339	0.803642	0.000168869	-0.00355496	18.6802	213.93	0.0271838	-0.0165665	0.845298	0.905356	0.00207192	-0.00146392	7.35645	15.8367	-0.559011	-0.583019	2.01092e-05	7.14429e-06	-0.028319	-0.0382888	7.39504	15.776	-0.0544007	-0.151146	0.701693	0.284801	-0.00228593	-0.00819573	6.69242	9.44088	0.268811	0.103569	0.067694	0.488447	0.0121994	0.00431602	5.81667
2310039L15Rik									196.524	135.696	0.216798	0.198813	0.162589	0.201217	0.0261669	0.022443																	17.8296	12.5203	-0.195781	-0.345722	0.164231	0.0120604	-0.00833034	-0.0142401
2310040G07Rik	28.2541	61.2846	0.262301	0.26068	0.0629605	0.0646657	0.0238235	0.024569									44.9206	-81.138	0.154068	0.129676	0.265998	0.350005	0.0173719	0.0138361									6.486	14.9306	0.0418138	-0.0897343	0.768512	0.526974	0.00153641	-0.00437339									27.1737
2310040G24Rik	53.2548	246.054	0.272963	0.280197	0.0526235	0.0464268	0.0276337	0.0283792	31.9357	96.1154	0.33695	0.366096	0.0271413	0.0157614	0.0431643	0.0394404	42.2658	-91.7084	0.317062	0.267095	0.0194897	0.0508851	0.0327512	0.0292154	44.9334	-133.582	-0.111782	-0.209145	0.434836	0.140774	-0.01002	-0.0199899	7.00637	16.256	-0.535496	-0.487749	4.30214e-05	0.000244782	-0.0210841	-0.0269939	39.5021	164.737	0.0495755	-0.0173392	0.740702	0.907907	0.00591989	-0.0019635
2310043M15Rik																	88.2552	-134.746	-0.013653	-0.0431304	0.921944	0.756811	-0.00174213	-0.00527796																	75.5259	357.334	0.182771	0.10502	0.218823	0.482344	0.0173182	0.00943485
2310043P16Rik									96.7805	79.3094	0.172853	0.170302	0.267672	0.274906	0.0165935	0.0128697									1021.47	625.468	0.176009	0.086532	0.216656	0.545992	0.0182905	0.00832065																	-101.373
2310046K23Rik
2310050C09Rik
2310057J18Rik
2310057M21Rik	46.0897	8.685	0.0888597	0.111493	0.535204	0.436032	0.00364191	0.00438742	31.5211	8.04076	0.15477	0.171327	0.321698	0.271983	0.00937929	0.00565546	5.55239	5.23921	-0.0776058	-0.186901	0.576993	0.175973	-0.00160537	-0.0051412	15.7114	6.93509	0.357782	0.0573416	0.00994659	0.689394	0.0116723	0.00170241	16.6603	7.85032	-0.0466744	-0.195821	0.74248	0.164143	-0.00152553	-0.00743534	39.6456	9.20244	0.351351	0.247126	0.0154506	0.0939971	0.0176451	0.00976174	30.0032
2310058D17Rik	-211.166	150.094	-0.261101	-0.260504	0.0642194	0.0648528	-0.0244506	-0.023705	61.1904	71.3364	-0.0837246	-0.157899	0.593494	0.311889	-0.00667771	-0.0104015	37.446	105.988	-0.151282	-0.22382	0.274843	0.103745	-0.00916615	-0.012702	131.505	294.647	-0.0849626	-0.227697	0.553325	0.108064	-0.00572301	-0.0156929	-173.743	-333.292	-0.0897503	-0.15836	0.5269	0.262166	-0.00919891	-0.0151087	1195.9	219.341	0.109822	0.0256925	0.462427	0.863891	0.0101059	0.00222249	80.8562
2310061I04Rik	2.86903	3.34167	-0.236992	-0.164619	0.0940416	0.248349	-0.00547312	-0.00472761	19.8674	18.2452	0.217258	0.237656	0.161677	0.124888	0.0195642	0.0158404	2.69391	6.204	-0.288879	-0.24643	0.0341293	0.0724425	-0.00618703	-0.00972286	5.03134	7.98978	-0.447464	-0.567581	0.000994002	1.40273e-05	-0.0132371	-0.0232069	3.3329	6.03323	-0.617754	-0.477818	1.06713e-06	0.000340652	-0.0161913	-0.0221011	2.89021	3.82246	-0.224719	-0.453957	0.128862	0.00135059	-0.00493411	-0.0128175	2.97801
2310061N02Rik
2310065F04Rik									107.685	159.439	0.4035	0.414059	0.00729447	0.00577575	0.0621143	0.0583904
2310067P03Rik
2310068J16Rik	29.9775	41.6517	-0.114119	-0.108355	0.42523	0.449135	-0.0091759	-0.00843039									95.6479	-63.5771	0.163258	0.127212	0.238175	0.359314	0.0180879	0.014552	91.4731	-128.611	-0.112927	-0.205031	0.430114	0.148936	-0.0125117	-0.0224815	163.513	-120.218	-0.0988518	-0.153246	0.48567	0.278086	-0.0105436	-0.0164534	288.941	-128.843	0.261315	0.211868	0.0760275	0.152811	0.0384734	0.03059	97.2337
2310069B03Rik	20.168	19.2728	0.24513	0.257999	0.082964	0.067567	0.0276182	0.0283637																									143.078	972.023	0.153964	0.103262	0.275813	0.46632	0.0158577	0.00994791
2310075C17Rik																	10.3036	40.8398	-0.178067	-0.240545	0.197667	0.0797556	-0.0125347	-0.0160705
2310079G19Rik
2310081O03Rik
2400006E01Rik
2410002F23Rik	20.0112	11.1717	0.00358229	0.0179317	0.980096	0.900608	0.000200026	0.000945539	22.4361	17.0222	0.0301757	-0.00584987	0.847673	0.970302	0.00320382	-0.00052001	4.21356	5.83177	0.153131	0.0246587	0.26895	0.859516	0.00451333	0.000977496	8.42049	6.78513	0.129916	-0.111253	0.363538	0.437024	0.00564704	-0.00432281	12.7023	11.3109	0.151958	0.0274369	0.282194	0.846898	0.00747706	0.00156726	13.6805	9.60747	0.477699	0.424097	0.000684779	0.00297042	0.0343209	0.0264375	9.10917
2410003L11Rik																																																	46.5426
2410004B18Rik	7.51291	7.61508	-0.295517	-0.255866	0.0352594	0.0699484	-0.0098087	-0.00906319	19.0172	20.8393	0.0850391	0.0497711	0.587688	0.751281	0.00695032	0.00322649	3.7394	8.46074	-0.408806	-0.330408	0.00214682	0.0146816	-0.0106884	-0.0142242	6.12457	9.93122	-0.0675238	-0.297645	0.637784	0.0339008	-0.00213143	-0.0121013	5.85656	9.59753	-0.230252	-0.286332	0.100557	0.0396015	-0.00703368	-0.0129435	4.85486	7.20296	-0.308065	-0.431431	0.035148	0.00246356	-0.00885789	-0.0167413	5.98692
2410004I01Rik
2410004P03Rik																	30.7989	56.5257	0.149531	0.0910749	0.280502	0.512491	0.00943869	0.00590286
2410006H16Rik	19.8488	52.8943	-0.0140143	-0.00445611	0.922245	0.975242	-0.0011542	-0.000408687	17.7173	41.8067	0.0610995	0.0299729	0.697118	0.848685	0.00663479	0.00291096	8.31262	31.1117	0.345472	0.231768	0.0105094	0.0917309	0.0194614	0.0159256	9.43633	27.4676	-0.268458	-0.362825	0.0568096	0.00887898	-0.0156174	-0.0255873	21.6991	99.4796	0.000174397	-0.0583365	0.999021	0.681223	1.57022e-05	-0.0058941	10.1114	19.3286	-0.148932	-0.252375	0.317737	0.0870019	-0.0107161	-0.0185995	13.2843
2410012E07Rik
2410017I17Rik																																									60.168	73.5316	-0.216123	-0.254536	0.144545	0.0842416	-0.0235455	-0.0314289
2410018L13Rik									267.889	226.535	-0.0277668	-0.0579594	0.859707	0.711996	-0.0037074	-0.00743123	24.7009	33.3326	-0.235238	-0.310152	0.0868398	0.0224647	-0.0128601	-0.016396									-439.288	222.793	0.147368	0.113642	0.297153	0.422456	0.0179482	0.0120384
2410021H03Rik									50.5023	-416.941	0.0028259	-0.0274667	0.985651	0.861208	0.000374373	-0.00334946	9.39059	19.6179	0.19942	0.164888	0.148259	0.233457	0.0114266	0.00789079																	9.9153	18.4363	-0.0644655	-0.183668	0.666832	0.216532	-0.00369569	-0.0115791
2410022M11Rik	10.8224	11.5306	-0.268398	-0.232177	0.0568675	0.101118	-0.013831	-0.0130855	46.7579	103.37	0.140431	0.115481	0.369082	0.460867	0.0143172	0.0105933	22.5155	75.0371	0.0821584	0.0270414	0.554781	0.846099	0.00563094	0.0020951	11.9076	18.2459	-0.309789	-0.458357	0.0269509	0.000718381	-0.0155427	-0.0255126	21.3209	30.3819	0.00324819	-0.0700354	0.981767	0.621757	0.000227357	-0.00568245	47.8587	62.6562	0.400634	0.354278	0.00526122	0.0145566	0.0411368	0.0332534	12.8609
2410137M14Rik
2500002B13Rik	222.963	91.2526	-0.343605	-0.330002	0.0135616	0.0180335	-0.0385873	-0.0378418	64.5149	98.9251	0.0818905	0.0513374	0.601638	0.743715	0.00784534	0.0041215									181.76	-1101.94	0.0882868	-0.025398	0.537849	0.859579	0.00776135	-0.00220849	57.1791	56.511	0.0995881	0.0125405	0.48241	0.929689	0.00675734	0.000847537	-292.256	-297.881	0.130619	0.0511564	0.381507	0.732734	0.0129345	0.00505113	25.4847
2500004C02Rik	34.5425	27.8161	-0.235719	-0.236148	0.0958746	0.0952534	-0.0152354	-0.0144899	25.0186	30.0073	-0.228903	-0.349995	0.139817	0.0214062	-0.0181546	-0.0218784	6.15473	13.4257	0.0451515	-0.0518757	0.74579	0.709492	0.00136635	-0.00216949	18.3657	24.5467	-0.317787	-0.505807	0.0230595	0.000152898	-0.0194516	-0.0294214	18.9874	21.4413	0.102355	-0.00694482	0.470264	0.961028	0.00554532	-0.000364484	21.9564	24.6729	0.121192	-0.00606359	0.417094	0.967734	0.0075246	-0.000358787	14.1856
2510002D24Rik	9.8688	10.945	-0.520795	-0.487375	8.93174e-05	0.000286466	-0.0259406	-0.025195	18.4607	24.6162	-0.000293828	-0.0511055	0.998508	0.744834	-2.55951e-05	-0.00374943	4.44817	9.71471	-0.0757935	-0.138663	0.585947	0.317331	-0.0022886	-0.00582443	5.19795	8.54113	0.295876	-0.0200716	0.0350273	0.888818	0.00921585	-0.000753991	5.54425	10.2417	-0.089537	-0.169449	0.527887	0.229784	-0.00310413	-0.00901394	6.67531	6.17591	0.26234	0.106325	0.074842	0.476887	0.0114384	0.00355501	4.47205
2510009E07Rik	11.9214	6.31921	-0.0269568	-0.0113691	0.851056	0.936888	-0.00117625	-0.000430738	22.8439	15.6652	-0.110467	-0.179835	0.480685	0.248522	-0.0104295	-0.0141533	5.19494	5.99026	-0.247576	-0.289446	0.0710824	0.0337629	-0.00910863	-0.0126445	7.90068	6.34069	0.0524744	-0.175728	0.714586	0.217403	0.00241562	-0.00755423	7.71189	7.22143	0.0663006	-0.0711706	0.640505	0.616104	0.00254256	-0.00336725	24.2099	12.3891	0.347305	0.296425	0.0167628	0.043054	0.0248248	0.0169414	6.49818
2510016D11Rik	61.4164	167.633	0.1003	0.105669	0.483744	0.460521	0.0104096	0.0111551									82.8947	-69.3755	-0.167931	-0.1913	0.224823	0.165838	-0.0199644	-0.0235003	33.1742	253.315	0.318765	0.21021	0.0226178	0.138719	0.0278688	0.017899																	29.9872
2510017J16Rik																	32.1699	-688.961	0.071758	0.0313277	0.606107	0.822073	0.00609159	0.00255575
2510039O18Rik	6.04249	5.16407	0.137574	0.164004	0.335695	0.250145	0.00516767	0.00591319	15.732	14.7005	-0.0421854	-0.0928171	0.78824	0.553859	-0.00438071	-0.00810454	6.86911	11.1317	-0.014461	-0.0764718	0.91734	0.582588	-0.000621006	-0.00415684	3.88304	4.4417	0.428936	0.0674168	0.00168594	0.638318	0.0119541	0.0019843	4.5435	7.48094	-0.143006	-0.207646	0.311839	0.139645	-0.00422511	-0.0101349	3.20965	3.6306	-0.0260485	-0.275279	0.862022	0.0611009	-0.000717821	-0.00860121	5.08766
2510046G10Rik	22.7296	34.9531	-0.435683	-0.392051	0.00139562	0.00443737	-0.0317043	-0.0309588	38.2215	-2403.47	0.15892	0.14462	0.308733	0.354827	0.0140903	0.0103664	37.9549	-122.536	-0.093104	-0.140208	0.5031	0.311914	-0.00844277	-0.0119786	22.3394	67.764	-0.409388	-0.518834	0.00285371	9.59637e-05	-0.0305313	-0.0405011	60.516	-262.721	0.115847	0.0463493	0.413452	0.744212	0.00960001	0.00369021	88.2231	-187.227	0.22727	0.167164	0.124462	0.261402	0.0246357	0.0167523	33.1131
2600006K01Rik																	71.1021	-127.614	0.286677	0.245045	0.0355817	0.0741144	0.0330358	0.0295	104.023	-216.925	0.18247	0.0940088	0.19999	0.511715	0.0214111	0.0114412
2600014E21Rik									116.629	50.592	-0.0619712	-0.0966079	0.693007	0.537711	-0.00714219	-0.010866	71.3666	39.2599	0.10222	0.081208	0.462025	0.559384	0.00945489	0.00591906	-156.583	322.411	0.123392	0.0590901	0.388327	0.680423	0.0173595	0.00738964	-142.274	156.619	0.172965	0.156059	0.220117	0.269252	0.0265583	0.0206485									-105.398
2610001A08Rik									48.053	-619.677	0.0331409	0.00209459	0.832908	0.989364	0.00397665	0.000252818	29.5839	-394.714	-0.0660647	-0.106107	0.635048	0.445083	-0.00625595	-0.00979179	45.895	-404.269	0.0240056	-0.0749944	0.867206	0.600955	0.00250292	-0.00746692
2610001J05Rik	5.03563	5.30254	-0.127163	-0.0696959	0.37388	0.626981	-0.00294219	-0.00219668	17.7431	13.9819	0.173109	0.162253	0.266952	0.298564	0.0135177	0.00979388	3.86852	7.79609	-0.0394955	-0.109214	0.776754	0.431792	-0.000918743	-0.00445458	4.58458	5.77259	0.503363	0.104491	0.000166515	0.465564	0.0135049	0.00353507	4.03081	6.68096	-0.261904	-0.291534	0.0607109	0.0359967	-0.00560913	-0.0115189	6.64723	4.84956	0.327509	0.0990064	0.0246268	0.507903	0.0105023	0.00261893	4.28558
2610002M06Rik	50.2611	13.2087	-0.272094	-0.308784	0.0534113	0.0274767	-0.014269	-0.0135235	31.989	20.6617	0.0301308	-0.0126974	0.847897	0.935591	0.0027562	-0.000967629	8.90754	10.2241	-0.342626	-0.352909	0.0112082	0.00885843	-0.0164868	-0.0200227	16.1533	11.7797	-0.0833464	-0.304846	0.560924	0.0296202	-0.00405685	-0.0140267	22.8912	14.3251	0.175278	0.0532135	0.213916	0.707909	0.00872302	0.00281322	12.4024	8.28239	0.1377	-0.0356196	0.356002	0.812117	0.00632097	-0.00156241	15.2208
2610005L07Rik	24.0003	13.5055	-0.301537	-0.310734	0.031528	0.0264642	-0.0169596	-0.0162141	16.8663	10.1061	0.0752502	0.0208629	0.63152	0.894359	0.0044872	0.000763371	7.75096	8.34821	-0.0231825	-0.123991	0.867849	0.37171	-0.00087524	-0.00441107	10.2487	8.94552	0.0165564	-0.273024	0.908197	0.0525682	0.000620323	-0.00934952	14.646	8.44291	0.120107	-0.0404124	0.39637	0.776066	0.00472961	-0.0011802	8.07139	5.81126	0.429561	0.23194	0.0025849	0.116704	0.014681	0.0067976	11.0425
2610008E11Rik	32.7242	15.7573	-0.317063	-0.33478	0.023391	0.016338	-0.0246585	-0.023913	19.6793	11.1747	-0.00532093	-0.0880597	0.972986	0.574441	-0.000359743	-0.00408358	6.75479	6.22286	-0.117524	-0.231123	0.397358	0.0926636	-0.00430153	-0.00783736	9.43726	6.61587	-0.0388336	-0.35692	0.786734	0.0101398	-0.00149243	-0.0114623	7.55602	6.34849	0.0620891	-0.117481	0.661916	0.406849	0.00187836	-0.00403144	14.6219	7.5602	0.35205	0.234786	0.0152328	0.11216	0.0160254	0.00814199	9.18119
2610012C04Rik
2610016A17Rik	57.6038	112.627	0.292159	0.280565	0.0374948	0.0461284	0.0320782	0.0328237																	11.1119	16.438	0.567183	0.425384	1.42672e-05	0.00185943	0.0439928	0.0340229																	1093.28
2610017A05Rik									141.222	-220.19	-0.138192	-0.164723	0.376839	0.291169	-0.0182523	-0.0219761	47.5785	-302.639	0.0530283	0.0169051	0.703332	0.903431	0.00499327	0.00145743																									165.698
2610020C07Rik	-86.8993	-278.241	0.0566709	0.0640725	0.692846	0.655102	0.00877995	0.00952546	43.344	33.9539	0.319828	0.387142	0.0365535	0.0103255	0.0253552	0.0216314	39.9121	68.4073	0.179956	0.151736	0.192875	0.273388	0.0126371	0.00910127	332.78	460.239	0.21667	0.110764	0.126717	0.439056	0.0187399	0.00877007									-256.819	21798.2	-0.0564932	-0.119787	0.706047	0.422555	-0.00753375	-0.0154171	-1128.57
2610021A01Rik	40.3121	19.7955	-0.246307	-0.256721	0.081451	0.0689856	-0.0202248	-0.0194793	22.48	12.9045	0.0524248	0.000723385	0.738476	0.996327	0.00375693	3.31003e-05	7.12135	6.71163	-0.2176	-0.350961	0.113965	0.00926768	-0.0083015	-0.0118373	18.1574	13.6733	0.221045	0.0573742	0.119045	0.689226	0.0128178	0.00284792	14.1049	8.84586	0.0823774	-0.069204	0.561524	0.62591	0.00345195	-0.00245785	8.34827	7.16876	0.506915	0.281293	0.00027677	0.0554427	0.0192862	0.0114028	17.0074
2610024D14Rik									23.6811	-386.031	0.0501633	0.0168857	0.749384	0.914415	0.00520213	0.0014783																	52.9215	-105.273	0.0916517	0.0514913	0.518146	0.716961	0.0128672	0.00695739	14.579	64.1284	0.200242	0.104532	0.177163	0.484389	0.0153723	0.00748891
2610027F03Rik
2610027K06Rik									47.2857	73.7721	-0.0739716	-0.125896	0.637342	0.421147	-0.00654686	-0.0102707																	-287.69	-225.163	-0.128701	-0.187109	0.363188	0.184104	-0.0173619	-0.0232717									29.9357
2610028D06Rik									70.011	2903.77	-0.15713	-0.21722	0.314282	0.161751	-0.0167102	-0.0204341	21.5316	55.4027	0.00532652	-0.0432528	0.969507	0.756143	0.000403213	-0.00313262	106.437	-1256.8	0.195141	0.124491	0.169979	0.384085	0.0259295	0.0159596									108.033	446.221	0.114899	0.0509692	0.441863	0.733676	0.0138109	0.00592747	63.8462
2610028E06Rik																	211.277	2948.45	0.132603	0.114356	0.339142	0.410291	0.0147441	0.0112083
2610028H24Rik																																	120.066	388.795	0.3982	0.375563	0.00345984	0.00607677	0.0550524	0.0491426
2610035D17Rik	47.7273	37.6723	-0.211833	-0.220209	0.135626	0.120482	-0.01862	-0.0178745	27.395	31.0202	0.20496	0.222961	0.187351	0.15068	0.0170102	0.0132864	4.80625	9.35339	0.0841318	-0.0233575	0.54528	0.86686	0.00255424	-0.000981598	15.7029	20.0562	0.37221	0.222424	0.00715363	0.116701	0.0235684	0.0135986	14.6109	18.88	0.0447544	-0.0492481	0.752731	0.728809	0.00260414	-0.00330567	12.7179	12.9261	0.209268	0.068294	0.158032	0.648299	0.0111984	0.00331504	11.0319
2610035F20Rik																	85.8759	-188.544	0.0215309	-0.015063	0.877188	0.913911	0.00208022	-0.00145562
2610037D02Rik	-186.581	56.7544	-0.0545313	-0.0516479	0.703901	0.718895	-0.00480062	-0.00405511	30.3466	16.4148	0.0602733	0.00621418	0.701022	0.968453	0.00398875	0.00026492	33.8648	32.1293	-0.12245	-0.213725	0.377727	0.120712	-0.00824149	-0.0117773	68.2784	40.3776	0.123772	-0.0222586	0.386856	0.876792	0.00861077	-0.00135907	155.073	34.5729	0.102415	0.0197173	0.470004	0.889655	0.00696026	0.00105046	98.8979	37.5762	-0.0302055	-0.140681	0.84027	0.345582	-0.00228197	-0.0101654	122.05
2610042L04Rik																	95.9244	-126.937	0.0961307	0.0743021	0.489259	0.593362	0.0112374	0.00770159
2610044O15Rik8	20.3754	12.258	-0.0245731	-0.0126379	0.864096	0.929862	-0.00139008	-0.000644564	18.4512	14.4294	0.202734	0.188905	0.192292	0.225058	0.0132315	0.00950768	5.70989	7.06271	0.0726441	-0.0329803	0.601654	0.812852	0.00237557	-0.00116027	7.55939	7.82739	0.474899	0.149963	0.000429623	0.293557	0.0148871	0.0049173	7.11356	7.97696	0.207049	0.0139493	0.140813	0.921814	0.00646928	0.000559479	15.7424	12.2513	0.409536	0.271755	0.00425534	0.0646262	0.0208947	0.0130113	7.62454
2610203C22Rik	-628.173	46.1123	-0.170779	-0.176543	0.230841	0.215244	-0.0144307	-0.0136852	94.4932	68.9446	-0.047153	-0.0840664	0.76398	0.591982	-0.00511182	-0.00883565	50.4084	55.2381	0.101328	0.063126	0.465962	0.650205	0.00771142	0.00417559	16.0528	11.4382	0.108609	-0.17761	0.448065	0.212439	0.00417737	-0.00579247	54.2845	23.5058	0.126612	0.0341607	0.371094	0.810006	0.00765839	0.00174858									39.8637
2610204G07Rik									56.3227	-850.126	0.30158	0.264356	0.0493741	0.086705	0.0390075	0.0352837
2610206C17Rik									71.2256	232.141	-0.00723915	-0.0362828	0.963253	0.817325	-0.000949942	-0.00467377									268.366	-187.893	0.387873	0.350369	0.00491857	0.0117167	0.0527848	0.042815
2610300M13Rik									38.3319	62.9948	0.233337	0.221669	0.132098	0.153122	0.021868	0.0181442
2610301B20Rik	12.6137	10.7643	-0.226439	-0.218411	0.110079	0.123621	-0.0112262	-0.0104807	16.1126	17.2216	-0.181206	-0.274112	0.244873	0.075281	-0.0128973	-0.0166211	2.76068	6.00572	-0.0951913	-0.15214	0.493533	0.272097	-0.00202067	-0.00555651	5.61286	7.21332	0.0657596	-0.258497	0.646614	0.0670196	0.0018873	-0.00808254	8.18929	9.66032	-0.128015	-0.265589	0.365774	0.0570451	-0.00446334	-0.0103731	21.7837	19.0443	0.155662	0.0456059	0.296108	0.760825	0.0103314	0.00244798	5.46258
2610306M01Rik	12.9939	18.4317	-0.0125357	0.0015772	0.930427	0.991236	-0.000656278	8.92345e-05	48.7037	-503.103	-0.0187635	-0.0644414	0.904939	0.681406	-0.0020012	-0.00572503	9.82942	36.8227	-0.0788754	-0.127618	0.570758	0.357769	-0.00358025	-0.00711609	10.3564	26.2395	-0.0155989	-0.228492	0.913485	0.106804	-0.000641793	-0.0106116	11.7925	23.5843	0.0774429	-0.0438666	0.585276	0.757485	0.0035903	-0.0023195	21.415	49.2835	0.202176	0.0853372	0.172931	0.568454	0.0136178	0.00573441	10.8832
2610306O10Rik																									50.1153	-127.399	-0.0156911	-0.105867	0.912976	0.459677	-0.00176557	-0.0117354	38.1884	287.062	0.215954	0.170746	0.124143	0.226184	0.0249251	0.0190153
2610307P16Rik									24.3215	22.1186	-0.205543	-0.321051	0.186072	0.0358027	-0.0144265	-0.0181503	132.201	3076.72	0.0508237	0.0296303	0.715131	0.831569	0.00720137	0.00366554	142.872	190.87	-0.0274744	-0.128302	0.848229	0.369579	-0.00297697	-0.0129468	77.6291	44.4265	0.149014	0.0973127	0.291729	0.492521	0.0118801	0.00597032									23.5805
2610316D01Rik									34.6475	113.734	0.0522646	0.0166811	0.739247	0.915448	0.00559025	0.00186642	6.62542	13.2921	-0.131112	-0.233057	0.344651	0.0898897	-0.00480134	-0.00833718									153.253	-314.056	0.0796491	0.0464694	0.574601	0.743572	0.0121662	0.00625636
2610318N02Rik									35.6627	54.7572	-0.137531	-0.196011	0.379149	0.207772	-0.0120112	-0.015735
2610507B11Rik	3.84691	2.66974	-0.214574	-0.190638	0.130521	0.180244	-0.00574033	-0.00499482	18.3836	11.5857	0.084837	0.0587824	0.588578	0.708086	0.00831437	0.00459054	3.35719	4.76276	-0.215109	-0.231859	0.118268	0.0916001	-0.00514202	-0.00867785	3.5539	3.49856	0.125691	-0.229303	0.379482	0.105532	0.00314823	-0.00682161	4.72831	5.45629	0.112573	-0.0446529	0.426863	0.753273	0.00370328	-0.00220652	3.6035	3.24935	0.300342	-0.00189893	0.0402458	0.989893	0.00782515	-5.82399e-05	4.06442
2610507I01Rik	8.08644	7.22723	-0.255828	-0.293953	0.0699908	0.0362864	-0.0103858	-0.00964028	20.8152	28.7508	-0.0457473	-0.0908263	0.770823	0.562429	-0.00497756	-0.00870139	6.98276	14.783	-0.0176404	-0.108452	0.899252	0.435028	-0.00064439	-0.00418022	7.96939	12.3729	-0.123027	-0.368647	0.389744	0.00777085	-0.00491056	-0.0148804	8.16982	14.0584	0.00066778	-0.1147	0.996251	0.418121	2.65413e-05	-0.00588326	16.8144	21.0763	0.255757	0.165009	0.0827128	0.267688	0.0178746	0.00999118	9.11853
2610528A11Rik									56.763	-230.116	-0.185817	-0.213283	0.232869	0.169679	-0.0234186	-0.0271424
2610528J11Rik									77.2896	-333.53	0.0976704	0.0673254	0.533227	0.667952	0.012878	0.00915421																									2.69106	5.15202	-0.251102	-0.353371	0.0886603	0.0148288	-0.00628062	-0.014164	2.94097
2700029L08Rik																	87.9342	-106.119	-0.069852	-0.100195	0.615732	0.470988	-0.00839982	-0.0119357
2700038G22Rik									25.7985	40.2416	-0.112885	-0.184455	0.471075	0.236371	-0.0101397	-0.0138636									34.7544	104.015	0.038749	-0.0959275	0.787188	0.503098	0.00293441	-0.00703543	97.2751	880.514	-0.0740597	-0.136894	0.601819	0.333182	-0.00753564	-0.0134454	23.6961	29.3905	0.205388	0.118444	0.166062	0.42781	0.0156241	0.00774067	52.5793
2700046A07Rik																	53.2972	-20779	0.136349	0.101663	0.32555	0.464483	0.0112387	0.00770283
2700046G09Rik	51.2738	56.8444	-0.0846456	-0.0747557	0.554811	0.602118	-0.00724031	-0.0064948	-528.763	-74.4783	0.0339765	0.0089509	0.828757	0.954572	0.00494471	0.00122088	19.0243	80.4673	-0.0568576	-0.108527	0.683002	0.43471	-0.00331377	-0.0068496	14.6367	31.752	-0.0465829	-0.200306	0.745486	0.158735	-0.00227986	-0.0122497	39.7183	91.868	-0.229158	-0.298621	0.10223	0.0315262	-0.0148712	-0.020781	62.1175	201.409	-0.202935	-0.30547	0.171289	0.0367977	-0.0167044	-0.0245878	17.772
2700049A03Rik	86.0733	21.8556	-0.174561	-0.18283	0.220522	0.199087	-0.012654	-0.0119085	16.3941	8.67564	-0.0295006	-0.148519	0.851042	0.341862	-0.00169877	-0.0054226	13.3276	9.34479	0.12574	0.0761335	0.364949	0.584263	0.00615933	0.00262349	18.5943	11.254	0.155748	-0.0591775	0.275113	0.679975	0.00769204	-0.0022778	20.7952	9.58212	0.151774	0.0418351	0.282784	0.768397	0.00740479	0.00149498	20.0871	9.24992	0.363856	0.290812	0.0119325	0.047355	0.018666	0.0107826	14.3536
2700062C07Rik	7.76026	8.83296	0.0679513	0.0869245	0.635652	0.544166	0.00246951	0.00321502	20.2832	30.6838	-0.0895815	-0.170386	0.567819	0.274665	-0.00729739	-0.0110212	4.14695	10.1219	-0.0516243	-0.133005	0.710838	0.337668	-0.00133994	-0.00487578	6.57956	11.2862	0.390059	0.0952731	0.00466136	0.506029	0.0139043	0.00393445	12.6681	21.0755	0.034992	-0.0902059	0.805471	0.524796	0.00155939	-0.00435042	10.5754	14.0854	0.245156	0.0895807	0.0967338	0.549304	0.0121686	0.00428518	5.42885
2700068H02Rik
2700069I18Rik									46.4511	380.006	0.107699	0.077246	0.491815	0.622474	0.0125652	0.00884137	44.9252	-161.761	-0.0762547	-0.120378	0.583663	0.385912	-0.0080502	-0.011586
2700078F05Rik									79.6052	101.667	-0.066409	-0.1201	0.672216	0.443007	-0.00616586	-0.00988969
2700089I24Rik
2700097O09Rik	11.2261	8.25163	-0.503761	-0.432045	0.000164227	0.00154609	-0.0199157	-0.0191702	18.6732	10.1706	0.00292962	-0.0957249	0.985125	0.541452	0.000176523	-0.00354731	6.87627	6.08477	-0.118107	-0.277458	0.395001	0.0422292	-0.00370325	-0.00723908	10.6592	8.58375	-0.142182	-0.446159	0.319602	0.00103268	-0.00529122	-0.0152611	7.97029	8.34391	0.0569294	-0.109028	0.688516	0.441657	0.00163276	-0.00427704	8.92775	6.03746	0.137104	-0.10679	0.358108	0.474948	0.00467391	-0.00320947	7.9173
2700099C18Rik									16.3039	15.4305	0.130808	0.107393	0.403102	0.493055	0.0088833	0.00515947	12.4302	17.2588	-0.0731265	-0.173562	0.599236	0.209433	-0.0038451	-0.00738093	86.2798	218.326	0.293485	0.240716	0.0365983	0.0888385	0.0361351	0.0261653	100.386	120.005	0.120552	0.0876813	0.394606	0.536509	0.0154201	0.00951035	34.4923	35.8239	0.195847	0.108177	0.187061	0.4692	0.0149236	0.00704023	87.1837
2810001G20Rik	16.9549	23.8914	-0.0556511	-0.0419225	0.698107	0.770216	-0.00308605	-0.00234054	18.0252	37.5869	0.148571	0.119019	0.341691	0.447155	0.0100667	0.00634287	6.33562	18.2244	0.0679638	-0.0227859	0.625331	0.87009	0.00245061	-0.00108523	13.5627	36.8847	-0.361189	-0.522273	0.00921396	8.45896e-05	-0.0177095	-0.0276793	14.5936	27.2589	-0.17575	-0.285404	0.212665	0.0402749	-0.00927346	-0.0151833	26.2038	55.4578	-0.0882568	-0.195829	0.555245	0.187102	-0.00729004	-0.0151734	13.6326
2810002D19Rik	16.47	14.2653	-0.220853	-0.224224	0.119374	0.113696	-0.0126287	-0.0118832	19.9274	20.8307	-0.0610845	-0.156139	0.697189	0.317381	-0.00451753	-0.00824137	6.89419	11.5395	-0.19945	-0.291839	0.148196	0.0322543	-0.00684112	-0.0103769	10.9895	15.3778	-0.14864	-0.360666	0.297883	0.00932328	-0.00659527	-0.0165651	10.0275	13.5949	-0.311257	-0.38537	0.0247003	0.00478358	-0.0125411	-0.0184509	12.4056	13.7416	0.181118	0.0160769	0.22309	0.914585	0.00861435	0.000730967	9.02196
2810004N23Rik	11.6403	6.84004	-0.189998	-0.190621	0.181739	0.180284	-0.00902279	-0.00827727	22.5578	13.6791	0.137569	0.106631	0.379017	0.496147	0.00929739	0.00557356	8.1852	10.6424	0.058967	-0.0399021	0.671897	0.774516	0.00184852	-0.00168731	8.06484	8.07766	-0.32055	-0.507411	0.0218297	0.000144523	-0.0108038	-0.0207736	5.87395	6.86605	-0.161166	-0.235988	0.253697	0.092134	-0.00486059	-0.0107704	20.0999	10.5143	0.161961	0.0317754	0.276749	0.832085	0.00937731	0.00149392	9.41914
2810013P06Rik	5.64329	5.88921	-0.503705	-0.43967	0.00016455	0.00124588	-0.0178549	-0.0171094	15.903	19.4495	0.00156245	-0.0556558	0.992066	0.722979	0.000110162	-0.00361367	4.31152	8.89912	-0.101815	-0.152437	0.463813	0.271152	-0.00286637	-0.00640221	8.8905	12.0569	-0.425501	-0.567108	0.00185351	1.43129e-05	-0.0205705	-0.0305403	6.05772	8.92624	-0.143044	-0.259199	0.311709	0.0635214	-0.004112	-0.0100218	6.90671	7.57299	0.109403	-0.0871701	0.464147	0.560145	0.00436196	-0.00352143	5.98072
2810021J22Rik	27.8107	15.7805	-0.25267	-0.279832	0.0736407	0.0467252	-0.0188358	-0.0180903	23.3705	15.7401	0.086414	0.0451412	0.581641	0.77378	0.00572563	0.0020018	7.43075	10.4249	0.0892209	-0.0147549	0.521147	0.915666	0.00295912	-0.000576713	12.6111	12.5813	0.285068	0.0282555	0.0426004	0.843967	0.0110925	0.00112271	34.6869	19.6014	0.151848	0.077441	0.282545	0.585286	0.00972517	0.00381536	13.2762	10.249	0.256631	0.0729052	0.0816324	0.626256	0.0107682	0.0028848	10.8255
2810025M15Rik	14.813	17.3888	-0.249649	-0.226062	0.0772713	0.110689	-0.0142513	-0.0135058	28.4004	49.8097	-0.00917061	-0.0488692	0.953458	0.755649	-0.000980242	-0.00470407	7.91297	21.0622	-0.159547	-0.173502	0.249159	0.209593	-0.00680226	-0.0103381	9.88597	15.7599	-0.0644257	-0.270215	0.653322	0.0551465	-0.00301464	-0.0129845	7.30176	12.5581	-0.178142	-0.247391	0.206408	0.0770281	-0.00683477	-0.0127446	20.2208	27.3387	0.265545	0.175733	0.0712307	0.237387	0.0193883	0.0115049	6.59218
2810029C07Rik																	7.54132	15.1251	-0.00756923	-0.0833047	0.956679	0.549253	-0.000285659	-0.00382149																									12.3409
2810030D12Rik	65.5704	98.8938	0.42114	0.427091	0.00208746	0.00177417	0.0335371	0.0342826
2810032G03Rik									315.046	-5028.82	0.239837	0.219543	0.121362	0.157202	0.0282122	0.0244884	7.6851	11.2619	-0.03013	-0.124003	0.828772	0.371661	-0.0010077	-0.00454353	52.0699	57.3026	0.727599	0.671027	1.46359e-09	7.10462e-08	0.0878054	0.0778356
2810039B14Rik	-716.51	31.957	-0.198086	-0.186327	0.1635	0.190482	-0.013831	-0.0130855	215.996	61.9379	0.0136998	-0.0276498	0.930518	0.860292	0.00143534	-0.0022885	25.9034	23.3227	0.219305	0.140312	0.11109	0.311553	0.00965298	0.00611715	171.878	47.6158	0.154936	0.00740109	0.277653	0.958891	0.0104302	0.000460321	-218.571	75.1776	0.191149	0.138012	0.174641	0.32921	0.0175253	0.0116155	9677.54	46.4123	0.00188976	-0.102325	0.989942	0.493715	0.000155976	-0.00772741	71.6117
2810049E08Rik
2810402E24Rik	13.9089	11.1286	-0.209001	-0.186523	0.141055	0.190008	-0.00955699	-0.00881147	35.5354	39.1881	0.205774	0.182385	0.185567	0.241766	0.0157373	0.0120135	26.7709	56.8498	0.279936	0.214787	0.0403489	0.118834	0.0171896	0.0136538	14.7144	17.7426	-0.255636	-0.464308	0.0702089	0.000598852	-0.0109166	-0.0208864	37.6944	36.1864	0.129091	0.0230579	0.361724	0.871107	0.00734641	0.00143661	32.7177	27.9623	0.279873	0.177032	0.056739	0.233883	0.0195408	0.0116574	16.4847
2810403D21Rik	-107.82	45.4779	-0.103491	-0.103951	0.469868	0.467887	-0.00970533	-0.00895981	58.3079	22.6481	0.0984755	0.0602137	0.529841	0.701304	0.0072373	0.00351347	185.149	75.9547	0.0262959	-0.0103781	0.850292	0.940628	0.00260702	-0.000928816	59.9118	19.1023	0.0863688	-0.163197	0.546753	0.252515	0.00356656	-0.00640329	-1388.92	33.3359	0.0664342	-0.00984517	0.63983	0.944774	0.00527043	-0.00063937	205.909	22.9276	0.20964	0.106622	0.157277	0.475649	0.0138236	0.00594018	71.5205
2810403G07Rik
2810404F17Rik
2810404M03Rik									139.663	-143.182	-0.0266063	-0.053496	0.865515	0.733327	-0.00391637	-0.00764021
2810405F17Rik	47.7264	80.4596	-0.0704017	-0.0625002	0.623487	0.663053	-0.00695347	-0.00620795	63.7022	-261.54	-0.155092	-0.205459	0.320679	0.186256	-0.0181438	-0.0218677	41.6219	-191.224	0.0697277	0.0343009	0.616362	0.805501	0.00707713	0.00354129	49.417	-1531	-0.106651	-0.207214	0.45634	0.144562	-0.0106391	-0.020609																	53.775
2810407A14Rik																	88.8682	417.937	0.145092	0.121444	0.295188	0.381688	0.0124083	0.00887245	111.739	99.5048	0.287846	0.184281	0.040536	0.195484	0.0233069	0.013337
2810408A11Rik	623.467	159.31	-0.349067	-0.350777	0.0120539	0.0116127	-0.03936	-0.0386145	84.2121	238.183	-0.0710815	-0.115714	0.650584	0.459957	-0.00801836	-0.0117422																	-130.791	-105.152	-0.24536	-0.294666	0.0795655	0.0339601	-0.0367343	-0.0426441	14.0181	13.5918	0.50528	0.398065	0.000291795	0.00558764	0.0277389	0.0198555	64.6642
2810408I11Rik									34.4932	53.2005	-0.147563	-0.224153	0.345014	0.148453	-0.0110653	-0.0147891																									27.9814	37.395	-0.0475209	-0.157643	0.751097	0.289928	-0.00275591	-0.0106393	-199.79
2810410L24Rik	204.594	74.0448	-0.0693271	-0.0665786	0.62881	0.642508	-0.00832284	-0.00757733									63.3228	21118.7	0.0364772	-0.0101645	0.793424	0.941848	0.00274033	-0.000795506	38.1729	45.2122	-0.0652039	-0.199586	0.649405	0.16027	-0.00508148	-0.0150513	729.456	293.234	0.358039	0.296559	0.00915752	0.0327763	0.035585	0.0296752	53.5062	43.9984	0.389256	0.30449	0.00684453	0.0374372	0.0301146	0.0222312	71.4945
2810414N06Rik	10.5561	11.9617	0.214852	0.223415	0.130012	0.115039	0.0110023	0.0117478	79.2712	-595.225	0.114076	0.101122	0.466376	0.518784	0.0151716	0.0114477	21.5718	139.976	0.133227	0.0769998	0.336856	0.57998	0.00888942	0.00535358	9.36133	17.001	-0.363465	-0.504951	0.00875082	0.000157551	-0.0162399	-0.0262097	28.3633	58.2843	-0.0199575	-0.104624	0.888319	0.460428	-0.00134677	-0.00725657									15.5655
2810428J06Rik	-109.236	-446.971	0.0156275	0.0238219	0.913328	0.868214	0.00165159	0.0023971	47.7523	77.0093	-0.0575362	-0.13161	0.71401	0.400202	-0.00396269	-0.00768652	28.5529	62.9228	-0.0519919	-0.109188	0.70887	0.431899	-0.00361022	-0.00714605	216.935	-442.442	0.100779	-0.017176	0.481646	0.904777	0.00861051	-0.00135933	782.436	728.105	0.094128	0.0439508	0.506855	0.757033	0.0103808	0.00447097	146.177	140.774	0.0789989	-0.00563443	0.597616	0.970016	0.00737946	-0.000503926	96.6268
2810429I04Rik									-788.109	96.1747	-0.0277841	-0.0587062	0.85962	0.708448	-0.00335818	-0.00708201	39.8956	23.3741	0.234345	0.198128	0.0880779	0.150958	0.0137619	0.0102261																	-77.7407	407.806	0.263522	0.215363	0.0734942	0.145997	0.038147	0.0302636	-66.6762
2810430I11Rik									-327.415	-203.269	0.0496889	0.0292371	0.751679	0.852358	0.00834789	0.00462406									360.1	874.837	0.0926515	-0.00381605	0.517856	0.978797	0.0095693	-0.00040054
2810433D01Rik
2810442N19Rik									118.087	-150.469	0.284276	0.284371	0.064673	0.064579	0.0500105	0.0462867
2810454H06Rik	138.186	52.3213	-0.428263	-0.437169	0.00171764	0.00133805	-0.0392383	-0.0384928	44.2303	48.7181	0.0450606	-0.00202679	0.774173	0.989708	0.00358658	-0.00013725	62.8435	237.575	0.163223	0.136718	0.238278	0.324231	0.0150492	0.0115134	62.9378	80.4699	-0.267934	-0.433246	0.057313	0.0014949	-0.0193652	-0.029335	131.913	82.602	-0.159269	-0.256562	0.259403	0.06636	-0.0118047	-0.0177145	378.319	202.371	0.212833	0.153702	0.150906	0.302308	0.0273519	0.0194685	135.538
2810455O05Rik																	12.6033	37.566	0.0178134	-0.0488429	0.898269	0.725789	0.000831889	-0.00270394
2810459M11Rik									-591.821	-263.368	0.166423	0.145404	0.286148	0.352196	0.0254877	0.0217638	7.40054	11.3663	0.353237	0.209722	0.00879122	0.127995	0.0127773	0.00924143	74.6998	84.3943	-0.20768	-0.277502	0.143642	0.0486618	-0.0292165	-0.0391864									7.3415	6.67071	0.144742	-0.0464866	0.331695	0.756346	0.00600845	-0.00187493	1031.39
2810471M01Rik
2900005J15Rik	15.458	11.5238	0.0168009	0.032316	0.906847	0.821886	0.000954125	0.00169964	38.5511	42.623	0.132139	0.106938	0.398295	0.494899	0.0120932	0.00836933	18.0272	31.473	0.195384	0.127358	0.156814	0.358761	0.0104857	0.00694989	8.44776	9.09945	0.294254	0.0307764	0.036087	0.830244	0.0110996	0.00112973	59.1789	55.6812	0.0358038	-0.0451055	0.801049	0.750853	0.00253724	-0.00337256	24.3627	19.4611	0.315738	0.24176	0.0306226	0.101593	0.0221252	0.0142418	16.3028
2900009J06Rik
2900018N21Rik
2900022M07Rik																	17.6231	42.0495	-0.139632	-0.189599	0.313928	0.169705	-0.012781	-0.0163168
2900026A02Rik	19.9882	7.7983	-0.170417	-0.17111	0.231846	0.229924	-0.00830921	-0.00756369	33.0643	15.3496	0.218119	0.241279	0.15998	0.119072	0.0211654	0.0174416	5.80039	6.36089	-0.0568151	-0.138229	0.683226	0.318863	-0.00153487	-0.0050707	8.55142	5.93913	-0.220509	-0.4913	0.119965	0.000251362	-0.00856913	-0.018539	6.94199	6.22646	-0.161673	-0.255544	0.252188	0.0674823	-0.00475659	-0.0106664	4.11529	4.26791	-0.15453	-0.301173	0.299678	0.0396696	-0.00445393	-0.0123373	7.51313
2900027M19Rik									297.942	196.126	-0.0583422	-0.0901934	0.710176	0.565167	-0.00824896	-0.0119728	43.3007	48.0122	-0.0429622	-0.082478	0.757731	0.553237	-0.00485258	-0.00838842
2900035J10Rik
2900037B21Rik																	19.3963	263.678	-0.113455	-0.150772	0.414012	0.276484	-0.0121724	-0.0157082
2900041M22Rik																	54.6867	-99.302	0.244392	0.183161	0.0749128	0.184937	0.0179482	0.0144123
2900042G08Rik
2900042K21Rik
2900045O20Rik																	99.4518	-71.6189	0.107707	0.0803908	0.43821	0.563357	0.0124717	0.00893587
2900052L18Rik	35.3439	37.0918	-0.028609	-0.0216842	0.84204	0.879948	-0.00283775	-0.00209224	81.854	-2138.71	-0.0474628	-0.0826206	0.762474	0.59839	-0.00608091	-0.00980475	16.5107	44.0831	0.344291	0.279061	0.0107948	0.0410052	0.0217425	0.0182067	9.7988	15.7974	0.0424285	-0.153483	0.767519	0.282239	0.00198465	-0.00798519	26.4626	47.1082	0.115137	0.0245975	0.416338	0.862581	0.00777687	0.00186707	24.4026	32.8473	0.271742	0.185706	0.0646392	0.211387	0.0227386	0.0148552	18.8171
2900052N01Rik	2177.22	73.1966	-0.181281	-0.179603	0.202985	0.20727	-0.015304	-0.0145585									5.10842	8.00632	0.393163	0.212021	0.00327176	0.123772	0.0111773	0.00764143
2900060B14Rik
2900060N12Rik									-670.264	-922.133	0.192566	0.16538	0.216032	0.28922	0.0213822	0.0176583	19.9049	25.6216	-0.0128928	-0.0857324	0.926277	0.537633	-0.000655239	-0.00419107
2900064K03Rik																	16.88	19.8956	-0.160544	-0.222351	0.246177	0.106093	-0.0135152	-0.017051									-399.204	-1176.68	0.179952	0.156575	0.201757	0.267652	0.0261503	0.0202405
2900072N19Rik																	5.96495	16.3282	-0.139866	-0.180014	0.313108	0.19273	-0.00555567	-0.00909151
2900076A07Rik	27.7596	25.8371	0.240557	0.248597	0.0890551	0.0785675	0.014387	0.0151325	32.3943	43.7143	0.00583829	-0.0416314	0.97036	0.790959	0.000559339	-0.00316449	10.6511	25.2356	-0.0805451	-0.146798	0.562605	0.289485	-0.00322685	-0.00676268	11.5003	16.4034	-0.124296	-0.37299	0.384836	0.00702444	-0.00507398	-0.0150438	6.44158	10.2593	0.0541961	-0.0805108	0.702763	0.570455	0.00188771	-0.0040221	26.2226	31.2212	-0.141701	-0.26684	0.34206	0.0698108	-0.0101622	-0.0180456	21.9074
2900078I11Rik
2900079G21Rik									180.506	64.2203	-0.0761721	-0.119078	0.627335	0.446925	-0.00767008	-0.0113939	15.9552	12.5121	0.0244227	-0.0735483	0.860847	0.597126	0.000982764	-0.00255307
2900089D17Rik	1134.24	159.918	0.16597	0.170685	0.244434	0.2311	0.0203809	0.0211264																	120.428	578.779	0.231482	0.135224	0.102172	0.344095	0.0224621	0.0124922
2900092C05Rik
2900092N22Rik									71.5616	-1409.01	0.2367	0.230073	0.126459	0.137748	0.0296817	0.0259579	22.2769	66.2994	-0.137352	-0.196652	0.321973	0.154088	-0.0113202	-0.0148561									70.7063	490.726	-0.0463316	-0.122244	0.744306	0.387955	-0.00433859	-0.0102484									60.8411
2900093K20Rik																	31.6825	-105.673	0.331464	0.293289	0.0143488	0.0313678	0.0338341	0.0302982																									39.3999
3000002C10Rik									57.2341	48.0423	-0.0179994	-0.0681595	0.908793	0.66408	-0.00170031	-0.00542414	11.6633	15.1885	-0.0346205	-0.130959	0.803725	0.34522	-0.00125016	-0.00478599	159.91	123.434	0.156495	0.0464759	0.272788	0.746051	0.0136468	0.00367694	144.261	54.6463	-0.0505283	-0.146348	0.722039	0.300545	-0.00395582	-0.00986562	155.691	54.4065	0.292907	0.205314	0.0457106	0.166217	0.0211715	0.0132881	42.8268
3010001F23Rik																	21.2234	91.597	-0.183481	-0.238134	0.184158	0.0829158	-0.0107389	-0.0142748
3010003L21Rik									76.6141	-5480.19	0.0815052	0.0513081	0.603355	0.743856	0.00894972	0.00522589																									45.2657	74.0198	-0.18739	-0.275071	0.207201	0.061305	-0.0174828	-0.0253662	58.5267
3100003L05Rik
3110001I22Rik	28.8783	31.9189	-0.149331	-0.129897	0.295618	0.363607	-0.0109618	-0.0102163	45.9351	112.193	-0.275952	-0.391948	0.0732657	0.00933961	-0.0281316	-0.0318555	24.838	231.951	0.183852	0.126594	0.183256	0.361672	0.0113366	0.00780075	40.4251	134.881	0.0549622	-0.074884	0.70167	0.601493	0.00427169	-0.00569816	77.4168	459.046	-0.0519758	-0.130323	0.714411	0.357122	-0.00394169	-0.00985149	25.3655	40.795	-0.115884	-0.224208	0.437933	0.129757	-0.00746162	-0.015345	36.8122
3110004A20Rik
3110006O06Rik
3110009E18Rik	-130.974	-279.604	0.0643231	0.0682794	0.653839	0.634017	0.00895652	0.00970203	77.155	621.036	-0.000119865	-0.0617667	0.999391	0.693971	-8.93857e-06	-0.00373277	91.3767	-140.428	0.215962	0.192133	0.116781	0.163966	0.0195056	0.0159698	84.3153	447.35	0.069909	-0.0588343	0.625925	0.681733	0.00544703	-0.00452282	-213.908	-146.604	0.115808	0.0739292	0.41361	0.60246	0.0141131	0.00820326									1073.05
3110009F21Rik
3110009M11Rik
3110015C05Rik
3110021N24Rik									1225.04	-107.058	0.210135	0.194659	0.176216	0.210988	0.0301879	0.0264641	21.3446	78.5768	0.250546	0.185297	0.0676528	0.179778	0.0157586	0.0122228	211.911	-120.672	-0.044971	-0.144193	0.754012	0.312735	-0.00419371	-0.0141636
3110039M20Rik																	21.5248	497.09	-0.0648109	-0.111132	0.641497	0.423697	-0.00473127	-0.0082671
3110040N11Rik	8.74826	9.96088	0.0767425	0.0964981	0.592474	0.50055	0.00319854	0.00394406	19.6932	28.9517	0.0533237	0.0144458	0.734154	0.926745	0.00474881	0.00102498	7.2868	19.7613	-0.170989	-0.204127	0.216371	0.138723	-0.00663436	-0.0101702	4.86279	9.44082	0.101549	-0.183027	0.478286	0.198595	0.00295216	-0.00701768	6.44541	13.7066	0.167695	-0.0128618	0.234713	0.927892	0.00529226	-0.000617543	7.27237	9.51825	0.293377	0.0996795	0.045348	0.505008	0.0116848	0.00380145	5.16094
3110045C21Rik									64.2046	-384.352	0.0203683	-0.010947	0.89685	0.944455	0.00252384	-0.00119999	43.4878	-182.458	0.146838	0.1211	0.289353	0.383049	0.0154052	0.0118694	34.3645	231.516	-0.0845625	-0.21447	0.555201	0.130712	-0.00696646	-0.0169363	50.3366	536.988	0.0422688	-0.0292101	0.766063	0.837134	0.00358655	-0.00232325	133.471	-138.858	-0.115338	-0.188271	0.440109	0.205035	-0.0127929	-0.0206762	11.6756
3110053B16Rik	406.438	167.811	0.299552	0.299174	0.0327199	0.0329511	0.0314077	0.0321532									11.218	24.3565	0.0692031	-0.00506838	0.619024	0.970985	0.00323752	-0.000298316	60.2253	210.295	0.208474	0.0790812	0.142084	0.581211	0.0162923	0.00632244
3110056K07Rik	23.1479	15.4137	-0.363918	-0.370108	0.0086611	0.00751248	-0.0203833	-0.0196378	29.4118	24.6114	0.03158	-0.0201285	0.840674	0.898058	0.00255997	-0.00116386	12.0673	17.6966	-0.0984839	-0.179637	0.478637	0.19368	-0.00421748	-0.00775332	15.5868	19.119	-0.29176	-0.473454	0.0377677	0.000449817	-0.0128459	-0.0228157	26.6906	25.4026	0.00105563	-0.100996	0.994074	0.476211	5.64825e-05	-0.00585332	24.4765	19.702	0.0732043	-0.0627638	0.624837	0.675133	0.00445278	-0.00343061	17.4407
3110062G12Rik																	83.6719	-97.9289	-0.168582	-0.214163	0.223004	0.119934	-0.0200627	-0.0235985
3110067C02Rik																	115.519	-86.2017	-0.122326	-0.170979	0.378214	0.216398	-0.0114507	-0.0149865
3110070M22Rik	60.8996	107.38	0.277338	0.27818	0.0488007	0.048092	0.0324318	0.0331773									68.4038	-141.512	0.155544	0.122268	0.261389	0.378443	0.0208007	0.0172649									110.162	-291.839	0.339603	0.285317	0.0137754	0.0403381	0.0416026	0.0356928	49.2454	195.304	0.250249	0.173927	0.0897842	0.242319	0.0269431	0.0190597	80.3637
3110080E11Rik									38.2516	45.2888	0.238519	0.183271	0.123484	0.239446	0.0197715	0.0160476	20.2091	23.4223	-0.0449594	-0.0968858	0.746835	0.485837	-0.00377581	-0.00731164									1868.04	206.271	0.20156	0.179458	0.15189	0.203019	0.0250499	0.0191401									-3912.88
3110080O07Rik									37.0696	432.212	0.0436044	0.00556304	0.781289	0.971757	0.00421057	0.000486739	35.9448	-11046.4	0.0749958	0.0480096	0.589908	0.730289	0.0084403	0.00490447																	74.5058	-520.08	0.225236	0.177091	0.12796	0.233724	0.0270483	0.0191649	92.609
3110082I17Rik	28.6989	21.8853	0.323408	0.302131	0.0206166	0.0311779	0.017265	0.0180105	24.1016	23.0962	0.114479	0.091351	0.464795	0.560165	0.0107683	0.0070445	10.1028	18.4412	0.272026	0.148168	0.046602	0.28496	0.0115035	0.0079677	11.2092	12.2574	0.334486	0.0919302	0.016438	0.521134	0.0135182	0.00354834	17.2079	20.6501	0.101908	-0.0249764	0.472213	0.860485	0.00451922	-0.00139058	27.5747	23.8353	0.25901	0.177864	0.0787471	0.231657	0.0206805	0.0127971	16.6134
3110082J24Rik																	18.7175	674.865	-0.325591	-0.351232	0.0162846	0.00920963	-0.0229578	-0.0264936
3110083C13Rik																																																	74.2132
3110099E03Rik									166.44	439.276	0.123775	0.096157	0.429073	0.53962	0.0179116	0.0141878																																	39.2998
3200001D21Rik									149.857	-6393.75	-0.145776	-0.174693	0.35095	0.262532	-0.020888	-0.0246118	174.794	-155.416	0.115231	0.102416	0.406695	0.461163	0.0170115	0.0134757
3222401L13Rik	-120.142	91.6764	-0.25779	-0.264741	0.0677969	0.0604619	-0.0311642	-0.0304187	174.909	63.6623	0.277264	0.262027	0.0718546	0.0896226	0.0264289	0.0227051	31.7754	27.1209	0.579562	0.576041	4.38796e-06	5.17148e-06	0.0371513	0.0336155	170.027	53.2147	0.339096	0.26008	0.0149249	0.0653064	0.0291553	0.0191855	22.0583	13.4237	0.147891	0.00204805	0.295423	0.988503	0.00600173	9.19226e-05	-76.5513	-1190.8	0.232496	0.18511	0.115804	0.212882	0.0299274	0.0220441	-13670.6
3300002A11Rik
3300002I08Rik									35.6234	53.5304	0.202697	0.20023	0.192374	0.19796	0.0169143	0.0131904	18.6616	35.0808	-0.0295804	-0.0956294	0.831849	0.491538	-0.00190368	-0.00543951	25.8562	36.9435	0.117993	-0.0284672	0.409579	0.842813	0.00818623	-0.00178361	57.275	66.0116	0.136535	0.0811371	0.334462	0.567451	0.0114367	0.00552693	9.65044	14.1694	0.216889	0.011392	0.143093	0.93942	0.00846242	0.000579031	38.7593
3300005D01Rik
3425401B19Rik									47.4623	34.3799	0.484042	0.531613	0.00100643	0.000244064	0.0719452	0.0682214																	6.21369	6.55886	0.103941	-0.0244727	0.463377	0.863272	0.00456783	-0.00134197
3632454L22Rik									222.465	128.318	0.00995363	-0.0219714	0.949489	0.888781	0.00116408	-0.00255975	27.4007	26.6712	-0.00742677	-0.0730433	0.957494	0.599653	-0.000482213	-0.00401805
3732407C23Rik																	-356.321	-101.356	0.124864	0.111417	0.368324	0.422502	0.0183797	0.0148438
3830403N18Rik									67.5878	-428.684	-0.044534	-0.0784547	0.776744	0.617023	-0.00632666	-0.0100505
3830406C13Rik	8.816	5.40892	-0.313203	-0.355039	0.0252277	0.0105727	-0.0132132	-0.0124677	15.861	10.3608	0.14655	0.130542	0.348372	0.404069	0.00977874	0.00605491	4.51783	6.31739	-0.192099	-0.256073	0.164043	0.0616213	-0.00488156	-0.0084174	3.7501	5.02577	-0.142718	-0.435591	0.317761	0.00139926	-0.00297731	-0.0129472	5.83456	5.69353	-0.1187	-0.294664	0.401962	0.0339616	-0.00302762	-0.00893743	7.05196	5.16842	0.389482	0.178362	0.00680939	0.230329	0.0132593	0.00537596	4.09711
3830408C21Rik	1645.99	39.6118	-0.0378063	-0.029104	0.792249	0.839343	-0.00286461	-0.0021191	53.3118	31.34	0.024323	-0.0295781	0.876964	0.850655	0.00198015	-0.00174368	14.7569	13.8124	0.21077	0.157283	0.126056	0.256028	0.0093063	0.00577046	26.0458	21.1301	-0.0166878	-0.213104	0.907472	0.13324	-0.000856955	-0.0108268	90.9478	30.6799	0.053061	-0.0454238	0.708709	0.749151	0.00346091	-0.00244889	-140.18	157.578	0.371918	0.292022	0.0100486	0.0463995	0.0309053	0.0230219	818.869
3830422I06Rik
3830432H09Rik																																	-97.5448	-88.478	0.322985	0.310093	0.0195206	0.0252721	0.0543667	0.0484569
3930402G23Rik	1648.92	137.093	-0.475537	-0.452377	0.000420967	0.000859721	-0.0760116	-0.0752661																	-394.095	-228.372	0.341401	0.276791	0.0142141	0.0492657	0.0443393	0.0343694
4631405J19Rik	-68.3084	-189.387	-0.00634148	-0.000681507	0.964773	0.996213	-0.000834502	-8.89893e-05	35591.6	-607.555	-0.10144	-0.142094	0.517464	0.36338	-0.012792	-0.0165158																	25.0057	23.5038	-0.449274	-0.484351	0.000834587	0.000274393	-0.0253725	-0.0312823									-107.508
4631422I05Rik
4632404H12Rik	19.8032	11.6568	-0.393154	-0.348304	0.00431739	0.0122555	-0.0193085	-0.018563	52.9506	24.2974	0.0942223	0.0745296	0.547847	0.634799	0.00769483	0.00397099	7.69069	9.80747	0.0315597	-0.0646555	0.820777	0.642298	0.000984758	-0.00255108	29.763	21.2245	-0.254716	-0.442553	0.0712595	0.00114675	-0.0134139	-0.0233838	15.5164	12.5031	0.150634	-0.00506311	0.286455	0.971583	0.00567151	-0.000238289	22.5654	12.1082	0.352813	0.236008	0.0149983	0.110249	0.0185671	0.0106837	14.5838
4632404M16Rik																																	14.594	15.5357	-0.296066	-0.361086	0.0330813	0.00854061	-0.0176061	-0.0235159
4632411P08Rik																																									-105.905	-136.424	0.112102	0.0564188	0.453132	0.706417	0.0150109	0.00712751
4632415L05Rik	27.3868	10.5831	-0.291786	-0.306164	0.03775	0.0288883	-0.0133425	-0.012597	39.9951	18.9011	0.00574389	-0.0653771	0.970839	0.67703	0.000433606	-0.00329023	7.65911	9.83752	0.0401194	-0.0523764	0.773321	0.706814	0.00130307	-0.00223276	15.4941	9.61561	0.212267	-0.0286125	0.134808	0.842021	0.00898673	-0.000983113	18.1172	12.4669	-0.0196568	-0.152245	0.889992	0.281275	-0.000723765	-0.00663357	14.5372	9.21262	-0.0137768	-0.205906	0.92677	0.164972	-0.000586135	-0.00846952	10.6305
4632418H02Rik	28.7828	23.0998	0.0352814	0.0436442	0.805845	0.761052	0.00271425	0.00345976	60.5823	101.844	-0.298535	-0.393074	0.051831	0.00912071	-0.0250919	-0.0288157	41.9626	88.8286	0.092782	0.0646223	0.504584	0.642469	0.00918681	0.00565098	18.1646	21.6778	-0.100743	-0.290779	0.481801	0.0384466	-0.00551433	-0.0154842	35.2043	36.0435	0.153561	0.0531497	0.277086	0.708244	0.00919845	0.00328865	388.571	350.381	0.0438886	-0.0123643	0.76958	0.93426	0.0062396	-0.00164379	282.39
4632427E13Rik	14.5339	8.82512	-0.242142	-0.231667	0.086906	0.101891	-0.0141042	-0.0133587	14.6707	8.82522	-0.0985536	-0.204795	0.529513	0.187714	-0.00708755	-0.0108114	7.85421	6.37485	-0.0341836	-0.130727	0.806154	0.34608	-0.00152107	-0.0050569	6.70355	4.58091	-0.103895	-0.495664	0.468128	0.000216957	-0.0032698	-0.0132396	6.05184	4.73392	-0.0425207	-0.248502	0.764709	0.0756681	-0.00107222	-0.00698202	5.54021	3.62106	0.273222	0.00752397	0.0631396	0.959968	0.00807949	0.000196102	6.34823
4632428C04Rik									209.632	-265.347	0.099184	0.0822637	0.52687	0.599977	0.0110727	0.00734888																	58.7243	69.1032	0.160512	0.0949089	0.255654	0.503321	0.0153917	0.00948187	119.116	158.384	0.349127	0.267108	0.0161607	0.0695199	0.0322989	0.0244155	482.032
4632432E15Rik
4633401B06Rik	19.9777	27.1004	-0.0675161	-0.0560814	0.637822	0.695886	-0.0049914	-0.00424589	26.1739	104.974	0.153988	0.105021	0.324177	0.502708	0.0125587	0.00883485	32.793	612.618	0.022604	-0.0115746	0.871118	0.933797	0.00238203	-0.0011538	24.7645	97.6387	-0.0867163	-0.25788	0.545134	0.067698	-0.00598315	-0.015953	18.2993	34.3774	0.175201	0.0816298	0.214119	0.565093	0.0105453	0.00463548	15.1548	24.1187	0.37976	0.271212	0.00846735	0.0651838	0.0249901	0.0171067	20.4473
4731419I09Rik																									218.058	-2956.41	0.172042	0.0749963	0.227359	0.600946	0.0173451	0.00737521	-97.2319	-99.9925	0.1014	0.0581084	0.474435	0.682403	0.0132782	0.00736844
4732414G09Rik																	123.08	-80.882	0.140323	0.101491	0.311515	0.465243	0.0112147	0.00767883
4732416N19Rik									139.351	174.541	0.0667213	0.0341059	0.670762	0.828115	0.00650225	0.00277842	152.124	-257.62	0.0346445	-0.00451589	0.803591	0.974146	0.00314506	-0.000390772	580.934	2022.99	0.273406	0.190064	0.0522258	0.181585	0.0296526	0.0196827									348.558	126.081	0.361646	0.290359	0.0124988	0.0477169	0.0355235	0.0276402	-222.007
4732419C18Rik	30.7605	19.1006	0.378228	0.403163	0.00620775	0.00335274	0.0257607	0.0265062																																	251.335	98.0724	0.126646	0.0301161	0.396281	0.840737	0.0103293	0.00244588
4732440D04Rik	18.0595	10.7957	-0.301754	-0.298969	0.0313996	0.033077	-0.0176217	-0.0168762	25.6906	13.8132	0.120172	0.0939904	0.442733	0.548837	0.00766914	0.00394531	14.4131	14.1842	-0.254278	-0.347664	0.0635307	0.00999729	-0.0121114	-0.0156472	26.4942	19.4376	-0.226382	-0.420878	0.110171	0.00210233	-0.0132928	-0.0232626	19.1575	12.8972	-0.0389813	-0.162194	0.783801	0.250641	-0.00183927	-0.00774907	15.6722	11.035	-0.152316	-0.322738	0.306741	0.0269263	-0.00657608	-0.0144595	12.4346
4732463B04Rik	517.872	115.469	0.251918	0.253414	0.0745315	0.072767	0.0327095	0.033455									93.4888	-184.751	0.269128	0.226774	0.049082	0.0991458	0.0208302	0.0172943	497.739	-855.836	0.0284045	-0.0464562	0.843155	0.746155	0.00390679	-0.00606306									28.9159	29.4057	0.0972179	-0.0144559	0.515635	0.92317	0.0067913	-0.00109209	16.133
4732465J04Rik									55.8827	58.2163	0.0576876	0.0169646	0.713289	0.914017	0.00490574	0.00118191																																	46.5356
4732471J01Rik	18.2262	9.92435	-0.0971975	-0.0982057	0.497436	0.492964	-0.00510514	-0.00435963	158.494	119.958	0.16764	0.141393	0.282587	0.365777	0.0175909	0.0138671	12.5312	12.8346	0.0571586	-0.0345407	0.681413	0.804168	0.00233132	-0.00120451	13.5353	12.1569	-0.247172	-0.483541	0.0803523	0.000324994	-0.0113013	-0.0212712	701.641	79.7115	-0.0830291	-0.168343	0.558421	0.232884	-0.00698355	-0.0128934	1133.44	90.9838	-0.0183062	-0.108742	0.902795	0.466869	-0.00163699	-0.00952037	80.1476
4732487G21Rik									390.479	-291.51	-0.306492	-0.344533	0.0456108	0.0236698	-0.0364753	-0.0401991	87.6075	-317.34	-0.0556236	-0.0975415	0.68953	0.482876	-0.00546934	-0.00900517
4732490B19Rik									-322.481	-107.571	0.0982412	0.0667817	0.530825	0.670481	0.0127697	0.00904591
4732491K20Rik	84.9104	41.3279	0.189241	0.190811	0.183517	0.179841	0.0145568	0.0153023									15.133	21.5803	0.240176	0.17764	0.0802334	0.198762	0.0122922	0.00875634	101.997	132.681	0.321815	0.24376	0.0212856	0.0847535	0.0339921	0.0240222	14.6579	15.252	-0.111711	-0.236661	0.430433	0.0911833	-0.00404199	-0.00995179									16.4636
4732496C06Rik									37.7073	43.3738	-0.0902636	-0.145939	0.564863	0.350409	-0.0103498	-0.0140736	11.0541	14.8659	-0.0129667	-0.0827761	0.925856	0.551799	-0.000714	-0.00424983	22.2861	28.7506	0.127096	-0.037773	0.374135	0.792427	0.00775791	-0.00221193	52.3898	60.8841	-0.361547	-0.441567	0.0084505	0.00104927	-0.0227651	-0.0286749	218.324	281.989	0.144122	0.0819442	0.333792	0.583983	0.0170745	0.00919111	21.2558
4831440D22Rik									56.0633	75.2096	0.0642319	0.0234712	0.682387	0.881241	0.00544451	0.00172068	42.401	94.8276	0.0385701	-0.00365519	0.781855	0.979073	0.00327285	-0.000262981	274.018	-1615.56	0.229479	0.143101	0.105259	0.316452	0.0234179	0.013448	-992.351	19788.4	0.018175	-0.0281412	0.898239	0.843018	0.00252295	-0.00338686									451.034
4833403J16Rik
4833405L11Rik
4833407H14Rik									18.7667	24.1272	0.0866253	0.0584959	0.580714	0.709446	0.00973938	0.00601555									265.214	-146.625	0.556388	0.517517	2.24075e-05	0.00010068	0.0860093	0.0760394									17.6682	26.2132	-0.133203	-0.210112	0.372076	0.156323	-0.0104346	-0.018318
4833411C07Rik	220.497	140.894	-0.55548	-0.536115	2.32587e-05	5.02021e-05	-0.0855419	-0.0847964	106.145	-2174.44	0.0331753	-0.00371625	0.832737	0.981131	0.00335549	-0.000368341	133.675	-114.779	0.168171	0.161514	0.224152	0.243295	0.01933	0.0157941	966.974	-158.248	-0.0894822	-0.171156	0.532337	0.229797	-0.0105079	-0.0204777																	135.909
4833412C05Rik																	64.2803	-120.522	-0.0927117	-0.134813	0.504909	0.331083	-0.0102929	-0.0138287
4833412C15Rik	46.0293	37.3775	-0.028057	-0.0193556	0.84505	0.89276	-0.00213964	-0.00139413	47.6188	90.9929	-0.118076	-0.188732	0.450788	0.22549	-0.011432	-0.0151559	14.2999	20.1653	-0.000471271	-0.0606836	0.997301	0.66291	-3.22298e-05	-0.00356806	23.647	37.0329	-0.0873266	-0.235014	0.542298	0.0969006	-0.00587638	-0.0158462	37.4661	43.6526	0.110667	0.0376976	0.434784	0.790757	0.0085176	0.0026078	229.348	7355.64	0.066244	-0.00106743	0.658197	0.994318	0.00777019	-0.000113198	106.822
4833412K13Rik	-1632.37	-341.055	-0.192332	-0.186242	0.176331	0.190688	-0.027407	-0.0266615	35.3981	115.776	0.0425374	-0.0038118	0.786514	0.980646	0.00347588	-0.000247951	28.0533	86.9141	-0.077066	-0.122739	0.579653	0.376593	-0.00760401	-0.0111398	31.5036	102.718	0.154563	0.0137858	0.278826	0.92351	0.0108588	0.000888999	79.7047	479.658	-0.00944467	-0.0754638	0.947018	0.594928	-0.000946135	-0.00685594	68.7148	168.032	-0.0164942	-0.0853006	0.912377	0.56862	-0.00206359	-0.00994697	41.3757
4833413E03Rik
4833413G10Rik	172.334	133.732	-0.0891397	-0.0818455	0.533913	0.568025	-0.0086386	-0.00789309									62.0772	-171.656	-0.149581	-0.185408	0.280338	0.179512	-0.0134257	-0.0169616																	577.321	-360.708	0.125127	0.0678929	0.402015	0.650232	0.0171072	0.00922386	33.5855
4833415N18Rik									53.8697	1154.04	0.213355	0.211703	0.169531	0.172937	0.0259205	0.0221967	21.5916	511.711	0.240981	0.182165	0.0791943	0.187378	0.0157614	0.0122256
4833417C18Rik	105.19	226.278	-0.123352	-0.117856	0.388484	0.410127	-0.0146226	-0.0138771	36.9606	256.21	0.234295	0.202793	0.130472	0.19216	0.0202215	0.0164977	59.6989	-94.3137	0.191841	0.149497	0.164622	0.280613	0.0189552	0.0154194	105.843	-101.049	0.0666415	-0.0361607	0.642194	0.801103	0.00654754	-0.00342231									6413.72	-101.274	-0.181135	-0.242663	0.223045	0.100283	-0.0262895	-0.0341729
4833418N02Rik	-489.532	234.866	0.200224	0.204846	0.15891	0.149311	0.0248542	0.0255997	59.9024	88.0746	0.15285	0.132578	0.32781	0.396714	0.0136649	0.00994102	230.427	-132.698	0.136878	0.10731	0.323661	0.43991	0.0156629	0.0121271	46.8769	62.9685	0.090621	-0.0350884	0.52711	0.806887	0.00733078	-0.00263907									14.9589	16.3711	-0.0260112	-0.165023	0.862218	0.267648	-0.00130756	-0.00919095	18.2224
4833420G17Rik	10.0667	6.06241	-0.363225	-0.387488	0.00879855	0.00496519	-0.0139463	-0.0132007	16.8258	12.6495	-0.0388161	-0.101975	0.80481	0.515248	-0.0033335	-0.00705733	3.30362	5.21409	-0.0123478	-0.123656	0.929386	0.373011	-0.000252861	-0.00378869	5.26777	4.5983	0.0192443	-0.351881	0.893373	0.0113352	0.000545308	-0.00942454	7.66596	6.98474	-0.190883	-0.32943	0.175252	0.0170886	-0.00609016	-0.012	4.91421	3.17062	0.430057	0.21854	0.00255225	0.14	0.01287	0.00498663	4.23478
4833421G17Rik	13.662	17.4655	-0.19221	-0.192072	0.176612	0.176928	-0.0134728	-0.0127273	12.9603	19.0365	-0.0117438	-0.0755993	0.940419	0.629934	-0.000906672	-0.00463051	8.41592	15.2629	-0.211908	-0.318392	0.123977	0.0189574	-0.0118629	-0.0153987	7.70992	13.1067	-0.0643141	-0.285794	0.653884	0.0420525	-0.00298659	-0.0129564	19.0403	39.306	-0.181635	-0.268098	0.197503	0.0546531	-0.0135102	-0.01942	13.7898	22.2617	0.351359	0.266034	0.0154481	0.0706914	0.0225062	0.0146228	7.50695
4833421K07Rik
4833422C13Rik									91.0879	56.2803	-0.266698	-0.310095	0.0838465	0.0430014	-0.0305799	-0.0343037	11.4627	12.4177	0.00774315	-0.0927031	0.955685	0.504948	0.000251206	-0.00328463	-174.696	279.979	0.179155	0.0769064	0.208424	0.591681	0.0157873	0.00581743	228.755	34.5116	0.256308	0.195684	0.0666381	0.164444	0.0173193	0.0114095	41.5697	24.4205	-0.182255	-0.26596	0.220149	0.0707727	-0.011474	-0.0193574	40.9949
4833422M21Rik									192.512	79.5315	0.140271	0.113172	0.369634	0.469941	0.0143266	0.0106028	273.497	258.851	0.114361	0.0997126	0.410269	0.473139	0.0147234	0.0111875
4833427F10Rik
4833428L15Rik
4833439L19Rik	3.2043	2.94643	0.0199406	0.0428428	0.889539	0.765313	0.000629337	0.00137485	13.6489	11.5147	0.0452535	0.00956233	0.773232	0.951472	0.00447971	0.00075588	2.12884	4.03863	-0.255494	-0.247806	0.0622319	0.0708117	-0.00550843	-0.00904427	2.23982	3.7626	-0.194784	-0.416964	0.170778	0.00233574	-0.00401318	-0.013983	2.80869	4.52375	-0.159777	-0.236737	0.257867	0.0910753	-0.00403409	-0.00994389	3.24251	4.0998	0.0451544	-0.139222	0.763124	0.350658	0.00157334	-0.00631005	2.22377
4833445I07Rik	272.177	408.12	0.0484869	0.0532902	0.735453	0.710341	0.00602666	0.00677218	111.955	-240.5	0.0110236	-0.0207511	0.944067	0.894922	0.00133688	-0.00238696	14.3602	39.9622	-0.23262	-0.262144	0.0905105	0.0555033	-0.0128601	-0.0163959	153.035	-231.759	-0.00504616	-0.0819707	0.971965	0.567431	-0.000666521	-0.0106364									110.142	732.181	0.159973	0.0988547	0.282766	0.508557	0.0191498	0.0112664	65.2496
4921504A21Rik									102.049	948.339	-0.0482992	-0.0749846	0.758413	0.632727	-0.00599432	-0.00971815	12.0966	22.1039	0.0940249	0.0153925	0.498868	0.912036	0.00417395	0.000638119	346.047	-218.169	0.146501	0.0733321	0.304968	0.609069	0.0192041	0.00923429	17.2066	19.1136	0.184285	0.0650627	0.190932	0.64677	0.00890838	0.00299858									31.863
4921504E06Rik									35.6673	50.5975	0.101052	0.0689264	0.519077	0.660527	0.0104776	0.00675379									1153.54	-233.871	0.33763	0.314007	0.0153928	0.0248355	0.0609289	0.050959	177.606	229.575	0.210351	0.201692	0.134447	0.151615	0.0311637	0.0252539
4921507G05Rik									272.631	-132.738	0.158764	0.149478	0.309213	0.33872	0.023637	0.0199131									-465.253	-69.149	0.204271	0.133803	0.150481	0.349234	0.0255138	0.015544
4921507P07Rik	59.5523	36.8392	-0.340866	-0.372867	0.0143764	0.00704467	-0.0242994	-0.0235539	36.1721	54.7221	0.0589818	0.0192381	0.70714	0.902545	0.00546826	0.00174442	25.2406	44.6965	0.146337	0.126014	0.291019	0.363893	0.0106236	0.00708772	49.534	80.6223	-0.232257	-0.36715	0.100997	0.00804361	-0.0211665	-0.0311363	100.697	112.514	0.00700589	-0.0618207	0.960686	0.66329	0.000687749	-0.00522205									45.2392
4921508D12Rik
4921509A06Rik
4921509C19Rik
4921509O07Rik									218.329	-4876.23	0.0455247	0.0222279	0.771909	0.88749	0.0073294	0.00360557
4921511C10Rik	27.9859	28.6522	-0.304653	-0.32285	0.0297291	0.0208488	-0.0295414	-0.0287959	18.915	21.2463	-0.0501923	-0.154549	0.749244	0.322397	-0.00387289	-0.00759672									14.0862	20.2646	0.0215241	-0.164136	0.880828	0.249761	0.00128327	-0.00868657	10.0982	14.22	0.0479288	-0.0843744	0.735806	0.552041	0.00207352	-0.00383628	18.0088	22.6046	0.18703	0.096865	0.208093	0.517168	0.0153515	0.00746806	17.899
4921511E07Rik
4921511I17Rik									146.481	-125.183	0.16584	0.152576	0.287862	0.328688	0.0226141	0.0188902
4921513H07Rik
4921513I03Rik									90.1895	1653.65	-0.0122971	-0.0433357	0.937618	0.782604	-0.00169858	-0.00542241									198.106	-216.716	0.232883	0.177685	0.100055	0.212243	0.0331527	0.0231829
4921513I08Rik																	43.2144	-106.902	0.169701	0.148783	0.219904	0.282942	0.0183658	0.0148299
4921515E04Rik									63.7805	87.1449	-0.0687662	-0.0952954	0.661269	0.543276	-0.00941011	-0.0131339
4921516A02Rik
4921517D22Rik
4921518K17Rik									238.501	470.697	-0.0392035	-0.0728044	0.802901	0.642677	-0.00497798	-0.00870181
4921520N01Rik
4921521D15Rik
4921522A10Rik
4921522P10Rik																	101.756	-174.432	-0.0451407	-0.0755701	0.745848	0.587055	-0.00535673	-0.00889257
4921524J17Rik	11.7513	11.2702	-0.226961	-0.226026	0.109239	0.110747	-0.0106255	-0.00987996	18.7686	20.6695	-0.131995	-0.239764	0.398812	0.121479	-0.011262	-0.0149859	5.68232	10.8827	-0.199133	-0.254562	0.148855	0.0632255	-0.00673488	-0.0102707	7.4768	10.0876	-0.181505	-0.457036	0.20242	0.000747668	-0.00682189	-0.0167917	5.68725	8.65071	-0.226837	-0.311951	0.105849	0.0243643	-0.00749451	-0.0134043	11.0386	11.2129	0.20214	0.0681774	0.173008	0.648861	0.0109575	0.00307409	6.53982
4921524L21Rik									134.724	-280.722	0.0932039	0.0693543	0.552201	0.658548	0.0147106	0.0109867
4921525O09Rik									444.22	614.628	-0.0501533	-0.073082	0.749433	0.641407	-0.00814049	-0.0118643
4921527H02Rik									116.88	-439	0.0385775	0.0127628	0.805987	0.935261	0.00547903	0.00175519
4921528I07Rik									65.3991	62.2194	0.050675	0.0187868	0.746912	0.904821	0.00574195	0.00201812																	-521.935	350.895	0.0541428	0.019351	0.703041	0.891692	0.00848127	0.00257147
4921529L05Rik
4921531C22Rik	8.7311	8.54902	0.118316	0.133625	0.408289	0.349882	0.00512261	0.00586812	26.5811	43.6742	-0.0422727	-0.101273	0.787812	0.51816	-0.00313893	-0.00686276	12.0497	24.1231	-0.165986	-0.236969	0.230317	0.0844764	-0.00793127	-0.0114671	9.35864	13.676	-0.146742	-0.375312	0.304165	0.00665158	-0.00572933	-0.0156992	10.9364	16.5422	-0.155338	-0.23663	0.271497	0.091226	-0.0062156	-0.0121254	33.5451	44.4262	0.39944	0.302504	0.00541072	0.0387611	0.0306682	0.0227848	18.6252
4921534A09Rik
4921534H16Rik									246.571	250.788	-0.123053	-0.147103	0.431791	0.346538	-0.0184415	-0.0221653	31.6529	34.7638	-0.0326284	-0.0756268	0.814813	0.586774	-0.00348362	-0.00701945
4921536K21Rik									-1284.21	-141.187	-0.00711575	-0.0382456	0.963879	0.807624	-0.000861406	-0.00458524	-589.532	-77.4692	0.272158	0.256738	0.0464915	0.0609255	0.0372748	0.033739									-211.041	-184.695	0.0830563	0.0354942	0.558292	0.802735	0.0101995	0.00428965									-629.439
4921539E11Rik									92.7695	166.133	-0.028157	-0.0598491	0.857755	0.703029	-0.00361635	-0.00734019
4921539H07Rik									-556.222	-1551.27	0.121189	0.0969507	0.438854	0.536263	0.0156234	0.0118995	37.4608	47.9928	-0.161331	-0.261332	0.243836	0.0562914	-0.00959505	-0.0131309																									59.1267
4922502N22Rik									81.6348	-526.819	-0.027964	-0.0556547	0.85872	0.722984	-0.00437656	-0.00810039																	283.934	-105.935	0.130524	0.0958278	0.356376	0.499178	0.0167179	0.0108081
4930401A07Rik
4930401C15Rik
4930401O12Rik
4930402D18Rik	-1343.13	-344.118	0.153611	0.173675	0.281833	0.22291	0.0199563	0.0207018	95.7388	1915.25	-0.0212614	-0.0452816	0.892353	0.773094	-0.00355955	-0.00728338
4930402F06Rik
4930402F11Rik									48.9164	69.3777	0.131965	0.100842	0.398922	0.519951	0.0159851	0.0122612																	188.527	166.423	0.232364	0.229007	0.0973889	0.102462	0.0333814	0.0274716
4930402K13Rik
4930403P22Rik	135.852	-274.87	-0.0358907	-0.0304523	0.802559	0.832005	-0.00532312	-0.00457761	62.6953	-110.78	0.0584924	0.0326242	0.709463	0.835477	0.00740532	0.00368148	58.395	-75.7213	0.170669	0.151438	0.217245	0.274341	0.0218356	0.0182998									139.877	-90.3232	-0.129462	-0.181183	0.360336	0.19864	-0.0172101	-0.0231199
4930404H11Rik
4930404H24Rik
4930404I05Rik									716.749	-173.45	-0.0329939	-0.0767786	0.833639	0.624588	-0.0031671	-0.00689093	85.1686	-220.555	-0.0876747	-0.134524	0.528423	0.332131	-0.00739465	-0.0109305																	-9803.4	7840.49	0.0117761	-0.0478499	0.937381	0.749429	0.001609	-0.00627439	-327.505
4930404N11Rik
4930404O17Rik
4930405A10Rik
4930405A21Rik																	27.387	-267.282	-0.0989235	-0.135039	0.476666	0.330266	-0.00717843	-0.0107143
4930405D11Rik																																	143.191	-166.882	0.100656	0.0712659	0.477702	0.615631	0.0155123	0.00960253
4930405G09Rik
4930405H06Rik
4930405O22Rik									23.4227	44.0391	0.0945327	0.0756142	0.546523	0.629866	0.00858989	0.00486606	16.7121	43.3207	-0.0827595	-0.152473	0.551879	0.271039	-0.00645793	-0.00999376	16.6476	34.6442	-0.124972	-0.321156	0.382234	0.0215675	-0.00805819	-0.018028	25.6404	56.5877	-0.00351426	-0.0948382	0.980274	0.50364	-0.000260499	-0.0061703	26.2183	54.7188	0.146893	0.0598811	0.324481	0.689282	0.0125057	0.00462228	15.6116
4930407G08Rik
4930407I10Rik
4930407I19Rik
4930412B13Rik
4930412C18Rik	36.2312	15.2478	-0.189444	-0.198677	0.183041	0.16222	-0.0133628	-0.0126173	60.0076	39.7543	0.108763	0.0796415	0.487525	0.61169	0.0119988	0.00827493	17.6928	11.6571	0.289413	0.317424	0.0337845	0.0193437	0.0139837	0.0104479	15.1856	11.1455	-0.209719	-0.46803	0.139663	0.000533531	-0.00875221	-0.0187221	91.5597	26.8375	0.183612	0.143424	0.192585	0.310412	0.0149665	0.00905672	-66.4977	-219.897	0.0355612	-0.0195332	0.81242	0.896314	0.00514503	-0.00273836	20.2371
4930412E21Rik
4930412F09Rik
4930412F12Rik
4930412M03Rik									58.2052	-1725.72	0.159128	0.152775	0.308092	0.328051	0.0202852	0.0165614									72.1716	-213.471	0.00611382	-0.0825766	0.966037	0.564561	0.000691207	-0.00927864									104.633	-260.349	0.473024	0.425238	0.000785812	0.00288594	0.0592767	0.0513933	22.7189
4930413E15Rik
4930413G21Rik	38.0729	64.9814	-0.084244	-0.0800573	0.556698	0.576539	-0.00754749	-0.00680197	31.8574	189.48	-0.146531	-0.205687	0.348436	0.185758	-0.0135088	-0.0172326	20.0642	118.978	0.262175	0.2015	0.0554734	0.143987	0.0205057	0.0169699	23.9403	96.6432	-0.012516	-0.154722	0.930537	0.278327	-0.000902665	-0.0108725	63.1092	775.263	0.100644	0.0539194	0.477755	0.704211	0.0122345	0.00632466	59.8923	2724.38	0.15971	0.0938474	0.283569	0.530366	0.018295	0.0104116	42.9189
4930414F18Rik									67.274	125.497	-0.0552766	-0.0805983	0.724792	0.607405	-0.00835985	-0.0120837																	303.192	1027.34	0.226983	0.214848	0.105618	0.126127	0.034521	0.0286112									-4239.83
4930415L06Rik
4930417O13Rik									3006.48	530.726	0.00501852	-0.023413	0.974521	0.881534	0.000671813	-0.00305202
4930417O22Rik
4930419G24Rik																	10.8805	22.8904	-0.100968	-0.188326	0.467557	0.172641	-0.0057444	-0.00928023
4930421C12Rik									68.526	306.627	0.155479	0.134469	0.319459	0.389954	0.0222119	0.0184881
4930422C21Rik
4930422I22Rik																																									75.7499	-3778.02	0.179545	0.0882207	0.227202	0.555408	0.0145254	0.00664202
4930422M22Rik									49.418	-267.553	0.170892	0.146211	0.273219	0.3495	0.0182601	0.0145362	24.5033	-16020.5	0.0568878	0.0134637	0.682842	0.923023	0.00455693	0.0010211
4930423C22Rik
4930423D22Rik
4930423D24Rik
4930423M02Rik
4930425K10Rik
4930425L21Rik									1305.19	-105.105	0.00383933	-0.0170703	0.980506	0.913483	0.000731906	-0.00299193
4930425O10Rik
4930426D05Rik									323.66	-1015.71	0.0250046	-0.00554426	0.873543	0.971852	0.0030931	-0.00063073	1294.55	-100.294	0.00857383	-0.0231634	0.950936	0.867956	0.000949607	-0.00258623																									69.6823
4930426L09Rik
4930428D20Rik									26.8286	390.636	0.108877	0.0806902	0.487062	0.606994	0.0109206	0.00719681
4930428E07Rik									-1062.86	-1576.24	0.187749	0.155678	0.227961	0.318832	0.0249831	0.0212592	254.961	-806.739	0.0438269	0.0187996	0.753007	0.892669	0.00572553	0.00218969
4930428N03Rik									453.359	205.697	-0.0242567	-0.051318	0.877297	0.743809	-0.00376364	-0.00748747
4930428O21Rik
4930429D17Rik
4930429F24Rik									159.164	-131.024	0.25658	0.252083	0.0967407	0.102939	0.0330681	0.0293442	198.334	-73.2502	0.105605	0.07976	0.447253	0.566432	0.0138366	0.0103007									11.0553	19.3172	0.0348328	-0.0817636	0.80634	0.564453	0.00147389	-0.00443592
4930429H19Rik
4930430E12Rik									28.4436	98.0206	0.035009	-0.00994154	0.823634	0.94955	0.00297302	-0.000750813
4930430F08Rik	26.7364	11.6309	-0.00897146	0.00497089	0.950179	0.972383	-0.000495679	0.000249834	31.3693	17.6062	-0.0261764	-0.103503	0.867669	0.508939	-0.00184158	-0.00556541	7.25867	7.71555	-0.0712189	-0.173544	0.608823	0.209481	-0.00211456	-0.0056504	25.1065	15.9065	0.244795	0.0604684	0.0833996	0.673382	0.0128184	0.00284856	29.3743	11.1302	0.255654	0.142204	0.0673607	0.314586	0.0104941	0.0045843	90.1822	23.9997	0.338469	0.24614	0.0199603	0.0953599	0.0213225	0.0134391	14.6726
4930430F21Rik
4930431F12Rik									77.2222	166.58	0.0352873	0.00885985	0.822255	0.955033	0.00492413	0.00120029
4930431L21Rik
4930431P03Rik
4930431P19Rik	27.9625	20.2872	-0.1473	-0.117107	0.302308	0.413128	-0.00686461	-0.0061191	46.7349	56.2529	0.0823276	0.0451717	0.599693	0.773631	0.00708142	0.00335759	10.3216	15.2539	-0.0592366	-0.136708	0.670482	0.324268	-0.00252571	-0.00606154	19.1151	22.1864	-0.090287	-0.294616	0.528641	0.0358479	-0.00454549	-0.0145153	28.0145	26.6582	-0.137405	-0.245513	0.331363	0.0793717	-0.00690586	-0.0128157	23.0089	22.1169	0.199266	0.0493713	0.179328	0.741733	0.0105921	0.00270867	13.4154
4930432B10Rik	-90.3298	-4111.92	-0.0868249	-0.0845292	0.544629	0.555358	-0.0102281	-0.0094826									153.611	-688.056	0.0344725	0.0024205	0.804547	0.986141	0.00377204	0.000236202									-134.132	-293.072	0.0257113	-0.0268764	0.856423	0.84999	0.00306834	-0.00284146									-93.7412
4930432E11Rik									-214.185	79.184	-0.0239917	-0.0625652	0.878627	0.690211	-0.00266871	-0.00639255																	-63.8336	-1269.69	0.268164	0.268789	0.0545913	0.0540085	0.0447535	0.0388437
4930432J09Rik									141.114	202.238	0.0285098	0.00246828	0.855992	0.987467	0.00406579	0.000341962
4930432L08Rik									62.7162	423.687	-0.113804	-0.151208	0.467449	0.333093	-0.0133068	-0.0170306
4930432O09Rik
4930433B08Rik
4930433I11Rik
4930433J02Rik
4930433N12Rik
4930434F21Rik
4930434J06Rik									114.027	-345.331	-0.0450239	-0.0713281	0.774352	0.64945	-0.00639627	-0.0101201
4930435F18Rik
4930435M08Rik
4930435N07Rik
4930437M23Rik
4930438A08Rik									21.5112	23.8923	0.0739329	0.0486008	0.637519	0.75695	0.00892792	0.00520409
4930438E09Rik																									47.1262	-139.503	0.178941	0.0802769	0.208976	0.57549	0.0173105	0.00734061
4930439A04Rik									43.3276	-569.824	0.124666	0.102603	0.425733	0.512647	0.013686	0.00996218	39.5115	-202.164	0.0246813	-0.00644328	0.859388	0.963118	0.00284291	-0.00069292	110.929	-113.236	0.300341	0.253523	0.0322415	0.0726404	0.0443692	0.0343993									71.3833	-258.944	0.250419	0.194933	0.0895596	0.189167	0.0302942	0.0224108
4930439D14Rik
4930440C22Rik
4930440I19Rik									100.938	-994.516	-0.0379535	-0.0574637	0.809066	0.714355	-0.00637646	-0.0101003
4930441J16Rik
4930442G10Rik
4930442J19Rik
4930442L01Rik																																									39.672	59.2629	-0.354086	-0.380421	0.0146139	0.00834454	-0.0313534	-0.0392368	19.8984
4930443G03Rik
4930443O20Rik
4930444A19Rik									39.5844	54.0487	-0.0430398	-0.104273	0.784053	0.505776	-0.00333183	-0.00705566									97.3246	283.465	0.228461	0.121956	0.106853	0.393914	0.0189133	0.00894348	-535.346	-442.974	0.0222038	-0.0244863	0.875843	0.863196	0.00297037	-0.00293944	-104.196	-105.45	0.0337243	-0.0187399	0.821948	0.900503	0.00501463	-0.00286876
4930444F02Rik
4930444G20Rik
4930444P10Rik																	112.406	-197.984	0.0579605	0.0366119	0.677187	0.792678	0.00810256	0.00456672
4930445B16Rik									76.6871	-329.061	0.0921407	0.0702783	0.556764	0.654283	0.0129623	0.00923845
4930445E18Rik
4930445N06Rik
4930445N18Rik
4930447C04Rik									44.8714	32.29	0.126904	0.0911643	0.417404	0.56097	0.0121358	0.00841193	17.0249	13.3348	0.0732924	0.0174443	0.598406	0.900366	0.00435833	0.000822501									602.493	69.9415	0.175261	0.15804	0.21396	0.263145	0.024055	0.0181452	-141.709	433.679	0.0637053	0.0151264	0.670535	0.919618	0.010214	0.00233063	-424.376
4930447F24Rik																	9.25535	15.8608	-0.0596571	-0.129165	0.668278	0.351925	-0.00315187	-0.0066877
4930447J18Rik
4930447K03Rik
4930447M23Rik																	13.5951	28.2742	0.0252843	-0.0431089	0.855989	0.756929	0.00135251	-0.00218332
4930447N08Rik									68.2523	1420.15	0.0347256	0.00127118	0.82504	0.993545	0.00386206	0.000138223	71.5359	-187.687	0.0599559	0.0358061	0.666714	0.797143	0.00733609	0.00380025																	87.1621	553.594	0.0331476	-0.0539743	0.824944	0.718602	0.00312429	-0.0047591
4930448C13Rik									79.5767	2394.35	0.143312	0.113687	0.359241	0.467906	0.0174095	0.0136857
4930448D08Rik
4930448F12Rik
4930448I06Rik
4930448I18Rik
4930448K20Rik
4930449A18Rik									51.5093	67.0527	0.17711	0.144173	0.255883	0.356333	0.0198642	0.0161404									-3699.85	-262.974	-0.00875384	-0.0964851	0.951386	0.500608	-0.00107811	-0.011048	1039.3	432.55	0.174449	0.153321	0.216124	0.277848	0.0276626	0.0217528
4930449C09Rik
4930449E01Rik
4930452G13Rik									335.401	8372.54	-0.0771629	-0.101437	0.62285	0.517476	-0.0136251	-0.0173489	130.301	-834.101	0.0418037	0.0184528	0.764073	0.894637	0.00579572	0.00225988
4930452L12Rik
4930452N14Rik
4930453C13Rik									53.472	-294.171	-0.112467	-0.149786	0.472729	0.337714	-0.0149693	-0.0186932	35.9486	-277.826	-0.129005	-0.175014	0.352526	0.205588	-0.0151879	-0.0187237																	26.9473	117.137	-0.143568	-0.236678	0.335674	0.109213	-0.0118887	-0.0197721
4930453H23Rik
4930453L07Rik																	155.734	-98.0706	0.147802	0.136659	0.286162	0.324441	0.0235996	0.0200637
4930453N24Rik	5.94834	4.27858	-0.298928	-0.25541	0.0331023	0.0704654	-0.00805537	-0.00730986	21.15	14.283	0.0417352	-0.00558694	0.790449	0.971636	0.00336265	-0.000361178	6.77602	9.29583	-0.250965	-0.263455	0.0671798	0.0542481	-0.0078491	-0.0113849	5.46319	5.315	-0.00556609	-0.357794	0.969078	0.00994411	-0.000137781	-0.0101076	7.56085	8.40435	-0.220529	-0.276885	0.11618	0.0469056	-0.00668006	-0.0125899	10.8731	6.53107	0.531485	0.396356	0.000120986	0.00581431	0.0212028	0.0133194	6.29751
4930453O03Rik
4930455B14Rik
4930455C13Rik									75.4529	-170.422	0.0521456	0.0241454	0.73982	0.877855	0.0066629	0.00293906	57.2587	-90.8806	0.142262	0.121717	0.304808	0.380611	0.0162559	0.0127201																	130.202	-114.477	0.0125187	-0.0586726	0.933441	0.695246	0.00140258	-0.0064808
4930455H04Rik
4930455J16Rik									-159.463	562.293	0.130713	0.110046	0.403447	0.482373	0.0208139	0.0170901
4930455M05Rik
4930456G14Rik
4930456L15Rik
4930458A03Rik
4930458D05Rik	-270.652	231.538	0.279321	0.28269	0.0471446	0.0444352	0.0334937	0.0342392									36.6104	136.069	0.434539	0.370245	0.00102616	0.00585571	0.0254943	0.0219585	19.3644	22.8483	-0.329313	-0.461685	0.0182896	0.000649131	-0.0210183	-0.0309881	30.4042	29.1011	-0.102458	-0.194355	0.469816	0.167388	-0.00571491	-0.0116247	14.1877	13.6623	0.231453	0.0690928	0.117495	0.644459	0.0113687	0.00348528	74.9832
4930458K08Rik
4930459C07Rik									123.77	-579.748	-0.032422	-0.0614162	0.836483	0.695623	-0.00465018	-0.00837402
4930459L07Rik
4930461G14Rik																																																	18.2983
4930463O16Rik									106.467	-1086.6	0.122941	0.0880072	0.432214	0.57467	0.0135299	0.00980609
4930465K09Rik
4930466I24Rik																																									344.629	8086.17	-0.24535	-0.292897	0.0964616	0.0457178	-0.0292592	-0.0371426
4930466K18Rik									42.9651	-495.42	-0.0143102	-0.0553636	0.927431	0.724376	-0.00149029	-0.00521413	21.5644	410.668	0.054986	0.00900205	0.692912	0.948489	0.00418779	0.000651954																									76.4403
4930467D21Rik									121.322	263.446	0.0887196	0.0571218	0.571565	0.715983	0.0113186	0.0075948
4930467E23Rik									89.0442	243.361	-0.0569909	-0.0893011	0.716607	0.569037	-0.00648134	-0.0102052
4930467J12Rik
4930467K11Rik
4930469K13Rik									67.8546	-295.261	0.207179	0.189064	0.182516	0.224659	0.0273434	0.0236196
4930470B04Rik																	25.4165	64.0757	0.142647	0.110296	0.303486	0.427215	0.0111458	0.00760996																	140.37	600.002	-0.0775523	-0.15022	0.604363	0.313523	-0.00891773	-0.0168011
4930470G03Rik
4930470O06Rik
4930470P17Rik
4930471C04Rik
4930471D02Rik
4930471E19Rik
4930471G24Rik
4930473A02Rik									114.013	-174.991	0.00710462	-0.0231907	0.963935	0.88265	0.000925767	-0.00279807	36.3462	-233.922	-0.0286747	-0.0717044	0.836926	0.606377	-0.00230538	-0.00584122
4930473D10Rik
4930473H19Rik
4930473O22Rik
4930474H20Rik
4930474N05Rik
4930477N07Rik									39.7057	608.124	-0.0126873	-0.0408601	0.935642	0.794747	-0.00177518	-0.00549901
4930477O15Rik
4930478E11Rik									257.484	-147.748	0.0170211	-0.0075859	0.913731	0.961494	0.00264046	-0.00108337
4930478M13Rik
4930478P22Rik
4930480E11Rik
4930480G23Rik
4930480K02Rik
4930480K15Rik									185.545	-552.75	0.100424	0.0791643	0.521688	0.613832	0.0147627	0.0110389	16.1193	23.1878	-0.0532092	-0.104023	0.702367	0.454125	-0.00429187	-0.0078277
4930481A15Rik	9.98621	9.01829	-0.142724	-0.131618	0.317741	0.357233	-0.0073742	-0.00662869	34.1382	42.9497	0.0897256	0.0627464	0.567194	0.689359	0.0082953	0.00457147	21.173	52.5125	-0.0403856	-0.0958982	0.771857	0.490315	-0.00250034	-0.00603617	14.5386	19.4421	-0.233211	-0.419119	0.099565	0.00220454	-0.012275	-0.0222449	7.44974	11.227	-0.17603	-0.229945	0.211925	0.101024	-0.00698157	-0.0128914	17.4045	19.1719	0.182195	0.0589882	0.220304	0.693687	0.0116378	0.00375439	10.2339
4930481B07Rik									66.7289	-1585.07	-0.0384217	-0.0795179	0.806755	0.612244	-0.00428145	-0.00800528	51.1701	-232.081	0.136592	0.107983	0.324681	0.43703	0.0142133	0.0106775	52.9125	-834.922	0.000942027	-0.127535	0.994765	0.372473	7.45995e-05	-0.00989524									82.1825	652.597	-0.0996409	-0.186727	0.505174	0.208842	-0.0103374	-0.0182208	161.672
4930483O08Rik
4930484H19Rik
4930486F22Rik
4930486I03Rik																																																	55.4033
4930488L21Rik									474.272	115.05	0.147287	0.114212	0.345925	0.465844	0.0176448	0.013921	29.7978	23.7116	-0.0353601	-0.117962	0.799618	0.395587	-0.00192583	-0.00546166
4930488N15Rik									139.425	-282.461	0.0465043	0.0228741	0.767136	0.884242	0.00720839	0.00348456
4930488N24Rik
4930500F04Rik									767.008	-187.884	-0.0402246	-0.0657866	0.797872	0.675118	-0.00618727	-0.0099111
4930500M09Rik									118.127	-150.079	-0.00345265	-0.0371414	0.982469	0.813078	-0.000372725	-0.00409656
4930502A04Rik
4930502C17Rik
4930502E09Rik
4930503E14Rik									97.8515	454.662	-0.0589513	-0.0824266	0.707285	0.599253	-0.00932375	-0.0130476
4930503E24Rik									53.3791	524.17	0.17989	0.150142	0.248375	0.336553	0.0205962	0.0168724
4930503F20Rik
4930503L19Rik	99.0605	25.5155	-0.379992	-0.406813	0.00595213	0.00305157	-0.032053	-0.0313075	21.2042	14.4631	-0.162056	-0.25663	0.299158	0.096674	-0.0130136	-0.0167375	8.57386	9.32189	-0.131368	-0.218068	0.3437	0.113171	-0.00429533	-0.00783116	12.4032	7.81416	0.181684	-0.0972569	0.201968	0.497171	0.00700673	-0.00296312	23.3623	12.2622	-0.221878	-0.389729	0.113909	0.00429108	-0.010589	-0.0164988	55.4347	24.1332	0.307471	0.233607	0.0355198	0.114025	0.0242666	0.0163832	32.9866
4930503O07Rik
4930504C09Rik
4930505A04Rik																									87.8076	-164.023	0.0524661	-0.0234996	0.714629	0.869981	0.00698463	-0.00298522
4930505G20Rik
4930505M18Rik																	44.6633	-268.678	0.179004	0.162923	0.195281	0.239152	0.0189469	0.0154111
4930505N22Rik																	73.6967	-96.8897	0.319838	0.293286	0.0183925	0.0313696	0.0385084	0.0349726	131.798	-82.0641	0.307495	0.218989	0.0281639	0.122604	0.0314972	0.0215274																	98.0225
4930506C21Rik	24.5556	21.4421	-0.172976	-0.173077	0.224807	0.224532	-0.0115875	-0.010842	142.522	-237.962	0.0486196	0.0192764	0.756859	0.902352	0.00562617	0.00190234	12.0387	26.4479	-0.0229483	-0.0854358	0.869172	0.539045	-0.0011044	-0.00464023	41.8162	136.481	-0.164201	-0.313448	0.24957	0.0251073	-0.0108912	-0.0208611	43.1703	63.2641	-0.153823	-0.2273	0.276256	0.105118	-0.0118051	-0.0177149	90.2098	217.364	0.15356	0.0649494	0.302759	0.664478	0.013934	0.00605066	26.2298
4930507D05Rik
4930507D10Rik
4930509E16Rik									59.2691	-278.849	-0.0976006	-0.145314	0.533521	0.352497	-0.0103164	-0.0140402
4930509G22Rik									237.65	-647.478	-0.0829678	-0.10374	0.596849	0.507964	-0.0118216	-0.0155454
4930509H03Rik	22.2203	26.2766	-0.343266	-0.351136	0.0136603	0.0115217	-0.0265644	-0.0258189	22.8743	54.2414	0.0709654	0.0254343	0.651118	0.871388	0.0055566	0.00183277	8.92806	21.582	0.0512511	-0.0306354	0.712838	0.825943	0.00221066	-0.00132517	17.0028	40.0737	-0.172682	-0.316038	0.225606	0.0238671	-0.0104217	-0.0203915	27.5979	59.6608	0.0141833	-0.0773706	0.920506	0.585628	0.000973122	-0.00493668	19.4689	33.0142	-0.170864	-0.290871	0.250841	0.047308	-0.0117848	-0.0196681	16.9646
4930509J09Rik									58.0189	209.568	0.172361	0.146065	0.269056	0.349988	0.0233114	0.0195875																	394.369	-262.971	0.209104	0.197588	0.136826	0.160297	0.0358797	0.0299699
4930509K18Rik
4930510E17Rik									48.6811	149.628	0.0258416	-0.00738215	0.869346	0.962527	0.00290314	-0.00082069
4930511A02Rik
4930511E03Rik																									69.7991	202.242	-0.169102	-0.290016	0.235521	0.0389812	-0.0157604	-0.0257303
4930511J24Rik
4930511M06Rik									566.733	398.156	-0.00792643	-0.0360865	0.959767	0.818296	-0.00114332	-0.00486716									-156.227	-181.866	-0.0788538	-0.164724	0.582301	0.248045	-0.0105505	-0.0205204	-140.661	-411.157	0.122468	0.0954771	0.387081	0.500757	0.0189984	0.0130886	258.561	74.9685	0.349572	0.294069	0.0160164	0.0448184	0.0339871	0.0261037	426.497
4930511M18Rik									42.474	-460.086	-0.0996443	-0.136345	0.524944	0.383311	-0.0121525	-0.0158763
4930511O05Rik
4930512B01Rik									44.2135	33.1584	-0.0373575	-0.0954264	0.81201	0.54272	-0.00315815	-0.00688198	45.0279	46.8803	0.130577	0.11031	0.346638	0.427154	0.0109567	0.00742083	836.952	206.247	0.0514721	-0.0433011	0.719813	0.762875	0.0057091	-0.00426075	-464.012	158.797	-0.061126	-0.125774	0.666851	0.374293	-0.00765097	-0.0135608									41.0127
4930512H18Rik									81.1512	-629.961	0.0880014	0.0582338	0.574695	0.710692	0.0101428	0.006419																	67.0976	166.581	0.21994	0.182827	0.117183	0.194527	0.0206593	0.0147495
4930512J16Rik									186.357	-399.187	0.307263	0.294973	0.0450422	0.0548281	0.0488207	0.0450969
4930512M02Rik									34.1375	255.526	0.053897	0.0178667	0.731402	0.909463	0.00534142	0.00161759
4930513D17Rik									76.1389	1226.75	-0.0239696	-0.050935	0.878738	0.745657	-0.0034476	-0.00717144
4930513N10Rik									108.404	71.3864	-0.0412253	-0.107952	0.792953	0.490794	-0.00344274	-0.00716657									-109.638	-139.546	0.149802	0.0475683	0.294079	0.740288	0.014009	0.00403912																	-94.4356
4930513N20Rik																									111.827	-230.417	0.278204	0.224601	0.0480715	0.113074	0.040083	0.0301131	56.1364	182.449	-0.162663	-0.220942	0.249257	0.115482	-0.0176091	-0.0235189									52.8761
4930513O06Rik									117.12	-121.098	0.059888	0.0376997	0.702845	0.810319	0.010069	0.00634513
4930515G16Rik
4930515L19Rik
4930516B21Rik																	26.4032	603.685	-0.1892	-0.219541	0.170622	0.110697	-0.014969	-0.0185048																									123.342
4930516K23Rik									29.9643	84.893	0.047571	0.0124269	0.761948	0.936961	0.00496632	0.00124249
4930517E11Rik
4930517E14Rik									197.967	798.738	-0.157165	-0.199219	0.314174	0.20028	-0.0206832	-0.0244071	97.5203	-754.204	0.177148	0.14859	0.200029	0.283575	0.0186777	0.0151418	302.784	-835.325	-0.0206703	-0.135015	0.885523	0.344846	-0.00188082	-0.0118507	-173.797	-208.334	-0.0269734	-0.0737552	0.849455	0.603317	-0.00375387	-0.00966367									-198.368
4930517G19Rik									108.451	-647.091	0.313969	0.31409	0.0403318	0.0402509	0.045017	0.0412932																	258.528	-288.327	0.0891994	0.0411197	0.529451	0.77225	0.0105227	0.00461288	306.963	-248.594	-0.0835111	-0.146417	0.576788	0.32607	-0.0101718	-0.0180552	44.4711
4930517J16Rik
4930517O19Rik
4930518I15Rik	27.9979	30.7486	-0.172409	-0.16002	0.226353	0.261995	-0.0110787	-0.0103332	20.6477	27.2318	0.0777286	0.0383441	0.620295	0.807138	0.00584439	0.00212055	13.1641	25.3615	0.06236	-0.00132437	0.654179	0.992417	0.00347219	-6.36471e-05	23.3089	40.8593	-0.0603059	-0.210794	0.67421	0.1376	-0.00441489	-0.0143847	29.1571	48.6187	-0.0521356	-0.147968	0.71357	0.295168	-0.00337798	-0.00928778	20.6476	26.3002	0.12099	0.00713405	0.417874	0.962041	0.00832411	0.000440723	16.6011
4930518I17Rik
4930518J21Rik
4930518P08Rik
4930519A11Rik
4930519D14Rik									61.1383	-705.482	-0.0589694	-0.0909113	0.707199	0.562062	-0.00735233	-0.0110762
4930519E07Rik									243.764	-188.19	0.0321195	0.0099302	0.837988	0.949608	0.00532498	0.00160114
4930519F09Rik
4930519F16Rik									193.193	478.013	-0.136411	-0.171688	0.383081	0.270958	-0.019451	-0.0231748	222.487	-296.254	-0.0766215	-0.10917	0.581848	0.431978	-0.0117247	-0.0152605
4930519F24Rik
4930519G04Rik
4930519H02Rik									71.7155	-504.643	-0.0100354	-0.0370899	0.949075	0.813333	-0.00143796	-0.00516179
4930519K11Rik																	62.3396	-196.835	0.0272389	-0.0142503	0.844988	0.91854	0.00232896	-0.00120687
4930519L02Rik									23.0036	84.7575	0.142282	0.113596	0.362741	0.468268	0.0111905	0.00746666
4930520K02Rik
4930520O04Rik									73.1444	75.1187	0.232912	0.198975	0.132825	0.200843	0.0179073	0.0141835	150.43	-509.546	0.186366	0.165221	0.177235	0.232503	0.017708	0.0141722									-1622.87	134.427	0.246493	0.195777	0.0781417	0.164241	0.019926	0.0140162	-127.535	-255.492	0.281552	0.235537	0.0552085	0.110982	0.0427374	0.034854
4930521E06Rik
4930522H14Rik									66.603	-376.319	0.0468571	0.0220507	0.765419	0.888382	0.00670105	0.00297722
4930522L14Rik	479.402	153.354	-0.0972316	-0.0903288	0.497284	0.528449	-0.011721	-0.0109755	17.0246	17.3866	0.203906	0.184273	0.189679	0.236843	0.0116061	0.00788229	15.62	23.7312	0.496099	0.507782	0.000136237	8.87827e-05	0.0282454	0.0247096	14.2383	16.4211	0.342177	0.148244	0.0139813	0.299187	0.0162005	0.00623062	50.3831	46.394	0.192157	0.143561	0.172335	0.309946	0.014646	0.00873616	21.9417	19.1722	0.378183	0.314618	0.00876683	0.0312514	0.0241355	0.0162521	12.8105
4930523C07Rik	10.0045	5.74645	-0.605065	-0.584	2.562e-06	6.83646e-06	-0.0251964	-0.0244509	15.9311	9.45387	0.0358067	-0.0143657	0.819682	0.92715	0.00282452	-0.000899316	29.3287	15.1795	0.167666	0.137288	0.225566	0.322201	0.00976536	0.00622952	5.06597	4.61166	-0.308806	-0.554012	0.0274655	2.46965e-05	-0.00885357	-0.0188234	6.21785	5.26733	0.00928693	-0.162452	0.947901	0.24988	0.000245895	-0.00566391	22.6118	9.26605	0.438181	0.369328	0.00206624	0.0106236	0.0250303	0.0171469	8.50744
4930523O13Rik									82.8938	1617.67	0.173458	0.14063	0.265975	0.368395	0.0233708	0.019647
4930524B15Rik
4930524B17Rik									89.8897	629.323	0.0850028	0.0592477	0.587847	0.705879	0.0118352	0.0081114
4930524C18Rik									88.4831	617.864	0.0913112	0.0662914	0.560336	0.672764	0.0122486	0.0085248
4930524O08Rik
4930525G20Rik	-187.899	484.383	-0.0775093	-0.0705668	0.58877	0.622671	-0.00967817	-0.00893265	-920.663	-224.507	0.0997687	0.0768409	0.524424	0.624306	0.0152578	0.011534	46.0925	150.805	-0.0295166	-0.0778816	0.832206	0.575636	-0.00232083	-0.00585666	342.798	-4664.63	-0.159261	-0.233409	0.264296	0.0992689	-0.0201608	-0.0301307																	9656.63
4930526A20Rik
4930526F13Rik
4930526H09Rik
4930526L06Rik
4930528D03Rik
4930528G23Rik									65.6323	388.289	0.0840186	0.0542197	0.592193	0.729854	0.00970829	0.00598446
4930528H21Rik
4930528J11Rik																																									-94.7917	-167.849	-0.0187445	-0.0797708	0.900479	0.59403	-0.00231837	-0.0102018
4930528P14Rik
4930529C04Rik
4930529K09Rik									47.2002	235.501	0.0411924	0.0077467	0.793114	0.960678	0.004591	0.000867166
4930529N20Rik
4930532G15Rik																																									-1056.69	-169.221	-0.265476	-0.31026	0.0713064	0.0338001	-0.0349973	-0.0428807
4930532I03Rik									58.0238	286.976	0.17672	0.147927	0.25695	0.343811	0.0171229	0.0133991	21.2136	48.0761	0.000232128	-0.0592664	0.998671	0.670326	1.62946e-05	-0.00351954
4930532M18Rik
4930533B01Rik																	53.0206	-117.25	0.0177289	-0.0136498	0.898749	0.921962	0.00208863	-0.0014472																	46.8534	249.773	0.0718777	-0.00332389	0.631141	0.982309	0.00752667	-0.000356712	75.0905
4930533I22Rik																																																	16.9681
4930533L02Rik
4930533N22Rik
4930533P14Rik
4930534H03Rik									164.96	-225.731	-0.0517516	-0.0806255	0.741718	0.607283	-0.00771745	-0.0114413
4930538E20Rik
4930538L07Rik
4930539C22Rik
4930539J05Rik									592.801	-95.9117	-0.116	-0.157123	0.45884	0.314305	-0.0159038	-0.0196277	65.2474	-96.4607	0.0132256	-0.0272656	0.92438	0.844838	0.0011713	-0.00236453																									15460.1
4930539M17Rik
4930540E01Rik
4930540M03Rik
4930540M05Rik
4930542C16Rik
4930543E12Rik
4930543N07Rik
4930544F09Rik
4930544G11Rik
4930544I03Rik
4930544L04Rik
4930544M13Rik
4930545L23Rik									64.7451	125.264	0.163393	0.137152	0.295136	0.380476	0.0165003	0.0127765	55.2337	141.809	-0.0333257	-0.0689162	0.810928	0.620481	-0.00428182	-0.00781765
4930546C10Rik
4930546K05Rik									197.57	177.331	-0.0263003	-0.0613697	0.867048	0.695843	-0.00336109	-0.00708492
4930548G14Rik
4930548H24Rik
4930548K13Rik
4930549C15Rik	75.5817	129.045	-0.197202	-0.201242	0.165426	0.156758	-0.0206617	-0.0199162	19.6847	30.5017	0.0154453	-0.0487477	0.921692	0.756238	0.00114464	-0.00257919	26.4393	232.641	0.141905	0.112589	0.306036	0.417609	0.0115019	0.00796608	29.2635	86.2535	-0.0592299	-0.208845	0.679707	0.141359	-0.00466127	-0.0146311	74.4755	431.107	0.029206	-0.0227379	0.837157	0.872881	0.00347999	-0.00242981									58.5494
4930550C14Rik									50.326	47.6468	0.261792	0.262827	0.089921	0.0886114	0.0240433	0.0203195	86.0192	227.789	0.202343	0.201627	0.142281	0.143729	0.0231184	0.0195825	132.723	137.742	0.360683	0.281597	0.00931967	0.0452993	0.0308386	0.0208687																	42.4169
4930550C17Rik
4930551L18Rik
4930551O13Rik	280.291	-221.376	0.0850392	0.0966011	0.552965	0.500091	0.00998089	0.0107264																																	37.9342	168.889	-0.0493114	-0.128585	0.742036	0.389029	-0.00430664	-0.01219
4930553P18Rik																	29.9417	386.359	0.000673073	-0.0475693	0.996146	0.732671	4.94921e-05	-0.00348634
4930554C24Rik																																	-195.668	-293.69	0.226179	0.209192	0.106892	0.136657	0.028853	0.0229432
4930554G24Rik
4930554H23Rik
4930555A03Rik									55.4419	191.08	0.191887	0.16853	0.217685	0.280003	0.0183831	0.0146593									33.0558	73.6014	0.021604	-0.148854	0.880389	0.297181	0.00137655	-0.0085933	66.5679	123.077	-0.18993	-0.262503	0.177457	0.0601032	-0.0160976	-0.0220074
4930555B11Rik
4930555F03Rik									89.9624	65.7757	-0.0189669	-0.0494065	0.903913	0.753046	-0.00245327	-0.0061771																	-596.463	143.945	0.0989932	0.0686452	0.485043	0.628709	0.0147927	0.00888285
4930555G01Rik
4930555G07Rik									90.0091	-359.92	0.00367138	-0.0205876	0.981359	0.895746	0.000574807	-0.00314903
4930555M17Rik
4930555O08Rik
4930556G01Rik
4930556H04Rik
4930556J02Rik									251.953	599.308	0.152238	0.130585	0.329774	0.403912	0.022086	0.0183621
4930556M19Rik									48.1369	22.887	0.0180198	-0.04238	0.90869	0.787286	0.00129625	-0.00242758	222.131	113.165	0.0743206	0.0513095	0.59327	0.712525	0.00840938	0.00487354	110.979	38.38	0.0288815	-0.11681	0.840555	0.414323	0.00216248	-0.00780737	-533.919	45.5697	0.251659	0.243308	0.0719064	0.0821941	0.0228373	0.0169275	-92.5623	67.0161	0.309639	0.214361	0.034177	0.147927	0.0223295	0.0144461	12.4822
4930556N09Rik									52.9333	9468.35	0.0035469	-0.0259455	0.981991	0.868826	0.000455519	-0.00326831
4930556N13Rik	43.7435	66.8795	-0.0664995	-0.0645115	0.642905	0.65289	-0.00714691	-0.00640139
4930557F08Rik
4930557F10Rik
4930557J02Rik
4930557K07Rik
4930558C23Rik									72.5299	-113.972	0.0583213	0.0320884	0.710276	0.838143	0.00786931	0.00414548
4930558G05Rik
4930558J18Rik									34.5939	60.3606	0.136851	0.100617	0.381531	0.520887	0.0118924	0.00816854
4930558J22Rik
4930558K02Rik
4930558N11Rik									888.577	-133.097	0.121119	0.102908	0.43912	0.51139	0.0215174	0.0177935
4930559C10Rik
4930562A09Rik
4930562C15Rik									378.476	146.234	-0.132355	-0.165609	0.397514	0.288543	-0.0170053	-0.0207291	189.78	253.392	0.253829	0.250283	0.0640154	0.0679507	0.0229989	0.019463									-92.9642	-404.247	0.0499894	0.00884541	0.724886	0.950375	0.00697312	0.00106331	-69.639	-205.643	0.0898413	0.0306679	0.548138	0.837857	0.0116446	0.00376122	-95.9356
4930562D21Rik
4930562F07Rik									47.1661	-332.008	0.0534765	0.0220431	0.73342	0.88842	0.00589089	0.00216705									49.5444	-322.114	0.0267538	-0.0687975	0.852165	0.63144	0.00283356	-0.00713629
4930562F17Rik
4930563E22Rik	-151.573	591.432	0.108127	0.11822	0.450096	0.408672	0.0138105	0.014556	143.225	269.523	0.0510004	0.0163366	0.745341	0.917188	0.00517478	0.00145095	12.2462	21.3569	0.0857692	0.00471191	0.537457	0.973024	0.00379013	0.000254292									283.76	121.344	0.0262545	-0.0514387	0.853423	0.717238	0.00218055	-0.00372925									105.403
4930563M21Rik									32.9412	50.4736	0.0163072	-0.016234	0.917337	0.917707	0.00189022	-0.00183361																	106.632	162.546	0.22148	0.211468	0.114575	0.132344	0.032332	0.0264222									95.9253
4930565D16Rik
4930565N06Rik									53.6892	137.977	0.182422	0.13922	0.241669	0.373267	0.0136705	0.00994662									48.4328	91.6025	0.162132	0.0168556	0.255669	0.906545	0.0109479	0.000978043									254.581	534.826	-0.382441	-0.448337	0.00797862	0.00157512	-0.0396188	-0.0475021	2792.58
4930566N20Rik
4930567H12Rik
4930567K12Rik									63.7971	-16269.7	0.0324162	0.00347857	0.836512	0.982338	0.00412348	0.000399652	32.1722	223.735	0.078309	0.0493838	0.573536	0.722874	0.00787075	0.00433491
4930567K20Rik																																	48.4844	149.574	0.38374	0.360975	0.00498011	0.00856251	0.0356751	0.0297653
4930568A12Rik									80.3835	-240.723	0.286296	0.256311	0.0627129	0.0971037	0.0341596	0.0304358
4930568A13Rik
4930568D16Rik									69.7622	-470.281	0.121847	0.0916076	0.436353	0.559058	0.0153607	0.0116368
4930568E12Rik									71.0446	-285.125	-0.0873793	-0.114417	0.577413	0.465036	-0.0142441	-0.0179679
4930568G15Rik									120.796	138.714	-0.0279494	-0.0604046	0.858793	0.700401	-0.00345564	-0.00717948	135.363	-1879.41	-0.0778942	-0.13042	0.575574	0.347226	-0.00860453	-0.0121404
4930570B17Rik																	17.6142	43.8075	0.0177285	-0.0357309	0.898751	0.79756	0.00132174	-0.0022141
4930570G19Rik									96.4334	90.1454	0.0539813	0.0204945	0.730997	0.896214	0.006032	0.00230816	9.90873	11.5962	-0.0325499	-0.118284	0.815252	0.394291	-0.00134164	-0.00487747	791.708	336.082	0.0989971	0.013741	0.489469	0.923757	0.0114657	0.00149588
4930570N18Rik
4930571K23Rik
4930571N24Rik
4930572G02Rik									707.379	91.2825	0.0916333	0.0547077	0.558948	0.727516	0.00913057	0.00540673	-257.013	-451.94	0.0566511	0.0347113	0.684092	0.80322	0.00745638	0.00392055
4930572O03Rik
4930573H18Rik
4930577H14Rik									39.3482	-671.25	0.266673	0.241931	0.0838766	0.118048	0.0283801	0.0246563
4930577N17Rik	736.442	15758.8	-0.223834	-0.2202	0.114343	0.120498	-0.0283308	-0.0275853	62.4105	-1790.83	0.159238	0.136244	0.307751	0.383668	0.0152329	0.0115091									145.174	-197.433	-0.00144301	-0.0854506	0.991982	0.55104	-0.000175855	-0.0101457									142.174	-565.248	-0.145819	-0.220343	0.328073	0.136677	-0.015771	-0.0236544	91.917
4930578I06Rik
4930578I07Rik
4930578M01Rik									-1209.5	178.774	0.0780269	0.052566	0.61895	0.737797	0.0115095	0.00778563	41.0486	33.0764	0.0289728	-0.0373253	0.835254	0.788731	0.00157074	-0.00196509	81.0821	35.8216	0.160344	0.0207083	0.261018	0.885314	0.0113682	0.00139835	-76.9688	71653.2	-0.00896272	-0.0652967	0.949718	0.645583	-0.0011293	-0.00703911
4930579C12Rik									86.3608	96.5306	0.0360274	0.00307473	0.818589	0.984388	0.00407219	0.000348361
4930579F01Rik									98.4556	259.327	0.0892325	0.0645459	0.569335	0.680917	0.0126256	0.0089018
4930579G18Rik									50.898	-269.79	-0.116282	-0.162042	0.457744	0.299202	-0.0125714	-0.0162952	40.3339	-121.121	-0.114588	-0.162709	0.409336	0.239778	-0.0114441	-0.0149799																									101.3
4930579G24Rik	29.2735	27.4673	0.0391763	0.0496538	0.784897	0.729327	0.00263693	0.00338244	21.8869	26.2547	-0.0756353	-0.124897	0.62977	0.424869	-0.00793934	-0.0116632	14.7036	41.1274	-0.0382525	-0.101579	0.783608	0.464856	-0.00182189	-0.00535772	17.7121	25.8516	0.0627186	-0.105758	0.661946	0.460141	0.00375788	-0.00621196	21.0667	29.7461	-0.0214799	-0.134324	0.879861	0.342422	-0.00103972	-0.00694952	27.2619	31.1609	-0.0215048	-0.142214	0.885914	0.340298	-0.00160092	-0.0094843	29.0899
4930579H20Rik									84.4292	-34807	0.155829	0.135288	0.318358	0.387046	0.0223513	0.0186274
4930579J19Rik									313.672	-156.528	0.151207	0.129844	0.333098	0.406608	0.0237134	0.0199896									70.4542	3085.19	0.398144	0.305721	0.0038097	0.0291323	0.0386487	0.0286789																	78.6606
4930579K19Rik									85.3568	-200.123	0.0604217	0.0299383	0.70032	0.848858	0.0072992	0.00357536	41.7559	-175.919	0.187629	0.151828	0.174264	0.273094	0.0174185	0.0138826	90.7887	-122.229	0.141224	0.0462728	0.322907	0.747124	0.0142158	0.00424596																	57.8741
4930579M01Rik
4930579O11Rik
4930579P08Rik
4930581F22Rik	-94.1893	69.8168	0.0555441	0.0648555	0.69866	0.651157	0.00484489	0.0055904	31.1269	20.1357	0.0752333	0.0221357	0.631596	0.887954	0.0049947	0.00127087	45.3215	41.3282	0.308674	0.264298	0.0231485	0.0534536	0.0178697	0.0143339	65.8074	31.1101	0.285713	0.128797	0.0421135	0.367721	0.0166716	0.00670172	-202.293	59.7161	0.09278	0.0126788	0.512986	0.928916	0.0067037	0.000793893	36.611	16.1201	-0.0484196	-0.218894	0.746544	0.139342	-0.00269281	-0.0105762	-462.642
4930583I09Rik
4930584E12Rik
4930584F24Rik
4930586N03Rik									99.7384	-107.608	-0.130114	-0.155643	0.405627	0.31894	-0.0178495	-0.0215733
4930587A21Rik
4930587E11Rik									53.6448	2100.4	0.288272	0.267788	0.0608422	0.0825416	0.0392225	0.0354987	30.3913	478.365	0.0141987	-0.0228776	0.918834	0.869571	0.00146768	-0.00206816
4930588G17Rik									187.259	-101.017	0.191074	0.18136	0.21968	0.244468	0.0236977	0.0199738	89.9417	-82.0808	0.0974157	0.0708388	0.483443	0.610741	0.0107898	0.00725399
4930588J15Rik
4930589L23Rik
4930589O11Rik																									93.2624	-83.9482	0.0426656	-0.0506624	0.766257	0.724044	0.00445794	-0.0055119
4930590J08Rik									100.057	70.0584	0.0918004	0.0648566	0.558228	0.679463	0.0115974	0.0078736	47.6011	42.6103	0.282569	0.306028	0.0384276	0.0244164	0.0228747	0.0193389	-1531.81	231.185	0.24561	0.182231	0.0823439	0.200589	0.0296298	0.01966	-392.488	121.072	0.138376	0.104086	0.327924	0.462748	0.0166284	0.0107186
4930590L14Rik
4930590L20Rik									67.5822	-111.936	0.0587529	0.0378678	0.708226	0.809489	0.0089516	0.00522776
4930591A17Rik
4930591E09Rik
4930592A05Rik									58.3693	-3093.06	-0.00149777	-0.0285097	0.992395	0.855992	-0.000208426	-0.00393226	69.7907	-109.105	0.183549	0.179772	0.183991	0.193339	0.0259376	0.0224017
4930592C13Rik																																																	83.1838
4930593A02Rik
4930593C16Rik
4930594C11Rik									485.258	-237.937	0.0845516	0.0667937	0.589838	0.670425	0.0100795	0.00635568									1076.32	-239.744	0.26824	0.195947	0.057019	0.168188	0.0302145	0.0202447									21.5492	20.1601	0.174948	0.0378156	0.239522	0.800763	0.0099168	0.00203341
4930594M17Rik
4930594M22Rik									80.9197	69.5639	-0.00498327	-0.0412645	0.9747	0.79276	-0.000533739	-0.00425757	23.9616	22.9201	0.158182	0.138909	0.253284	0.316463	0.0114796	0.00794381	1172.88	290.832	0.195869	0.122911	0.16836	0.390197	0.0221563	0.0121865	-393.566	139.086	0.259589	0.250164	0.0631102	0.073669	0.0263418	0.020432	880.501	93.6367	0.0733723	-0.00739186	0.624041	0.960671	0.00719193	-0.000691458	40.4464
4930594O21Rik
4930595D18Rik									66.2442	-130.497	0.0344577	0.00521468	0.826369	0.973525	0.00433373	0.000609899
4930595L18Rik
4930595M18Rik
4930596D02Rik
4930596I21Rik									50.9641	-76.6613	0.168004	0.148696	0.281529	0.341282	0.0202256	0.0165017
4930597A21Rik
4930597L12Rik																	63.1409	-81.8259	-0.0326181	-0.0613669	0.814871	0.659346	-0.00385775	-0.00739358
4930597O21Rik
4930598F16Rik
4930598N05Rik																	150.052	-150.992	0.127928	0.110194	0.356595	0.427642	0.0164967	0.0129608
4930599A14Rik
4930599N23Rik									75.0111	-259.822	0.113317	0.0972425	0.469368	0.535031	0.0178908	0.014167									24.5792	131.618	-0.0102614	-0.153488	0.943027	0.282225	-0.000762662	-0.0107325	35.8674	439.329	-0.0849405	-0.158621	0.549367	0.261373	-0.00660829	-0.0125181	67.629	-164.524	-0.247235	-0.319547	0.0938477	0.0285626	-0.0247107	-0.0325941	44.1281
4930599N24Rik
4931406B18Rik
4931406C07Rik	5.15493	3.55391	0.0119885	0.0340276	0.933458	0.812618	0.000369853	0.00111537	28.723	8.88391	0.154128	0.146706	0.323733	0.347853	0.00857278	0.00484895	14.0632	8.63489	0.281769	0.205428	0.0390037	0.136171	0.00999506	0.00645922	5.5998	5.82461	-0.18926	-0.395864	0.183473	0.00403474	-0.00491447	-0.0148843	117.843	14.2661	0.152666	0.076581	0.279931	0.589471	0.00917047	0.00326067	6.41354	6.26416	-0.141407	-0.247961	0.343074	0.0928571	-0.00538561	-0.013269	3.94193
4931406G06Rik
4931407E12Rik
4931408C20Rik
4931412I15Rik
4931413K12Rik									125.247	-75.0087	0.147884	0.120124	0.343955	0.442918	0.0146257	0.0109019																									70.4261	-430.294	0.0875152	-0.0060887	0.558587	0.9676	0.00735921	-0.000524181
4931414P19Rik	24.1377	16.603	-0.45825	-0.454996	0.000720725	0.000795012	-0.0256927	-0.0249472	42.8314	39.4177	-0.0294024	-0.0882917	0.851532	0.573429	-0.00299835	-0.00672218	18.1243	31.6041	0.150741	0.0795788	0.276583	0.567317	0.00800007	0.00446424	12.3386	14.9366	-0.329575	-0.531732	0.0181921	5.93677e-05	-0.0133395	-0.0233093	18.6659	18.3688	-0.203466	-0.304753	0.147972	0.0280397	-0.00970407	-0.0156139	20.6853	18.9936	-0.224709	-0.349242	0.128878	0.0161233	-0.0146665	-0.0225499	12.4775
4931415C17Rik																	23.7465	66.1263	0.045393	-0.0212696	0.744476	0.878667	0.00228115	-0.00125468
4931417E11Rik
4931419H13Rik
4931422A03Rik	22.0258	21.5329	-0.0338591	-0.0241773	0.813529	0.866265	-0.00214257	-0.00139706	21.0258	30.5519	0.125119	0.0934755	0.42404	0.551038	0.0100532	0.0063294	11.3721	23.105	0.0535238	-0.0173037	0.700689	0.901165	0.0026961	-0.000839731	18.1881	29.5276	-0.135883	-0.313882	0.341725	0.0248958	-0.00856347	-0.0185333	18.8255	28.4687	-0.17732	-0.298032	0.208542	0.0318788	-0.00892707	-0.0148369	24.8342	38.7709	0.332681	0.216531	0.022322	0.143769	0.0199195	0.0120361	18.0315
4931428F04Rik	271.568	40.2819	0.015059	0.0267494	0.916469	0.852189	0.00113641	0.00188192	80.6589	63.9596	0.0367844	-5.33399e-05	0.814843	0.999729	0.00371944	-4.39344e-06	5.92421	8.7389	0.0695889	-0.0320502	0.617066	0.818039	0.00221571	-0.00132013	68.1212	59.3358	0.267429	0.154179	0.0578022	0.280037	0.0222864	0.0123166	60.4032	39.0435	0.158151	0.0743217	0.262805	0.60053	0.0114858	0.005576	-672.584	170.788	0.19664	0.128051	0.185246	0.391019	0.0209363	0.0130529	66.0051
4931428L18Rik	-308.897	125.713	0.114828	0.126799	0.42234	0.375261	0.014152	0.0148975	90.4043	94.347	0.00148856	-0.0285627	0.992441	0.855727	0.000189851	-0.00353398									19.4215	19.5988	-0.27227	-0.438641	0.053251	0.00128308	-0.0160204	-0.0259903									46.1438	36.4693	0.245863	0.149178	0.0957443	0.31693	0.0215652	0.0136819
4931429L15Rik																	-347.691	-56.3485	0.211298	0.20379	0.125088	0.139391	0.0289671	0.0254313
4931429P17Rik									190.699	-531.895	0.0832337	0.0607401	0.595669	0.698815	0.0140186	0.0102948
4931431B13Rik
4931440P22Rik	191.12	37.5131	0.161076	0.165318	0.258819	0.246318	0.0117581	0.0125036	62.9549	41.7494	0.0526253	0.00364347	0.737511	0.9815	0.00393459	0.000210755	73.1278	113.987	0.238688	0.227945	0.082181	0.0973663	0.0190687	0.0155328	40.1968	32.7861	0.0789384	-0.0892411	0.581896	0.533446	0.00475834	-0.0052115									-335.493	136.822	0.193954	0.10714	0.191442	0.473497	0.0175383	0.00965493	347.102
4932411K12Rik									68.2655	55.8819	0.0163197	-0.0193644	0.917274	0.901909	0.00176581	-0.00195802
4932411N23Rik
4932412D23Rik									71.9811	55.6801	-0.171879	-0.207934	0.270418	0.180892	-0.0215743	-0.0252981																																	-653.841
4932413F04Rik																	32.5366	63.85	-0.178748	-0.260367	0.195931	0.0572407	-0.0139454	-0.0174812
4932414J04Rik									142.235	185.498	0.0416891	0.0140213	0.790675	0.928892	0.00558872	0.00186489
4932414N04Rik									36.154	32.9135	0.0860394	0.0502041	0.583286	0.749187	0.00852456	0.00480073																	182.774	70.0344	0.325504	0.336104	0.0185374	0.0148469	0.0429	0.0369902	-188.418	1590.52	0.115081	0.0624396	0.441135	0.676719	0.0173108	0.00942741	809.66
4932415D10Rik									-651.78	56.6946	0.0228549	-0.00641063	0.884338	0.967456	0.00293522	-0.000788616
4932415M13Rik
4932416K20Rik
4932422M17Rik									621.373	-202.823	-0.113931	-0.153184	0.466946	0.326743	-0.0129958	-0.0167197																																	-231.754
4932429P05Rik
4932431P20Rik									-132.276	575.413	-0.194163	-0.213339	0.212175	0.169564	-0.0320954	-0.0358192
4932435O22Rik									2492.55	-707.768	-0.0333147	-0.06477	0.832044	0.679868	-0.00421615	-0.00793998
4932438A13Rik	35.366	7.12908	-0.317877	-0.362788	0.0230184	0.00888639	-0.0183912	-0.0176457	14.5977	4.39144	0.0865153	0.0269329	0.581197	0.863879	0.00459278	0.000868944	5.60275	2.88099	-0.130576	-0.310645	0.346643	0.0222406	-0.00349482	-0.00703066	10.5595	3.53967	0.228643	-0.0812139	0.106568	0.571026	0.0079626	-0.00200724	10.0315	2.55824	0.143052	-0.0975254	0.31168	0.491571	0.00409774	-0.00181207	12.2911	5.42449	-0.0444725	-0.215361	0.7666	0.146	-0.00216577	-0.0100492	10.0694
4932438H23Rik
4932441J04Rik									-125.742	-164.731	0.0475057	0.0219452	0.762265	0.888912	0.00663149	0.00290765	41.1468	63.8624	-0.0443352	-0.095654	0.750235	0.491425	-0.00250647	-0.00604231	-75.9941	-103.21	0.0633585	-0.0299317	0.658709	0.834836	0.0067999	-0.00316994	93.0198	39.6562	-0.0955938	-0.179021	0.500231	0.204141	-0.00561039	-0.0115202
4932442E05Rik
4932443L11Rik									136.384	415.927	-0.20654	-0.257308	0.1839	0.0957646	-0.024266	-0.0279898	42.7207	101.565	-0.0608719	-0.116122	0.661927	0.403049	-0.00535822	-0.00889405	763.021	-413.688	0.241701	0.178822	0.0874992	0.209286	0.0330585	0.0230887	-147.254	-149.482	0.0630464	0.00775314	0.657025	0.956497	0.00664285	0.000733048
4932702P03Rik																	-109.858	-69.2664	0.0747996	0.0490386	0.590884	0.724734	0.00861088	0.00507504
4933400A11Rik
4933400C23Rik									124.117	1061.4	-0.0979123	-0.121323	0.532208	0.438344	-0.0161991	-0.0199229
4933400F21Rik									55.2517	59.7504	-0.102572	-0.163044	0.512776	0.296182	-0.00893136	-0.0126552	38.7673	69.7665	0.0729379	0.0289635	0.600182	0.835306	0.00546714	0.00193131	109.461	144.617	0.0657121	-0.064135	0.646852	0.654787	0.00507746	-0.00489238									1953.46	218.548	0.215699	0.143627	0.145354	0.335472	0.0229794	0.015096	269.656
4933400L20Rik
4933401H06Rik
4933401J01Rik
4933402C06Rik
4933402D24Rik									111.116	61544.5	0.00499579	-0.0183721	0.974636	0.906913	0.000801189	-0.00292264	45.6184	-528.88	-0.119729	-0.184692	0.388497	0.18123	-0.0109947	-0.0145306
4933402J07Rik
4933402J10Rik									48.8137	293.328	0.210808	0.192356	0.174804	0.216542	0.0262198	0.022496
4933402J15Rik
4933402N03Rik
4933402N22Rik
4933403O08Rik
4933404G15Rik									70.6841	321.361	0.0394701	0.0132261	0.801587	0.932916	0.00566169	0.00193786
4933404I11Rik
4933404K08Rik
4933404K13Rik									159.241	-252.961	0.0519271	0.0305444	0.740872	0.845834	0.0086156	0.00489177
4933404O12Rik	-334.749	59.9978	-0.0606461	-0.0562993	0.672476	0.694762	-0.00572311	-0.00497759	33.6418	25.3983	0.210681	0.196888	0.175069	0.205704	0.0180432	0.0143194	8.60201	11.4984	-0.0144389	-0.0944265	0.917466	0.497028	-0.000508987	-0.00404482	89.0301	64.154	-0.0188111	-0.124037	0.89576	0.385832	-0.00181391	-0.0117838	-237.388	264.999	-0.151405	-0.197948	0.283967	0.159521	-0.0190062	-0.024916	14.7465	14.6549	-0.274087	-0.314534	0.0622755	0.0312988	-0.0215106	-0.029394	34.9798
4933405D12Rik									59.281	412.632	0.173797	0.140309	0.265027	0.369501	0.0210839	0.0173601																									24.0001	39.6346	0.164503	0.0620266	0.26918	0.678741	0.0135521	0.00566868
4933405E24Rik
4933406B17Rik									-201.38	-245.173	0.0886948	0.0661425	0.571673	0.673458	0.0129789	0.00925511
4933406C10Rik	661.914	121.512	0.199115	0.198809	0.161277	0.161937	0.0184909	0.0192364	126.465	560.412	-0.0696373	-0.105022	0.657241	0.502705	-0.00862237	-0.0123462	81.4433	-286.837	0.157735	0.141811	0.254645	0.306359	0.0152851	0.0117493	120.042	665.602	-0.242948	-0.350746	0.0858291	0.0116205	-0.0232679	-0.0332378
4933406D12Rik
4933406F09Rik
4933406G16Rik
4933406I18Rik	11.2032	12.6513	-0.0930086	-0.0694492	0.516237	0.628204	-0.00398937	-0.00324386	50.6013	188.952	0.0483918	0.0137648	0.757963	0.93019	0.00507021	0.00134637	22.1337	56.6771	0.202261	0.181325	0.142448	0.189457	0.0153239	0.011788	17.9572	30.9262	0.0233622	-0.12429	0.870735	0.38486	0.00151613	-0.00845371																	121.982
4933406J09Rik
4933406J10Rik
4933406K04Rik
4933406P04Rik	51.3478	53.703	0.0421652	0.04863	0.768922	0.734701	0.00351126	0.00425677									63.2455	-197.496	-0.0321499	-0.0704935	0.817482	0.612485	-0.00332898	-0.00686481	65.4987	306.246	0.0361908	-0.0629967	0.800941	0.660539	0.00378458	-0.00618526	124.944	598.672	0.0931613	0.0465588	0.511248	0.743096	0.0103428	0.00443296	197.106	-343.782	0.260691	0.194597	0.0767556	0.189947	0.0258256	0.0179422	67.0702
4933407I05Rik
4933407I08Rik
4933407K13Rik	-229.255	41.0215	-0.441853	-0.454624	0.00117013	0.00080392	-0.0368373	-0.0360918	38.7597	22.7877	-0.0301505	-0.0957184	0.847799	0.54148	-0.00214514	-0.00586898	23.5528	18.8218	0.0161517	-0.0451981	0.907716	0.745536	0.00104684	-0.00248899	38.9795	21.0042	0.0589376	-0.110158	0.681203	0.441579	0.0039086	-0.00606125	119.289	28.5102	0.119002	0.0565868	0.400759	0.690296	0.00947582	0.00356602	39.949	16.6012	0.301703	0.219337	0.0393058	0.138522	0.0197624	0.0118791	48.6794
4933407L21Rik																	20.2378	29.0172	0.291815	0.254324	0.0322691	0.0634808	0.0155319	0.0119961
4933408A14Rik
4933408J17Rik									120.24	-3237.22	-0.000450029	-0.0243295	0.997715	0.876931	-7.0002e-05	-0.00379383
4933408N05Rik
4933409D19Rik
4933409F18Rik									92.3018	326.84	0.083304	0.0600941	0.595357	0.70187	0.0112862	0.00756234
4933409G03Rik									35.8119	80.126	0.0492643	0.0169761	0.753734	0.913958	0.00559119	0.00186736									258.168	-116.696	-0.0241062	-0.103529	0.866655	0.469705	-0.00338971	-0.0133596	137.532	22063.9	0.24037	0.228963	0.0860769	0.10253	0.0371429	0.0312331
4933411E02Rik
4933411E06Rik
4933411E08Rik
4933411G06Rik
4933411K16Rik																																																	17.3696
4933411O13Rik									97.0237	495.62	0.172277	0.147043	0.269293	0.346736	0.0239984	0.0202746
4933412A08Rik	282.79	-947.798	-0.377067	-0.377533	0.00638121	0.00631111	-0.0416674	-0.0409219
4933412E12Rik									77.2979	197.414	-0.0946973	-0.154707	0.545821	0.321895	-0.00949989	-0.0132237	23.0108	65.0331	-0.00126534	-0.0585291	0.992755	0.674196	-7.3494e-05	-0.00360933	57.2672	114.781	0.173669	0.0566509	0.222927	0.692949	0.0147486	0.00477872	99.3937	120.565	0.283506	0.225279	0.0416813	0.108332	0.0261688	0.020259	101.333	113.972	-0.00467041	-0.102084	0.975145	0.494737	-0.000430434	-0.00831382	16.4162
4933412L11Rik
4933412O06Rik																	15.5651	74.9555	-0.0034029	-0.063174	0.980517	0.649956	-0.000199023	-0.00373486
4933413C19Rik
4933413J09Rik									181.847	125.279	-0.0382463	-0.0644004	0.807621	0.681597	-0.00558987	-0.0093137																									-67.3936	-225.96	0.297046	0.236293	0.0425984	0.109808	0.0301684	0.022285
4933413L06Rik									44.0464	163.128	0.142283	0.118552	0.362737	0.448951	0.0194466	0.0157228	22.6279	46.565	-0.144305	-0.191158	0.297844	0.166158	-0.0176532	-0.021189
4933414I15Rik
4933415A04Rik									240.598	-222.18	0.0299911	0.00416125	0.848594	0.978872	0.00428802	0.000564191	46.5829	956.833	-0.0787043	-0.121489	0.571596	0.381509	-0.00738907	-0.0109249																	44.3909	63.2098	-0.166676	-0.267743	0.262817	0.0688347	-0.0134049	-0.0212883
4933416E03Rik
4933416E14Rik
4933416O17Rik
4933417A18Rik																																									122.992	-236.1	-0.120223	-0.171988	0.420853	0.24769	-0.0148257	-0.0227091
4933417C20Rik									65.097	325.372	0.0318692	-0.00361387	0.839234	0.981651	0.00337308	-0.000350751																	-3472.45	-168.043	0.234385	0.223409	0.0944303	0.111371	0.0316636	0.0257538									485.299
4933417E11Rik
4933417G07Rik																	101.592	-73.341	0.235261	0.222507	0.0868071	0.105841	0.0283893	0.0248534
4933417O13Rik																																	1564.22	-226.589	0.072368	0.0292139	0.610166	0.837113	0.00948292	0.00357311	179.984	13959.3	0.302202	0.263044	0.0389655	0.074037	0.036275	0.0283917
4933421A08Rik
4933421D24Rik
4933421I07Rik
4933421O10Rik	38.5484	20.9358	-0.0966798	-0.0774337	0.49974	0.589135	-0.00527557	-0.00453005	35.0885	29.6262	-0.00675162	-0.0638422	0.965726	0.684213	-0.000548007	-0.00427184	8.74345	11.6327	0.175807	0.0714585	0.203511	0.607615	0.00633907	0.00280323	12.7464	14.4985	-0.103832	-0.314196	0.468396	0.0247438	-0.00401387	-0.0139837	33.0526	22.8607	-0.316742	-0.444051	0.0221498	0.000975212	-0.0160307	-0.0219405	23.0932	14.6684	0.376077	0.295311	0.00918105	0.0438812	0.0214431	0.0135598	19.6967
4933423L19Rik
4933423P22Rik									32.8671	18.2819	-0.0767475	-0.188413	0.624729	0.22629	-0.0046314	-0.00835523	41.9772	38.9326	0.0127083	-0.0363083	0.92733	0.79436	0.00100601	-0.00252982	778.217	120.239	0.355909	0.298855	0.0103705	0.0331474	0.0387514	0.0287816	-103.802	645.05	0.0523564	0.00186699	0.712409	0.989519	0.00609618	0.000186373	-109.468	159.792	0.184464	0.0892671	0.214514	0.550709	0.0158386	0.00795526	156.449
4933424G06Rik									356.622	-119.395	-0.0145603	-0.0433614	0.926166	0.782478	-0.0019069	-0.00563074
4933424H11Rik
4933424M12Rik
4933425B07Rik
4933425D22Rik
4933425M03Rik
4933426K07Rik									159.194	-175.376	-0.103688	-0.142366	0.508177	0.362454	-0.0150716	-0.0187954
4933427D06Rik
4933427D14Rik	80416.5	41.315	-0.0610254	-0.0532515	0.670544	0.710543	-0.0049063	-0.00416079	21.0641	10.2532	0.149037	0.151666	0.340162	0.331614	0.00876865	0.00504482	6.41339	7.11478	-0.0660059	-0.175274	0.63535	0.204906	-0.00196914	-0.00550497	17.881	12.7674	0.13624	-0.0952778	0.340447	0.506008	0.00622211	-0.00374774	31.1094	14.2041	0.0280275	-0.121098	0.843644	0.392455	0.00132987	-0.00457993	22.5136	13.445	0.246794	0.121054	0.0944549	0.417627	0.0139015	0.00601807	12.7135
4933427E13Rik									51.4802	97.5962	0.00573301	-0.0304888	0.970895	0.846111	0.000644072	-0.00307976
4933427G23Rik									92.5553	227.415	0.213968	0.203387	0.168279	0.190833	0.0251563	0.0214325	30.8444	107.316	0.170341	0.129787	0.218144	0.349592	0.0106559	0.00712008	-4625.97	-139.188	0.38658	0.343985	0.00507648	0.0134518	0.0442822	0.0343124
4933427I04Rik
4933428C19Rik
4933428G20Rik																	19.5822	83.0375	0.265486	0.219073	0.0523503	0.111478	0.0170733	0.0135375	85.3221	-308.704	0.195335	0.115265	0.169547	0.420566	0.02209	0.0121202
4933429O19Rik																	1248.73	-113.104	0.106586	0.0920024	0.443017	0.508187	0.014919	0.0113832
4933430A20Rik
4933430H06Rik
4933430H16Rik
4933430I17Rik									115.594	-473.464	-0.0154035	-0.044501	0.921903	0.776905	-0.00203416	-0.00575799
4933430M04Rik
4933430N04Rik									76.4844	89.0225	-0.108991	-0.138715	0.486603	0.375019	-0.0142946	-0.0180185									-248.575	-179.747	0.274014	0.235073	0.0516836	0.0968148	0.0438255	0.0338557
4933431C10Rik									64.5701	95709	0.170895	0.159445	0.273213	0.307114	0.0223234	0.0185996	68.1042	-108.854	0.248142	0.229736	0.0704187	0.0946938	0.0291884	0.0256526	111.709	-116.374	-0.0760795	-0.174549	0.595684	0.220554	-0.00825739	-0.0182272	149.4	-159.87	-0.0280009	-0.0930281	0.84379	0.511855	-0.00308938	-0.00899918	92.0934	-3102.58	0.268672	0.216562	0.0678414	0.143712	0.0341095	0.0262261	53.7336
4933431E20Rik	44.4857	15.1278	0.508843	0.549296	0.000137402	2.98904e-05	0.0303859	0.0311314	49.7541	21.4613	0.156902	0.149321	0.314993	0.339234	0.0115304	0.00780661	3.40864	5.10357	-0.218694	-0.234838	0.112114	0.087393	-0.00526616	-0.00880199	20.0012	14.3624	0.218416	0.0165873	0.123612	0.908026	0.0108017	0.000831807	37.9349	16.3294	0.0763188	-0.0340821	0.59075	0.810435	0.00418803	-0.00172177	7.15408	5.83518	0.0702171	-0.140725	0.639069	0.345432	0.00245221	-0.00543118	6.59615
4933431G14Rik									22.8649	35.0198	0.0717357	0.0286639	0.647577	0.855221	0.00563492	0.00191109	24.9183	67.3213	0.0395997	-0.00452974	0.776181	0.974067	0.00322622	-0.00030961									1303.79	-169.25	0.320142	0.312917	0.020683	0.0239036	0.045275	0.0393652
4933431J24Rik									198.728	380.216	0.0509641	0.0228518	0.745516	0.884354	0.00675675	0.00303291
4933431K14Rik	56.5214	82.4658	-0.286193	-0.286154	0.0417541	0.0417836	-0.0237398	-0.0229943	32.5103	106.213	0.17828	0.153082	0.252706	0.327068	0.0150988	0.011375	15.3012	54.909	0.164992	0.0930882	0.233159	0.503173	0.00969176	0.00615592	31.827	131.951	-0.241918	-0.358601	0.0872074	0.0097661	-0.0180875	-0.0280574	27.5737	71.6747	-0.0473644	-0.123041	0.738807	0.384845	-0.00290818	-0.00881798	90.3372	-1848.81	0.134998	0.0682938	0.365608	0.648301	0.0150925	0.00720916	38.9634
4933431K23Rik									76.8998	51.2619	-0.0256389	-0.0654671	0.870362	0.676609	-0.00279531	-0.00651914									327.95	87.4998	0.150744	0.056297	0.291019	0.694774	0.0143464	0.00437659	22.407	12.5502	0.190107	0.0775842	0.177046	0.58459	0.00919008	0.00328027
4933431M02Rik
4933432G23Rik
4933432I03Rik
4933432K03Rik									121.939	128.19	0.184661	0.164203	0.235839	0.292714	0.0227439	0.01902
4933433F19Rik
4933433G08Rik
4933433G15Rik
4933433G19Rik									41.0754	63.0949	0.109908	0.075503	0.482926	0.630371	0.00919238	0.00546855	31.8748	63.4925	0.124323	0.0988241	0.370419	0.477111	0.0111448	0.00760896	42.1775	64.1522	0.193731	0.0735601	0.173146	0.607953	0.0149898	0.00502	200.116	284.969	-0.103373	-0.176348	0.465838	0.211087	-0.0113876	-0.0172974	64.8166	72.5168	0.111091	0.0127861	0.457239	0.932023	0.00881476	0.000931375	119.745
4933433N18Rik
4933434E20Rik	6.46794	5.9742	-0.324961	-0.276799	0.0199819	0.0492593	-0.0142289	-0.0134834	13.5543	10.3024	0.045264	0.00208203	0.773181	0.989428	0.00385764	0.000133807	2.47252	4.44797	-0.0701271	-0.14623	0.614339	0.291376	-0.00146166	-0.00499749	2.64696	3.37713	0.30539	-0.150499	0.0293164	0.291813	0.0061081	-0.00386174	3.07807	4.79359	-0.037656	-0.169992	0.790983	0.22827	-0.000894177	-0.00680398	4.03003	3.13807	0.315744	0.0643659	0.0306192	0.667316	0.00953093	0.00164755	2.68998
4933434M16Rik
4933435F18Rik
4933435G04Rik
4933436E23Rik									67.8068	-1023.34	0.0627663	0.0368809	0.689265	0.814366	0.00899422	0.00527039
4933436H12Rik
4933436I01Rik
4933436I20Rik									54.1268	92.8919	0.0606334	0.0340329	0.699319	0.828477	0.00776423	0.0040404
4933438B17Rik
4933438K21Rik									37.6664	64.5497	-0.0645514	-0.103531	0.680891	0.508824	-0.00789084	-0.0116147																	102.944	217.068	0.245641	0.236531	0.0792103	0.0913662	0.0354957	0.0295859
4933439C10Rik	259.379	33.677	-0.319855	-0.326958	0.0221337	0.0191894	-0.0269636	-0.0262181	27.0988	17.0291	-0.129255	-0.233868	0.408761	0.131195	-0.00930279	-0.0130266	5.27812	7.3176	0.0449383	-0.0673739	0.74695	0.628343	0.0011598	-0.00237604	17.041	13.3343	-0.181161	-0.38392	0.20329	0.00541541	-0.00981351	-0.0197834	39.4062	18.1043	-0.0325961	-0.164889	0.818557	0.242749	-0.00152808	-0.00743789	31.2122	15.7953	0.31855	0.251525	0.0290903	0.0881056	0.0221879	0.0143045	12.0495
4933439K11Rik																	1905.35	-97.5312	0.217197	0.202608	0.114654	0.14175	0.0266121	0.0230763																	113.889	87.6952	-0.074611	-0.180665	0.618181	0.224269	-0.00614712	-0.0140305	-506.192
4933439N06Rik									49.1981	156.194	0.0121902	-0.0144105	0.938159	0.926924	0.00167779	-0.00204605
4933439N14Rik
4933440J02Rik
4933440M02Rik									1184.55	271.548	0.220155	0.196613	0.156019	0.206351	0.025868	0.0221441
4933440N22Rik	248.262	169.889	-0.358045	-0.341711	0.00988838	0.0141207	-0.0297975	-0.029052	80.0267	-3286.97	-0.00893019	-0.048296	0.954677	0.758428	-0.000875843	-0.00459968	160.183	-75.8578	0.115215	0.0785227	0.40676	0.572487	0.0115548	0.00801902	91.6094	-1503.59	-0.0842258	-0.191511	0.556783	0.17822	-0.00819788	-0.0181677									66.9522	134.39	-0.125343	-0.243408	0.401197	0.0992117	-0.00956917	-0.0174526
5031410I06Rik
5031415H12Rik																	27.4063	58.6925	0.024369	-0.0229668	0.86115	0.869067	0.00185985	-0.00167599
5031425E22Rik	7.66996	5.31726	-0.472595	-0.452188	0.000462222	0.000864566	-0.0157706	-0.0150251	18.8729	13.5167	-0.0126944	-0.0780421	0.935606	0.618881	-0.000952031	-0.00467586	5.38286	6.3921	-0.119056	-0.22373	0.391188	0.103888	-0.00313716	-0.00667299	6.59561	6.93791	-0.329971	-0.564938	0.0180448	1.5692e-05	-0.0098323	-0.0198021	9.20332	8.70679	-0.270593	-0.358161	0.0523544	0.00913219	-0.00927063	-0.0151804	9.90354	6.08615	0.219084	0.0275084	0.13899	0.854371	0.00876098	0.000877591	7.5586
5031425F14Rik									117.004	-706.26	0.248519	0.208459	0.108065	0.179768	0.0279985	0.0242746									26.0905	44.9107	0.459548	0.303592	0.000692874	0.0303316	0.0269893	0.0170195									6968.68	-265.775	0.0640019	0.00295292	0.669089	0.984283	0.00823994	0.000356551
5031434C07Rik																																	-2210.6	302.823	-0.00449202	-0.0735864	0.974787	0.604149	-0.000430673	-0.00634048
5031434O11Rik	36.4633	20.6663	-0.302103	-0.303296	0.0311944	0.0305016	-0.0209851	-0.0202396	59.4257	45.5376	0.246647	0.290596	0.110834	0.0586997	0.0235037	0.0197799	10.1471	12.5179	0.121302	0.0431816	0.382251	0.756532	0.00552698	0.00199115	15.9273	16.4398	-0.297409	-0.463302	0.0340494	0.000617711	-0.0165953	-0.0265651	106.658	58.2701	-0.0940309	-0.173849	0.507296	0.217733	-0.00769181	-0.0136016	51.4813	31.8448	0.436352	0.371835	0.00216786	0.0100665	0.031795	0.0239116	64.5743
5031439G07Rik	10.7295	6.37822	-0.107955	-0.0921842	0.450821	0.519979	-0.0051163	-0.00437079	23.2519	13.7815	0.0939528	0.0729221	0.548997	0.642138	0.00980851	0.00608468	4.01096	5.23712	0.13866	0.0072315	0.317339	0.95861	0.00383061	0.000294777	8.94484	5.98768	0.664185	0.501631	1.07407e-07	0.000176828	0.0299188	0.019949	9.30473	8.39137	0.159445	-0.00248795	0.258869	0.986034	0.00578137	-0.00012843	7.57094	5.0438	0.224114	-0.0159925	0.129921	0.915032	0.00734293	-0.000540454	7.03285
5033403F01Rik
5033403H07Rik
5033404E19Rik
5033406O09Rik									34.8454	63.699	0.0399581	-0.00143482	0.799184	0.992714	0.00361351	-0.000110326																									9.23913	14.2114	-0.174274	-0.266267	0.241365	0.0704367	-0.00793534	-0.0158187
5033417F24Rik																	23.8784	209.54	-0.256985	-0.286334	0.0606688	0.0358121	-0.0149782	-0.018514																									84.1392
5033421B08Rik																									71.068	-1386.6	0.627388	0.552959	8.35854e-07	2.57788e-05	0.0797561	0.0697863
5033423K11Rik																																									61.7984	144.491	-0.0664697	-0.120632	0.657105	0.419263	-0.00852002	-0.0164034
5033430I15Rik	36.7442	62.6546	-0.249627	-0.233141	0.0772982	0.0996691	-0.0263794	-0.0256339	88.5781	-58.7151	0.267934	0.233481	0.0823688	0.131853	0.024313	0.0205892	17.2178	127.295	-0.235691	-0.266499	0.0862167	0.0514239	-0.0155362	-0.019072	25.5779	128.592	-0.188567	-0.305359	0.185111	0.0293333	-0.0143601	-0.0243299	18.5904	47.376	0.0980124	0.00462372	0.4894	0.974048	0.0062568	0.000346995	45.0124	754.123	0.0851153	0.000904302	0.569463	0.995187	0.00797207	8.86801e-05	15.4517
5330406M23Rik	14.6744	13.5092	0.413517	0.428351	0.00256002	0.00171349	0.0201083	0.0208538	17.6244	22.2897	0.417864	0.413628	0.00530021	0.00583196	0.0266187	0.0228948	14.4044	19.7018	-0.00613703	-0.0580105	0.96487	0.676924	-0.000473357	-0.00400919	10.4473	12.515	0.334069	0.141682	0.0165812	0.321324	0.0166399	0.00667002	15.5115	15.2684	0.289832	0.216545	0.0371448	0.12309	0.0167142	0.0108044	28.9481	29.0982	0.484598	0.464723	0.000556894	0.000998584	0.0400038	0.0321204	17.4489
5330409N07Rik																	39.7176	59.8713	-0.0109757	-0.0644228	0.937216	0.643498	-0.00089905	-0.00443488																	-177.661	-580.58	0.265731	0.205857	0.0710248	0.165076	0.0334064	0.025523
5330411J11Rik
5330413P13Rik																	53.7076	47.8533	0.0811741	0.026464	0.559548	0.849346	0.005079	0.00154317
5330416C01Rik									97.563	110.914	-0.189342	-0.229642	0.223965	0.138509	-0.0189474	-0.0226712	45.2596	76.2837	0.0607309	0.0189359	0.662663	0.891896	0.00491323	0.0013774
5330425B07Rik
5330426L24Rik
5330431K02Rik									49.9695	124.427	0.130199	0.096018	0.405318	0.540209	0.0133392	0.00961534	9.7866	13.1078	-0.138647	-0.207936	0.317387	0.131348	-0.00880976	-0.0123456	25.7164	40.5987	-0.0421405	-0.196113	0.769054	0.167821	-0.00297178	-0.0129416	46.1465	58.4713	-0.0439319	-0.13373	0.757135	0.344581	-0.00361401	-0.00952382									357.315
5330434G04Rik									194.458	87.5904	-0.030849	-0.0576722	0.844316	0.713363	-0.00431545	-0.00803928	6.9424	5.94912	0.0324099	-0.0532377	0.816032	0.702215	0.00144345	-0.00209239									-151.863	234.545	0.0586168	0.0225312	0.679774	0.874027	0.00888097	0.00297116
5330437M03Rik																																	-105.109	-277.484	0.0293217	-0.0219075	0.836521	0.877487	0.00349308	-0.00241672
5330438D12Rik	58.4287	41.4315	-0.359574	-0.338664	0.00955527	0.0150614	-0.0284106	-0.0276651	54.1489	84.3598	-0.00322245	-0.0394751	0.983638	0.801562	-0.000354235	-0.00407807	9.26662	18.012	0.00288076	-0.0649655	0.983506	0.6407	0.000118418	-0.00341742	24.4494	36.0156	-0.408784	-0.522584	0.00289905	8.36255e-05	-0.0260052	-0.035975	97.8293	118.795	-0.159314	-0.221509	0.259267	0.114526	-0.013296	-0.0192058	37.4488	35.5401	0.0805395	-0.0218648	0.590468	0.884017	0.00635008	-0.00153331	35.2891
5330438I03Rik
5330439A09Rik
5330439B14Rik																																	345.432	-144.933	0.140502	0.102253	0.320474	0.470708	0.0178685	0.0119587
5330439K02Rik									283.748	-381.663	-0.01721	-0.0417331	0.912777	0.790459	-0.00269867	-0.00642251	33.0331	96.541	0.0635972	0.0213123	0.647765	0.878425	0.00499308	0.00145724	2239.06	-108.101	0.348773	0.261655	0.0121315	0.0636355	0.0324467	0.0224769																	-1143.01
5430400D12Rik									103.097	-204.466	0.0706735	0.0401025	0.652462	0.798473	0.00757969	0.00385585	15.928	40.6686	-0.0274428	-0.0817435	0.843842	0.556788	-0.00165902	-0.00519485	84.1637	-425.199	0.164083	0.0647515	0.249917	0.651681	0.0159629	0.00599301																	63.3566
5430401F13Rik
5430401H09Rik	-216.457	116.791	-0.13618	-0.132647	0.340663	0.353453	-0.0133597	-0.0126142	20.5319	19.0519	-0.108519	-0.171106	0.488507	0.27261	-0.00920098	-0.0129248									-489.894	-352.541	0.0770882	0.00110771	0.590803	0.993845	0.0101015	0.000131692
5430402O13Rik									52.9148	-344.964	0.111717	0.0873572	0.475705	0.57751	0.0126046	0.00888074	26.2199	611.98	0.104802	0.0694315	0.450735	0.617864	0.00905427	0.00551844	20.6859	80.2043	-0.00626592	-0.169502	0.965192	0.234399	-0.000391905	-0.0103617																	34.6878
5430402P08Rik									65.5054	-831.199	0.0027714	-0.0252994	0.985928	0.872065	0.000370936	-0.0033529
5430403G16Rik									36.0188	33.8255	0.381709	0.412978	0.0115463	0.00591747	0.0328057	0.0290819	29.3602	37.0122	0.252825	0.24806	0.065111	0.0705144	0.0240482	0.0205123	32.9732	30.0001	0.536043	0.480144	5.03414e-05	0.000362997	0.0379278	0.0279579	106.342	60.638	0.17669	0.136758	0.21019	0.333668	0.0162146	0.0103048	95.7356	61.3224	0.378356	0.329019	0.00873352	0.0239345	0.0359006	0.0280172	26.9869
5430403N17Rik
5430405H02Rik	81.9783	31.929	-0.17899	-0.163239	0.20885	0.252392	-0.0123166	-0.0115711	74.2187	61.4796	0.046124	0.00314971	0.768988	0.984007	0.00393627	0.000212438	22.3825	39.133	-0.0322021	-0.0866916	0.817191	0.533075	-0.00164003	-0.00517586	33.7518	33.903	0.0462948	-0.149925	0.747007	0.293678	0.00229794	-0.0076719	621.692	82.0407	0.0857163	-0.0131586	0.545713	0.926233	0.00512378	-0.000786021	89.7652	47.3354	0.26139	0.170525	0.0759397	0.251797	0.0201785	0.0122951	65.6134
5430414B19Rik																									49.2756	-294.141	0.149638	0.0666193	0.294613	0.642305	0.0175484	0.00757852
5430416N02Rik									48.2408	41.1317	0.0766053	0.0282698	0.625372	0.857191	0.00551071	0.00178688	22.3063	32.1147	0.160555	0.0853991	0.246143	0.539221	0.00748901	0.00395317	76.7351	59.4437	0.138848	-0.0114341	0.331195	0.936529	0.00928639	-0.000683455	-159.641	1535.17	0.230333	0.201916	0.100434	0.151152	0.0246429	0.0187331	76.7705	37.0072	0.162957	0.0720499	0.273767	0.630321	0.0126182	0.00473484	-955.357
5430420F09Rik																	38.4972	294.204	0.194177	0.178226	0.159442	0.197262	0.0178968	0.014361
5430421F17Rik
5430425E15Rik
5430425K12Rik	90.7343	104.35	-0.259966	-0.276735	0.0654284	0.049314	-0.0322741	-0.0315286	38.8748	129.11	0.117434	0.0822394	0.453269	0.600085	0.0107353	0.00701151									65.5425	-876.389	0.0130881	-0.100575	0.92737	0.48254	0.00124352	-0.00872633
5430427M07Rik									21.9208	55.5049	0.0991947	0.0543185	0.526825	0.72938	0.00754673	0.0038229									103.118	-123.323	0.269473	0.205027	0.0558441	0.148945	0.0322818	0.022312
5430427N15Rik																																																	84.9678
5430430B14Rik																									93.2451	-366.317	-0.316742	-0.382521	0.0235392	0.00560148	-0.0332824	-0.0432523
5430430K15Rik
5430431A17Rik									35.5785	92.8627	0.206664	0.195043	0.18363	0.210069	0.0181454	0.0144216	38.2641	326.604	0.0332658	-0.00111898	0.811261	0.993593	0.00342761	-0.000108223	34.2033	119.279	0.0398441	-0.10273	0.78132	0.473159	0.00287378	-0.00709606	17.9758	24.5796	0.148749	0.0559833	0.292599	0.693435	0.00936285	0.00345305	68.3669	203.647	0.25134	0.189399	0.0883481	0.202286	0.0261271	0.0182437	79.6375
5430434F05Rik	-164.791	168.362	0.136917	0.144457	0.338029	0.31184	0.0141137	0.0148592	34.7621	29.2936	0.102074	0.0688496	0.514836	0.660883	0.00771504	0.00399121	31.4052	45.3952	-0.164583	-0.239573	0.234337	0.0810175	-0.012016	-0.0155518	43.9027	40.6936	0.241865	0.120016	0.087279	0.401541	0.0175616	0.00759176	723.652	152.403	0.090001	0.0395109	0.525742	0.780936	0.00975592	0.00384611	39.8514	27.8048	0.0089973	-0.106567	0.952138	0.475879	0.00068703	-0.00719636	77.0071
5430434I15Rik									70.9636	-670.563	-0.0598687	-0.102382	0.702936	0.513564	-0.00792255	-0.0116464
5430435K18Rik
5430437J10Rik									51.7052	130.023	0.00856215	-0.0287951	0.956543	0.854566	0.000873408	-0.00285042
5530400C23Rik
5530400K19Rik
5530401A14Rik									184.43	139.604	0.181125	0.154925	0.245088	0.321206	0.0253868	0.0216629	24.2871	23.8055	0.00712109	-0.0399944	0.959242	0.774008	0.000609444	-0.00292639
5530402G07Rik
5530601H04Rik	30897.4	24.295	-0.223889	-0.215099	0.11425	0.129561	-0.0159193	-0.0151738	33.073	15.3449	-0.090174	-0.183944	0.565251	0.237697	-0.00692403	-0.0106479	10.2781	9.44497	-0.118403	-0.191669	0.393809	0.165006	-0.00435634	-0.00789217	28.6452	13.9437	-0.0351717	-0.257037	0.806437	0.0686321	-0.00180288	-0.0117727	175.849	24.4986	-0.101958	-0.216857	0.471997	0.12254	-0.00776139	-0.0136712	44.6988	15.0372	0.130396	0.0159752	0.382328	0.915124	0.00878652	0.000903131	32.3958
5730403I07Rik
5730405O15Rik	207.386	179.827	-0.0500121	-0.0455558	0.727448	0.750915	-0.00567704	-0.00493153	46.1986	105.479	0.0247551	-0.0160497	0.874795	0.918638	0.0024323	-0.00129154	12.955	28.9899	0.100053	0.0272603	0.471621	0.844868	0.00484035	0.00130451	21.6948	44.2744	-0.334029	-0.432347	0.0165952	0.00153307	-0.0204347	-0.0304045	80.7799	188.104	-0.0714546	-0.140027	0.614693	0.322128	-0.0067107	-0.0126205	128.098	2254.68	0.0020684	-0.0772774	0.988991	0.605649	0.000203058	-0.00768033	40.0726
5730408A14Rik
5730409E04Rik	27.5571	21.0306	0.270456	0.267161	0.0549212	0.058063	0.0167714	0.0175169	50.2612	58.2614	0.0409372	0.00806154	0.794369	0.959082	0.00448431	0.000760475	4.8765	9.05938	-0.0288514	-0.0892151	0.835935	0.521175	-0.000960898	-0.00449673	7.56764	10.5426	0.189027	-0.0745891	0.184022	0.602929	0.0066632	-0.00330665	9.42809	12.4599	0.090537	-0.0595165	0.523269	0.675129	0.00311369	-0.00279611	570.55	343.651	0.222192	0.185184	0.133332	0.212696	0.0320473	0.0241639	36.3149
5730412P04Rik
5730414N17Rik																	70.6513	-140.262	-0.0927114	-0.119147	0.50491	0.390823	-0.0108738	-0.0144096	53.1167	-953.348	-0.256105	-0.36258	0.0696782	0.00892837	-0.0212088	-0.0311787																	85.1886
5730419F03Rik
5730420D15Rik									138.792	-188.063	0.182472	0.164781	0.241536	0.290995	0.0315447	0.0278208																									44.074	180.085	-0.154891	-0.249092	0.298538	0.091328	-0.0138636	-0.021747
5730455P16Rik	6.58571	4.21817	-0.0976745	-0.0879877	0.495317	0.539233	-0.00333341	-0.00258789	18.4903	12.5662	0.110723	0.0865167	0.479665	0.581191	0.00875771	0.00503388	2.62815	4.37295	0.0643382	-0.0673388	0.643935	0.628522	0.00132599	-0.00220985	3.78828	4.11138	0.359357	-0.0854364	0.00960191	0.551106	0.00780455	-0.00216529	3.94393	5.98687	0.220543	-0.0193825	0.116156	0.891518	0.00510785	-0.000801955	11.5186	6.83293	0.518349	0.453034	0.000189795	0.00138539	0.0233881	0.0155047	5.28592
5730460C07Rik									116.74	-162.212	0.174966	0.163597	0.261776	0.294524	0.0173835	0.0136596
5730480H06Rik	103.118	13.5311	-0.053496	-0.0415549	0.709272	0.772176	-0.00268482	-0.00193931	19.0731	8.38155	0.144186	0.0952255	0.356288	0.543574	0.00694554	0.00322171	10.7975	5.98807	0.0513435	-0.0678971	0.712343	0.625671	0.00184253	-0.0016933	22.1826	9.1079	0.0599388	-0.23297	0.676084	0.0999243	0.00257066	-0.00739918	48.9654	11.5396	0.161479	0.0922504	0.252765	0.515405	0.00953669	0.00362688	27.9589	9.66516	0.238608	0.0883917	0.10627	0.554639	0.0113102	0.0034268	19.5333
5730488B01Rik									71.3811	137.69	-0.0073828	-0.0462639	0.962524	0.768306	-0.000885455	-0.00460929
5730507A11Rik	204.458	63.3732	0.0551626	0.0634585	0.700633	0.658203	0.00598135	0.00672686	35.5144	30.019	0.0768733	0.0403354	0.624159	0.797328	0.00606407	0.00234024	31.3666	44.182	0.0913681	0.0531944	0.511128	0.702445	0.00672713	0.00319129	94.0078	100.407	0.196116	0.0902595	0.167814	0.528767	0.0162298	0.00625991	90.0106	49.625	0.424146	0.441537	0.00172678	0.00105019	0.0342123	0.0283025	22.7851	18.1336	0.13197	-0.00731118	0.376559	0.9611	0.00749788	-0.000385502	55.676
5730507C01Rik																	138.585	-168.597	-0.13012	-0.180165	0.348346	0.19235	-0.0156297	-0.0191655	47.3805	72.6066	0.503485	0.410769	0.000165814	0.0027523	0.040441	0.0304711
5730521K06Rik																	91.8478	-91.6825	0.227416	0.206346	0.0981676	0.134391	0.0249097	0.0213739																	106.314	335.284	0.102204	0.0502151	0.494225	0.737475	0.0153838	0.00750042
5730522E02Rik									73.283	47.6591	-0.032749	-0.0690798	0.834856	0.659818	-0.00366715	-0.00739098	22.372	16.0285	0.169916	0.150651	0.21931	0.276875	0.0099141	0.00637827									-331.169	91.7407	0.108905	0.0720818	0.442175	0.611583	0.0128413	0.00693151									-235.999
5730585A16Rik																									77.4499	-177.831	0.177185	0.100576	0.213552	0.482534	0.0216266	0.0116567
5730596B20Rik
5830405F06Rik
5830408C22Rik									54.0465	44.336	0.149254	0.11089	0.339452	0.478996	0.0106387	0.0069149	59.7177	117.767	0.322371	0.302535	0.0174374	0.0261796	0.0212587	0.0177228	57.282	45.3954	0.505193	0.394475	0.000156223	0.00417754	0.0343637	0.0243938	-510.65	167.35	0.17122	0.131233	0.224878	0.353747	0.0182891	0.0123793	152.949	60.4399	0.110064	0.0175951	0.461437	0.906554	0.0093363	0.00145292	-140.912
5830416I19Rik									58.1051	97.597	0.133979	0.100148	0.391699	0.522842	0.0133414	0.00961754
5830417I10Rik	93.3684	20.2233	0.125294	0.15177	0.380999	0.287709	0.00826952	0.00901504	46.2644	24.1386	-0.0382611	-0.111274	0.807548	0.477467	-0.00311047	-0.00683431	11.6306	11.3443	-0.234363	-0.327448	0.0880526	0.0156498	-0.00867216	-0.012208	24.4508	15.756	0.11436	-0.0778722	0.424247	0.587021	0.0062023	-0.00376754	18.1561	13.4593	-0.0544234	-0.152345	0.701574	0.280955	-0.00268424	-0.00859404	34.4878	17.3557	0.384361	0.280573	0.00764377	0.0560972	0.0243986	0.0165152	27.2576
5830418P13Rik									199.473	-1947.8	0.172761	0.149142	0.267929	0.339818	0.0201052	0.0163813	179.337	-103.216	0.0593113	0.0256172	0.67009	0.854113	0.00568426	0.00214843									-215.567	-207.011	0.0265019	-0.0240576	0.852056	0.865569	0.0032718	-0.002638
5830428M24Rik									27.4161	29.0229	0.264892	0.262655	0.0860447	0.0888277	0.0206777	0.0169539																									276.683	230.975	0.181143	0.122626	0.223025	0.41156	0.0220614	0.014178
5830432E09Rik									38.1261	19.7346	0.113601	0.102337	0.468248	0.513749	0.00987116	0.00614732	-229.812	-249.879	0.119858	0.0972922	0.387984	0.484	0.0131239	0.0095881	224.944	62.6295	0.211577	0.094714	0.136111	0.50854	0.0170192	0.00704931	-99.2262	259.745	0.283819	0.270133	0.0414462	0.0527724	0.0308773	0.0249675	-94.0692	478.492	0.0202434	-0.0445989	0.892566	0.765956	0.00242081	-0.00546258
5830437K03Rik
5830444B04Rik	-77.1756	349.351	0.251843	0.255017	0.0746203	0.0709144	0.0316044	0.0323499	70.4372	41.0772	0.0558064	0.0204941	0.722259	0.896216	0.00532662	0.00160279	17.8053	15.3138	-0.160376	-0.274392	0.246677	0.0446539	-0.00872519	-0.012261	674.187	142.003	0.28854	0.216809	0.0400334	0.126467	0.0345791	0.0246093	514.216	51.4902	0.173521	0.132796	0.218616	0.347992	0.01555	0.00964018	384.407	58.8262	0.315433	0.231399	0.0307927	0.117583	0.0287991	0.0209157	407.599
5830444F18Rik									30.5971	42.4513	0.17243	0.173178	0.268863	0.266758	0.0133224	0.00959853																	377.947	-452.16	-0.0674012	-0.131131	0.634956	0.354124	-0.00782194	-0.0137317
5830448L01Rik	54.1164	82.034	-0.0733037	-0.0656033	0.609208	0.647398	-0.00643183	-0.00568632	41.8704	106.806	-0.19042	-0.259102	0.221292	0.0933926	-0.0236404	-0.0273642	26.7349	687.512	0.210601	0.146865	0.126367	0.289263	0.0159305	0.0123947	36.7794	150.574	-0.15358	-0.267868	0.281931	0.0573769	-0.0136097	-0.0235795	773.189	-104.11	-0.018099	-0.0670781	0.898662	0.636583	-0.00210402	-0.00801382	16.5384	30.7103	-0.193682	-0.293406	0.192078	0.0453253	-0.0111544	-0.0190378	26.0239
5830454E08Rik	40.3509	113.817	-0.0829153	-0.0727427	0.562959	0.611958	-0.0082668	-0.00752129	85.1626	-93.4524	0.249714	0.239748	0.106325	0.121505	0.0341371	0.0304133																																	37.9818
5830462I19Rik									-4549.76	-455.278	0.20826	0.198154	0.180193	0.202746	0.0322464	0.0285226
5830462O15Rik																	232.875	-74.3627	0.093493	0.0652225	0.50131	0.639377	0.0118976	0.00836173	215.457	-126.866	-0.222009	-0.310083	0.117403	0.0267991	-0.0249543	-0.0349241									221.204	-347.585	0.182568	0.124775	0.219343	0.403351	0.0229656	0.0150822
5830468F06Rik
5830487J09Rik									80.5138	471.947	-0.183801	-0.245372	0.238066	0.11275	-0.0176732	-0.021397	89.9196	-167.978	0.231199	0.221714	0.0925537	0.107123	0.0242551	0.0207193																									76.1372
5930403N24Rik									218.767	97.4972	0.02938	-0.0130927	0.851644	0.93359	0.00269973	-0.0010241	108.438	174.775	-0.113239	-0.179648	0.414907	0.193652	-0.0084645	-0.0120003	-254.639	941.424	0.0490446	-0.0594947	0.732523	0.678353	0.00453499	-0.00543485
5930409G06Rik																	22.2869	111.92	0.175158	0.126057	0.205211	0.363728	0.011576	0.00804016
5930420M18Rik									60.9356	161.595	-0.0302637	-0.0780859	0.847234	0.618684	-0.00275344	-0.00647727	41.5864	392.1	-0.0165349	-0.067463	0.905536	0.627887	-0.00128944	-0.00482527									7225.57	-346.822	-0.139057	-0.205083	0.325526	0.144709	-0.0142803	-0.0201901	103.886	161.672	0.171743	0.0855909	0.248376	0.5673	0.0156208	0.00773746	138.944
5930430L01Rik	36.4257	20.3648	-0.0877556	-0.0812565	0.540308	0.570823	-0.00650641	-0.0057609	45.3835	35.6982	0.137806	0.112403	0.378187	0.472982	0.0105213	0.00679743	18.9681	23.8706	0.249962	0.192167	0.0683163	0.163892	0.012239	0.00870314	21.2867	21.078	-0.28794	-0.435837	0.0404675	0.00138958	-0.0181239	-0.0280938	22.9074	18.2148	0.362228	0.229511	0.00831894	0.101687	0.0177804	0.0118706	55.1146	32.6588	0.567633	0.498914	3.16832e-05	0.000357585	0.0413233	0.0334399	13.318
5930435M05Rik
5930438M14Rik									130.506	582.61	0.0415926	0.015679	0.791149	0.92051	0.00606719	0.00234335	79.4836	13765.3	0.128462	0.109271	0.354573	0.431546	0.0161386	0.0126027
6030400A10Rik									36.2872	106.277	0.189909	0.160707	0.222558	0.303252	0.0217293	0.0180054	14.4898	36.399	0.101926	0.0530131	0.463322	0.703413	0.00628875	0.00275292	34.3508	110.666	0.115313	0.0109876	0.420373	0.939002	0.0109757	0.00100587	58.3994	253.267	0.0149735	-0.0489776	0.916093	0.730242	0.00154993	-0.00435988	32.4325	64.6181	0.103674	0.017688	0.488006	0.906063	0.00934734	0.00146395	22.9163
6030407O03Rik									228.61	-492.315	-0.000716228	-0.0284509	0.996363	0.856286	-9.60019e-05	-0.00381983
6030440G07Rik
6030442K20Rik									63.3212	249.133	0.250037	0.223436	0.105859	0.149789	0.0212238	0.0174999	34.3789	196.024	0.156696	0.112539	0.257829	0.417816	0.0112594	0.00772352									-625.098	-211.257	0.00193316	-0.0499096	0.989148	0.725308	0.000234063	-0.00567574									327.923
6030443J06Rik	-87.2767	68.9181	0.0495988	0.0592189	0.729615	0.679764	0.00507067	0.00581618	108.52	36.2005	-0.0089516	-0.0654875	0.954568	0.676514	-0.000693762	-0.00441759	57.1258	32.3727	-0.00350719	-0.0742626	0.97992	0.593559	-0.000218022	-0.00375386	70.4283	22.3947	0.288004	0.0865995	0.0404213	0.545678	0.0136042	0.00363435	-15244.9	28.1495	0.20656	0.145976	0.141775	0.30179	0.0134449	0.00753512	-114.671	101.393	0.38033	0.340489	0.00836142	0.0191872	0.0416591	0.0337757	71554
6030445D17Rik																									196.404	-155.999	0.0228656	-0.0634252	0.873459	0.658371	0.00269574	-0.0072741									38.7166	70.4841	-0.319447	-0.385731	0.0286152	0.00741223	-0.0255403	-0.0334237
6030458C11Rik	10.3381	5.4865	-0.147839	-0.143811	0.300525	0.314031	-0.00509117	-0.00434566	18.1634	11.6592	0.0119884	-0.0422016	0.939181	0.788161	0.0010316	-0.00269224	3.94411	5.75073	0.106219	-0.0340289	0.444598	0.807014	0.00240328	-0.00113255	6.70749	4.2122	0.149396	-0.251948	0.295405	0.0744961	0.00442907	-0.00554077	6.24424	7.02233	0.0921314	-0.0915693	0.515949	0.518524	0.00235899	-0.00355081	9.63928	4.90612	0.475142	0.418901	0.000738487	0.00338308	0.0198731	0.0119897	7.35083
6030460B20Rik									67.5075	-297.348	0.0732124	0.0478869	0.64081	0.760414	0.00954281	0.00581898
6030468B19Rik									29.5057	62.0704	0.260019	0.2476	0.0921971	0.109417	0.0317968	0.028073
6030469F06Rik
6030471H07Rik
6030498E09Rik
6230400D17Rik	93.8537	53.4431	0.136368	0.149895	0.339989	0.293778	0.0105792	0.0113247	73.2478	214.488	0.074985	0.035824	0.632726	0.819596	0.00679439	0.00307056	23.1127	58.0581	0.20127	0.140382	0.144456	0.311309	0.0120747	0.00853882	33.9332	51.7674	0.0954826	-0.0714774	0.50509	0.618178	0.00590067	-0.00406917	33.5284	41.9711	0.143912	0.0435363	0.30875	0.759256	0.00905529	0.00314549	246.794	369.277	-0.0595227	-0.141976	0.69105	0.341117	-0.00645543	-0.0143388	67.2792
6330403K07Rik									100.298	-358.79	-0.115112	-0.152159	0.462311	0.330028	-0.0149555	-0.0186794	1.93012	4.158	-0.0511061	-0.121969	0.713616	0.379619	-0.00114304	-0.00467887																	53.2338	87.253	0.328785	0.293733	0.0240407	0.0450753	0.0388529	0.0309695
6330403L08Rik	733.973	39.3628	-0.160119	-0.148097	0.261695	0.299671	-0.0132106	-0.0124651									36.4956	43.064	-0.280047	-0.290587	0.0402669	0.0330364	-0.0213747	-0.0249105	439.649	99.1518	-0.165589	-0.27534	0.245534	0.0505179	-0.0127336	-0.0227034	33.6443	21.777	-0.232462	-0.291117	0.0972446	0.0362754	-0.0113725	-0.0172823	-103.03	273.14	0.0490059	-0.030075	0.743579	0.840951	0.00494843	-0.00293496
6330409D20Rik									108.63	-157.202	0.0540402	0.0231518	0.730715	0.882846	0.00635379	0.00262996	31.3336	1019.67	0.0136887	-0.0292332	0.92174	0.833794	0.00112091	-0.00241492									255.766	-178.693	0.086493	0.0416009	0.542066	0.769657	0.0106887	0.00477888
6330410L21Rik									401.55	452.124	-0.0870047	-0.111275	0.579052	0.477465	-0.0134512	-0.0171751	741.41	-203.762	0.196386	0.193219	0.154658	0.161551	0.0257286	0.0221927									1006.2	118.194	0.133974	0.0807278	0.343693	0.569414	0.0129436	0.00703377									19.8299
6330411D24Rik																	55.4216	-158.149	0.328182	0.311263	0.0154045	0.0219619	0.0324	0.0288642
6330415B21Rik																	19.6661	30.6767	-0.138294	-0.200783	0.318632	0.145448	-0.011357	-0.0148928
6330418K02Rik	207.119	1002.14	-0.117607	-0.111046	0.411124	0.437883	-0.0157098	-0.0149643									30.7599	-770.009	0.0115962	-0.0326057	0.933674	0.81494	0.000908643	-0.00262719	68.4674	-520.436	0.021935	-0.0700055	0.87857	0.625447	0.00234825	-0.0076216																	40.2295
6330419E04Rik																	31.5206	146.519	0.0454987	0.0138692	0.743901	0.920711	0.00495785	0.00142202
6330420H09Rik
6330549D23Rik	-101.419	75899.4	0.088586	0.0944411	0.536467	0.509767	0.00955325	0.0102988	92.1663	112.312	0.121758	0.104824	0.436692	0.503514	0.0117079	0.00798404	28.9912	48.2494	0.0485802	-0.00489707	0.727207	0.971965	0.00324385	-0.00029198	55.6506	68.1012	0.165556	0.0200644	0.245631	0.888857	0.0112825	0.0013127	-1361.02	413.608	0.0156711	-0.0426851	0.912199	0.763825	0.0016566	-0.0042532	-202.497	-680.533	0.4803	0.420563	0.000633753	0.00324587	0.0450219	0.0371385	-1987.4
6330562C20Rik									64.68	-237.699	0.227561	0.222942	0.142218	0.150716	0.0266337	0.0229099	87.9781	-71.3803	0.214055	0.185	0.120125	0.18049	0.0251855	0.0216497	29.0483	543.871	0.201061	0.0447161	0.157139	0.755363	0.0128527	0.00288289
6330576A10Rik																	32.1814	109.127	0.0283533	-0.014502	0.838729	0.917107	0.00246712	-0.00106872
6430511E19Rik	16.7767	12.26	-0.378851	-0.376177	0.00611642	0.0065171	-0.0257987	-0.0250532	22.6002	17.3375	0.0753848	0.0337006	0.630908	0.830127	0.00561398	0.00189015	9.42123	10.9546	-0.293731	-0.368142	0.0311019	0.00616467	-0.0144091	-0.0179449	14.5632	13.7956	-0.128678	-0.340566	0.368166	0.0144681	-0.00651663	-0.0164865	13.8805	12.7136	0.0450657	-0.0775927	0.751065	0.584549	0.00205419	-0.00385561	12.7892	9.43535	0.28264	0.145568	0.0542344	0.328914	0.0141664	0.00628297	13.0395
6430548M08Rik	39.7234	13.739	0.000933026	0.01497	0.994815	0.916961	5.75343e-05	0.000803047	21.0482	15.4933	0.0373783	0.00648182	0.811907	0.967095	0.00437321	0.000649377	2.62334	3.9158	0.0324483	-0.071375	0.815818	0.608036	0.000810637	-0.0027252	8.55116	6.32144	0.387827	0.140169	0.00492419	0.32657	0.0147767	0.00480688	8.68953	8.63339	0.370341	0.147563	0.00688243	0.296506	0.0131473	0.00723753	22.9592	12.3602	0.436639	0.383589	0.00215165	0.00777684	0.0300548	0.0221714	10.6426
6430550D23Rik	45.599	15.2599	-0.0413075	-0.0285617	0.773497	0.842298	-0.00201672	-0.00127121	133.75	82.2014	-0.0139231	-0.052192	0.929389	0.739597	-0.00151612	-0.00523995	148.54	212.447	0.0794607	0.0533547	0.567894	0.70159	0.00864287	0.00510704	54.716	35.2125	0.146543	-0.0112279	0.304829	0.937671	0.00931885	-0.000650996	-129.973	-1230.7	0.0340686	-0.00420826	0.810509	0.976379	0.00533416	-0.000575642	-433.942	101.537	0.132307	0.0446419	0.375331	0.765736	0.0121351	0.00425176	217.906
6430562O15Rik	-94.4679	86.4195	0.344174	0.354659	0.0133974	0.0106619	0.033805	0.0345505	185.31	77.7607	-0.0973969	-0.140143	0.53438	0.370074	-0.0105326	-0.0142564	95.7726	78.1871	0.219645	0.216769	0.110523	0.115388	0.0217949	0.0182591	121.385	49.8095	0.117582	-0.00458451	0.411225	0.974529	0.00963486	-0.000334985	44.0697	20.2699	-0.188806	-0.305672	0.180085	0.0275459	-0.0111172	-0.017027	-60.9991	5989.17	0.319435	0.245991	0.0286212	0.0955666	0.0286573	0.0207739	-237.777
6430571L13Rik	31.5135	23.3115	0.191693	0.211413	0.177801	0.13642	0.0195099	0.0202554	133.642	258.293	0.294589	0.298748	0.0551593	0.0516553	0.040127	0.0364031	7.02564	12.5552	0.195525	0.0717941	0.156509	0.605925	0.00699895	0.00346312									18.6575	19.2508	0.221765	0.0930813	0.114098	0.511612	0.010853	0.00494321									40.5345
6430573P05Rik	92.8589	48.3268	0.280204	0.30106	0.0464213	0.0318107	0.0208947	0.0216402	212.441	-742.396	0.122218	0.0970634	0.434947	0.535787	0.0151349	0.0114111	45.315	187.52	0.176066	0.140753	0.202833	0.310019	0.0150508	0.011515	36.7821	51.215	0.261012	0.12884	0.0643132	0.36756	0.0186249	0.00865503	80.9248	77.8464	0.157397	0.091074	0.265116	0.520798	0.0123885	0.0064787	734.131	1423.12	0.142536	0.0612312	0.339194	0.682642	0.0136094	0.00572606	51.3637
6430584L05Rik																	35.074	60.2188	0.00167493	-0.0505875	0.99041	0.7164	0.000129034	-0.0034068
6430590A07Rik																	-316.92	-129.064	-0.0268354	-0.0610835	0.847257	0.660823	-0.00280474	-0.00634057	-169.453	-357.015	-0.319337	-0.395033	0.0223624	0.00411964	-0.0326171	-0.0425869									-95.025	2587.7	-0.134146	-0.222784	0.36867	0.132275	-0.0116664	-0.0195498
6430710C18Rik									108.761	501.792	-0.0925974	-0.122858	0.554802	0.432527	-0.0126237	-0.0163475																	94.8046	119.801	0.106834	0.0504898	0.450956	0.722243	0.0100671	0.0041573	37.1903	46.5212	0.187523	0.0894328	0.206873	0.549967	0.0161851	0.00830167
6430710M23Rik	43.6354	64.2329	0.343094	0.353632	0.0137106	0.0109068	0.0330661	0.0338116	44.5892	296.316	0.0130868	-0.0213387	0.93362	0.891964	0.00145247	-0.00227136	26.3389	254.352	-0.0102643	-0.0605752	0.941278	0.663476	-0.000850966	-0.0043868	40.2159	720.868	0.11075	-0.00859947	0.439113	0.952242	0.00928352	-0.000686324									21.7819	46.0807	-0.234704	-0.319373	0.112288	0.0286541	-0.0161955	-0.0240789	251.474
6530402F18Rik	23.378	11.9832	0.409985	0.477244	0.00280943	0.00039858	0.0268263	0.0275718	27.8731	19.5963	0.0667827	0.0382961	0.670476	0.807375	0.00697053	0.00324669	6.83017	9.03155	-0.127989	-0.185512	0.356365	0.179264	-0.00404822	-0.00758405	7.67774	7.01935	0.402841	0.122914	0.00338059	0.390183	0.0146086	0.00463875	23.607	17.7902	0.4869	0.312546	0.000251893	0.0240798	0.0251089	0.0191991	495.594	69.2096	0.359501	0.311747	0.0130706	0.032912	0.0417081	0.0338247	57.8399
6530403H02Rik									93.1082	90.2384	0.00287581	-0.0261866	0.985398	0.867617	0.000374593	-0.00334924	36.0143	42.2464	0.00928182	-0.039191	0.94689	0.778432	0.000782335	-0.0027535																									-316.728
6530409C15Rik									24.5318	34.9471	-0.090432	-0.159956	0.564134	0.305547	-0.00686765	-0.0105915	18.2374	36.818	0.00968897	-0.050502	0.944564	0.716859	0.000616336	-0.0029195	47.413	174.999	0.118722	-0.0290402	0.406672	0.83969	0.008107	-0.00186285	202.303	9044.34	0.118636	0.0708146	0.402219	0.617875	0.0127367	0.00682689	102.459	194.685	0.0854875	0.0189241	0.56777	0.89953	0.0101083	0.00222496	125.848
6530411M01Rik																	33.8328	-183.232	0.120603	0.0941411	0.385019	0.498335	0.0109691	0.00743329
6530413G14Rik
6720427I07Rik	-120.066	103.166	-0.0927816	-0.0846559	0.517266	0.554763	-0.0104553	-0.00970982	454.889	93.3258	0.191618	0.188875	0.218344	0.225131	0.0181302	0.0144063	22.6059	24.6703	0.00627209	-0.067242	0.964098	0.629017	0.000288356	-0.00324748	79.4849	48.2198	-0.0634341	-0.187929	0.658326	0.186631	-0.0047744	-0.0147442	301.918	53.0917	-0.182874	-0.242274	0.19441	0.0835453	-0.0140326	-0.0199424	-109.418	156.461	0.202978	0.123889	0.171197	0.406724	0.018316	0.0104326	79.3593
6720464F23Rik	-391.893	116.27	0.0395496	0.0476985	0.782896	0.739602	0.00438307	0.00512858	15.9003	13.8144	0.250655	0.221377	0.10497	0.153678	0.0130609	0.00933704									39.463	35.6163	0.187318	0.0583194	0.188093	0.684371	0.0134988	0.00352894	54.5081	33.497	0.195844	0.16748	0.164093	0.235323	0.017897	0.0119872	13.1675	9.3925	0.34233	0.208377	0.018505	0.15985	0.0156014	0.00771804	29.8478
6720469O03Rik
6720475M21Rik									406.157	-430.1	-0.0313432	-0.0674973	0.841853	0.667153	-0.00458933	-0.00831316																	-109.574	-112.186	-0.0584589	-0.10307	0.68059	0.467152	-0.00785573	-0.0137655									-80.6526
6720482G16Rik									35.1849	236.594	-0.280049	-0.319875	0.0689305	0.0365242	-0.0246689	-0.0283927	27.2859	821.495	0.0595719	0.0183001	0.668724	0.895505	0.00478637	0.00125054									141.678	-201.157	0.0142864	-0.0365202	0.91993	0.797152	0.00180505	-0.00410476	114.763	-342.852	0.393127	0.336243	0.00626475	0.0208424	0.0518374	0.043954
6720489N17Rik	-131.983	-681.762	-0.0692155	-0.0663924	0.629363	0.643441	-0.00834599	-0.00760047	22.3931	18.0561	0.0694137	0.0192966	0.658274	0.902251	0.00449405	0.000770215	17.0282	24.6119	0.234691	0.201052	0.0875972	0.1449	0.0139994	0.0104635	38.3592	46.6144	0.525866	0.450162	7.40354e-05	0.000918094	0.049212	0.0392421	73.2561	65.36	0.242497	0.189949	0.0832521	0.177414	0.0197104	0.0138006	145.102	132.069	0.142648	0.0807213	0.338813	0.589627	0.0162507	0.00836736	98.2817
6820402A03Rik	78.7824	53.0942	-0.248754	-0.250741	0.0783731	0.0759427	-0.0319768	-0.0312313	21.7116	30.7137	-0.0696955	-0.117593	0.656972	0.452656	-0.00453867	-0.0082625	29.9715	48.5442	0.0113974	-0.0282906	0.934809	0.839081	0.00109277	-0.00244307	35.0303	43.7467	0.156761	0.0232768	0.271965	0.871203	0.0114898	0.00151999	26.8413	24.3248	0.160229	0.0684124	0.256505	0.629876	0.00956075	0.00365095	90.9762	83.4917	0.359322	0.315148	0.0131192	0.0309527	0.035947	0.0280636	14.7566
6820408C15Rik									220.714	-303.46	-0.114714	-0.136087	0.463873	0.384221	-0.0207432	-0.0244671	20.9359	77.1282	0.246194	0.198534	0.0727255	0.150107	0.014773	0.0112372									23.0869	32.9221	-0.124556	-0.227353	0.378974	0.105036	-0.00710285	-0.0130127									528.506
6820426E19Rik									111.226	3349.88	0.222802	0.217122	0.150978	0.161946	0.0316608	0.0279369
6820431F20Rik	48.2522	18.42	-0.316226	-0.35132	0.0237791	0.0114756	-0.0220858	-0.0213403	23.0136	12.9043	0.0993182	0.0570685	0.526308	0.716237	0.00594101	0.00221718	11.8775	9.70694	-0.0298993	-0.143864	0.830063	0.299338	-0.00133792	-0.00487375	14.9749	10.0418	0.0811735	-0.202328	0.571218	0.154486	0.00336051	-0.00660934	22.7325	11.0713	0.230099	0.120539	0.10079	0.394658	0.0099008	0.00399099	8.93821	5.80918	0.157077	-0.108869	0.291685	0.466343	0.00493198	-0.0029514	15.0028
7420700N18Rik
7420701I03Rik
7530428D23Rik									54.3433	-1885.42	0.307502	0.316769	0.0448671	0.0384884	0.040482	0.0367582
7630403G23Rik
8030423F21Rik
8030423J24Rik
8030443G20Rik
8030445P17Rik																	26.7313	39.9745	-0.0278905	-0.0709152	0.841327	0.610355	-0.00263954	-0.00617537
8030451A03Rik									31.8093	22.1558	0.101134	0.0764051	0.518737	0.626279	0.00804097	0.00431714									-169.4	-179.621	0.128025	0.077356	0.370622	0.58951	0.0223712	0.0124013																	-120.555
8030453O22Rik																	14.4117	29.1521	-0.193088	-0.252341	0.161841	0.0656446	-0.00937549	-0.0129113	129.107	3695.03	0.200178	0.11599	0.159006	0.417628	0.0209318	0.010962
8030455M16Rik
8030487O14Rik																																																	80.4949
8430406P12Rik	109.316	404.738	-0.135426	-0.136324	0.343368	0.340145	-0.0181776	-0.0174321	27.0765	82.7937	0.120096	0.0950229	0.443023	0.544435	0.0102329	0.00650908	27.9932	165.365	-0.0816345	-0.128063	0.557316	0.356082	-0.00825566	-0.0117915	37.8448	286.551	-0.194174	-0.321354	0.172146	0.0214826	-0.0180926	-0.0280625	46.1828	237.124	0.062515	-0.0024419	0.659738	0.986292	0.00571463	-0.000195174	31.1135	68.9601	0.288535	0.222778	0.0491962	0.132285	0.0263299	0.0184465	43.0703
8430419K02Rik									88.7485	183.69	0.0382068	0.0096608	0.807816	0.950973	0.00499445	0.00127062	71.5435	1109.81	0.204386	0.194127	0.138213	0.159553	0.0227416	0.0192058	-1808.98	-196.666	0.163352	0.101506	0.252061	0.478471	0.0244688	0.0144989
8430422M14Rik	29.7374	57.1555	-0.0449397	-0.0363297	0.754178	0.800193	-0.00384308	-0.00309757									16.9839	137.205	0.0955652	0.0451252	0.49183	0.745932	0.00651024	0.0029744	26.4806	236.188	-0.188441	-0.315352	0.185412	0.0241907	-0.0146723	-0.0246422									51.349	-1124.38	0.24484	0.17349	0.0971772	0.243521	0.0267616	0.0188782	18.2052
8430426J06Rik									120.648	-329.297	-0.236802	-0.299326	0.12629	0.0511836	-0.0321137	-0.0358376	184.257	-82.6373	0.0596424	0.0366118	0.668355	0.792679	0.00801429	0.00447846
8430429K09Rik	139.934	66.1532	0.0511687	0.0571102	0.721397	0.690584	0.00410751	0.00485302	49.9188	65.9362	0.186576	0.184628	0.23093	0.235926	0.0162196	0.0124958	10.9237	21.1912	-0.195152	-0.230634	0.157319	0.0933754	-0.00811725	-0.0116531	34.9619	49.4571	0.079266	-0.0720939	0.580325	0.615144	0.00530019	-0.00466965	102.768	104.522	0.101936	0.0197237	0.472092	0.88962	0.00727442	0.00136462	38.4023	36.1788	0.208977	0.103986	0.158624	0.486687	0.0145811	0.0066977	25.322
8430432A02Rik
8430436N08Rik
8430437L04Rik
9030025P20Rik	165.403	31.1026	0.0635902	0.0806509	0.657538	0.573706	0.00379141	0.00453692									47.202	107.172	0.00534922	-0.0519398	0.969377	0.709149	0.000318107	-0.00321773	35.516	36.7918	0.0293556	-0.155583	0.837973	0.275629	0.00144495	-0.00852489	-103.446	1406.48	-0.201227	-0.272188	0.152581	0.0509273	-0.0134939	-0.0194037	680.223	81.5772	0.206585	0.0940632	0.163553	0.529416	0.0142944	0.006411	45.6327
9030204H09Rik																	53.472	-92.7383	-0.147494	-0.183358	0.287178	0.184458	-0.0201353	-0.0236712
9030407P20Rik	33.2719	25.6026	0.00801133	0.0200157	0.955505	0.889126	0.000512224	0.00125774	55.9413	113.513	0.0983494	0.0639641	0.530371	0.683642	0.00859237	0.00486854	10.6635	19.6434	0.0433555	-0.03235	0.755582	0.816366	0.00191799	-0.00161784	13.6094	19.2503	0.243806	0.00649956	0.0846932	0.963895	0.0102599	0.000290098	52.0397	61.1665	0.361728	0.28291	0.00841547	0.0421307	0.0283552	0.0224454	37.8364	37.3263	0.37008	0.299557	0.0104538	0.0407957	0.0267635	0.0188801	20.049
9030612E09Rik																	24.719	149.892	0.116487	0.0578103	0.401564	0.677978	0.00710815	0.00357232									32.1093	47.3235	-0.0939013	-0.187186	0.507883	0.18392	-0.00605071	-0.0119605
9030616G12Rik
9030619P08Rik									58.6962	-173.855	0.209626	0.191017	0.177288	0.219819	0.0239741	0.0202503																																	30.6367
9030622O22Rik																																									38.8152	67.5445	-0.428662	-0.538354	0.00264513	9.48946e-05	-0.0338324	-0.0417158
9030624G23Rik									-20488.8	-91.3834	-0.000656694	-0.0409829	0.996665	0.794144	-7.0577e-05	-0.00379441	51.9603	-2071.05	0.150041	0.119761	0.278845	0.388371	0.0131194	0.00958353	60.9105	137.434	0.59135	0.533051	4.89237e-06	5.64586e-05	0.053182	0.0432122
9130002K18Rik									35.4886	40.3903	0.307431	0.283115	0.0449184	0.0658203	0.022898	0.0191742	38.9745	61.3401	-0.00666955	-0.0536607	0.961824	0.69996	-0.000620773	-0.00415661	91.6881	123.256	0.333643	0.245414	0.0167286	0.0825964	0.0287354	0.0187656									160.988	100.009	0.203473	0.134313	0.170133	0.368067	0.0195814	0.011698	120.547
9130008F23Rik									61.0556	205.251	0.200628	0.161711	0.19705	0.3002	0.0187002	0.0149763									33.4108	54.1254	0.216017	0.088285	0.127894	0.537858	0.0160415	0.00607163	134.821	256.76	0.150522	0.102249	0.286819	0.470727	0.0151016	0.00919182	12.3872	14.2613	-0.372056	-0.51047	0.0100187	0.000246486	-0.0188443	-0.0267277	34.3521
9130015A21Rik									68.2025	-930.671	0.000810444	-0.0263493	0.995885	0.866802	0.000101752	-0.00362208
9130015G15Rik
9130017K11Rik									-818.989	1262.37	-0.0514117	-0.0872167	0.743356	0.578124	-0.00662507	-0.0103489	226.886	-3351.03	-0.00458155	-0.0498699	0.97377	0.720257	-0.000432989	-0.00396882									-331.557	147.919	0.0711516	0.0155195	0.616199	0.913045	0.00734619	0.00143639	22.1844	13.3022	0.166296	0.0250893	0.263921	0.867057	0.00902879	0.00114541	90.3777
9130019O22Rik	55.3516	28.2336	-0.127073	-0.111444	0.374221	0.436235	-0.00928077	-0.00853526	38.8937	26.3056	-0.0290266	-0.108356	0.853409	0.489162	-0.00251776	-0.00624159	13.385	20.3958	-0.0825314	-0.143607	0.552979	0.300211	-0.00344848	-0.00698432	18.8785	19.2608	-0.116021	-0.297176	0.417505	0.0341962	-0.00600007	-0.0159699	27.2858	22.148	-0.107734	-0.205275	0.44713	0.144324	-0.00545214	-0.0113619	8.55049	8.03057	0.235219	0.0442943	0.111479	0.767509	0.00986947	0.00198608	20.6778
9130019P16Rik									89.3711	45.9936	0.0679586	0.0360309	0.665012	0.818571	0.00648665	0.00276281	56.4865	52.6967	0.0784964	0.0392417	0.572616	0.778152	0.00629113	0.0027553									-118.956	391.998	0.15717	0.127123	0.265815	0.369151	0.0190971	0.0131873	-98.8891	374.967	-0.00241179	-0.0743487	0.987163	0.61942	-0.000252891	-0.00813628	-84.0789
9130023H24Rik	15.5116	11.3974	0.105585	0.119071	0.460881	0.405284	0.00552455	0.00627006	29.6825	25.3736	-0.111228	-0.190285	0.477652	0.221624	-0.00998363	-0.0137075	14.4411	20.6909	-0.0265367	-0.0929088	0.848937	0.504	-0.00130353	-0.00483937	10.1395	9.72159	0.0540764	-0.197287	0.706259	0.165239	0.00225463	-0.00771522	16.9397	15.4437	0.0809043	-0.0352995	0.568567	0.803796	0.00403323	-0.00187658	12.7128	10.0301	0.276899	0.131889	0.0595334	0.376855	0.0137391	0.00585571	8.8895
9130024F11Rik									35.9935	25.1022	-0.00270153	-0.047034	0.986283	0.764559	-0.000263686	-0.00398752	10.7144	11.7766	-0.361649	-0.420896	0.00720984	0.00152858	-0.0129978	-0.0165336																									119.152
9130204K15Rik																																																	212.685
9130214F15Rik	8.5169	8.8072	-0.267554	-0.251529	0.0576812	0.074995	-0.0161633	-0.0154178																																	105.42	709.45	0.274058	0.198833	0.0623044	0.180296	0.0313477	0.0234643
9130221F21Rik									433.494	-456.135	-0.124158	-0.148211	0.427636	0.342876	-0.0201369	-0.0238608
9130221H12Rik									88.6788	-933.927	0.0730014	0.0498204	0.641775	0.751043	0.00973521	0.00601138	85.8833	-101.219	-0.0746383	-0.102379	0.591687	0.461329	-0.00798491	-0.0115207	63.124	-3444.66	-0.0158791	-0.113438	0.911938	0.428018	-0.00146642	-0.0114363									97.6771	1312.46	0.218428	0.151787	0.140208	0.308443	0.0231096	0.0152262	111.52
9130227L01Rik									79.9254	227.586	-0.112332	-0.158954	0.473265	0.308626	-0.0123445	-0.0160683	211.111	-114.654	0.100784	0.0830451	0.468372	0.550502	0.0132498	0.00971395
9130230L23Rik									481.188	84.5739	0.0100892	-0.0193775	0.948802	0.901843	0.00130984	-0.002414																	-82.3584	846.255	-0.0123278	-0.0630032	0.930879	0.657245	-0.00177474	-0.00768454	10.273	9.10295	-0.269686	-0.344476	0.0667705	0.0177357	-0.0124509	-0.0203342	-139.493
9130230N09Rik									33.7387	358.935	-0.265828	-0.346363	0.0848999	0.0228902	-0.0308986	-0.0346224																									29.0598	149.957	-0.232728	-0.306243	0.115432	0.0362997	-0.0222	-0.0300834	22.6333
9130401M01Rik	15.0295	11.6411	0.0851818	0.105747	0.552298	0.460186	0.00373726	0.00448277	51.4972	63.9234	0.117438	0.0999155	0.453254	0.523811	0.0137398	0.010016	7.6541	14.3414	-0.116723	-0.159327	0.400602	0.24982	-0.00434138	-0.00787721	7.05951	11.8119	0.04793	-0.206006	0.738384	0.146971	0.00139293	-0.00857691	21.178	25.0041	-0.390382	-0.426247	0.00422125	0.00162835	-0.0212178	-0.0271276	30.3772	25.4211	0.298895	0.217013	0.0412648	0.142857	0.0197435	0.0118601	17.0371
9130409I23Rik									134.549	-928.579	-0.00974831	-0.0351171	0.95053	0.823099	-0.0015016	-0.00522544
9230009I02Rik
9230019H11Rik
9230020A06Rik
9230102K24Rik
9230104M06Rik
9230106D20Rik
9230109A22Rik
9230112D13Rik
9230112E08Rik	396.854	61.0434	-0.185218	-0.188126	0.193183	0.186161	-0.0162936	-0.0155481	61.0322	62.0666	0.0749478	0.0436322	0.632895	0.781153	0.00714685	0.00342301	14.2618	24.1178	-0.28933	-0.318045	0.033838	0.019095	-0.0130436	-0.0165795	46.795	53.1131	0.152837	0.0186548	0.284295	0.896621	0.011344	0.00137411	50.7413	41.8749	0.108473	0.0188552	0.443998	0.894452	0.00725491	0.0013451	80.3933	55.1085	0.00981392	-0.103638	0.947799	0.488154	0.000677026	-0.00720636	182.932
9230112J17Rik									-488.676	-115.925	0.0098129	-0.018121	0.950202	0.908179	0.00134097	-0.00238286																	33.5825	42.3016	-0.0137541	-0.106315	0.922904	0.453169	-0.000765291	-0.00667509
9230114K14Rik	33.1793	23.1408	-0.1137	-0.102947	0.426945	0.472218	-0.00710203	-0.00635652	42.6557	52.9793	-0.0399413	-0.0931857	0.799266	0.552279	-0.00363006	-0.00735389	24.2738	42.1873	0.135253	0.0951377	0.329492	0.493778	0.00842899	0.00489315	16.474	20.0198	0.268023	0.0532715	0.0572272	0.710439	0.0123978	0.00242797	25.6283	23.4426	-0.0119385	-0.125249	0.933056	0.376308	-0.000673223	-0.00658303	-549.609	-634.554	0.209813	0.147078	0.156926	0.323865	0.0210196	0.0131362	14.3797
9230116L04Rik																																									31.1679	38.4778	-0.237957	-0.332228	0.107255	0.0225163	-0.020515	-0.0283984	-238.791
9230116N13Rik									82.3659	87.0707	-0.070605	-0.131283	0.652777	0.401382	-0.00595777	-0.0096816	593.433	-133.453	0.111037	0.0864549	0.424098	0.534197	0.0116158	0.00807996	161.381	174.985	-0.0825021	-0.211743	0.564913	0.135797	-0.00729876	-0.0172686	-169.431	-493.518	0.1002	0.0583004	0.47971	0.68141	0.012483	0.00657317									-100.548
9330020H09Rik	-745.427	655.866	-0.167745	-0.156334	0.239354	0.273288	-0.0192688	-0.0185233									97.4659	-137.492	-0.186259	-0.219609	0.177488	0.110583	-0.0191003	-0.0226361																	-1674.55	-231.766	0.0821757	0.0129363	0.582917	0.931226	0.00937571	0.00149233	237.713
9330102E08Rik	154.98	40.2786	0.0897	0.0978808	0.531335	0.494403	0.00673999	0.0074855	457.226	485.374	0.0488124	0.0245856	0.755924	0.875646	0.00748951	0.00376568	10.491	16.0191	-0.0336055	-0.0943452	0.80937	0.4974	-0.00140518	-0.00494101	73.3234	69.0481	0.404538	0.294194	0.00323635	0.0361265	0.0361747	0.0262049	239.872	75.6459	0.157369	0.108394	0.265202	0.444335	0.0145139	0.00860411
9330104G04Rik																	53.7097	135.583	0.162662	0.123922	0.239917	0.371976	0.0128536	0.00931774
9330111N05Rik	-117.497	64.886	0.183069	0.216535	0.198492	0.12696	0.0161335	0.016879	129.595	79.9134	0.0940227	0.0659961	0.548699	0.674141	0.0113216	0.0075978	117.075	121.209	0.369299	0.398136	0.00599295	0.00286781	0.0425294	0.0389936	449.661	91.8207	0.267513	0.174731	0.0577213	0.220065	0.0223413	0.0123715	-182.651	194.193	0.120038	0.0872351	0.39664	0.538592	0.0147836	0.0088738
9330118I20Rik									203.894	106.048	0.0234909	-0.00604087	0.881142	0.969332	0.00295682	-0.000767013	21.757	20.8058	0.0827359	0.0186959	0.551992	0.893258	0.00445794	0.000922106
9330121K16Rik																	10.3265	12.9196	-0.301092	-0.364766	0.0269384	0.00669017	-0.0135589	-0.0170947
9330136K24Rik	-205.163	1692.46	-0.0820293	-0.0723558	0.567153	0.613857	-0.00884081	-0.0080953	49.2963	89.3973	0.00623447	-0.0312147	0.96835	0.842493	0.000600088	-0.00312374	53.2466	1126.62	0.0371592	-0.00477715	0.789649	0.972651	0.00318367	-0.00035216	18718	-145.966	0.323358	0.242199	0.0206375	0.0868294	0.0351235	0.0251537	153.745	171.327	0.206759	0.172248	0.141382	0.222065	0.0203048	0.014395
9330151L19Rik	21.3445	15.8599	-0.399822	-0.42906	0.00365121	0.00168016	-0.0251466	-0.0244011	31.4895	34.4546	0.0650829	0.0347708	0.678404	0.824816	0.00669721	0.00297338	3.9375	7.18372	-0.245749	-0.277816	0.0732611	0.0419534	-0.00613706	-0.0096729	9.56568	12.6568	-0.260931	-0.473185	0.0643998	0.000453666	-0.00999801	-0.0199679	13.277	14.8096	0.0920771	-0.0419664	0.516197	0.76769	0.00396065	-0.00194915	15.2722	14.4585	0.166462	0.0265571	0.263439	0.859355	0.00923548	0.00135209	8.83499
9330154J02Rik									107.716	90.1742	0.227531	0.223321	0.142272	0.150005	0.0253332	0.0216094	60.031	103.734	0.311761	0.300747	0.02174	0.0271223	0.0253781	0.0218422
9330154K18Rik
9330158H04Rik									80.1936	36.1454	0.107308	0.0712233	0.493398	0.649932	0.0107672	0.00704341	46.2382	25.0535	0.196899	0.18632	0.153562	0.177346	0.0150595	0.0115237									17.3198	6.4317	0.0809211	-0.108157	0.568487	0.445334	0.00293856	-0.00297124	-123.576	98.5778	0.191219	0.146558	0.197903	0.3256	0.0254064	0.0175231
9330159F19Rik									51.7418	35.9256	0.25294	0.232921	0.101735	0.132808	0.0256852	0.0219614	4.58181	4.90173	-0.327515	-0.422833	0.0156273	0.00144595	-0.0093986	-0.0129344	17.3759	15.4772	-0.532962	-0.647093	5.66502e-05	2.88261e-07	-0.0324926	-0.0424624	434.046	61.885	0.0940603	0.0507115	0.507162	0.721072	0.0109882	0.00507839
9330159M07Rik	21.8803	10.0774	0.0486913	0.0747255	0.734379	0.602265	0.00249962	0.00324513	34.0103	21.2348	0.0167918	-0.0539511	0.914889	0.731142	0.00103941	-0.00268442	67.7427	75.5235	0.130872	0.0858725	0.345543	0.536965	0.00921377	0.00567794	17.1199	13.949	0.205931	-0.0390669	0.147122	0.785483	0.00835349	-0.00161636	48.7586	22.2833	0.115624	0.00379968	0.414358	0.978672	0.00610391	0.000194104	-64.0316	-363.004	0.198075	0.122343	0.181996	0.41265	0.0194279	0.0115445	-387.309
9330160F10Rik									63.399	97.5708	0.273028	0.263547	0.0764886	0.0877104	0.0261464	0.0224226	48.6805	312.852	-0.00166728	-0.0477434	0.990453	0.731729	-0.000129132	-0.00366497	95.3681	292.869	-0.0829652	-0.206382	0.562724	0.146219	-0.00631556	-0.0162854																	-431.883
9330162012Rik	108.919	35.0918	0.381715	0.391642	0.00571128	0.00448262	0.0270878	0.0278333	3053.87	-13764.7	-0.0182864	-0.0442853	0.907345	0.777959	-0.00274197	-0.0064658	13.6788	19.6691	0.223713	0.128604	0.103915	0.354036	0.00935255	0.00581672	31.0265	31.6578	-0.0118966	-0.168305	0.933966	0.237767	-0.000729379	-0.0106992	113.267	53.2752	0.0322218	-0.0638688	0.820607	0.652834	0.0019578	-0.003952	28.3606	18.3805	0.386684	0.343013	0.00725487	0.0182571	0.0282731	0.0203898	89.7243
9330162B11Rik																	98.299	-295.318	0.114401	0.100333	0.410105	0.470377	0.0152227	0.0116869																									39.3995
9330162G02Rik	195.116	11.6876	-0.259084	-0.256831	0.0663807	0.068862	-0.0171028	-0.0163573	22.9909	7.06235	0.178344	0.127737	0.252533	0.414329	0.00897888	0.00525504	10.2962	5.70019	-0.116311	-0.208743	0.40228	0.129825	-0.00574069	-0.00927652	27.9735	5.77796	-0.0850812	-0.4598	0.552769	0.000687577	-0.00321862	-0.0131885	44.5659	5.3471	0.242769	0.19948	0.0828962	0.15625	0.0116826	0.00577283	20.834	3.43917	0.204028	-0.0948707	0.168945	0.525872	0.0059394	-0.00194399	37.4438
9330171B17Rik																	18.003	40.6579	0.0839014	0.024873	0.546385	0.858307	0.00499743	0.00146159
9330175E14Rik	-56.7571	-210.85	0.189895	0.202241	0.181981	0.154666	0.0313472	0.0320927	92.1492	39.9036	0.357494	0.433919	0.0185958	0.00364836	0.0338974	0.0301735									80.5554	38.566	0.31429	0.17615	0.0246985	0.216284	0.0208797	0.0109099	-89.9428	-1414.15	0.259269	0.219812	0.0634469	0.117402	0.0348397	0.0289299									-71.0791
9330175M20Rik									213.38	-883.373	0.112345	0.0922972	0.473212	0.556091	0.0153153	0.0115915
9330178D15Rik
9330179D12Rik									66.5579	-264.108	0.247879	0.231817	0.109006	0.134707	0.0233806	0.0196567	15.7847	68.6314	-0.104572	-0.151932	0.45173	0.272761	-0.00549795	-0.00903379	147.218	-127.228	0.262038	0.187649	0.0632346	0.187301	0.0296682	0.0196984
9330182O14Rik
9330185C12Rik
9330188P03Rik	-82.1099	214.094	0.100517	0.111937	0.48279	0.434196	0.0101977	0.0109432	330.496	174.684	0.17974	0.161296	0.248778	0.301461	0.0207623	0.0170385	30.5896	34.2735	0.207101	0.170284	0.13294	0.218299	0.0125609	0.00902503	-273.768	-993.611	0.284479	0.225606	0.0430486	0.111429	0.0349232	0.0249533	176.257	46.8809	0.0607173	-0.017932	0.668949	0.899593	0.00474594	-0.00116386
9330198I05Rik
9330198N18Rik
9330199G10Rik									153.792	203.573	0.0938674	0.0697229	0.549362	0.656846	0.0117653	0.00804145	76.609	197.448	0.524931	0.563549	4.60074e-05	9.12568e-06	0.0577461	0.0542103
9430014N10Rik
9430015G10Rik	58.3239	27.6309	-0.252234	-0.262854	0.0741564	0.0623874	-0.0202162	-0.0194707	22.4367	18.1833	-0.165697	-0.259293	0.288284	0.0931423	-0.016099	-0.0198229	5.69734	7.15071	-0.0387263	-0.147061	0.780993	0.288614	-0.00116897	-0.00470481	13.5798	11.8822	0.160402	-0.080381	0.260844	0.574993	0.00695222	-0.00301763	28.5425	22.9473	-0.0077419	-0.109126	0.95656	0.441245	-0.00043661	-0.00634641	16.1898	11.8094	0.212828	0.0986002	0.150916	0.509654	0.0129377	0.00505428	18.6976
9430018G01Rik									162.555	180.685	0.210854	0.186131	0.174707	0.232065	0.0262292	0.0225054									-95.3802	-89.844	0.0534494	-0.0255254	0.709514	0.858882	0.00687141	-0.00309844
9430021M05Rik																	8.67922	22.8235	0.0632798	-0.0170496	0.649408	0.902609	0.00271816	-0.00081767
9430025C20Rik									58.3063	154.956	0.191937	0.197828	0.217565	0.203504	0.0174849	0.013761	14.4153	22.5284	-0.00885475	-0.0851507	0.949331	0.540406	-0.000502127	-0.00403796	213.073	-167.575	0.0140207	-0.0951331	0.92221	0.506657	0.00133647	-0.00863337	-450.708	-160.063	0.059616	0.0149117	0.674617	0.916438	0.00761823	0.00170842
9430031K09Rik									97.4611	-128.456	0.169099	0.159318	0.278359	0.307507	0.0251889	0.0214651	48.2276	-85.4529	-0.0802859	-0.122271	0.563867	0.378431	-0.00841776	-0.0119536
9430034N14Rik	771.551	53.0736	-0.148767	-0.136367	0.297467	0.339992	-0.0112217	-0.0104762	52.5758	46.2168	0.333598	0.342522	0.0288055	0.0245521	0.0246696	0.0209458	67.9522	216.252	-0.0947348	-0.146574	0.495618	0.29023	-0.00720882	-0.0107447	96.6602	92.0341	-0.0205315	-0.14138	0.886287	0.322365	-0.00177308	-0.0117429	199.288	82.9561	0.0471233	-0.0180876	0.74009	0.898726	0.00431775	-0.00159205	840.376	120.572	-0.245231	-0.335092	0.0966282	0.0213111	-0.0218997	-0.029783	277.053
9430037G07Rik	55.8803	27.3697	-0.21817	-0.218352	0.124046	0.123725	-0.0171847	-0.0164392	569.867	856.444	0.0292246	-0.00181016	0.852421	0.990808	0.00353695	-0.000186879	114.45	967.428	0.126257	0.100169	0.362963	0.471104	0.0127868	0.00925098	63.2413	55.2859	0.212322	0.0766765	0.134705	0.592793	0.014575	0.00460512	103.864	50.5	0.0549756	-0.0333642	0.698689	0.814356	0.00379206	-0.00211775									5503.22
9430037O13Rik									23.2205	65.4483	0.0558096	0.0102626	0.722244	0.947923	0.00434896	0.000625124
9430038I01Rik	40.2823	15.0642	-0.105947	-0.0964515	0.459334	0.500758	-0.00575414	-0.00500863	28.1647	13.2642	0.177947	0.201974	0.253608	0.193999	0.0117837	0.00805986	33.1427	26.2246	0.0934022	0.0524991	0.501728	0.706158	0.00630046	0.00276462	15.522	11.252	-0.0918419	-0.361149	0.521536	0.0092222	-0.00379181	-0.0137617	24.8667	13.186	0.0881094	-0.0527475	0.534513	0.710355	0.00377601	-0.00213379	8.22777	8.87655	-0.062561	-0.186791	0.676125	0.208684	-0.00249392	-0.0103773	49.0597
9430041J12Rik									483.769	-339.544	-0.150863	-0.18392	0.334212	0.237759	-0.0201094	-0.0238332	14.6874	23.2172	-0.0945773	-0.177968	0.496338	0.197921	-0.00464627	-0.00818211
9430053O09Rik									108.883	246.22	0.152062	0.130903	0.330341	0.402761	0.0222349	0.0185111	30.1231	58.6613	0.0753386	0.0358287	0.588204	0.797018	0.0058129	0.00227706	444.307	-325.061	0.146453	0.0782133	0.305128	0.585379	0.0191393	0.0091695																	151.963
9430060I03Rik																	67.1244	-169.232	-0.245272	-0.268689	0.0738377	0.0494674	-0.0260613	-0.0295972	396.339	-86.5465	0.0186589	-0.0834533	0.896599	0.56042	0.00178615	-0.0081837									59.5399	138.014	0.0707528	-0.0146076	0.636507	0.922367	0.00652944	-0.00135395	-3864.93
9430062P05Rik									642.277	-1104.49	0.286157	0.291239	0.0628467	0.0581174	0.0366913	0.0329675																	58.8597	42.9901	-0.104542	-0.193525	0.460781	0.169244	-0.00776373	-0.0136735
9430064I24Rik	93.6081	50.9154	-0.0905729	-0.0794143	0.527331	0.579615	-0.00702432	-0.0062788	-1251.08	-155.554	-0.1984	-0.253996	0.202175	0.100267	-0.0285445	-0.0322683	144.811	-132.765	-0.190076	-0.220321	0.168614	0.109404	-0.0182796	-0.0218155	24.3547	31.0809	0.145123	-0.0285713	0.30959	0.842245	0.00838662	-0.00158322									696.435	780.628	0.324666	0.264165	0.0259765	0.0727688	0.0367786	0.0288953
9430065F17Rik									2555.6	-160.233	-0.0738302	-0.11289	0.637988	0.471056	-0.00927736	-0.0130012	57.1487	601.378	0.189886	0.158886	0.169048	0.25115	0.0176319	0.014096																									198.211
9430069I07Rik
9430073C21Rik									59.5661	201.21	0.125402	0.0858531	0.422984	0.584104	0.0111868	0.00746295
9430078K24Rik									223.362	-156.755	0.211177	0.1879	0.174031	0.227579	0.0345082	0.0307844									5415.67	-79.9259	0.313511	0.247755	0.0250767	0.0796187	0.0417894	0.0318196
9430083B18Rik
9430085M18Rik																	26.0704	415.029	0.197592	0.161193	0.15209	0.244247	0.0157935	0.0122576	55.8416	7835.44	0.377126	0.300025	0.00637232	0.0324329	0.0422489	0.0322791	48.7997	298.387	0.0591195	-0.00971653	0.677177	0.945495	0.00507553	-0.000834273									47.4815
9430087B13Rik
9430087J23Rik									50.0006	-350.389	0.0326362	-0.0062638	0.835417	0.968201	0.003131	-0.000592836	35.2504	201.4	-0.0298081	-0.0628576	0.830574	0.651596	-0.00366923	-0.00720507	87.578	-96.2624	0.436826	0.351317	0.00135113	0.0114764	0.0417442	0.0317743									30.5512	71.9254	0.415653	0.342261	0.00366591	0.0185301	0.0334113	0.0255279	68.378
9430091E24Rik	11.9229	13.5709	-0.0462032	-0.0322289	0.747492	0.822358	-0.00215286	-0.00140735	24.4684	46.6201	0.19039	0.201939	0.221366	0.194078	0.0157218	0.011998	12.9901	36.8052	-0.167695	-0.247747	0.225485	0.0708816	-0.00921808	-0.0127539	12.8066	26.7806	0.0629414	-0.141759	0.660818	0.321059	0.00303937	-0.00693048	16.1849	26.5965	0.116579	0.0147744	0.410486	0.917205	0.00675833	0.000848531	25.5739	55.0526	0.0185017	-0.0899714	0.901762	0.547557	0.00133555	-0.00654784	13.286
9430099M06Rik									22.461	87.2274	0.0308181	-0.0150472	0.84447	0.923704	0.00263061	-0.00109322
9530002B09Rik
9530003J23Rik
9530003O04Rik									43.4298	7987.64	0.200383	0.174448	0.197609	0.263213	0.0228338	0.01911									31.2896	201.634	-0.00523316	-0.120121	0.970927	0.401125	-0.000469925	-0.0104398	26.5478	70.2507	0.253003	0.191663	0.0703502	0.173462	0.0200353	0.0141255									46.8325
9530013L04Rik
9530014B07Rik
9530018F02Rik	63.0533	42.3805	-0.0763526	-0.0672565	0.594361	0.639118	-0.00655635	-0.00581084	38.7764	48.4627	0.110688	0.080874	0.479803	0.606172	0.00908797	0.00536414	29.5155	82.5434	-0.0294273	-0.0886312	0.832707	0.523917	-0.00191307	-0.0054489	51.972	91.6295	0.369694	0.240133	0.00758492	0.0896378	0.0276505	0.0176806									20.3722	20.6621	0.0205557	-0.118818	0.890918	0.426342	0.0011746	-0.00670879	53.0554
9530020I12Rik
9530026F06Rik
9530026P05Rik	40.2412	15.6849	-0.00265463	0.0111484	0.98525	0.938111	-0.00014358	0.000601933	55.5728	30.1673	0.292959	0.321673	0.0565828	0.0354253	0.0249945	0.0212707	40.2161	33.2013	0.306077	0.323461	0.0243926	0.0170397	0.0253766	0.0218407	18.8589	13.9392	0.00273901	-0.179936	0.984781	0.206414	0.000164433	-0.00980541	19.9754	11.1307	0.277157	0.158762	0.0466814	0.260944	0.0121685	0.00625873	468.096	55.9073	0.308535	0.269656	0.0348556	0.0668018	0.0325873	0.0247039	28.2676
9530034A14Rik
9530034E10Rik									46.4265	-92.4057	-0.0954209	-0.126034	0.542743	0.420634	-0.0107167	-0.0144405									45.2751	-173.924	-0.134307	-0.214299	0.347406	0.131026	-0.0166643	-0.0266342																	37.4922
9530036M11Rik
9530036O11Rik
9530046B11Rik																	36.935	-189.038	0.0397966	0.00084642	0.775097	0.995153	0.00360936	7.35298e-05	110.725	-138.359	-0.0706078	-0.15141	0.622468	0.28887	-0.00880971	-0.0187796																	97.6271
9530050K03Rik
9530051G07Rik									-449.364	-1050.34	-0.0395595	-0.0680529	0.801147	0.664574	-0.00569764	-0.00942147	85.3912	162.445	0.0631063	0.022571	0.650307	0.871304	0.00528132	0.00174548
9530052C20Rik									91.5207	-248.014	-0.0990435	-0.129444	0.527459	0.408069	-0.0124656	-0.0161894																									-1103.6	-93.7729	0.113404	0.0567424	0.447866	0.704809	0.0152754	0.00739206
9530052E02Rik									568.658	-145.455	-0.160896	-0.191048	0.302675	0.219743	-0.0259484	-0.0296723	100.211	-117.595	0.245656	0.235927	0.0733729	0.0858933	0.0286742	0.0251383
9530053A07Rik									-562.887	85.5312	0.073134	0.048904	0.641169	0.75548	0.0107297	0.00700584																	-72.6891	280.519	0.0953188	0.0669148	0.50147	0.637406	0.0148872	0.00897743
9530056E24Rik									64.1756	60.109	4.88994e-06	-0.0674542	0.999975	0.667354	3.92203e-07	-0.00372344	35.8829	62.9698	0.0985594	0.0579645	0.478298	0.677165	0.00734271	0.00380687	48.5596	54.1679	0.20916	0.0700693	0.140747	0.625131	0.0145169	0.00454704	391.043	140.665	0.174805	0.105533	0.215173	0.456518	0.0142311	0.00832131									243.652
9530059O14Rik									130.184	64.5232	-0.0615587	-0.094185	0.694951	0.548006	-0.00737559	-0.0110994	8.00325	7.19222	-0.301377	-0.402301	0.0267867	0.00256414	-0.0144406	-0.0179764	-441.266	152.613	0.265868	0.204831	0.0593348	0.149342	0.0317576	0.0217878									800.728	47.4738	0.175753	0.0997806	0.237331	0.504574	0.0163764	0.00849303
9530062K07Rik	39.1077	99.1776	-0.124466	-0.119093	0.384181	0.405195	-0.011581	-0.0108355									21.4252	-160.521	0.0779959	0.0263809	0.575074	0.849814	0.00532493	0.00178909	44.9551	-590.532	-0.00435005	-0.0944685	0.975831	0.509644	-0.000488232	-0.0104581																	36.6471
9530068E07Rik	3.67385	3.54992	-0.221387	-0.176525	0.11846	0.215291	-0.0062566	-0.00551109	13.0037	11.1554	-0.0306291	-0.0822633	0.845412	0.599979	-0.0030866	-0.00681043	2.61523	5.00157	-0.269104	-0.253232	0.0491032	0.0646656	-0.00605287	-0.0095887	2.70897	3.38657	0.204376	-0.161551	0.150267	0.2574	0.00507735	-0.00489249	2.70677	4.3414	-0.116954	-0.224721	0.40897	0.109231	-0.00267213	-0.00858193	4.895	3.22057	0.254468	0.0676339	0.0843274	0.65148	0.00965233	0.00176894	2.10836
9530077C05Rik									26.7389	16.9854	0.0505801	-0.00877457	0.747371	0.955466	0.00330619	-0.000417639	8.43625	7.83475	0.104066	-0.000202776	0.453937	0.998839	0.00352997	-5.86015e-06	64.5256	39.5502	0.385251	0.296153	0.00524349	0.0348484	0.0285172	0.0185474	697.336	66.0225	-0.0715477	-0.161402	0.614231	0.252995	-0.00662799	-0.0125378	773.491	67.4776	0.283599	0.20711	0.0533875	0.162462	0.024793	0.0169096	39.9152
9530078K11Rik									42.6385	-418.138	-0.018126	-0.0531772	0.908154	0.734858	-0.0021797	-0.00590353
9530080O11Rik																	16.1846	45.1135	-0.141118	-0.207297	0.308754	0.132566	-0.00777844	-0.0113143
9530082P21Rik	24.4891	11.9161	-0.225934	-0.242944	0.110895	0.085834	-0.0124359	-0.0116904	51.1905	36.5862	0.330035	0.323194	0.0306664	0.0345172	0.0262975	0.0225736	28.2922	35.4652	0.21479	0.14282	0.118829	0.302896	0.0109739	0.00743805	7.12715	7.51323	0.0739201	-0.220444	0.606194	0.120078	0.00223359	-0.00773625	18.6096	15.4656	-0.117734	-0.205506	0.405832	0.143864	-0.00578945	-0.0116993	32.2035	18.3047	0.473126	0.405931	0.000783464	0.0046403	0.0312189	0.0233355	19.1602
9530085L11Rik																	47.1519	-1089.37	-0.0170913	-0.0571294	0.902372	0.681567	-0.0014098	-0.00494564																									262.338
9530086O07Rik									400.5	-388.923	-0.181492	-0.235681	0.244117	0.128148	-0.0263712	-0.0300951	238.958	-113.425	0.137233	0.1154	0.322393	0.406001	0.0156164	0.0120806	278.816	-824.92	0.236341	0.159919	0.0949761	0.2623	0.0287973	0.0188274																	-207.959
9530097N15Rik																																									47.8498	457.681	-0.194097	-0.270172	0.191109	0.0662613	-0.0180698	-0.0259531
9630001P10Rik									185.157	117.143	0.113207	0.0775763	0.469803	0.620983	0.011774	0.00805013	38.4539	41.709	-0.144261	-0.228881	0.297992	0.0959624	-0.0097547	-0.0132905
9630002D21Rik									98.1514	129.599	0.109669	0.0799897	0.483882	0.610129	0.013045	0.00932118
9630009A06Rik																	41.0397	-286.054	0.0156956	-0.0125621	0.91031	0.928164	0.00201427	-0.00152157
9630010A21Rik	33.6412	24.7036	-0.00310834	0.00701263	0.982729	0.961047	-0.000231906	0.000513607	20.0729	21.2207	0.275759	0.261505	0.0734745	0.0902861	0.0180799	0.0143561	12.7627	14.3717	0.0723221	0.0294173	0.603271	0.832763	0.00544201	0.00190618	12.1619	11.3793	0.20834	-0.00532709	0.142346	0.970405	0.00977054	-0.000199301	16.4662	13.7359	0.269994	0.181021	0.0528994	0.199048	0.0134289	0.0075191	23.0236	20.314	0.30322	0.207991	0.038279	0.160643	0.0199809	0.0120975	13.4943
9630013A20Rik									126.775	302.026	0.111218	0.0800094	0.477691	0.610041	0.015602	0.0118782	57.5733	131.441	-0.481398	-0.518482	0.000228538	5.91545e-05	-0.064165	-0.0677008									-298.22	-307.769	0.0946476	0.0634522	0.504502	0.654956	0.0148775	0.00896767
9630013D21Rik	9.63432	8.06146	0.0792617	0.0940104	0.580346	0.511708	0.00328067	0.00402618	31.5809	41.1176	0.16907	0.105863	0.278443	0.499272	0.0104259	0.00670209	146.156	-241.807	0.105589	0.0850015	0.447321	0.541118	0.0113542	0.00781835	9.76977	11.3985	-0.0376653	-0.216484	0.793006	0.127051	-0.00188149	-0.0118513	46.2237	34.086	0.143981	0.0564124	0.308515	0.691203	0.00904285	0.00313305									18.1701
9630028B13Rik									4421.57	-471.937	0.0243205	-0.00828925	0.876976	0.957927	0.00277196	-0.000951873	175.861	-278.709	0.0600111	0.0321499	0.666425	0.817483	0.0066118	0.00307597																	117.8	93.006	-0.357269	-0.379029	0.0136888	0.00860509	-0.0458069	-0.0536903
9630028H03Rik									329.445	533.781	-0.0486631	-0.0751014	0.756648	0.632196	-0.00656983	-0.0102937	100.335	263.708	0.0593472	0.0366078	0.669902	0.792701	0.00754337	0.00400754																									-119.001
9630041A04Rik																	133.95	-77.5695	0.202068	0.181038	0.142837	0.190168	0.0220712	0.0185354
9630050E16Rik	271.764	25.9073	-0.308431	-0.319899	0.0276637	0.0221143	-0.02437	-0.0236245	52.7226	22.253	0.081144	0.0294464	0.604967	0.851313	0.0052586	0.00153477	50.2726	33.9712	-0.013478	-0.064165	0.922941	0.644829	-0.00116584	-0.00470167	35.5913	18.9628	0.0627798	-0.109166	0.661637	0.445728	0.00391997	-0.00604988	58.7419	16.5713	0.104465	-0.00877635	0.461114	0.950762	0.00551703	-0.000392777	-108.847	204.381	0.145613	0.0941059	0.328763	0.529229	0.0200295	0.0121461	46.2034
9830004L10Rik									315.509	-309.788	-0.0375583	-0.0657227	0.811018	0.675416	-0.0056699	-0.00939373
9830107B12Rik
9830132P13Rik									58.2859	47.5571	-0.150203	-0.221695	0.336354	0.153073	-0.0133128	-0.0170366
9830144P21Rik	-86.5626	272.303	0.075805	0.0827462	0.597016	0.563759	0.00901944	0.00976495	25.0093	18.7744	0.0194611	-0.0358548	0.901421	0.819444	0.00145822	-0.00226561	13.4711	12.4497	-0.0996901	-0.188702	0.47324	0.17177	-0.00572151	-0.00925734	39.5885	24.7559	0.242062	0.0978291	0.087013	0.494632	0.0147933	0.00482349	29.9938	16.9159	0.126089	0.0249545	0.373089	0.860606	0.00715398	0.00124418	63.0458	36.2318	0.371428	0.300724	0.0101552	0.0399802	0.037354	0.0294707	32.7889
9930012K11Rik									41.266	50.6592	0.0128883	-0.0314765	0.934625	0.841189	0.001233	-0.00249083	25.924	79.1845	0.143161	0.0785121	0.301729	0.572539	0.00825694	0.0047211	52.3009	87.9151	0.486357	0.375321	0.000296274	0.00665012	0.0378254	0.0278555									91.3177	98.821	-0.0373774	-0.120925	0.803026	0.418127	-0.00353509	-0.0114185	69.2491
9930014A18Rik									578.825	76.4416	0.160175	0.118681	0.304877	0.448452	0.014342	0.0106181	155.456	80.8962	0.0852682	0.0401914	0.539845	0.772925	0.0061384	0.00260257	83.9072	30.341	0.150441	-0.00411834	0.292001	0.977118	0.00973925	-0.000230595	-226.495	65.0968	0.117705	0.0605523	0.405948	0.669797	0.0110002	0.00509039	406.064	46.016	0.219563	0.151845	0.138106	0.308255	0.0221429	0.0142595	68.0143
9930017N22Rik									24.4906	19.6454	0.0831408	0.0409764	0.596081	0.794176	0.00602259	0.00229876	27.0722	30.6372	-0.107288	-0.171177	0.440004	0.215859	-0.00959686	-0.0131327	29.3729	25.3456	0.18509	0.0455089	0.193496	0.751163	0.0126413	0.00267144	45.7346	25.9968	0.244097	0.215126	0.0811756	0.125626	0.0183691	0.0124593	32.4126	21.6136	0.43561	0.381947	0.00221035	0.0080669	0.0311264	0.023243	28.5559
9930021J03Rik	23.7048	9.51429	-0.14887	-0.144328	0.297127	0.312276	-0.0073328	-0.00658729	17.8612	7.83443	0.0379969	-0.0394818	0.808852	0.801529	0.002288	-0.00143583	5.40466	6.48841	-0.209315	-0.25239	0.128752	0.0655901	-0.00571672	-0.00925255	11.7951	6.63453	0.104895	-0.203953	0.463829	0.151133	0.00390827	-0.00606157	12.9246	6.21451	0.210617	0.0515901	0.133944	0.716441	0.00741097	0.00150116	6.68189	3.9814	0.236361	-0.0530069	0.109702	0.723444	0.0065703	-0.00131309	14.5698
9930022D16Rik
9930024M15Rik	114.542	57.1147	-0.073664	-0.0704222	0.607445	0.623386	-0.00654662	-0.00580111	17.7666	13.8607	-0.131309	-0.316614	0.401289	0.0385887	-0.0080065	-0.0117303	13.8721	18.1273	0.108184	0.0519903	0.43617	0.708879	0.00578506	0.00224923	19.9615	20.0214	0.180473	0.0123214	0.205041	0.931614	0.0105318	0.000561958	25.1449	22.7782	0.160027	0.0820681	0.257113	0.562999	0.0107701	0.00486031	11.8837	13.3724	0.117714	-0.0536966	0.430684	0.71999	0.0052488	-0.00263459	41.7901
9930038B18Rik																									-425.177	-593.415	0.0055418	-0.0809139	0.969213	0.572453	0.0006666	-0.00930324
9930104L06Rik	19.1646	8.48062	-0.14527	-0.15345	0.309096	0.282346	-0.00640521	-0.0056597	21.6702	13.147	0.0983147	0.0562024	0.530516	0.720368	0.00638814	0.0026643	5.84448	5.95553	0.22131	0.096818	0.10778	0.486143	0.00629874	0.0027629	9.35845	6.56628	0.332116	0.0643448	0.0172656	0.65373	0.01187	0.00190017	13.7677	10.522	0.0454828	-0.094494	0.748836	0.505197	0.00178642	-0.00412339	17.6154	9.36733	0.290808	0.164678	0.0473577	0.268663	0.014284	0.00640064	12.4024
9930111H07Rik
9930111J21Rik1									75.6219	58.2486	0.0580877	0.0286222	0.711386	0.85543	0.0070007	0.00327686	-103.899	-77.8261	0.36778	0.340821	0.00621913	0.0116718	0.039118	0.0355822	39.75	25.4777	0.510606	0.447275	0.000129071	0.000999525	0.0344276	0.0244578	88.4698	43.0529	-0.0761382	-0.140911	0.591631	0.319054	-0.00511562	-0.0110254									-5612.49
9930111J21Rik2	104.062	30.4149	-0.358525	-0.374076	0.00978272	0.00684787	-0.0412558	-0.0405102	28.2909	20.0142	0.0926781	0.057716	0.554455	0.713154	0.00874021	0.00501637	113.109	65.0926	0.438765	0.456143	0.000903914	0.00052728	0.0332451	0.0297093	17.0304	10.4304	0.611486	0.528333	1.87274e-06	6.75034e-05	0.03367	0.0237002	11.9151	10.2062	0.0377648	-0.115868	0.790393	0.413367	0.00107563	-0.00483418	64.3319	22.492	0.444408	0.398319	0.0017512	0.00555456	0.0347778	0.0268944	31.3031
9930120I10Rik									31.0234	115.337	-0.0948655	-0.131837	0.545105	0.399382	-0.0107323	-0.0144561	44.5552	-76.1815	0.13686	0.106107	0.323724	0.445082	0.0134731	0.00993726	39.5152	-657.849	0.0623113	-0.0441447	0.664011	0.758394	0.00586156	-0.00410829									18.2893	41.3287	0.0215166	-0.0914238	0.885852	0.541084	0.00150275	-0.00638063	62.791
A030001D20Rik	40.0981	46.3107	0.0175482	0.026353	0.902724	0.854355	0.00144344	0.00218895	83.2112	1847.35	0.41708	0.438454	0.00539529	0.00327241	0.0604856	0.0567618	6.84959	14.764	-0.202392	-0.239358	0.142183	0.0812992	-0.00775232	-0.0112882	12.1854	21.0944	0.0254228	-0.210989	0.859444	0.137227	0.00109213	-0.00887771	15.2694	24.0548	0.0449012	-0.0578992	0.751945	0.683487	0.00240592	-0.00350388									56.5949
A030003K21Rik
A030005K14Rik
A030005L19Rik
A030012G06Rik
A130010J15Rik	18.1125	10.3839	-0.0924397	-0.0738631	0.518818	0.606472	-0.00366923	-0.00292372	20.7294	11.6718	0.246063	0.314919	0.111709	0.0396987	0.0157535	0.0120296	10.3385	12.8987	0.211438	0.114185	0.124833	0.410993	0.00854285	0.00500702	11.1404	10.2291	-0.0465807	-0.316761	0.745497	0.0235305	-0.00173536	-0.0117052	9.31771	9.0354	-0.0465527	-0.193197	0.743128	0.169981	-0.00145203	-0.00736183	10.2372	7.03764	0.346184	0.195869	0.0171429	0.187011	0.014963	0.00707957	11.8013
A130012E19Rik	40.4052	22.4666	-0.136537	-0.144374	0.339386	0.31212	-0.009779	-0.00903348	17.7609	12.6225	0.190602	0.213017	0.220842	0.170224	0.0126519	0.00892809	15.9898	19.2264	-0.0443674	-0.124369	0.75006	0.370243	-0.00262144	-0.00615727	14.6031	15.6345	-0.0644365	-0.281192	0.653267	0.0456233	-0.00309102	-0.0130609	25.8642	16.6482	-0.124104	-0.322354	0.380722	0.0197737	-0.00666559	-0.0125754	10.0709	8.52777	-0.0141234	-0.252617	0.924932	0.0866889	-0.000514892	-0.00839828	16.6239
A130014A01Rik	49.3094	38.5869	-0.264411	-0.242745	0.0607954	0.0860984	-0.0184755	-0.01773	31.5961	37.5276	0.0131518	-0.0244214	0.933291	0.87647	0.0014326	-0.00229123	12.1931	21.4233	-0.00829141	-0.0814201	0.95255	0.558355	-0.000395686	-0.00393152	16.2707	21.4979	-0.0115275	-0.22203	0.936011	0.117368	-0.000569453	-0.0105393	24.0652	29.6957	0.101514	-0.00486698	0.473939	0.972683	0.00561595	-0.000293851	10.361	10.8578	-0.147131	-0.33314	0.323692	0.0221267	-0.00648618	-0.0143696	17.1563
A130023I24Rik
A130030D18Rik
A130048G24Rik									55.2966	77.2159	0.0580197	0.0221942	0.711709	0.88766	0.00560701	0.00188318									102.146	217.237	0.284462	0.196164	0.0430619	0.167707	0.0278338	0.017864																	-528.958
A130050O07Rik									72.1116	100.063	-0.141383	-0.187186	0.365814	0.229382	-0.015216	-0.0189399	40.3306	96.1461	-0.0172504	-0.0723607	0.901468	0.603077	-0.00130939	-0.00484523																									-114.778
A130051J06Rik	29.6732	19.3625	-0.128655	-0.137207	0.368252	0.336997	-0.00847791	-0.0077324	24.1462	24.1384	-0.00181121	-0.0667113	0.990803	0.670808	-0.000137038	-0.00386087	44.1884	127.322	0.0727463	0.0387884	0.601142	0.780651	0.00670987	0.00317403	11.9358	14.68	0.116638	-0.11854	0.415016	0.407394	0.00491298	-0.00505686	54.0912	53.8461	-0.0874201	-0.17619	0.537728	0.211505	-0.00637593	-0.0122857	8.38345	8.67008	0.140369	-0.0286913	0.346665	0.848181	0.00651977	-0.00136362	25.992
A130071D04Rik									14.682	9.19685	0.221783	0.21109	0.152905	0.174213	0.0125464	0.00882253									50.6199	28.0692	0.582641	0.546921	7.26643e-06	3.28705e-05	0.0451177	0.0351478	234.1	49.6254	0.202397	0.188817	0.150161	0.180059	0.0234696	0.0175598	54.918	21.3279	0.0556689	-0.0775966	0.710147	0.604156	0.00355803	-0.00432536	140.789
A130077B15Rik
A1bg																																	125.244	160.085	0.114059	0.0581648	0.420747	0.682112	0.0114173	0.00550745
A1cf									97.0995	100.97	0.0142202	-0.0185745	0.927886	0.905892	0.00165059	-0.00207324																									6.23315	6.97645	-0.128691	-0.262962	0.388635	0.0741298	-0.00523584	-0.0131192	6.27452
A230001M10Rik																	13.7264	25.3098	0.547988	0.473819	1.79402e-05	0.000295714	0.0277491	0.0242132
A230004M16Rik									69.9736	42.8169	-0.0146008	-0.0477974	0.925961	0.760849	-0.0016709	-0.00539473	51.6006	37.757	0.0979746	0.072913	0.480925	0.600306	0.00970946	0.00617363									-841.125	72.5035	0.237815	0.231747	0.0895699	0.0983075	0.0316293	0.0257195									-238.722
A230005M16Rik
A230006K03Rik																	10.8336	20.0792	-0.124307	-0.188012	0.370481	0.173372	-0.00721519	-0.010751
A230009B12Rik									551.072	-1464.23	-0.00902703	-0.0306257	0.954186	0.845429	-0.00152527	-0.0052491	40.5665	85.4456	0.30779	0.30807	0.0235657	0.0234332	0.0235796	0.0200437
A230020J21Rik																																									47.3147	78.0695	0.0435496	-0.0235313	0.771312	0.875245	0.00506321	-0.00282017
A230028O05Rik
A230056P14Rik	58.2382	40.2137	-0.434291	-0.460934	0.00145157	0.000664226	-0.0374516	-0.0367061	30.8761	40.4634	-0.0912188	-0.174108	0.560735	0.26416	-0.00681611	-0.0105399	6.30796	11.1895	-0.27481	-0.305068	0.0443164	0.0248906	-0.00941062	-0.0129465	37.9936	60.7902	0.207144	0.0761134	0.144701	0.59552	0.0151511	0.00518128	35.6291	33.286	0.11202	0.0050683	0.429152	0.971554	0.00612798	0.000218177	115.801	167.334	0.133698	0.04966	0.370287	0.740275	0.012399	0.00451566	21.9531
A230057D06Rik									76.9084	32.5302	0.0539846	0.0163433	0.730981	0.917154	0.00540564	0.00168181	19.2107	12.288	-0.0542424	-0.125137	0.696863	0.367269	-0.00356155	-0.00709738	-120.452	99.8425	0.213486	0.142019	0.13253	0.320162	0.0237297	0.0137598	-348.217	40.4774	0.248736	0.242935	0.075384	0.0826792	0.0278479	0.0219381	-72.0617	418.337	0.0906895	0.0457784	0.544352	0.759947	0.0150938	0.00721042	-171.603
A230059L01Rik									126.582	103.031	0.0713003	0.0415217	0.649578	0.791497	0.00848986	0.00476603	59.3422	73.6341	-0.0281771	-0.0701764	0.839719	0.614089	-0.00297588	-0.00651172									-161.401	5801.74	0.0642086	0.0232407	0.651106	0.870094	0.00868767	0.00277787
A230060F14Rik																	48.4317	-586.435	-0.0491515	-0.0976868	0.724126	0.482221	-0.00450389	-0.00803972																	-550.03	-149.92	0.431317	0.390062	0.00247078	0.00672012	0.0623874	0.054504	22.8058
A230065N10Rik	17.7399	25.1601	-0.0410764	-0.0284548	0.77473	0.84288	-0.00235834	-0.00161283									20.1963	159.573	0.0960931	0.0525544	0.489429	0.705862	0.00683366	0.00329782									40.5367	316.303	0.0745238	0.000490982	0.599537	0.997244	0.00594957	3.97632e-05									36.9172
A230072C01Rik	9.61414	11.8793	-0.463323	-0.379182	0.000617321	0.00606837	-0.0190959	-0.0183504	32.5338	82.7239	-0.149256	-0.199434	0.339445	0.199784	-0.0127594	-0.0164833	6.85144	12.5356	-0.405805	-0.446468	0.00233122	0.000714328	-0.0164903	-0.0200262	11.2953	20.8862	-0.329677	-0.460495	0.018154	0.000673169	-0.0153398	-0.0253097	20.3916	30.1682	-0.155918	-0.256252	0.269689	0.0666996	-0.00925363	-0.0151634	38.6105	68.9484	0.107562	0.00388487	0.471746	0.979324	0.00814	0.000256616	14.2822
A230072E10Rik									209.275	71.2046	-0.152748	-0.207017	0.328136	0.182865	-0.015106	-0.0188299	36.4577	30.2631	-0.0367399	-0.113728	0.791969	0.412881	-0.0019834	-0.00551923									-159.738	253.918	-0.0375314	-0.0856013	0.791659	0.546254	-0.00573553	-0.0116453									-329.72
A230077H06Rik																	29.4779	27.1997	0.150348	0.118239	0.277853	0.394472	0.0105567	0.00702088
A230081H15Rik																	30.7572	43.3027	-0.102081	-0.149191	0.462637	0.28161	-0.0109331	-0.0144689
A230083G16Rik																	68.5193	-80.5597	0.128623	0.102542	0.353967	0.460611	0.0154442	0.0119083																									102.161
A230083N12Rik
A230085B16Rik
A230087F16Rik																	101.295	-188.471	0.0131435	-0.0283469	0.924848	0.838766	0.0010836	-0.00245223
A230098N10Rik
A230103J11Rik																	10.7411	22.7981	-0.161509	-0.207709	0.243309	0.131781	-0.00701176	-0.0105476																	1810.99	-345.012	0.13548	0.0734123	0.363885	0.623851	0.0173097	0.00942634
A230103L15Rik									39.0773	38.384	0.231891	0.194508	0.13458	0.211348	0.0193167	0.0155929	14.5382	15.2739	0.0175654	-0.0299589	0.899678	0.829729	0.00138774	-0.00214809
A230107N01Rik	1791.23	164.302	-0.316899	-0.312338	0.0234666	0.0256551	-0.037396	-0.0366505									36.3325	109.171	-0.237294	-0.293648	0.0840389	0.0311518	-0.01883	-0.0223658	-173.045	-83.2612	-0.0448309	-0.135918	0.754754	0.341601	-0.00538176	-0.0153516									323.58	456.436	-0.348282	-0.409191	0.0164375	0.00429101	-0.0409755	-0.0488589	58.0678
A230108P19Rik									76.5111	156.988	-0.0203589	-0.0511038	0.896897	0.744842	-0.00247742	-0.00620125
A26c2
A2m									44.7314	31.8237	-0.395902	-0.445444	0.00859028	0.00275936	-0.0531047	-0.0568285	7.62938	6.93795	0.304355	0.221014	0.0252481	0.108265	0.0119083	0.00837246	-299.373	350.328	0.221924	0.182908	0.117547	0.198893	0.0399288	0.0299589	74.3701	23.4201	0.264092	0.246391	0.0585127	0.0782697	0.0222471	0.0163373									356.001
A2ml1									62.0641	36.1682	0.0336897	-0.000717653	0.830181	0.996356	0.00364777	-7.60589e-05	29.0152	17.5878	0.00750976	-0.06273	0.957019	0.652258	0.00049029	-0.00304554									5294.06	50.8607	0.195665	0.180999	0.164486	0.199103	0.0233744	0.0174646	-95.7781	303.013	0.188605	0.135048	0.204219	0.365431	0.0271283	0.0192449	-203.679
A330008L17Rik									268.12	113.133	0.089045	0.0587688	0.57015	0.708151	0.0111558	0.00743196	22.4196	19.715	-0.25824	-0.369838	0.0593785	0.00591448	-0.0145916	-0.0181274
A330009N23Rik																	9.57102	21.9451	-0.244732	-0.260074	0.0744963	0.057531	-0.0109927	-0.0145285	33.7872	82.4322	-0.117	-0.24868	0.41356	0.0784657	-0.00871121	-0.0186811	38.9693	67.9514	-0.135879	-0.222528	0.336811	0.112826	-0.00926747	-0.0151773									121.298
A330015K06Rik									404.574	109.388	-0.0414322	-0.0738665	0.791937	0.637822	-0.00509102	-0.00881485	16.2189	13.5785	0.466283	0.452728	0.000379857	0.000587519	0.0223407	0.0188049
A330023F24Rik	64.369	11.166	-0.0178824	-0.002903	0.90088	0.98387	-0.000866157	-0.000120645	35.5868	14.5641	0.241289	0.244761	0.119057	0.113678	0.0156191	0.0118953	7.6809	5.83262	0.0943836	0.00908018	0.497224	0.948042	0.00386297	0.00032714	25.7269	13.0714	0.334967	0.163441	0.0162745	0.251799	0.0176889	0.00771904	21.4357	9.08721	0.227658	0.127685	0.104558	0.367022	0.0111143	0.00520446	55.3147	15.9187	0.621113	0.585469	3.18677e-06	1.5408e-05	0.0405298	0.0326464	16.1052
A330032B11Rik	389.956	246.06	-0.146098	-0.131143	0.306317	0.358983	-0.0116756	-0.0109301	104.237	-433.776	0.00746727	-0.030632	0.962096	0.845398	0.000831229	-0.0028926	35.5184	752.535	-0.106506	-0.163262	0.443362	0.238165	-0.00793404	-0.0114699	3676.68	-93.4362	0.0315133	-0.0621875	0.826241	0.664639	0.00342655	-0.00654329	450.843	-257.068	-0.269678	-0.360327	0.0531882	0.00869095	-0.0284506	-0.0343604									151.588
A330033J07Rik																	42.1123	170.654	0.203588	0.185222	0.139791	0.179957	0.0141352	0.0105994
A330035P11Rik	-111.441	-12101.4	0.020567	0.0280041	0.886091	0.845338	0.00243003	0.00317554																																	76.8667	67.945	0.0277283	-0.0581656	0.853219	0.697754	0.00232086	-0.00556253	-646.36
A330040F15Rik	55.8846	41.1707	0.0143775	0.0235869	0.920237	0.869502	0.00135887	0.00210439	26.9398	40.263	-0.0165011	-0.0805951	0.916357	0.607419	-0.00107914	-0.00480297	13.7345	26.0086	-0.0222424	-0.100431	0.873162	0.469939	-0.00104254	-0.00457837	35.8844	52.5103	0.13102	0.0234363	0.359439	0.870328	0.0121243	0.0021545	-616.844	-241.99	0.0644503	0.0234048	0.649878	0.869184	0.00864626	0.00273646									10.0582
A330041J22Rik																	35.4046	302.872	-0.0676728	-0.106866	0.626816	0.441816	-0.00570187	-0.0092377
A330043C09Rik
A330044P14Rik									83.8568	88.8767	0.0780899	0.0495722	0.618666	0.752244	0.00889786	0.00517403
A330048O09Rik																	18.4992	-218.652	0.0794887	0.0255162	0.567757	0.854682	0.00526855	0.00173272
A330049N07Rik									111.425	233.16	0.059897	0.0366323	0.702803	0.815596	0.0091344	0.00541057	20.6089	33.0343	0.285424	0.277906	0.0364305	0.041884	0.0173363	0.0138004
A330058E17Rik
A330070K13Rik																	28.5349	-131.674	0.0242195	-0.0158492	0.861993	0.909436	0.00218054	-0.00135529
A330074H02Rik																	13.3265	37.944	-0.0788504	-0.148907	0.570881	0.282535	-0.00482088	-0.00835671
A330074K22Rik																	36.9756	202.856	0.185736	0.127607	0.17873	0.357811	0.013078	0.00954212
A330076C08Rik									167.187	77.1593	-0.0416695	-0.0704003	0.790772	0.653721	-0.00557709	-0.00930092	24.7044	19.0734	-0.110534	-0.199207	0.426212	0.148702	-0.00678546	-0.0103213
A330076H08Rik									57.4325	53.06	-0.00579665	-0.0413827	0.970572	0.79218	-0.000586118	-0.00430995	10.3892	9.98144	-0.0150073	-0.0831554	0.914229	0.549971	-0.000911917	-0.00444775									-851.254	177.402	0.293382	0.281811	0.0347832	0.0429708	0.0419094	0.0359996	-137.311	-518.233	0.233645	0.196039	0.113964	0.186621	0.0400994	0.032216	-452.834
A330087D11Rik																	137.548	-73.2064	-0.0877475	-0.12486	0.528079	0.36834	-0.0118171	-0.015353
A330093E20Rik									96.3206	126.686	0.0259859	-0.00483127	0.868623	0.975471	0.00314491	-0.000578918																	-430.579	1504.85	0.115372	0.0786088	0.41538	0.579623	0.0148074	0.0088976
A330102I10Rik																	7.9889	11.3631	-0.044486	-0.15588	0.749414	0.260347	-0.00184228	-0.00537811									52.3275	87.889	0.193986	0.136073	0.16821	0.336118	0.0169369	0.0110271
A3galt2									-561.894	-313.632	-0.0869797	-0.120885	0.579161	0.440009	-0.0134886	-0.0172125
A430005L14Rik	9.1381	8.94912	0.075919	0.099663	0.596463	0.486537	0.00337913	0.00412464	18.278	21.5168	-0.0043512	-0.0477816	0.977908	0.760925	-0.00045542	-0.00417925	4.41535	11.5909	-0.204539	-0.202893	0.137912	0.141178	-0.00570286	-0.0092387	4.54353	8.54108	-0.0727448	-0.327388	0.611947	0.0190224	-0.001906	-0.0118758	6.82415	11.2196	-0.119496	-0.21865	0.39879	0.119402	-0.00414204	-0.0100518	4.93007	5.71956	0.338841	0.102547	0.0198159	0.492771	0.011212	0.00332857	3.77281
A430010J10Rik									88.7268	74.984	0.102642	0.072571	0.51249	0.643746	0.0116131	0.00788928	79.0897	105.628	0.211071	0.2157	0.125505	0.117237	0.022679	0.0191432									-182.726	3543.07	0.105599	0.0775593	0.456236	0.584711	0.0158955	0.00998566
A430018G15Rik	25.5801	26.1155	0.241143	0.252279	0.0882566	0.0741025	0.0176774	0.0184229									62.8737	-142.03	0.142951	0.102812	0.302447	0.459425	0.0136339	0.010098	17.9985	40.4016	-0.436796	-0.52335	0.0013523	8.12889e-05	-0.0228009	-0.0327708									288.819	-235.038	0.283462	0.214768	0.0535083	0.147142	0.0314808	0.0235974	24.1028
A430027C01Rik	-584.988	-353.82	-0.00437592	0.000817063	0.975688	0.99546	-0.000632689	0.000112823	40.4554	98.7378	0.255388	0.260726	0.0983545	0.0912837	0.0244155	0.0206917	47.2944	1254.02	0.231047	0.217963	0.0927744	0.113348	0.0258326	0.0222968	57.5045	39312.6	0.174043	0.0557411	0.221915	0.697643	0.0142403	0.00427042	196.603	-696.077	0.153711	0.119573	0.276612	0.398486	0.0210757	0.0151659	75.5482	178.273	0.212378	0.156991	0.151803	0.291953	0.0243362	0.0164528	132.829
A430027H14Rik																	21.5978	75.6681	-0.131588	-0.183581	0.342887	0.183915	-0.00979771	-0.0133335
A430028G04Rik									152.823	-422.987	0.022648	-0.00404482	0.885378	0.979463	0.00318049	-0.000543344																									408.671	-346.529	-0.138317	-0.215337	0.353831	0.146047	-0.0155037	-0.023387	-1791.1
A430033K04Rik	23.1855	13.6668	-0.0713879	-0.0600699	0.618619	0.675414	-0.00390872	-0.00316321	24.6345	17.5605	0.0304321	-0.0231034	0.846394	0.883089	0.00240128	-0.00132255	4.67132	6.13237	-0.0623828	-0.169374	0.654061	0.220806	-0.0016374	-0.00517323	11.8773	9.36841	0.101413	-0.170058	0.478879	0.232844	0.00419302	-0.00577682	15.2819	10.1023	-0.076745	-0.251308	0.588672	0.0723172	-0.0034569	-0.0093667	21.3844	13.4972	0.454729	0.395178	0.00132208	0.00597534	0.0266644	0.018781	7.87332
A430034D21Rik
A430035B10Rik	36.7203	15.2284	0.17092	0.206739	0.230451	0.145506	0.0103047	0.0110502	33.8396	22.8178	-0.0433457	-0.115716	0.782555	0.459952	-0.00323835	-0.00696218	17.7913	15.6996	-0.126472	-0.252285	0.362141	0.0657065	-0.00600266	-0.00953849	22.6644	18.3971	-0.136771	-0.352101	0.338551	0.0112807	-0.00614428	-0.0161141	326.414	44.988	0.0499433	-0.0327584	0.72513	0.817669	0.00391231	-0.0019975	32.6698	17.1851	0.238768	0.116882	0.106028	0.43397	0.0137891	0.00590571	25.2885
A430048G15Rik
A430050A11Rik
A430057M04Rik									-252.654	814.485	0.139616	0.106854	0.371895	0.495239	0.013719	0.00999519	897.416	-1026.62	-0.0414176	-0.0825631	0.76619	0.552826	-0.00366273	-0.00719857																	-169.998	260.59	0.119658	0.0605482	0.423057	0.685999	0.0155594	0.007676
A430072C10Rik									189.884	-5096.4	-0.0300021	-0.0600797	0.848539	0.701938	-0.00437817	-0.00810201
A430072P03Rik									110.423	-438.521	0.141047	0.136697	0.366963	0.382075	0.019742	0.0160182
A430073D23Rik									61.0449	-153.215	0.136555	0.120333	0.382573	0.442116	0.0193071	0.0155833
A430078I02Rik									-18560.1	-200.34	-0.0379102	-0.0688065	0.80928	0.661082	-0.00522455	-0.00894838	-1040.51	-89.0688	0.373576	0.384453	0.00539421	0.00410157	0.0545291	0.0509933																									-159.159
A430088P11Rik																																									2273.35	107.189	-0.111762	-0.183153	0.454508	0.217845	-0.0117828	-0.0196661
A430090L17Rik	186.226	48.5304	-0.0906325	-0.0891646	0.527058	0.533799	-0.00858344	-0.00783792	40.4873	38.8005	0.14132	0.109573	0.36603	0.484266	0.0123445	0.00862072	31.3409	36.9714	0.0766918	0.0430899	0.581501	0.757033	0.00657354	0.0030377	32.7164	27.1725	0.185842	0.0476498	0.191661	0.739859	0.0126083	0.00263845	62.2252	31.0857	0.21467	0.172783	0.12645	0.22061	0.0148668	0.00895704	47.0713	32.7022	-0.0794717	-0.193029	0.595418	0.193612	-0.00612509	-0.0140085	25.8234
A430093F15Rik									144.581	264.106	0.155258	0.134509	0.320155	0.389809	0.0195811	0.0158573
A430103D13Rik																	27.9291	-171.686	0.112448	0.0693221	0.418195	0.61842	0.00932484	0.00578901
A430105J06Rik
A430108G06Rik																	23.6421	111.199	-0.0593417	-0.11291	0.66993	0.416271	-0.00430301	-0.00783885
A430110C17Rik									51.8744	37.3749	0.0351986	-0.0206102	0.822694	0.895632	0.00253117	-0.00119266	80.4748	119.262	-0.0303058	-0.0742604	0.827787	0.59357	-0.00313136	-0.0066672	-521.364	1952.92	0.255738	0.183255	0.0700928	0.198027	0.0266844	0.0167146	-138.5	845.059	-0.0209064	-0.0900248	0.883046	0.525632	-0.00214734	-0.00805714	-128.762	-563.616	0.0870327	0.0348252	0.560765	0.816234	0.0127625	0.00487907	911.266
A430110L20Rik									58.9609	107.424	-0.0213719	-0.0665	0.891797	0.671792	-0.00203425	-0.00575808	41.1404	268.61	0.388481	0.375411	0.00369719	0.00515389	0.0281714	0.0246356	50.1248	81.1078	0.0922019	-0.0402736	0.519898	0.779021	0.00716806	-0.00280179																	743.301
A4galt	97.3863	65.9409	0.201924	0.20843	0.155329	0.14217	0.0176453	0.0183908	33.0335	46.305	0.334427	0.321772	0.0283865	0.0353656	0.0312824	0.0275586	26.0755	64.6424	0.355331	0.298077	0.00837167	0.0285835	0.0269796	0.0234438	7.33417	8.1173	0.401727	0.176723	0.00347825	0.21477	0.0170211	0.00705123	13.7309	19.0445	-0.183291	-0.239301	0.193378	0.0875254	-0.00897719	-0.014887	22.2357	20.4251	0.389617	0.350509	0.0067885	0.0157162	0.0322579	0.0243745	7.2128
A4gnt									306.658	-1599.56	-0.0851428	-0.10516	0.58723	0.50214	-0.0140616	-0.0177855																																	13.3006
A530001N23Rik
A530006G24Rik
A530010F05Rik
A530010L16Rik									50.5635	107.208	0.0712616	0.0284374	0.649755	0.856353	0.00575828	0.00203445									218.092	-530.108	0.306754	0.235382	0.0285651	0.0963632	0.0388386	0.0288687
A530013C23Rik	-98.7694	76.7995	-0.0720279	-0.0632835	0.615468	0.659087	-0.00669062	-0.00594511																	107.234	48.3693	0.0819926	-0.0778281	0.567327	0.587233	0.00490188	-0.00506797	-82.3273	342.78	0.0548198	-0.0085351	0.699503	0.952114	0.00508427	-0.000825538
A530016L24Rik	7.67745	6.14719	0.293274	0.341919	0.0367399	0.0140583	0.0203324	0.0210779																	4.63496	5.70251	-0.403449	-0.517704	0.00332826	9.99971e-05	-0.0188985	-0.0288684	4.46539	6.97369	-0.152892	-0.21018	0.279208	0.134771	-0.0048303	-0.0107401
A530017D24Rik	-228.748	515.67	-0.161528	-0.158965	0.257467	0.265196	-0.0177308	-0.0169853	62.1725	112.09	0.0303657	-0.0151495	0.846725	0.923187	0.00262074	-0.00110309	22.402	49.4754	-0.00364638	-0.0591717	0.979123	0.670822	-0.000223117	-0.00375895	117.55	859.775	0.199084	0.0885194	0.161345	0.536775	0.0167174	0.00674754	-2642.5	-876.753	0.217449	0.166186	0.121496	0.239012	0.0188653	0.0129555	120.001	132.536	0.385411	0.280155	0.00746577	0.0564796	0.0284036	0.0205202	115.611
A530020G20Rik	25.9997	15.9841	-0.100208	-0.0913869	0.484144	0.52361	-0.0061656	-0.00542009	-155.056	-124.373	0.0995662	0.0832243	0.525271	0.595711	0.0140962	0.0103723									8.14569	8.61599	-0.307644	-0.528757	0.0280839	6.64349e-05	-0.0121685	-0.0221383									-368.549	499.608	0.378858	0.339683	0.00863761	0.0194925	0.0514312	0.0435479
A530021J07Rik
A530030E21Rik									41.5793	152.166	0.334537	0.33552	0.028331	0.0278411	0.0361035	0.0323797
A530032D15Rik									23.3242	38.6669	0.539151	0.572011	0.000191181	6.14309e-05	0.0418465	0.0381227									79.3417	395.069	0.731583	0.719976	1.07384e-09	2.60802e-09	0.104224	0.0942545
A530040E14Rik									31.5228	37.4219	0.494721	0.549587	0.000745316	0.000135021	0.0494424	0.0457186																	-957.866	-314.682	0.243343	0.227722	0.0821494	0.104456	0.0360224	0.0301126	195.899	369.706	0.506478	0.472779	0.000280717	0.000791455	0.0544191	0.0465357
A530041M06Rik	14.5775	12.0987	-0.444784	-0.4799	0.00107492	0.000365879	-0.0320547	-0.0313092	14.183	14.3995	-0.0698384	-0.165152	0.656312	0.289896	-0.00431224	-0.00803607	7.74806	8.88889	0.0428127	-0.0383898	0.758549	0.78285	0.0020267	-0.00150914	10.5892	12.7348	-0.368506	-0.601232	0.00779617	3.07894e-06	-0.0171593	-0.0271292	14.2843	12.8976	0.229391	0.129475	0.101871	0.360284	0.0110554	0.00514556	7.99025	8.03582	0.240306	0.0262896	0.10373	0.860758	0.00878424	0.000900855	10.296
A530046M15Rik
A530053G22Rik	10.1661	7.35162	0.00675501	0.0217986	0.962477	0.87932	0.000333309	0.00107882	107.512	71.6548	0.0585459	0.0227906	0.709209	0.884661	0.00599692	0.00227308	81.8917	92.6307	0.436523	0.443688	0.000967035	0.000778152	0.0447919	0.041256	14.3167	14.4797	-0.210841	-0.321371	0.13751	0.0214755	-0.0139809	-0.0239507	-244.847	245.23	0.0734523	0.0383386	0.60481	0.787282	0.0108304	0.00492056
A530058N18Rik									35.0391	55.089	0.054429	0.0221951	0.728851	0.887655	0.00621223	0.0024884	6.44394	7.30689	0.0681004	-0.0444881	0.624635	0.749402	0.00239338	-0.00114245	305.694	-287.219	0.30773	0.277988	0.0280374	0.0482526	0.0526506	0.0426807	31.697	30.1021	0.209845	0.180691	0.135408	0.199882	0.0162704	0.0103606
A530058O07Rik									59.1082	69.9456	0.151474	0.117321	0.332235	0.453707	0.0158977	0.0121739																	-310.635	-2441.34	0.113395	0.0813258	0.423474	0.566548	0.0155055	0.00959567
A530064D06Rik
A530064N14Rik	27.696	30.821	-0.219569	-0.211918	0.121592	0.135466	-0.0178739	-0.0171284	28.5849	53.2263	-0.00887047	-0.0636545	0.95498	0.685094	-0.000775673	-0.00449951	18.9515	42.8428	-0.124588	-0.205664	0.369392	0.135712	-0.00921986	-0.0127557	10.4532	16.0382	-0.104564	-0.343967	0.465252	0.0134569	-0.00462706	-0.0145969	15.8407	23.5705	-0.12612	-0.243661	0.372973	0.0817378	-0.00637483	-0.0122846									19.4422
A530065N20Rik	26.1181	14.3187	-0.0509689	-0.0439497	0.722441	0.759429	-0.00388224	-0.00313672	365.111	125.787	0.0218334	-0.00769787	0.889475	0.960926	0.00277922	-0.000944613
A530072M11Rik	385.576	311.746	0.0493308	0.0567681	0.731021	0.692345	0.00712962	0.00787514	45.3552	115.897	0.0275554	-0.0124829	0.860764	0.936677	0.00263014	-0.00109369	35.2877	228.538	-0.00740818	-0.0595804	0.9576	0.66868	-0.000620395	-0.00415623	48.7297	154.036	0.183665	0.0690555	0.197008	0.630158	0.0157629	0.00579302	162.38	-1808.88	0.24844	0.22356	0.0757434	0.111123	0.025042	0.0191322									232.494
A530076I17Rik	48.0849	25.7563	-0.358726	-0.357415	0.00973883	0.0100285	-0.0278499	-0.0271044									104.828	295.284	0.177557	0.171981	0.198974	0.213677	0.0214874	0.0179516																	-95.6929	-212.381	0.0368098	-0.0423837	0.805959	0.777276	0.00376165	-0.00412174
A530083I20Rik									-547.901	148.037	-0.0346655	-0.0630099	0.825338	0.68812	-0.00482099	-0.00854482	139.829	65.7007	0.129504	0.111042	0.350651	0.424074	0.01196	0.00842414
A530083M17Rik									224.883	485.982	0.0575558	0.026396	0.713917	0.866569	0.00646891	0.00274508	36.5037	65.5603	0.115913	0.0738015	0.403901	0.595861	0.0086313	0.00509547	-801.471	-298.661	0.221143	0.11671	0.118877	0.414726	0.020526	0.0105562
A630001G21Rik									16.8723	16.2905	0.0564402	0.0105137	0.719233	0.946651	0.00439942	0.000675591									30.1669	34.0218	0.556725	0.486088	2.20994e-05	0.000298916	0.041469	0.0314991	137.499	120.338	0.238327	0.202625	0.0888615	0.149692	0.023789	0.0178792	254.161	239.299	-0.000716015	-0.0645543	0.996189	0.666399	-9.30038e-05	-0.00797639	130.027
A630001O12Rik									72.9446	226.823	0.313413	0.28169	0.0407067	0.0672512	0.0355997	0.0318758																									266.248	-2820.76	-0.150875	-0.227438	0.311392	0.124176	-0.0146325	-0.0225159
A630010A05Rik									64.8312	68.7102	0.0880985	0.0626012	0.574272	0.690042	0.0100941	0.00637031
A630012P03Rik									111.489	1358.63	-0.0445532	-0.0709245	0.77665	0.651306	-0.0066734	-0.0103972									-1424.82	-117.769	0.174124	0.114298	0.221697	0.424501	0.0263008	0.016331
A630023A22Rik
A630023P12Rik
A630031M04Rik									177.118	92.736	-0.0960475	-0.123676	0.540084	0.429444	-0.0124101	-0.016134
A630035G10Rik
A630050E04Rik
A630052C17Rik	28.5774	23.8062	-0.314158	-0.308716	0.0247621	0.0275126	-0.0195409	-0.0187954	40.7181	58.7822	-0.11243	-0.165504	0.472874	0.288855	-0.012314	-0.0160378	9.86905	18.7865	-0.124168	-0.186113	0.371019	0.177836	-0.00521986	-0.0087557	11.3056	16.9551	-0.368873	-0.543933	0.00773029	3.70076e-05	-0.015226	-0.0251959	30.6706	40.8129	0.0830021	-0.00546569	0.558549	0.969324	0.00550748	-0.000402322	33.4374	36.0936	0.470673	0.409088	0.000841505	0.00430164	0.0364276	0.0285442	11.1929
A630072L19Rik									151.804	99.7166	0.202376	0.185273	0.193096	0.234264	0.0225886	0.0188648	-251.308	-125.252	0.127537	0.108765	0.358078	0.433695	0.0157505	0.0122146	-286.486	-1902.14	-0.023204	-0.109389	0.871602	0.444791	-0.00284767	-0.0128175									-248.927	244.835	0.0257302	-0.0369634	0.863692	0.805164	0.00328698	-0.00459641
A630072M18Rik	-50.8738	-244.756	0.0180562	0.0236958	0.899921	0.868905	0.00231141	0.00305692																	-181.107	357.858	-0.109692	-0.23262	0.443524	0.100451	-0.00804819	-0.018018	-67.3636	-261.2	-0.0540896	-0.104754	0.70332	0.459866	-0.00610158	-0.0120114
A630073D07Rik
A630081D01Rik									25.2076	44.1033	0.0627324	0.00834807	0.689425	0.957629	0.00419804	0.000474206	34.3251	164.371	-0.0247453	-0.0747361	0.859028	0.5912	-0.00216654	-0.00570238	165.965	-285.331	0.342117	0.281857	0.0139991	0.0450928	0.0452057	0.0352359
A630089N07Rik	989.618	70.0521	-0.225829	-0.23082	0.111066	0.103184	-0.0279531	-0.0272076	16.9546	11.7609	-0.12228	-0.249342	0.434713	0.106864	-0.00812059	-0.0118444	15.7355	15.8096	0.0460515	-0.00876939	0.740897	0.949818	0.00303453	-0.000501304	18.167	14.2835	0.210673	0.0197836	0.13783	0.890403	0.0108281	0.000858288	35.4243	18.1245	0.382196	0.396025	0.00517277	0.00365839	0.0249133	0.0190035	23.863	14.632	0.464903	0.425958	0.000993466	0.00283374	0.0300526	0.0221692	22.0979
A730004F24Rik
A730009L09Rik																	146.403	-123.605	0.0258838	-0.00745162	0.852612	0.957351	0.00282276	-0.000713071
A730011C13Rik									33.7723	46.1797	0.0493718	0.00182185	0.753214	0.990749	0.00383164	0.000107805	27.2539	69.0109	0.00560236	-0.0555039	0.967929	0.690164	0.000389605	-0.00314623	68.2967	227.797	0.108657	-0.00843412	0.447862	0.95316	0.00928549	-0.000684356	142.792	280.064	-0.00134129	-0.0824326	0.99247	0.56126	-0.000114144	-0.00602395	84.9766	123.246	0.197578	0.114091	0.183118	0.445102	0.0177686	0.00988519	98.8045
A730017L22Rik	66.7077	19.4934	-0.172854	-0.167329	0.225139	0.24054	-0.0109464	-0.0102009	41.4308	18.7471	-0.0586556	-0.175714	0.708688	0.259711	-0.00365879	-0.00738262	9.64989	10.0271	-0.151672	-0.245426	0.273594	0.0736506	-0.005	-0.00853583	13.441	10.713	0.139223	-0.129826	0.329878	0.363873	0.0050789	-0.00489095	35.9639	16.1512	0.0612501	-0.0812478	0.666215	0.566921	0.00253337	-0.00337643	19.7137	10.0818	0.245004	0.0879272	0.0969468	0.556729	0.0112802	0.00339677	17.4093
A730018C14Rik																	-152.475	-73.4361	0.272466	0.27173	0.0462341	0.0468506	0.0402716	0.0367357
A730020E08Rik									59.3468	57.1426	0.0569704	0.0177181	0.716705	0.910212	0.00526838	0.00154454	11.875	13.2311	0.176037	0.0997968	0.20291	0.472764	0.00698491	0.00344908									-958.681	219.43	-0.0146669	-0.0695249	0.917805	0.624306	-0.00193718	-0.00784698	99.2511	48.0773	0.0817178	-0.0225809	0.585026	0.880246	0.00629738	-0.00158601	165.419
A730020M07Rik	55.4473	34.2007	0.222892	0.244648	0.115914	0.0835898	0.0167686	0.0175141									52.2784	420.685	-0.227282	-0.27765	0.0983713	0.0420812	-0.0188899	-0.0224258	48.6029	68.2252	0.0230418	-0.128913	0.872492	0.367287	0.00170074	-0.00826911	53.6448	54.4171	-0.00202657	-0.0796834	0.988624	0.574436	-0.00015278	-0.00606258									55.1005
A730032A03Rik
A730035I17Rik																	137.817	-102.309	0.226424	0.193143	0.0996814	0.16172	0.0216014	0.0180655
A730036I17Rik									50.4579	46.9912	0.0128446	-0.0284124	0.934846	0.856478	0.00128901	-0.00243482	-607.75	-98.0914	-0.0796418	-0.120998	0.567009	0.383451	-0.00890318	-0.012439
A730045E13Rik
A730046J19Rik																	-1140.72	-211.918	0.0167475	-0.0160493	0.904327	0.908298	0.00188046	-0.00165538	708.374	246.126	0.43131	0.388844	0.00157818	0.00480288	0.067874	0.0579042	-141.294	5419.03	-0.103204	-0.167773	0.466568	0.234493	-0.0140921	-0.0200019
A730049H05Rik	-198.971	175.67	-0.0196004	-0.0139567	0.891412	0.922564	-0.00245665	-0.00171113	85.2495	88.9557	-0.0456659	-0.110668	0.77122	0.479884	-0.0031122	-0.00683604									59.6576	56.7616	-0.102602	-0.245547	0.473711	0.0824258	-0.00793714	-0.017907	-1134.6	180.672	0.018093	-0.0462071	0.898696	0.744971	0.00180605	-0.00410376									22.4396
A730056A06Rik																	22.9725	45.7798	0.00784021	-0.0445645	0.95513	0.748986	0.000508452	-0.00302738									266.747	222.095	0.0529839	-0.00497614	0.709113	0.972071	0.00542923	-0.000480571
A730060N03Rik																	11.1705	21.3832	-0.16532	-0.23585	0.232218	0.0859983	-0.00734896	-0.0108848
A730062M13Rik									133.159	-4532.96	-0.124237	-0.147625	0.427339	0.344809	-0.0207996	-0.0245235
A730063M14Rik									85.7813	-1519.93	-0.0384298	-0.07298	0.806715	0.641874	-0.00446628	-0.00819011	84.2	-102.77	0.131176	0.106811	0.344412	0.44205	0.0136074	0.0100716	338.86	-118.656	0.314916	0.229365	0.0243979	0.105436	0.0360102	0.0260403
A730065G17Rik									215.044	494.408	-0.0117929	-0.0409495	0.940171	0.794308	-0.00142451	-0.00514834
A730071L15Rik
A730081D07Rik																	15.0044	42.1585	0.14425	0.0685761	0.298029	0.622211	0.0076829	0.00414706
A730082K24Rik									-7654.39	-153.682	0.0204983	-0.00562394	0.896195	0.971448	0.00293865	-0.000785187
A730085K08Rik
A730089K16Rik									27.9902	32.1305	-0.0224829	-0.0578292	0.886208	0.712615	-0.00273493	-0.00645876	249.362	-90.788	0.0949011	0.0642767	0.494858	0.644253	0.0102377	0.00670185
A730090N16Rik									69.6137	-111.193	-0.00608304	-0.0354537	0.969118	0.82143	-0.000887472	-0.0046113	18.8798	261.634	0.00504489	-0.0435098	0.971119	0.754739	0.000408889	-0.00312694
A730091E23Rik	-128.328	222.158	-0.0915036	-0.0896036	0.523078	0.531778	-0.0103843	-0.00963876	53.9209	54.0704	0.0826296	0.0405878	0.59835	0.796086	0.00705832	0.00333449	34.2942	47.8022	0.299126	0.291588	0.0280017	0.03241	0.0197463	0.0162104	56.8102	52.0109	-0.057721	-0.221699	0.687443	0.11793	-0.00383787	-0.0138077	534.261	112.457	0.0307849	-0.0271294	0.828483	0.848594	0.0033897	-0.0025201	63.8792	39.9835	-0.0560815	-0.163356	0.708094	0.272578	-0.00441477	-0.0122982	80.3066
A830005F24Rik																	30.3281	-204.392	0.0879574	0.0534949	0.527089	0.700843	0.00843754	0.0049017
A830008E24Rik									351.583	122.987	0.0408288	0.0141657	0.794901	0.928162	0.00547071	0.00174688	296.933	301.663	0.279629	0.292652	0.0405786	0.0317549	0.0328843	0.0293484									-114.322	-635.819	0.0889536	0.0627311	0.53059	0.658634	0.0158389	0.00992911									-668.619
A830009L08Rik																	39.7497	245.88	-0.169939	-0.246449	0.219247	0.0724197	-0.0104723	-0.0140082
A830011K09Rik																	73.467	-546.233	0.0045758	-0.0363131	0.973803	0.794333	0.000414758	-0.00312108
A830012C17Rik
A830018L16Rik	17.6113	9.22657	-0.254877	-0.233378	0.0710743	0.0993147	-0.0135854	-0.0128399	57.2867	27.8333	0.0955085	0.0601326	0.542371	0.701688	0.00894652	0.00522269	4.28105	5.284	-0.314623	-0.327994	0.0204994	0.015467	-0.00740439	-0.0109402	67.0842	28.7069	-0.315423	-0.45266	0.0241572	0.000852507	-0.0256465	-0.0356163	-4706.09	43.9856	0.11313	0.0768272	0.424564	0.588272	0.0131767	0.00726691
A830019L24Rik
A830019P07Rik																	72.7367	834.876	0.224983	0.203418	0.101915	0.14013	0.0233959	0.01986
A830029E22Rik									63.8042	-219.609	-0.0548939	-0.0941273	0.726624	0.548252	-0.00582614	-0.00954997	74.7899	-93.2548	0.132409	0.112955	0.339859	0.416084	0.0163033	0.0127675
A830031A19Rik																	34.0722	-95.1358	0.0346086	-0.00372914	0.803791	0.978649	0.00319053	-0.000345299
A830035O19Rik	37.9941	39.3374	0.00108563	0.0113836	0.993967	0.936808	7.04545e-05	0.000815967	132.59	-404.489	0.220181	0.204754	0.155971	0.187804	0.0291409	0.0254171	26.8592	123.37	0.205876	0.146898	0.135299	0.289155	0.0145522	0.0110164	26.9848	47.5238	0.13725	-0.00151429	0.336847	0.991586	0.00986273	-0.000107115	67.3155	145.138	-0.338776	-0.378582	0.0140223	0.00564948	-0.0285389	-0.0344487	28.2518	39.1869	0.112655	-0.00448595	0.450889	0.976126	0.00758073	-0.000302653	31.6693
A830036E02Rik																	7.36329	8.03331	0.131259	0.0245253	0.344105	0.860268	0.00445611	0.00092028																	-85.1042	-2351.42	0.0697127	0.00992941	0.641485	0.947186	0.00928308	0.00139969
A830052D11Rik																	44.8709	-301.681	0.316904	0.277909	0.0195538	0.0418814	0.0278145	0.0242787	101.299	-235.135	0.0995023	-0.0038678	0.487244	0.97851	0.0095733	-0.000396541
A830073O21Rik																	9.97701	14.1015	0.0463123	-0.033696	0.739481	0.808867	0.00201088	-0.00152495									50.503	41.0493	-0.230699	-0.329096	0.0998808	0.0172082	-0.0163506	-0.0222604									-144.161
A830082K12Rik									-530.157	115.7	0.045624	0.0167783	0.771425	0.914957	0.00577747	0.00205364	10.8708	10.6062	-0.160726	-0.230789	0.245632	0.0931496	-0.0050132	-0.00854903	-125.642	81.5026	-0.0286283	-0.185239	0.841935	0.193132	-0.00199215	-0.011962	-94.7925	67.2468	0.0911158	0.0313787	0.520606	0.825226	0.00811734	0.00220753
A830082N09Rik									78.5086	38.8652	0.167454	0.139097	0.28313	0.373694	0.0173926	0.0136687	11.5667	10.4445	0.0397598	-0.0559287	0.775299	0.687913	0.00142102	-0.00211481									-248.655	54.8584	0.292237	0.285769	0.0355307	0.0400086	0.0292891	0.0233793									-154.48
A830092H15Rik																	38.0364	657.123	-0.00737585	-0.0483228	0.957785	0.728597	-0.000647192	-0.00418303
A930001A20Rik
A930001C03Rik																																									74.4943	84.8351	-0.284031	-0.337575	0.0530101	0.0203105	-0.0252665	-0.0331499	31.1219
A930001M01Rik	90.656	22.9073	-0.337073	-0.328684	0.0155736	0.0185264	-0.0208036	-0.0200581	31.9183	17.5243	0.247878	0.28663	0.109007	0.0623941	0.0176676	0.0139437	40.7618	36.3114	0.110666	0.0845248	0.425657	0.543397	0.00968391	0.00614807	31.9454	23.5794	-0.0406861	-0.219204	0.776816	0.122229	-0.00227991	-0.0122498	99.1153	29.9439	0.0709949	-0.01413	0.616978	0.920804	0.00508384	-0.000825967	27.2215	15.6895	-0.0442466	-0.201145	0.767753	0.175178	-0.00234764	-0.010231	56.91
A930002C04Rik									70.2405	127.479	-0.154794	-0.205466	0.321622	0.186241	-0.0177738	-0.0214977	42.7082	132.851	0.0364794	-0.00220324	0.793412	0.987385	0.00335216	-0.000183676									18.3182	18.2957	0.0555576	-0.0577823	0.695653	0.684092	0.00296702	-0.00294278
A930002H02Rik
A930002I21Rik
A930003A15Rik
A930003O13Rik									-269.926	491.043	-0.0754158	-0.101119	0.630767	0.518796	-0.0120722	-0.0157961	52.5908	38.9829	0.145467	0.115327	0.29393	0.4063	0.0110939	0.00755808	-100.738	-321.233	0.208283	0.149139	0.142458	0.296247	0.0285401	0.0185703	-75.1576	-370.922	0.154545	0.127144	0.273982	0.36907	0.0227125	0.0168027									-59.8558
A930004D18Rik	132.334	49.5207	-0.159356	-0.160803	0.264005	0.259636	-0.0158611	-0.0151155	87.6276	104.443	-0.219941	-0.277594	0.156432	0.0715025	-0.0237534	-0.0274772	11.6912	18.2868	-0.00387666	-0.0850617	0.977805	0.540831	-0.00015213	-0.00368796	22.332	23.9925	0.331601	0.167464	0.0174501	0.240154	0.0201613	0.0101915	17.3534	15.7359	0.153972	0.0339126	0.275788	0.811361	0.00765092	0.00174112	-109.763	-157.432	0.0182363	-0.0399932	0.903164	0.789544	0.00253672	-0.00534667	16.1023
A930004J17Rik	132.057	31.9941	-0.290988	-0.273516	0.0383009	0.0521272	-0.0202594	-0.0195139	21.8957	14.5485	-0.0841344	-0.199485	0.591681	0.199668	-0.00513196	-0.00885579	21.0788	23.0859	-0.189161	-0.268867	0.170711	0.0493103	-0.0110985	-0.0146344	23.3149	19.6432	-0.0156248	-0.217182	0.913343	0.1258	-0.000792538	-0.0107624	76.046	35.04	0.065795	-0.0103783	0.643061	0.941789	0.00518683	-0.00072297	27.549	17.186	0.116698	-0.0057945	0.4347	0.969165	0.00754997	-0.000333419	29.9503
A930005G22Rik
A930005H10Rik	16.8098	14.8155	-0.162121	-0.140548	0.255702	0.32525	-0.00777595	-0.00703044	29.6953	37.5164	0.230609	0.221446	0.136809	0.153547	0.0176388	0.0139149	9.62286	19.6001	-0.0286482	-0.102132	0.837074	0.462414	-0.00108023	-0.00461607	14.103	21.3739	-0.268776	-0.479043	0.0565051	0.000376148	-0.0105726	-0.0205424	18.3299	20.1018	0.0840364	-0.0335367	0.553641	0.813414	0.00421339	-0.00169642	27.1855	30.8707	0.292787	0.166977	0.0458037	0.261944	0.0189634	0.01108	14.2268
A930005N03Rik																	95.6957	-78.121	0.0869147	0.0607246	0.532017	0.662696	0.0106503	0.00711442
A930006I01Rik									297.175	-400.222	0.110836	0.0879439	0.479212	0.574946	0.0191651	0.0154412
A930006K02Rik									27.6372	60.5261	-0.0292664	-0.0713162	0.852212	0.649504	-0.00303886	-0.0067627	36.2309	-172.054	0.182759	0.153381	0.18592	0.268158	0.0161894	0.0126535	37.2605	541.687	0.16186	0.0391324	0.256476	0.785132	0.0131655	0.00319563
A930006L05Rik	19.8061	14.5801	-0.433989	-0.449667	0.00146398	0.000931624	-0.0257747	-0.0250292	22.7799	19.0864	0.120311	0.101654	0.442201	0.516576	0.00871048	0.00498665	12.5371	13.9324	0.0886646	0.0402702	0.523759	0.772491	0.00564997	0.00211413	11.5943	11.7764	0.202323	-0.0130252	0.154497	0.927718	0.00942982	-0.000540029	16.0525	16.2793	-0.041786	-0.141562	0.768661	0.3168	-0.00235556	-0.00826537	15.234	12.3299	0.332965	0.222314	0.0222008	0.133114	0.0176085	0.00972507	12.3918
A930007I19Rik	-645.556	42.2156	-0.120399	-0.115016	0.400029	0.421576	-0.00897715	-0.00823163	122.272	72.3762	-0.0269881	-0.0739267	0.863604	0.637547	-0.00278511	-0.00650894	65.0759	73.4183	0.107135	0.0757356	0.440661	0.586234	0.00875771	0.00522187	43.6976	32.6954	0.213139	0.0342568	0.133176	0.811379	0.0119065	0.00193669	-264.361	142.54	0.244167	0.218522	0.0810857	0.119623	0.0262285	0.0203187	-297.163	104.078	0.279083	0.200746	0.0574707	0.176055	0.0248662	0.0169828	106.208
A930009A15Rik									46.4941	-338.965	0.253424	0.206138	0.101061	0.184773	0.0251133	0.0213895
A930012L18Rik																	16.1969	27.8934	0.153645	0.0963626	0.267328	0.488207	0.00768122	0.00414538	-1113.39	-150.933	0.108709	0.0387834	0.447644	0.787003	0.014893	0.0049232
A930012O16Rik	29.4209	34.3302	0.0759657	0.0853454	0.596236	0.551532	0.00483747	0.00558298	308.426	-105.286	0.267863	0.25407	0.0824527	0.100164	0.0366376	0.0329138									17.6218	38.2897	0.138658	-0.0552508	0.331865	0.700176	0.00708029	-0.00288956									200.99	-220.942	0.394539	0.336308	0.00606426	0.0208164	0.0443449	0.0364615	62.0438
A930014E10Rik
A930016O22Rik																																	31.7067	39.8203	-0.27457	-0.310567	0.0488541	0.0250376	-0.0167921	-0.0227019
A930017K11Rik																	12.6487	20.1483	0.43212	0.344129	0.00110262	0.0108344	0.0255571	0.0220213																									17.4417
A930017M01Rik	-256.293	37.6541	0.284947	0.307487	0.042692	0.028168	0.0219804	0.0227259	80.2771	43.7812	-0.134178	-0.190751	0.390988	0.220476	-0.0139184	-0.0176422	6.96335	6.70231	0.233313	0.128547	0.0895265	0.354253	0.00778227	0.00424644									65.2625	20.5285	0.413648	0.387066	0.00230262	0.00458638	0.0253554	0.0194456									-121.784
A930018P22Rik
A930019D19Rik	71.7413	185.462	-0.0329389	-0.0282055	0.81851	0.84424	-0.00416941	-0.0034239	39.2816	309.291	-0.00634245	-0.0418342	0.967802	0.789963	-0.000712056	-0.00443589	53.1568	-278.269	0.0400211	0.0173322	0.773862	0.901003	0.00588732	0.00235149	35.993	331.92	-0.159549	-0.276564	0.263422	0.0494603	-0.0150423	-0.0250121									63.832	-556.858	-0.00310178	-0.0760486	0.983491	0.611411	-0.000345439	-0.00822883	57.8156
A930023M06Rik
A930024E05Rik									83.6818	457.862	0.227146	0.215351	0.142968	0.16548	0.0298859	0.0261621	23.195	76.3767	0.0167684	-0.0377764	0.904208	0.786237	0.0011143	-0.00242153																	1571.83	-174.28	0.310485	0.254456	0.0336647	0.0843428	0.0341448	0.0262614
A930027H12Rik
A930027P06Rik
A930028N01Rik	15.7348	28.3308	-0.266178	-0.282852	0.0590278	0.0443079	-0.021799	-0.0210535									18.2337	292.429	-0.00581138	-0.0500644	0.966733	0.719211	-0.000530769	-0.0040666	8.96905	18.3861	-0.245964	-0.424935	0.0818901	0.00188247	-0.0154589	-0.0254288	13.2631	29.5366	-0.0332091	-0.104098	0.815204	0.462699	-0.00268186	-0.00859167
A930029G22Rik									73.7953	-588.501	0.0343688	-0.00370723	0.82681	0.981177	0.0033889	-0.000334934	21.0164	85.6848	-0.0524282	-0.110758	0.706537	0.42527	-0.0032214	-0.00675723	49.5394	297.879	0.129689	0.00489929	0.364383	0.972781	0.0103445	0.000374617
A930030B08Rik																	-606.48	-108.936	0.126184	0.098648	0.363241	0.4779	0.0128296	0.00929377
A930032L01Rik
A930033H14Rik	42.4343	30.1329	0.41116	0.404456	0.00272419	0.00324319	0.0345189	0.0352644	54.0296	60.4023	-0.00796135	-0.0617531	0.95959	0.694035	-0.000734926	-0.00445876	30.3131	83.6217	-0.315167	-0.368669	0.0202704	0.00608587	-0.0184509	-0.0219868	24.9323	28.1849	-0.0262155	-0.18854	0.855107	0.185177	-0.00170183	-0.0116717	89.6351	68.3077	0.121143	0.0585386	0.392277	0.680178	0.0104309	0.00452111	-158.977	-198.578	0.32978	0.275227	0.0235915	0.0611518	0.0417773	0.0338939	74.0865
A930036I15Rik																	20.6319	71.5384	0.0709399	0.0323355	0.61023	0.816447	0.00625606	0.00272022
A930037H05Rik	113.925	14.1341	0.0750242	0.102519	0.60081	0.474072	0.00419114	0.00493666	52.2728	20.1528	-0.10825	-0.202895	0.489589	0.19193	-0.00818122	-0.0119051	35.0846	19.3436	0.4232	0.464767	0.00143075	0.000399197	0.0270848	0.023549	26.9105	11.8645	0.042546	-0.231857	0.766893	0.101602	0.00170936	-0.00826048	96.5299	15.4973	0.056896	-0.0660652	0.688689	0.641695	0.00312108	-0.00278872	100.351	18.6638	-0.0814293	-0.237932	0.586356	0.107294	-0.00479257	-0.012676	78.8889
A930038B10Rik																																																	-113.093
A930040O22Rik																	22.3897	71.9788	-0.0677047	-0.116633	0.626653	0.400968	-0.0067488	-0.0102846																									48.2872
A930041C12Rik									49.9726	-162.171	0.146677	0.131932	0.347949	0.399038	0.0202754	0.0165515	37.5523	-64.2546	-0.16631	-0.217094	0.229396	0.11483	-0.0174446	-0.0209805
A930104D05Rik
AA386476	127.498	66.0353	-0.0347248	-0.0281183	0.80885	0.844716	-0.003009	-0.00226348	30.8103	38.6613	-0.0152105	-0.0820671	0.922879	0.600852	-0.00113174	-0.00485557	24.0208	71.5901	0.0778126	0.0168784	0.575975	0.903582	0.00454663	0.0010108	33.2206	53.2844	-0.151567	-0.280769	0.288363	0.0459635	-0.0108799	-0.0208498	74.7168	90.9458	0.0788362	-0.000634373	0.578524	0.996439	0.00586406	-4.57475e-05	30.9828	32.0165	0.0653078	-0.0473445	0.662737	0.751991	0.00469404	-0.00318935	35.448
AA413626									58.6152	-109.764	0.097241	0.076982	0.535037	0.623668	0.0140514	0.0103275
AA414768									107.865	-193.808	0.180443	0.173565	0.246899	0.265674	0.0264484	0.0227245	8.86463	23.0119	-0.199333	-0.242694	0.14844	0.0770202	-0.00878566	-0.0123215	58.6885	-543.818	0.226802	0.130743	0.109494	0.360467	0.022663	0.0126932																	112.118
AA414992																	95.3863	-125.092	0.514611	0.490165	6.86216e-05	0.000168343	0.0658711	0.0623352
AA465934	36.1117	130.469	-0.311745	-0.286159	0.0259518	0.0417794	-0.0261699	-0.0254243	41.0382	-266.6	-0.0423861	-0.0846805	0.787256	0.589269	-0.00464802	-0.00837185	25.5549	-246.514	-0.19709	-0.241617	0.153155	0.0783823	-0.0173335	-0.0208693									43.2938	-889.546	-0.35495	-0.421208	0.009822	0.00187333	-0.0347248	-0.0406346	46.3858	-325.424	0.025463	-0.054758	0.865095	0.714688	0.00259867	-0.00528472	79.9946
AA467197									47.7298	174.552	0.0804597	0.053607	0.608024	0.732793	0.0111655	0.00744165																									10.8295	16.9421	-0.289076	-0.329154	0.0487536	0.023873	-0.0208885	-0.0287719
AA474408	131.292	46.8954	-0.333454	-0.338915	0.0167941	0.0149821	-0.0292484	-0.0285029	57.7027	48.0529	0.0275191	-0.0159384	0.860946	0.9192	0.00266991	-0.00105392	27.7853	47.336	-0.18162	-0.232364	0.188724	0.0908753	-0.0123834	-0.0159192	52.902	60.7213	-0.075398	-0.187753	0.598992	0.187051	-0.00662869	-0.0165985	85.1475	57.6843	-0.0188246	-0.0924861	0.894622	0.514327	-0.00167062	-0.00758042	43.5888	35.3636	0.348752	0.203455	0.016283	0.170171	0.0203821	0.0124987	30.3306
AA543401
AA545190									71.651	-968.34	-0.0433669	-0.0662392	0.782452	0.673008	-0.00623362	-0.00995745
AA792892
AA914427	26.5316	30.4594	0.429672	0.464295	0.00165187	0.000599101	0.0476699	0.0484154									59.7222	-102.891	-0.13265	-0.156346	0.338973	0.258905	-0.0142327	-0.0177685	66.1723	432.884	-0.492031	-0.53988	0.000245271	4.3387e-05	-0.0776505	-0.0876204																	220.871
AA986860	58.284	28.2862	0.190861	0.201369	0.179726	0.156492	0.0134112	0.0141567	33.8432	29.7539	0.0930877	0.0523259	0.552699	0.738952	0.00689266	0.00316882	23.5584	35.1265	0.226054	0.168683	0.100252	0.222724	0.0133864	0.00985059	38.805	35.5888	0.235726	0.110327	0.0958646	0.440874	0.0170692	0.00709934	943.909	119.831	0.107497	0.0490436	0.448133	0.729892	0.0095912	0.0036814	8.03396	8.52016	-0.39579	-0.461233	0.00589121	0.00110245	-0.0241286	-0.032012	9.59565
AB041806																	23.4839	131.779	0.0720926	0.00538966	0.604424	0.969146	0.00384306	0.000307226
AB124611	190.905	404.014	0.1209	0.127598	0.398056	0.372235	0.016134	0.0168795	15.7306	19.2113	0.0114644	-0.0227702	0.941834	0.884764	0.00131503	-0.00240881									13.1193	19.4289	0.652205	0.513289	2.15967e-07	0.000117279	0.0385658	0.0285959	66.2235	349.659	0.0124025	-0.0557186	0.930461	0.694814	0.00111094	-0.00479886	304.567	-164.301	0.342313	0.290054	0.018511	0.0479617	0.0435994	0.035716	37.565
AF067061
AF366264
AI115009									163.15	-325.828	0.0811636	0.0603274	0.604879	0.700766	0.0121606	0.00843673	21.6686	69.4325	-0.167957	-0.216989	0.224749	0.11501	-0.0110447	-0.0145806
AI182371									202.384	742.538	-0.0307788	-0.0613089	0.844666	0.69613	-0.00394988	-0.00767372
AI197445									1236	171.623	0.00166854	-0.026562	0.991527	0.865737	0.000228736	-0.0034951																																	-161.499
AI314278																																																	5.13356
AI413582	17.4487	18.7806	0.157742	0.153228	0.268936	0.283049	0.00833142	0.00907693	22.7368	31.1452	0.145974	0.11289	0.35029	0.471054	0.0138001	0.0100763	5.1837	10.9936	0.154726	0.0383694	0.263935	0.782963	0.00566942	0.00213358	9.66085	14.2011	0.699301	0.434409	1.14105e-08	0.00144675	0.0322582	0.0222883	14.9485	23.0381	0.00957061	-0.0919537	0.946312	0.516762	0.000455806	-0.005454	11.8541	14.4627	-0.147107	-0.299066	0.323771	0.0411435	-0.00721408	-0.0150975	10.8037
AI429214	-96.7316	-107.015	-0.0859659	-0.0812012	0.548632	0.571086	-0.0112453	-0.0104998																	132.568	-257.161	-0.0102158	-0.104011	0.94328	0.467625	-0.000996591	-0.0109664
AI463170
AI463229									56.2841	90.0912	0.188991	0.169972	0.224841	0.27585	0.0167407	0.0130168
AI467606	169.664	141.976	-0.0410612	-0.0335243	0.774812	0.815341	-0.00454484	-0.00379933	14.6943	15.6443	-0.0355944	-0.0806762	0.820733	0.607056	-0.00377288	-0.00749671	23.0244	90.2062	-0.0681708	-0.105808	0.624276	0.446372	-0.00443754	-0.00797337	9.61073	11.4801	0.396516	0.222278	0.00396928	0.116948	0.0213398	0.01137	22.813	29.6019	0.045674	-0.0592703	0.747815	0.676399	0.00258962	-0.00332018	20.9489	24.2418	-0.304388	-0.419901	0.0375043	0.00329995	-0.0239218	-0.0318051	24.7774
AI480526	62.7487	22.9517	-0.0560364	-0.0486818	0.696118	0.734429	-0.00395361	-0.0032081	53.3436	37.4616	0.0788496	0.0469677	0.615246	0.764881	0.00733711	0.00361328	16.9811	20.9184	-0.0738638	-0.135303	0.59555	0.329311	-0.00367311	-0.00720895	26.6141	21.9515	-0.351724	-0.536625	0.0113744	4.92244e-05	-0.0208297	-0.0307996	56.8261	32.687	0.00513889	-0.086765	0.971158	0.540791	0.000288224	-0.00562158	29.1566	18.5063	0.22188	0.103161	0.133892	0.49017	0.0140162	0.00613284	24.9042
AI504432									29.5235	20.4209	0.342565	0.326922	0.0245332	0.0323719	0.0227423	0.0190185	15.6305	17.3799	-0.0334179	-0.102235	0.810414	0.461961	-0.00153546	-0.00507129									-104.646	-472.797	0.175316	0.157069	0.213816	0.266127	0.0294198	0.02351	-80.9401	-210.639	0.265334	0.226382	0.0714644	0.12598	0.0464152	0.0385318
AI506816	21.4098	11.6894	-0.129664	-0.132868	0.364477	0.352644	-0.00751354	-0.00676802	14.141	11.6788	-0.165234	-0.236082	0.289653	0.127482	-0.0174015	-0.0211254	16.9048	22.8697	-0.18863	-0.235911	0.171938	0.0859142	-0.00883453	-0.0123704	4.42967	5.14035	-0.131486	-0.373981	0.357719	0.0068631	-0.00408481	-0.0140547	8.23776	8.1376	-0.108515	-0.2224	0.443822	0.113038	-0.00417791	-0.0100877	9.48976	6.33668	0.320364	0.256946	0.0281359	0.0812461	0.0202894	0.012406	10.0716
AI593442									260.308	96.1067	-0.135624	-0.177088	0.385858	0.255942	-0.015124	-0.0188478	3.39659	4.05837	-0.341367	-0.373376	0.0115299	0.00542108	-0.0115477	-0.0150835									62.0858	28.5443	0.298158	0.25901	0.0318031	0.0637211	0.0266573	0.0207475
AI597479	7.20301	4.68031	0.0392068	0.0738162	0.784733	0.606701	0.00150027	0.00224578	20.2429	16.4428	0.018614	-0.0274345	0.905692	0.861369	0.00174478	-0.00197905	3.11568	4.86352	-0.0468082	-0.146885	0.736792	0.289196	-0.0010799	-0.00461574	5.0774	5.50325	0.240341	-0.0757274	0.0893519	0.597393	0.00747713	-0.00249272	3.47967	5.73876	-0.0845716	-0.194726	0.551109	0.166562	-0.00193656	-0.00784636	7.52833	5.29581	0.263987	0.0840115	0.0729692	0.574498	0.010422	0.00253865	7.77088
AI606473	180.864	91.1572	-0.0386309	-0.0324241	0.787821	0.8213	-0.00397493	-0.00322941
AI661453																									226.453	108.636	0.465298	0.375323	0.000580812	0.00664988	0.0498856	0.0399157									15.7365	12.6364	-0.231222	-0.35336	0.117871	0.0148321	-0.011658	-0.0195414	37.1693
AI662270									19.9996	20.3461	-0.0576115	-0.103703	0.713651	0.508114	-0.0056926	-0.00941643									53.4731	65.5254	0.276966	0.166552	0.0491168	0.242762	0.0224195	0.0124496									157.915	112.096	0.296134	0.247259	0.0432683	0.093815	0.0339263	0.0260429
AI837181	4.46526	5.01808	-0.0456429	-0.0185957	0.750454	0.896947	-0.00133075	-0.000585241	15.1018	17.8396	-0.015465	-0.0613379	0.921592	0.695993	-0.00150713	-0.00523096	2.5939	6.39565	0.0120659	-0.0780905	0.930994	0.574609	0.000279131	-0.0032567	2.59076	4.87613	-0.158017	-0.437717	0.268092	0.00131734	-0.00314149	-0.0131113	4.05703	8.21679	-0.257007	-0.273341	0.0658737	0.0499147	-0.00705424	-0.012964	3.99735	4.41748	0.08456	-0.195155	0.571994	0.188655	0.00247503	-0.00540836	4.1968
AI838599									51.4117	45.0738	0.00188871	-0.0392251	0.99041	0.802794	0.000182937	-0.0035409									38.3847	31.8858	-0.138972	-0.286048	0.33076	0.0418626	-0.0114125	-0.0213823	102.524	43.6268	0.217873	0.196828	0.120754	0.161942	0.0208174	0.0149076									24.4904
AI839979									26.4794	39.4186	-0.119625	-0.166878	0.444827	0.284815	-0.0136995	-0.0174233	83.198	-94.5361	-0.0210762	-0.0557173	0.879762	0.689033	-0.00227597	-0.0058118									26.5132	42.8146	0.130022	0.0485008	0.358241	0.73277	0.00965677	0.00374696
AI847159
AI849053																	15.4062	34.3886	-0.0955671	-0.148886	0.491821	0.282603	-0.00435629	-0.00789212
AI854703	54.9248	26.224	0.351557	0.383829	0.011416	0.00542742	0.0316761	0.0324216	193.504	132.94	0.1052	0.0748254	0.501978	0.633452	0.0101004	0.00637653	4.4245	7.44346	0.0136839	-0.0792911	0.921768	0.568723	0.000359095	-0.00317674	-319.58	-697.068	0.474442	0.432319	0.00043592	0.00153425	0.0601494	0.0501796																	6.79872
AI987944	28.495	17.3998	-0.0456062	-0.0393085	0.750649	0.784188	-0.00367129	-0.00292578	15.8339	8.68066	0.130871	0.124576	0.402877	0.426068	0.00782982	0.00410599	7.43608	7.69032	0.221551	0.13687	0.107388	0.32369	0.00781756	0.00428172	8.34911	7.0317	0.299443	0.0286717	0.0327865	0.841698	0.010868	0.000898113	9.80041	8.77428	0.073897	-0.0753325	0.602619	0.595571	0.00284672	-0.00306308	8.24479	7.67831	0.411631	0.156702	0.00404473	0.292854	0.0135899	0.00570649	6.60577
AK157302	71.2718	68.8139	-0.0494312	-0.0361901	0.730494	0.800945	-0.00371954	-0.00297403	195.451	-159.321	-0.0121358	-0.0482348	0.938434	0.758725	-0.00144355	-0.00516738	88.1939	-69.8142	0.152718	0.111443	0.270258	0.422392	0.0121008	0.00856497	-825.667	-84.9223	0.230428	0.143171	0.103788	0.31621	0.025603	0.0156332	124.254	-2224.56	0.111147	0.027584	0.432781	0.846088	0.00785333	0.00194353									-287.126
AU015336									67.587	-95.0006	-0.0660422	-0.0984719	0.673926	0.529856	-0.0069685	-0.0106923
AU015791
AU015836
AU016765
AU017674
AU019990									84.4523	296.614	0.043553	0.0126926	0.78154	0.935616	0.00515254	0.00142871
AU020206	19.4113	14.5505	-0.255761	-0.248266	0.0700668	0.0789791	-0.01657	-0.0158245	17.6067	15.9835	0.224034	0.216391	0.148675	0.163398	0.0193771	0.0156533	43.7938	90.7297	0.477165	0.474579	0.000264105	0.000288246	0.0408961	0.0373603	13.4722	12.8976	0.428232	0.280514	0.00171916	0.0461697	0.023974	0.0140042	11.4228	10.9929	0.24696	0.101288	0.0775609	0.474926	0.0103098	0.0044	13.6698	10.4069	0.496969	0.466455	0.000380197	0.000950345	0.0328972	0.0250138	22.0386
AU021092	275.765	-12210.5	0.0960019	0.100708	0.502766	0.481955	0.0122194	0.0129649	42.1835	104.565	0.426402	0.437822	0.00435514	0.00332262	0.053428	0.0497041	28.345	362.804	-0.173842	-0.199958	0.208689	0.147146	-0.0140739	-0.0176098	19.5802	42.3476	-0.093082	-0.230966	0.515904	0.10296	-0.00617188	-0.0161417	13.6515	23.9914	-0.0637212	-0.149871	0.653586	0.288933	-0.00326994	-0.00917974	40.6448	75.016	0.498929	0.473506	0.000357418	0.000774801	0.0496564	0.0417731	6.90318
AU022252	18.2372	7.7504	-0.443075	-0.373793	0.00112957	0.00689341	-0.0147572	-0.0140117	37.6737	11.5669	0.00628347	-0.0799319	0.968101	0.610388	0.000465381	-0.00325845	6.84329	8.05651	-0.217404	-0.24014	0.1143	0.0802805	-0.00604178	-0.00957761	9.12002	6.53692	-0.0309086	-0.368319	0.829525	0.00782996	-0.00081133	-0.0107812	14.8949	10.6575	-0.266668	-0.315923	0.0560059	0.0225156	-0.0109028	-0.0168126	41.773	12.753	0.27459	0.149021	0.0617776	0.317445	0.0148381	0.0069547	7.46013
AU022754
AU022793									72.7359	-380.12	0.0107	-0.0238349	0.945707	0.879414	0.00124479	-0.00247905
AU023762									223.601	397.386	0.0586174	0.0331782	0.70887	0.832723	0.0086393	0.00491547	35.423	65.6778	-0.042999	-0.101897	0.75753	0.463451	-0.00298878	-0.00652462
AU040320	7.61731	4.09962	-0.162901	-0.180888	0.253389	0.203984	-0.00599971	-0.0052542	17.7648	11.0258	0.0664836	0.0292811	0.671869	0.852138	0.00548315	0.00175932	3.43511	4.48787	0.0528371	-0.0725508	0.704352	0.602122	0.00125099	-0.00228484	4.31241	4.2187	0.133891	-0.246336	0.348915	0.0814141	0.00323737	-0.00673247	3.79415	5.29472	0.0118112	-0.147869	0.933769	0.295495	0.000256609	-0.00565319	4.40814	4.93826	-0.213264	-0.305985	0.150063	0.0364651	-0.00907025	-0.0169536	4.24745
AU040972									53.3706	-542.692	-0.00437787	-0.0420701	0.977772	0.788806	-0.000509594	-0.00423343	29.834	784.105	0.0621615	0.0285261	0.65521	0.83776	0.00595639	0.00242056	78.9558	-147.998	0.106612	0.0239356	0.456504	0.86759	0.012509	0.00253911	117.606	-187.022	0.156061	0.120313	0.269244	0.395553	0.0197319	0.0138221	103.025	-219.475	0.0905288	0.028727	0.545068	0.847994	0.0114066	0.00352319
AU041133	195.259	86.5745	0.232353	0.242942	0.100853	0.0858367	0.0260853	0.0268308	34.4357	41.4296	0.106074	0.0713111	0.49841	0.649528	0.00827295	0.00454911	9.61403	14.2406	0.053588	-0.0306052	0.700347	0.826112	0.00225394	-0.0012819	16.9891	18.929	0.47264	0.325274	0.000461575	0.0198557	0.0265766	0.0166068	20.4863	21.2281	0.212018	0.0979104	0.131317	0.489854	0.0111633	0.00525345	22.7808	23.3289	0.0196178	-0.110167	0.895867	0.461015	0.00118576	-0.00669763	16.3548
AV039307																	38.4887	-194.603	0.0586379	0.0192192	0.673624	0.890288	0.0051698	0.00163396
AV064505									66.8978	-136.614	-0.150959	-0.169746	0.333902	0.276499	-0.0241254	-0.0278493
AV099323
AV356131																	15.7657	151.651	0.151596	0.0875869	0.273834	0.528837	0.00999514	0.00645931																									23.3588
AW011738	110.738	30.2534	-0.322104	-0.297504	0.0211629	0.0339895	-0.0236502	-0.0229047	147.996	88.7643	-0.00382876	-0.0353089	0.98056	0.822148	-0.000515653	-0.00423949	55.5453	80.4806	0.0213608	-0.0298645	0.878151	0.830258	0.00136372	-0.00217211	386.891	98.699	0.24455	0.115747	0.0837182	0.418612	0.0180784	0.00810857	31.9944	23.6677	0.38392	0.223939	0.00495816	0.110503	0.0209212	0.0150114	-192.333	184.624	0.145289	0.0833313	0.329852	0.577611	0.0168599	0.00897654	-87.0784
AW046200									178.869	443.569	0.0372755	0.00882069	0.812415	0.955232	0.00477922	0.00105538	36.5621	84.4682	0.132351	0.0920412	0.340071	0.508008	0.00892036	0.00538452									-145.557	-175.801	0.0173388	-0.0271681	0.902898	0.848381	0.0024335	-0.0034763									-137.72
AW047730																	5.96044	11.5434	-0.127349	-0.171963	0.358795	0.213727	-0.00399789	-0.00753372
AW112010	7.60291	10.5556	-0.0479886	-0.0302926	0.738075	0.832874	-0.00234874	-0.00160323	18.7014	31.4937	0.456081	0.447965	0.00211395	0.00259249	0.0552503	0.0515264									5.84732	10.4508	0.234524	0.0124182	0.0976194	0.931078	0.0106325	0.000662648	6.81713	13.4643	-0.0155116	-0.118241	0.913089	0.403798	-0.000663971	-0.00657377	3.9052	5.72558	0.0987389	-0.104669	0.509056	0.483814	0.0036183	-0.00426509	13.2394
AW146154	104.544	21.9204	-0.159056	-0.169143	0.264917	0.235405	-0.0114666	-0.0107211	23.5059	12.644	-0.057822	-0.172062	0.71265	0.269901	-0.00344954	-0.00717337	13.545	11.1284	-0.0513702	-0.162914	0.7122	0.239179	-0.00211589	-0.00565172	13.1601	8.98425	0.230748	-0.0472787	0.103295	0.741815	0.00843883	-0.00153102	21.1361	9.86282	0.057875	-0.0937512	0.683612	0.508565	0.00260386	-0.00330595	15.768	8.77238	0.131825	-0.0764374	0.377087	0.609585	0.00518925	-0.00269414	13.2569
AW209491	6.61599	5.33065	-0.294693	-0.287864	0.0357973	0.0405233	-0.0103612	-0.00961567	21.5909	17.8602	0.0839768	0.0579917	0.592378	0.711843	0.00753391	0.00381008	3.70096	5.81749	-0.13837	-0.215012	0.318363	0.118438	-0.00347508	-0.00701091	5.8651	6.95093	0.0229289	-0.294932	0.873112	0.0356407	0.00066068	-0.00930916	5.54999	8.28476	-0.202822	-0.269232	0.149288	0.0535985	-0.00555118	-0.011461	13.416	10.1438	0.313727	0.227797	0.0317593	0.123568	0.0185834	0.0107	5.87392
AW495222																	15.5603	95.0872	0.381314	0.326045	0.00444316	0.0161274	0.023596	0.0200601
AW549877	15.2116	10.6827	-0.212306	-0.224024	0.134734	0.114027	-0.0206032	-0.0198577	21.564	15.7251	0.0863583	0.0611842	0.581885	0.696718	0.00865662	0.00493279	12.6662	13.3926	-0.211926	-0.24694	0.123944	0.0718353	-0.0182202	-0.021756	13.1586	11.4276	-0.0299298	-0.1509	0.834847	0.290514	-0.0026685	-0.0126383	15.458	13.6359	0.0777906	0.00576589	0.583588	0.96764	0.00642124	0.000511437	12.8002	10.672	0.384894	0.281963	0.00755302	0.0548386	0.0297214	0.021838	13.8411
AW551984									76.8659	48.602	0.00845475	-0.0263184	0.957088	0.866957	0.000928742	-0.00279509	8.0305	8.51093	0.181388	0.0856003	0.189299	0.538262	0.0071805	0.00364467									-755.582	92.7427	0.155371	0.132469	0.271396	0.349192	0.021404	0.0154942	-137.651	120.269	0.177458	0.110177	0.232739	0.460973	0.0181518	0.0102684
AW554918	65.0024	16.8722	0.0181789	0.0331808	0.899245	0.8172	0.00119372	0.00193924	18.6203	8.48743	0.124492	0.0952535	0.426383	0.543455	0.00696961	0.00324578	9.68526	8.39742	-0.0302391	-0.13215	0.828161	0.340813	-0.00113657	-0.00467241	18.7896	11.2619	0.0286029	-0.189167	0.842073	0.183693	0.00155069	-0.00841915	22.9321	11.7887	0.249137	0.151866	0.0748994	0.282486	0.0130301	0.00712028	39.2825	14.6318	0.362566	0.284657	0.0122604	0.0524658	0.0216457	0.0137623	22.7681
AW822252									-161.285	-155.795	0.000777714	-0.0243826	0.996051	0.876664	0.000124296	-0.00359954	39.8233	66.2261	0.0103545	-0.0407777	0.940763	0.769703	0.000701572	-0.00283426																									80.2463
AY358078									54.6807	183.313	-0.0368037	-0.0668179	0.814748	0.670312	-0.00499023	-0.00871406
AY512915									94.4797	59.1113	0.117792	0.0901915	0.451885	0.565175	0.0138152	0.0100914																	-226.403	126.488	0.234865	0.222582	0.0937389	0.112736	0.0285039	0.0225941
AY702103									3022.24	233.208	0.0454246	0.024457	0.772397	0.876291	0.00802149	0.00429766
Aaas	12.669	10.9996	-0.0829147	-0.06223	0.562962	0.664423	-0.00372928	-0.00298377	15.4095	13.137	0.0362973	-0.00729359	0.817253	0.962977	0.00322978	-0.000494054	5.43627	9.30527	0.0141596	-0.0806871	0.919057	0.561915	0.000421296	-0.00311454	7.82458	8.30807	0.556946	0.311544	2.18996e-05	0.0260529	0.0213081	0.0113383	8.13092	9.51279	-0.000418974	-0.144266	0.997648	0.307548	-1.44854e-05	-0.00592429	9.01738	6.34566	0.297139	0.174361	0.0425305	0.241125	0.0135525	0.00566913	5.11582
Aacs	4.90528	3.82031	0.0626653	0.0872775	0.662216	0.542526	0.00336119	0.0041067	19.19	16.0805	0.00178442	-0.0424862	0.990939	0.786765	0.000179412	-0.00354442	3.67257	5.79372	-0.156578	-0.20074	0.258191	0.145537	-0.00430915	-0.00784499	6.73144	7.62096	-0.675227	-0.724804	5.48326e-08	1.81292e-09	-0.0452864	-0.0552563	15.0364	14.0497	0.0450033	-0.0646439	0.751399	0.648894	0.00227763	-0.00363218	7.57923	5.53228	0.244948	0.100499	0.097026	0.501497	0.0117811	0.00389775	9.13144
Aadac																																									3.67711	4.99028	0.150261	-0.0221795	0.31339	0.88236	0.00666909	-0.0012143	2.02187
Aadacl2
Aadacl3
Aadacl4
Aadat									66.7633	137.847	0.0718088	0.0454672	0.647242	0.772189	0.00953211	0.00580828	67.0408	3413.48	-0.0138588	-0.0501097	0.920771	0.718967	-0.00167841	-0.00521424									351.177	12017.6	0.201126	0.18358	0.152791	0.192665	0.0275412	0.0216314									12.7116
Aagab	7.46328	4.39887	-0.057456	-0.042567	0.688805	0.766782	-0.00201366	-0.00126815	17.4324	12.217	0.0407442	-0.0020758	0.795317	0.98946	0.0035799	-0.000143931	3.60978	5.50188	-0.126005	-0.181771	0.363929	0.18835	-0.00299109	-0.00652692	5.16205	4.60025	0.582642	0.24509	7.26607e-06	0.0830163	0.0172207	0.00725086	6.33268	7.4198	-0.178754	-0.256695	0.204826	0.0662142	-0.00496842	-0.0108782	9.6127	7.34589	-0.0451183	-0.20012	0.763308	0.177433	-0.00244374	-0.0103271	3.70355
Aak1	17.7439	4.20474	0.110649	0.160179	0.439535	0.261515	0.0034328	0.00417831	24.0252	6.12128	0.0123248	-0.0863475	0.937477	0.581933	0.00077018	-0.00295365	3.29111	4.08925	-0.206432	-0.220835	0.134226	0.108557	-0.00431314	-0.00784897	11.294	3.91204	0.303668	-0.0210579	0.030288	0.883391	0.00949595	-0.000473898	10.1805	4.87135	0.218094	0.0139327	0.120368	0.921906	0.00635393	0.00044413	11.3114	4.58298	0.323237	0.0839832	0.026678	0.574628	0.0104782	0.00259479	8.02546
Aamdc	4.36106	4.94915	0.0884019	0.0841534	0.537318	0.557123	0.00216621	0.00291172	15.2202	9.75062	0.188617	0.201089	0.225778	0.196001	0.0113693	0.00764545	4.18784	7.47964	0.00147482	-0.0990231	0.991555	0.47622	3.38852e-05	-0.00350195	4.17091	7.11397	-0.163867	-0.33493	0.250548	0.0162871	-0.00398079	-0.0139506	4.96485	7.20815	-0.023859	-0.149492	0.866669	0.290168	-0.00064691	-0.00655671	4.38932	6.03104	-0.503947	-0.504141	0.000304589	0.000302692	-0.0157346	-0.023618	4.33207
Aamp	3.89141	3.82329	-0.164886	-0.12567	0.247573	0.379562	-0.00524053	-0.00449502	14.3424	12.5649	0.0199734	-0.0207967	0.89884	0.894692	0.00198068	-0.00174315	2.67981	4.80998	-0.0690727	-0.130362	0.619686	0.347441	-0.00172876	-0.00526459	2.10785	3.39132	0.245313	-0.177037	0.0827269	0.213943	0.00465384	-0.005316	2.96789	5.2061	-0.127703	-0.205566	0.366953	0.143745	-0.00298192	-0.00889172	2.99287	2.68457	0.259607	-0.0467616	0.0780352	0.75495	0.00673692	-0.00114646	2.16339
Aanat																	151.364	-57.3931	0.019072	-0.0177025	0.891123	0.898899	0.0019101	-0.00162573
Aar2	6.53363	4.94972	0.0884217	0.11712	0.537226	0.413076	0.0031089	0.00385441	18.1486	14.7498	0.048521	0.00578641	0.757337	0.970624	0.00410792	0.000384087	3.00839	5.14661	0.17287	0.00844896	0.211283	0.95165	0.00381747	0.000281635	3.62307	4.09945	0.367188	-0.0713889	0.00803653	0.618614	0.00818884	-0.001781	4.49787	7.00317	-0.278582	-0.298133	0.0455184	0.031818	-0.00724157	-0.0131514	4.87209	4.27866	0.106045	-0.165365	0.478052	0.266642	0.00316438	-0.004719	4.34679
Aard																	14.0822	47.8703	-0.111656	-0.158669	0.421501	0.251808	-0.00615759	-0.00969343	49.876	135.209	0.490209	0.4219	0.000260704	0.00204491	0.0678866	0.0579168
Aars	6.57618	3.80304	0.0382098	0.0661626	0.790082	0.644592	0.00133944	0.00208495	17.2944	11.1581	-0.0422487	-0.0985153	0.78793	0.529674	-0.00410404	-0.00782787	3.22481	3.91854	-0.0405928	-0.135106	0.770718	0.330022	-0.00101633	-0.00455217	3.54183	4.15141	-0.0911303	-0.370821	0.524782	0.00738898	-0.00201301	-0.0119829	5.48482	5.74574	0.0540099	-0.0992367	0.703737	0.483964	0.00159283	-0.00431698	6.64264	4.49779	0.0883765	-0.129737	0.554707	0.384759	0.00327793	-0.00460546	4.74616
Aars2	6.19155	4.03066	0.114936	0.160589	0.421903	0.260282	0.00436726	0.00511277	23.9259	17.9093	0.0164281	-0.0372712	0.916726	0.812436	0.00129992	-0.00242391	4.11235	6.11637	-0.110812	-0.176333	0.425042	0.20214	-0.00287604	-0.00641188	6.13908	6.67034	-0.115228	-0.397036	0.420718	0.00391769	-0.00324371	-0.0132136	5.1462	7.17258	-0.34937	-0.336589	0.0111279	0.0146941	-0.0101266	-0.0160364	12.5982	7.63573	0.148719	0.00441426	0.318439	0.976507	0.00806425	0.000180858	5.86357
Aarsd1	22.4068	15.8042	-0.217702	-0.197485	0.124874	0.164808	-0.0104268	-0.00968129	32.262	34.4522	0.0775688	0.0369655	0.621016	0.813947	0.00637843	0.0026546	7.57002	12.937	0.0211094	-0.081321	0.879574	0.558836	0.000628342	-0.00290749	12.5797	16.1247	-0.0911519	-0.309428	0.524683	0.027139	-0.00351101	-0.0134809	20.1796	21.4339	-0.373516	-0.427416	0.00638217	0.00157576	-0.0181191	-0.0240289	35.1076	27.5073	0.490253	0.441112	0.000468571	0.00191219	0.03611	0.0282266	12.1368
Aasdh	23.4685	8.99199	-0.0560098	-0.0418874	0.696255	0.770403	-0.00253739	-0.00179188	28.4645	12.1163	0.0482937	-0.0114831	0.75844	0.94174	0.00320757	-0.000516261	10.5846	8.24207	-0.0659866	-0.172346	0.635449	0.212694	-0.00245131	-0.00598715	11.8797	7.17749	-0.039445	-0.354091	0.783457	0.0107968	-0.00143557	-0.0114054	10.8791	7.29842	-0.176496	-0.311948	0.2107	0.0243658	-0.00648502	-0.0123948	34.5453	12.3877	0.372353	0.30659	0.00995466	0.036078	0.0229047	0.0150213	14.1739
Aasdhppt	6.65089	5.2922	-0.242024	-0.243707	0.0870648	0.0848233	-0.00920146	-0.00845595	19.7286	18.2231	-0.0811432	-0.155369	0.60497	0.319806	-0.00700867	-0.0107325	3.65191	6.29102	-0.357597	-0.362998	0.00793759	0.00698085	-0.00866864	-0.0122045	4.62597	6.33973	-0.31167	-0.536307	0.0259899	4.98314e-05	-0.00854005	-0.0185099	3.97789	7.07708	-0.0616324	-0.176292	0.664254	0.211235	-0.00141617	-0.00732598	9.47567	6.66259	0.249214	0.119822	0.0911645	0.422419	0.012028	0.00414463	3.90157
Aass									74.7637	75.4008	-0.0187039	-0.0479955	0.905239	0.759887	-0.00250117	-0.006225	12.0323	12.225	0.268469	0.238048	0.0496609	0.0830302	0.0131927	0.00965688	75.0587	67.0093	0.63892	0.616986	4.52403e-07	1.4239e-06	0.0793461	0.0693763	110.815	55.6931	0.208069	0.188902	0.138824	0.17986	0.0227923	0.0168825									5.27991
Aatf	9.75665	8.09036	0.189388	0.206869	0.183171	0.145248	0.00724978	0.00799529	14.118	11.6898	0.0278464	-0.0341719	0.859309	0.827787	0.00196075	-0.00176309	4.7527	7.20384	0.031048	-0.0857493	0.823636	0.537552	0.000834212	-0.00270162	5.83194	6.55099	0.262633	-0.0701468	0.0626161	0.624748	0.00783373	-0.00213611	8.02793	8.90342	-0.19709	-0.322363	0.161372	0.01977	-0.00687528	-0.0127851	10.6754	8.12482	0.378375	0.296186	0.00872998	0.0432304	0.0201721	0.0122887	4.96942
Aatk	11.5425	7.16044	-0.122039	-0.123402	0.39359	0.388291	-0.00790471	-0.00715919	36.2593	23.7215	0.0809734	0.0581182	0.605728	0.711241	0.00973535	0.00601152	3.57839	4.53824	0.0375649	-0.0523146	0.787406	0.707144	0.00124674	-0.00228909	12.1658	11.3323	-0.206299	-0.322437	0.146385	0.0210221	-0.0130377	-0.0230076	30.6603	17.3865	-0.216775	-0.289898	0.122684	0.0370999	-0.0116916	-0.0176014	157.453	43.9364	0.502244	0.493049	0.000321665	0.000429758	0.0652475	0.0573641	54.8485
Abat	-105.931	69.921	0.0576974	0.0666832	0.687565	0.641985	0.00653888	0.0072844	30.0172	13.6114	0.00220709	-0.0717088	0.988793	0.6477	0.000163202	-0.00356063	2.58226	3.54656	0.0257401	-0.0819309	0.853421	0.555881	0.000630697	-0.00290514	17.4015	13.8468	0.646768	0.560687	2.93549e-07	1.87558e-05	0.0631162	0.0531463	13.5596	11.1012	0.684228	0.502787	2.24081e-08	0.000145518	0.0410803	0.0351705	5.76931	4.77716	0.512726	0.306296	0.000228861	0.0362656	0.0213066	0.0134232	3.28789
Abca1	11.7641	7.30449	-0.335054	-0.312719	0.0162449	0.0254659	-0.0189006	-0.0181551	17.3907	8.35259	-0.0343254	-0.127638	0.827025	0.414695	-0.002433	-0.00615683	6.65665	5.31772	0.473508	0.353635	0.000298824	0.00871008	0.0135805	0.0100447	4.31092	3.31393	0.149065	-0.183499	0.296487	0.19742	0.00458001	-0.00538984	11.2853	6.88307	-0.0590561	-0.204607	0.677505	0.145663	-0.00228554	-0.00819534	34.2417	20.4664	0.357172	0.284438	0.0137164	0.0526559	0.042982	0.0350986	16.7993
Abca12									67.4282	27.6494	0.037498	0.00580854	0.811316	0.970511	0.00437617	0.000652334	125.141	50.4095	0.0565287	0.0409767	0.684739	0.76861	0.00988259	0.00634676	-278.592	63.4617	0.242326	0.200329	0.0866592	0.158687	0.0335119	0.0235421	53.9634	12.5612	0.41964	0.458929	0.00195599	0.000621717	0.0313113	0.0254015									-218.53
Abca13									16.0893	7.18962	0.0819148	0.0319087	0.60153	0.839037	0.00529735	0.00157352	99.0131	34.2251	0.0959377	0.0830188	0.490136	0.550629	0.0139348	0.010399	-259.936	49.4695	0.242082	0.193664	0.086987	0.173299	0.0322731	0.0223033	570.981	22.5938	0.1659	0.145311	0.239833	0.304022	0.0181409	0.0122311									6.59989
Abca14									56.4667	40.7218	0.048006	0.0166923	0.759836	0.915392	0.00560645	0.00188262									-332.778	671.687	0.353863	0.327638	0.0108513	0.0189259	0.0624942	0.0525243	471.987	64.1923	0.166377	0.147177	0.238463	0.297786	0.0216318	0.0157219
Abca15									54.5907	41.9639	0.0142718	-0.0194073	0.927625	0.901693	0.00158362	-0.00214021									-523.733	452.345	0.246235	0.211216	0.0815432	0.136795	0.0423123	0.0323424	732.776	79.1808	0.165909	0.145523	0.239805	0.30331	0.0228502	0.0169403
Abca16									50.7443	29.9943	0.0688755	0.0318436	0.660763	0.839361	0.00649323	0.00276939									-214.966	220.663	0.314065	0.276531	0.0248072	0.0494885	0.0404622	0.0304924
Abca17									157.964	93.4521	0.079247	0.0571576	0.61346	0.715813	0.0120955	0.00837168	112.271	100.293	0.278111	0.300837	0.0417266	0.0270743	0.0292791	0.0257433
Abca2	7.35007	4.36498	0.297	0.370499	0.0343079	0.00744454	0.014379	0.0151245	23.1237	13.961	0.220784	0.234311	0.154811	0.130445	0.0223499	0.0186261	2.8657	3.86257	0.00575353	-0.0899703	0.967064	0.51764	0.000150036	-0.0033858	4.60276	4.47891	0.0798066	-0.21669	0.577737	0.126681	0.00237364	-0.0075962	5.35315	6.24079	-0.0641746	-0.162359	0.651278	0.250154	-0.00198915	-0.00789896	9.13877	6.18976	0.326211	0.160024	0.0252359	0.282611	0.0149358	0.00705242	6.63723
Abca3	16.7088	6.94297	-0.0524633	-0.047157	0.714644	0.742456	-0.00274377	-0.00199826	23.0558	13.4906	0.0264328	-0.0141505	0.866384	0.928238	0.00261439	-0.00110944	7.09375	7.04231	-0.0888764	-0.149616	0.522764	0.280224	-0.00393008	-0.00746591	8.74251	6.37991	0.233224	0.042674	0.0995458	0.766212	0.0119977	0.00202787	15.3244	10.1444	0.248464	0.120954	0.0757139	0.39302	0.012724	0.00681424	9.79535	6.46032	0.327621	0.168493	0.0245751	0.257575	0.0157633	0.00787994	6.45298
Abca4									149.96	37.7881	-0.0130197	-0.0506099	0.93396	0.747226	-0.0013962	-0.00512004	66.1207	23.1385	0.206194	0.212131	0.134685	0.123573	0.0154971	0.0119613	410.715	32.9976	0.357293	0.281131	0.010056	0.0456726	0.0303566	0.0203867	67.4678	13.702	-0.112049	-0.257604	0.429032	0.0652264	-0.00648373	-0.0123935									81.2514
Abca5	3137.49	18.114	0.0560287	0.0754622	0.696158	0.59868	0.00383519	0.0045807	34.3816	17.242	0.198977	0.156267	0.200837	0.316981	0.0144724	0.0107486	5.47807	4.47524	-0.1206	-0.252813	0.385032	0.0651239	-0.00304033	-0.00657617	28.6699	10.9318	0.328169	0.200647	0.0187224	0.158012	0.0184502	0.00848036	42.883	10.8768	0.290476	0.277074	0.0367067	0.0467495	0.017993	0.0120832	-175.687	38.6714	0.197585	0.124195	0.183101	0.405558	0.0183135	0.0104301	24.1151
Abca6	-211.226	64.8944	0.135409	0.149057	0.343428	0.296514	0.0137927	0.0145382	33.67	23.4928	0.00841745	-0.0462213	0.957277	0.768514	0.000648293	-0.00307554	42.5468	36.7132	0.236716	0.246732	0.084819	0.0720825	0.0223956	0.0188597	17.7951	12.9235	0.471678	0.385574	0.00047582	0.00520251	0.032112	0.0221421	16.3636	10.6502	0.201072	0.0737478	0.152904	0.603354	0.00903361	0.0031238									432.94
Abca7	14.8249	7.544	0.0798761	0.112639	0.577405	0.431301	0.00453913	0.00528464	18.692	13.2462	0.0243445	-0.0125244	0.876856	0.936467	0.00261452	-0.00110931	9.79486	10.082	0.0789992	0.00518492	0.570152	0.970318	0.00380666	0.000270828	14.8503	10.2865	0.242716	0.0844894	0.0861375	0.555545	0.0142846	0.00431477	16.4003	12.4676	0.277925	0.151291	0.0460518	0.284335	0.0153241	0.00941431	10.493	7.79048	0.332933	0.179195	0.0222146	0.228126	0.0171145	0.00923112	17.9579
Abca8a	18.926	10.0586	-0.0634387	-0.0603569	0.658303	0.67395	-0.00427599	-0.00353048	18.9467	9.81054	0.215253	0.249743	0.165678	0.106284	0.0143014	0.0105776	18.0315	15.984	0.720392	0.735588	8.19798e-10	2.36359e-10	0.0532166	0.0496807	12.6764	9.823	0.255029	0.141741	0.0709009	0.32112	0.019652	0.00968214	9.43514	8.09648	0.116093	0.00343353	0.412454	0.980727	0.00610643	0.000196626	36.5755	18.3963	0.529447	0.527649	0.000129897	0.000138249	0.046471	0.0385876	17.5778
Abca8b	-386.264	35.3367	0.33343	0.370219	0.0168025	0.00749306	0.0296719	0.0304174	40.0752	21.538	0.194939	0.179091	0.210317	0.250517	0.0158033	0.0120794	12.8445	8.11687	-0.131394	-0.300218	0.343605	0.0274069	-0.00559408	-0.00912991	25.2364	16.865	0.599511	0.507551	3.34129e-06	0.000143811	0.045906	0.0359361	15.6488	7.61785	0.174011	0.0164739	0.217299	0.90772	0.00643178	0.000521974	-109.783	198.299	0.357424	0.323461	0.0136451	0.0265672	0.0490223	0.041139	203.699
Abca9	67.4957	17.1654	0.077552	0.0961492	0.588564	0.502107	0.00541988	0.0061654	18.1246	7.35104	0.0541771	-0.00675891	0.730058	0.965689	0.00348528	-0.000238548	15.7322	10.148	0.137797	0.0821304	0.320393	0.554916	0.00652639	0.00299056	10.2577	6.79871	0.481956	0.354052	0.000342255	0.010806	0.0255414	0.0155716	10.0084	6.89986	0.0406073	-0.11559	0.775014	0.414494	0.00147239	-0.00443741	81.756	21.1177	0.389567	0.336151	0.00679628	0.0208795	0.0287967	0.0209133	18.8539
Abcb10	5.73351	3.60028	-0.0862295	-0.0834944	0.547402	0.560226	-0.00311404	-0.00236853	15.4317	13.7119	-0.0888647	-0.131365	0.570934	0.401088	-0.0110455	-0.0147693	3.48015	6.43636	0.0264503	-0.0799145	0.849423	0.565678	0.000579565	-0.00295627	5.32849	5.96364	-0.0677222	-0.33473	0.636794	0.0163548	-0.00209855	-0.0120684	4.06414	6.02581	-0.29151	-0.304948	0.0360122	0.0279347	-0.00795638	-0.0138662	3.93978	4.38686	0.0567386	-0.174559	0.704828	0.240583	0.00163039	-0.006253	4.34544
Abcb11									54.4441	42.9274	0.0486618	0.0150579	0.756654	0.92365	0.00531913	0.0015953									-451.85	458.731	0.248444	0.19987	0.078758	0.159663	0.0325273	0.0225575	1334.26	105.112	0.199409	0.1891	0.156401	0.179395	0.0310205	0.0251107
Abcb1a	97.3084	21.882	0.228977	0.275204	0.106042	0.0506363	0.0155837	0.0163292	35.2119	24.627	0.23921	0.210096	0.122368	0.176297	0.017321	0.0135972	8.78333	9.44519	0.11122	0.0180461	0.423328	0.896947	0.00425954	0.000723706	9.71078	8.06486	0.347739	0.0918195	0.0124067	0.521638	0.0133807	0.00341091	12.4082	8.8308	0.23582	0.0895759	0.0923725	0.527707	0.00946357	0.00355377	11.91	11.0959	0.228617	0.14486	0.122185	0.331296	0.024434	0.0165506	47.2495
Abcb1b	35.7653	10.3642	0.224641	0.291776	0.113008	0.037757	0.0118355	0.012581	24.7773	12.1455	0.251335	0.265854	0.104	0.0848687	0.0160427	0.0123188	36.8251	22.0343	0.232559	0.248747	0.0905977	0.0697137	0.0184171	0.0148813	14.9231	9.14978	0.661666	0.592523	1.24722e-07	4.63436e-06	0.0376207	0.0276508	22.5816	8.577	0.318705	0.277763	0.0212925	0.046184	0.0157004	0.0097906	-130.793	111.934	0.466908	0.440855	0.000938073	0.00192529	0.0597199	0.0518365	48.4355
Abcb4	3485.51	22.1076	0.231094	0.269026	0.102764	0.0562674	0.017074	0.0178195	17.6712	11.3112	0.131723	0.112693	0.399792	0.471833	0.0125243	0.00880049	20.1785	10.7564	0.238802	0.24595	0.0820301	0.0730182	0.0128496	0.00931381	95.418	29.8205	0.521622	0.476833	8.66442e-05	0.000403866	0.0451268	0.035157	7.28632	7.20161	0.419696	0.158014	0.00195299	0.263224	0.0134239	0.00751409	-84.2567	323.305	0.36434	0.325842	0.0118114	0.0254111	0.0571413	0.0492579	-463.252
Abcb5									43.7605	39.7153	0.124885	0.0936125	0.424913	0.550452	0.0136737	0.00994984																	181.034	67.4976	0.150817	0.127747	0.285863	0.366788	0.0194724	0.0135626
Abcb6	24.098	12.5708	-0.473398	-0.472207	0.000450614	0.00046794	-0.0257788	-0.0250332	38.2659	27.5376	0.0412023	0.00638684	0.793066	0.967577	0.00429383	0.000569999	14.8797	18.3124	-0.164941	-0.221464	0.233306	0.107529	-0.0064731	-0.0100089	15.4474	13.5316	0.0416502	-0.195614	0.771668	0.168926	0.00164348	-0.00832636	18.1267	14.0785	-0.1621	-0.257564	0.25092	0.0652694	-0.0065942	-0.012504	18.7901	11.8548	0.333149	0.18224	0.0221226	0.220187	0.016214	0.00833057	9.97068
Abcb7	19.672	10.8999	-0.281795	-0.292623	0.045142	0.0371792	-0.0178743	-0.0171288	27.7608	18.5615	0.0718206	0.04473	0.647187	0.775787	0.00738228	0.00365845	8.75073	10.1023	-0.358829	-0.384883	0.00770981	0.00405655	-0.0145122	-0.018048	17.9373	13.8404	0.0473155	-0.150569	0.74162	0.291587	0.00241988	-0.00754997	12.266	10.081	0.0431844	-0.0659352	0.761144	0.642352	0.00221086	-0.00369894	8.34184	6.7465	0.312009	0.122131	0.0327577	0.413466	0.0132987	0.00541529	8.02322
Abcb8	3.70264	2.72437	0.0272725	0.0578336	0.849331	0.686865	0.000837849	0.00158336	19.6486	14.0306	0.0759237	0.0463068	0.628461	0.768098	0.00695889	0.00323506	3.00475	5.20365	0.0387014	-0.0783311	0.781131	0.573427	0.000818869	-0.00271696	3.02773	4.30611	-0.488666	-0.642703	0.000274456	3.67828e-07	-0.0101984	-0.0201682	3.51709	5.35161	-0.11806	-0.198359	0.404523	0.158638	-0.00311452	-0.00902433	4.41166	3.27668	0.0538723	-0.221092	0.719112	0.135316	0.00175925	-0.00612413	3.24357
Abcb9	8.36326	6.40796	-0.0587875	-0.0377639	0.681972	0.792477	-0.00244562	-0.00170011	23.3314	15.9794	0.0171541	-0.0349117	0.913059	0.824117	0.00141336	-0.00231047	3.36848	5.37391	-0.281051	-0.275579	0.0395263	0.0437018	-0.00646319	-0.00999903	6.71854	6.84433	0.15062	-0.124449	0.291421	0.384245	0.00509837	-0.00487147	9.24819	9.42709	0.121189	-0.0334938	0.392095	0.813648	0.00429127	-0.00161853	7.87872	7.52753	0.00201759	-0.151143	0.989261	0.310525	8.72446e-05	-0.00779614	12.1481
Abcc1	13.4805	5.41824	-0.0352047	-0.0197602	0.806259	0.890532	-0.00149163	-0.000746118	17.6776	6.70253	0.199656	0.228329	0.199274	0.140841	0.0129638	0.00923996	9.16586	4.17764	0.239094	0.208686	0.081646	0.129932	0.00834701	0.00481118	5.4852	4.23238	0.414966	0.0619583	0.00246354	0.665802	0.0119736	0.00200375	8.22068	4.76869	0.161712	-0.0271472	0.252073	0.848496	0.00502469	-0.000885114	39.8029	10.0499	0.391661	0.336669	0.00647914	0.0206711	0.0239747	0.0160913	14.4291
Abcc10	11.7768	6.4941	-0.274479	-0.276939	0.0512722	0.0491396	-0.0114638	-0.0107183	34.5058	16.4968	0.104509	0.0703822	0.504808	0.653804	0.00714994	0.0034261	9.75503	10.021	-0.136886	-0.211433	0.323633	0.124842	-0.00498312	-0.00851895	10.7365	7.99537	0.119652	-0.177326	0.402979	0.213184	0.00404666	-0.00592318	17.8739	11.4193	0.250678	0.0887481	0.073059	0.531544	0.00980633	0.00389653	5.90569	4.43684	0.13692	-0.136043	0.35876	0.361874	0.00391181	-0.00397158	9.83943
Abcc12									791.26	138.592	-0.107367	-0.132423	0.493159	0.397272	-0.016655	-0.0203788	44.9836	31.5535	0.468274	0.516088	0.000355733	6.48579e-05	0.0323909	0.028855	-88.6511	-239.239	0.282073	0.234693	0.0449211	0.0973703	0.0359841	0.0260143
Abcc2									91.2932	39.206	0.126814	0.101027	0.417738	0.519181	0.0138194	0.0100956	394.474	130.616	0.112329	0.103507	0.418689	0.456377	0.0183715	0.0148357									-146.421	153.553	0.210955	0.201826	0.133306	0.151339	0.0345794	0.0286696	8.37399	7.70285	0.0988791	-0.00855533	0.508452	0.954486	0.0071709	-0.000712484	7.09531
Abcc3									28.8428	20.0528	0.189089	0.188066	0.224598	0.227161	0.0199011	0.0161773	36.6333	32.5767	0.366975	0.361112	0.00634212	0.00730277	0.0241356	0.0205998	11.7932	10.1787	0.463798	0.300357	0.000608346	0.0322322	0.0275294	0.0175595	71.309	26.1456	0.0405055	-0.0556931	0.775563	0.694947	0.00264373	-0.00326607	5.68112	5.67771	0.124109	-0.0370248	0.405883	0.804847	0.00584674	-0.00203665	84.1727
Abcc4	8.9579	5.9575	0.0116667	0.0310278	0.93524	0.828877	0.000419888	0.0011654	16.747	10.7272	0.0391271	-0.0102702	0.803277	0.947885	0.00310832	-0.000615508	7.8946	7.33713	0.318409	0.220395	0.0189506	0.109281	0.0106465	0.00711069	9.69098	6.89104	0.312624	0.0581303	0.0255129	0.685342	0.0119075	0.00193764	6.06621	6.65741	0.218661	-0.0195767	0.119383	0.890437	0.0051994	-0.000710399	34.1157	15.1679	0.545393	0.533507	7.35739e-05	0.000112698	0.037008	0.0291246	14.6229
Abcc5	16.1509	6.86504	0.0971888	0.139832	0.497474	0.327747	0.00600582	0.00675134	17.0188	9.78685	0.114109	0.0933359	0.466247	0.551636	0.0100541	0.00633026	6.20606	5.44546	-0.221976	-0.296113	0.106698	0.0296994	-0.0104558	-0.0139916	8.76393	6.48829	-0.231241	-0.440996	0.10254	0.00119936	-0.0117843	-0.0217542	8.88434	7.01023	-0.0599637	-0.16686	0.672826	0.237083	-0.0025521	-0.0084619	16.3395	7.95113	0.538654	0.472835	9.388e-05	0.000790148	0.0306376	0.0227542	9.14712
Abcc6																	62.4499	55.0906	0.063928	0.0212095	0.646054	0.879008	0.0049378	0.00140196																	8.57416	7.86268	0.135714	-0.0206821	0.363048	0.890251	0.00671652	-0.00116687	12.1305
Abcc8	-192.042	69.2437	0.173276	0.177823	0.223991	0.211883	0.0238075	0.024553	259.894	65.9339	0.128454	0.102923	0.411693	0.511329	0.0154146	0.0116907	6.01067	5.25396	-0.132837	-0.247269	0.338286	0.071445	-0.0044224	-0.00795823	-90.4898	-329.441	0.335053	0.29147	0.0162453	0.0379674	0.0535135	0.0435437	6.51243	5.8899	-0.176508	-0.278381	0.210667	0.0456813	-0.00636102	-0.0122708	-247.228	42.154	0.293206	0.213822	0.0454796	0.148972	0.0234589	0.0155755
Abcc9	11.6102	5.66114	-0.419675	-0.477418	0.00217172	0.000396349	-0.0184926	-0.0177471	21.4959	11.909	-0.0146774	-0.07749	0.925574	0.621372	-0.00130079	-0.00502463	19.9754	10.935	0.130342	0.0939637	0.347514	0.499148	0.00694218	0.00340635	10.5934	7.74453	-0.272625	-0.503129	0.052929	0.000167876	-0.0132579	-0.0232277	4.08846	5.04072	-0.0356046	-0.148878	0.802134	0.292175	-0.001059	-0.0069688	39.5066	16.5752	0.484122	0.485563	0.000564979	0.000540848	0.0430134	0.03513	16.5926
Abcd1	5.95636	4.22721	0.0968935	0.132311	0.498788	0.354685	0.00361476	0.00436027	17.5978	14.3826	-0.0247874	-0.071576	0.874633	0.64831	-0.00266438	-0.00638821	6.81464	9.64932	0.0503763	-0.0492291	0.717534	0.723707	0.00160228	-0.00193355	5.28475	5.10105	0.375458	0.0779064	0.00662871	0.586857	0.0125583	0.00258842	4.38761	6.04053	0.0749099	-0.093302	0.597642	0.510607	0.00201445	-0.00389535	5.24595	6.00338	-0.0934644	-0.201841	0.532053	0.173659	-0.00468103	-0.0125644	5.98626
Abcd2	13.858	9.95371	0.783987	0.834517	1.02088e-11	2.78806e-14	0.0729802	0.0737257	18.5792	13.511	0.0600967	0.0225849	0.701857	0.885695	0.00542492	0.00170109	4.6742	5.89996	-0.289054	-0.32379	0.0340156	0.016921	-0.00839229	-0.0119281	3.37916	3.51366	0.0809361	-0.187769	0.572347	0.187013	0.00277024	-0.00719961	15.8012	9.42394	0.0693958	-0.0941582	0.624951	0.506718	0.00257821	-0.00333159									261.377
Abcd3	4.48943	3.66725	-0.12085	-0.100167	0.398251	0.484326	-0.0049738	-0.00422829	16.3662	9.49499	0.0529663	0.00532364	0.735871	0.972972	0.00400267	0.000278838	2.59857	4.33432	-0.271709	-0.268745	0.0468678	0.0494178	-0.00505002	-0.00858585	3.34873	4.19243	-0.386933	-0.572538	0.00503304	1.13373e-05	-0.00899011	-0.01896	3.12025	4.47706	-0.1769	-0.250117	0.209641	0.0737247	-0.00401762	-0.00992743	3.50838	4.04215	0.0140017	-0.160298	0.925577	0.281776	0.000479343	-0.00740404	3.42703
Abcd4	7.41735	3.83771	-0.0137369	0.00960589	0.92378	0.946661	-0.000474603	0.000270909	36.9761	13.3703	0.12385	0.133624	0.42879	0.392967	0.00974588	0.00602205	6.6634	7.6071	-0.162647	-0.227774	0.239961	0.0976248	-0.00426119	-0.00779702	8.01916	5.68202	0.239348	-0.0710388	0.0907231	0.62034	0.00780605	-0.00216379	14.3219	8.82175	-0.076625	-0.222101	0.589257	0.113536	-0.00270587	-0.00861567	6.8544	5.21158	0.109228	-0.137914	0.464868	0.355248	0.00327693	-0.00460646	6.94089
Abce1	9.96277	6.63774	-0.309786	-0.32444	0.0269524	0.020193	-0.0179694	-0.0172239	15.5628	11.4025	-0.0788214	-0.143579	0.615373	0.358337	-0.00754098	-0.0112648	3.03528	4.35267	-0.326199	-0.334942	0.0160744	0.013298	-0.00732964	-0.0108655	3.75131	3.91258	0.123775	-0.236618	0.386847	0.0945773	0.00308265	-0.0068872	3.72925	4.83995	-0.167131	-0.264276	0.236313	0.05833	-0.00388968	-0.00979949	8.26821	5.16133	0.383383	0.302905	0.00781271	0.0384904	0.0201636	0.0122802	4.08909
Abcf1	5.61943	4.78948	-0.122755	-0.0867324	0.390801	0.545059	-0.0035692	-0.00282369	16.7842	13.5169	-0.0231265	-0.0785174	0.882973	0.616741	-0.00203279	-0.00575662	4.0318	6.92934	-0.176924	-0.199832	0.200608	0.147404	-0.00450059	-0.00803643	3.4698	5.06793	-0.0472422	-0.347802	0.742007	0.0123897	-0.000973238	-0.0109431	4.448	6.45372	-0.13624	-0.220578	0.335518	0.116097	-0.00345973	-0.00936953	4.61606	3.73203	0.317798	0.0696207	0.0294935	0.641926	0.00986967	0.00198628	4.24446
Abcf2	5.08184	4.42495	0.0366137	0.060494	0.798663	0.673251	0.00129925	0.00204476	13.3336	11.6795	0.0129669	-0.0346219	0.934227	0.825554	0.0012085	-0.00251534	2.14141	4.29607	-0.243247	-0.251601	0.0763293	0.0664666	-0.00477556	-0.0083114	2.58902	3.80808	0.106716	-0.306208	0.456063	0.028864	0.00205618	-0.00791366	3.49621	5.87298	-0.0944871	-0.189607	0.505228	0.178211	-0.0025335	-0.0084433	6.11711	4.20476	0.380718	0.296329	0.00828996	0.0431242	0.0167023	0.00881894	3.34446
Abcf3	4.89935	3.50744	-0.0526053	-0.0330978	0.713904	0.81765	-0.00161825	-0.000872733	14.8431	12.3113	0.0291044	-0.0209514	0.853021	0.893914	0.0023628	-0.00136104	2.92469	4.99366	0.15821	0.00549462	0.253199	0.968546	0.0037327	0.000196862	2.68317	3.56568	-0.0170965	-0.4284	0.905216	0.00171116	-0.000313256	-0.0102831	4.03043	6.41471	-0.0872189	-0.17998	0.538668	0.201686	-0.00233879	-0.00824859	4.16694	3.41302	0.271218	-0.00505231	0.0651772	0.973113	0.00775616	-0.000127226	3.48763
Abcg1	31.4033	14.2602	-0.171669	-0.162783	0.228383	0.253739	-0.0116033	-0.0108578	26.8328	17.5702	0.266033	0.273994	0.0846511	0.0754119	0.0273851	0.0236612	4.68526	5.7764	0.101378	-0.0100161	0.465744	0.942695	0.0031312	-0.000404636	14.1316	10.8161	0.371796	0.240282	0.00722311	0.0894333	0.0255649	0.0155951	33.9146	16.7883	0.182071	0.0708565	0.19641	0.617666	0.00992373	0.00401393	678.967	40.1571	0.306464	0.25318	0.0361585	0.0859648	0.028159	0.0202757	20.7926
Abcg2	15.9205	6.63564	-0.128523	-0.12984	0.368748	0.363822	-0.00534068	-0.00459517	17.3298	11.66	-0.0203605	-0.0743648	0.896889	0.63555	-0.00179663	-0.00552047	6.59013	6.10691	-0.104532	-0.218708	0.451905	0.112091	-0.0029113	-0.00644713	6.85626	6.39605	-0.343187	-0.554708	0.0136834	2.40048e-05	-0.0103758	-0.0203456	7.47097	6.37413	0.261721	0.0453232	0.0608985	0.749689	0.00760008	0.00169027	5.18078	5.23393	-0.181313	-0.297026	0.222584	0.0426131	-0.00713177	-0.0150152	3.09865
Abcg3									20.7032	16.6558	0.188943	0.194819	0.224962	0.210603	0.0180969	0.014373	48.1856	69.4077	0.182878	0.183255	0.185628	0.184707	0.0177362	0.0142003	24.665	21.7847	0.472809	0.402902	0.000459107	0.00337527	0.0367256	0.0267558	102.836	53.991	0.22481	0.20993	0.109088	0.135246	0.0224325	0.0165227	19.935	17.2746	0.265103	0.165873	0.0717208	0.265155	0.0204183	0.0125349	79.4456
Abcg4									22.4771	17.9242	-0.103964	-0.157875	0.507043	0.311963	-0.0111792	-0.014903	2.84586	4.37682	-0.22253	-0.258444	0.105804	0.0591708	-0.00479268	-0.00832851	31.7361	27.8434	-0.457373	-0.546873	0.000740094	3.29343e-05	-0.0302705	-0.0402404	-142.631	312.073	0.0190462	-0.0343908	0.893389	0.80875	0.00224921	-0.00366059
Abcg5									138.545	404.231	-0.0914126	-0.122173	0.559899	0.435117	-0.0127544	-0.0164783																									5.35927	6.57379	-0.355114	-0.402646	0.0143094	0.00501733	-0.0201224	-0.0280058
Abcg8																																									5.97267	6.91836	-0.296089	-0.351742	0.0433016	0.0153285	-0.0169965	-0.0248799
Abhd1	74.9398	129.634	0.0919885	0.0969083	0.520869	0.498722	0.00844039	0.0091859									122.578	-76.7804	-0.219996	-0.245379	0.109941	0.0737082	-0.0271398	-0.0306756																	16.4798	30.9763	0.0165621	-0.110251	0.912018	0.460672	0.000910629	-0.00697276	41.5705
Abhd10	10.0256	7.56875	0.168441	0.186394	0.237382	0.190322	0.00673228	0.00747779	16.6962	13.3444	0.0770603	0.0307331	0.623314	0.844893	0.00539469	0.00167086	4.24697	6.2966	0.146733	0.0112624	0.289701	0.935579	0.0039245	0.000388667	6.59078	7.42558	0.177504	-0.138401	0.212716	0.332771	0.00532127	-0.00464857	5.4998	6.65956	0.114372	-0.0868073	0.419463	0.540593	0.00290914	-0.00300066	10.1939	6.40226	0.420012	0.332691	0.00329083	0.0223178	0.0182029	0.0103196	6.73359
Abhd11	4.68278	4.72463	-0.0470282	-0.0245553	0.743136	0.864194	-0.00166264	-0.00091713	20.2963	22.1276	0.025932	-0.0153305	0.868893	0.922272	0.00248436	-0.00123947	5.2358	11.3149	-0.21858	-0.21956	0.112307	0.110665	-0.00679924	-0.0103351	3.87106	7.17436	-0.31288	-0.440172	0.0253863	0.0012281	-0.00805605	-0.0180259	5.10358	8.25959	-0.379208	-0.364358	0.00556435	0.00791859	-0.0127356	-0.0186454	5.3992	4.38596	0.389466	0.240412	0.0068118	0.103572	0.0149496	0.00706622	3.15245
Abhd11os																	40.2102	-100.11	0.117926	0.0785566	0.395732	0.572321	0.0126225	0.00908668																	4.5702	8.69426	-0.383859	-0.413633	0.00773004	0.00385207	-0.016151	-0.0240343	29.566
Abhd12	4.02282	4.01324	-0.0906274	-0.0588123	0.527081	0.681845	-0.00266642	-0.00192091	15.2995	13.6251	0.197479	0.198883	0.204319	0.201055	0.020283	0.0165591	1.7413	3.92084	-0.0931452	-0.141104	0.502911	0.308804	-0.00176688	-0.00530272	3.38021	3.90357	0.674688	0.311395	5.6699e-08	0.0261284	0.0200634	0.0100936	3.69623	6.05992	-0.130226	-0.214008	0.357483	0.12765	-0.00342648	-0.00933628	4.22795	5.54925	0.0175802	-0.141257	0.906632	0.343591	0.000677183	-0.0072062	3.69508
Abhd12b									194.527	187.266	-0.00039871	-0.0287017	0.997975	0.855033	-5.54595e-05	-0.00377929	37.0967	49.9351	0.0547004	-0.00104386	0.694428	0.994023	0.00348327	-5.25659e-05
Abhd13	11.045	6.72493	-0.297117	-0.324005	0.0342337	0.0203707	-0.014637	-0.0138915	20.9996	13.9802	0.0247142	-0.0219814	0.875	0.88873	0.0022471	-0.00147674	6.34383	7.67748	-0.257883	-0.297931	0.0597427	0.028665	-0.0100983	-0.0136341	7.92612	6.91363	-0.148378	-0.403446	0.298745	0.00332851	-0.00614837	-0.0161182	9.15526	8.01077	0.117856	-0.0266754	0.405343	0.851099	0.00472558	-0.00118423	5.45092	4.86335	0.276499	0.0457978	0.0599173	0.759849	0.00956972	0.00168633	6.93667
Abhd14a	8.97982	7.91957	0.0389189	0.0616872	0.786276	0.667179	0.00149987	0.00224538	22.8641	23.9468	-0.0518796	-0.128173	0.741101	0.412727	-0.00450485	-0.00822868	3.80814	8.89076	-0.252119	-0.233165	0.0658903	0.0897362	-0.00632712	-0.00986295	4.566	7.32657	0.193699	-0.136351	0.173219	0.340049	0.00514715	-0.00482269	6.91603	9.83804	-0.0557131	-0.173861	0.694843	0.217699	-0.00193505	-0.00784486	8.692	7.5025	0.0979287	-0.0667062	0.512555	0.655961	0.00510986	-0.00277353	3.06354
Abhd14b	6.49881	5.3401	0.229953	0.27046	0.104522	0.0549172	0.00902002	0.00976554	26.0114	26.3174	0.170356	0.159202	0.274749	0.307863	0.0144886	0.0107648	4.98371	7.87961	0.361533	0.20164	0.00722973	0.143704	0.0109818	0.007446	2.8666	4.0942	-0.138312	-0.460159	0.333084	0.000680117	-0.00295305	-0.0129229	5.22904	7.69429	0.0178529	-0.145288	0.900033	0.3041	0.000457017	-0.00545279	4.76007	4.68883	0.40036	0.183246	0.00529527	0.217607	0.0143226	0.00643926	1.95591
Abhd15	7.65953	6.77587	-0.299084	-0.284653	0.0330065	0.0429156	-0.016364	-0.0156185	20.8154	20.1582	-0.0818758	-0.141293	0.601703	0.366119	-0.00756027	-0.0112841	39.4978	104.911	-0.111626	-0.156217	0.421629	0.259305	-0.00840956	-0.0119454	4.76656	6.15197	-0.53142	-0.644947	6.0074e-05	3.24896e-07	-0.0201923	-0.0301622	29.5898	27.0192	0.0850508	-0.0210195	0.548847	0.882417	0.00472481	-0.001185	18.8038	17.7489	0.325538	0.207474	0.0255561	0.161708	0.0217995	0.0139161	24.4983
Abhd16a	4.50769	4.0275	-0.0530521	-0.0303643	0.711579	0.832483	-0.00179113	-0.00104561	13.2119	11.8335	0.0823885	0.0509799	0.599422	0.74544	0.00785341	0.00412958	2.59273	4.68216	-0.0655405	-0.133215	0.637741	0.336898	-0.00157437	-0.0051102	1.96662	3.24182	-0.177281	-0.474555	0.2133	0.000434354	-0.00304239	-0.0130122	3.60899	5.64373	-0.176349	-0.241929	0.211086	0.0839997	-0.00478535	-0.0106952	3.35562	3.60062	0.286361	0.000345472	0.0510084	0.998161	0.00789401	1.06274e-05	3.2008
Abhd16b
Abhd17a	3.78326	3.9486	0.186548	0.205449	0.189949	0.148091	0.00635602	0.00710153	13.298	14.3946	0.00730686	-0.0321076	0.962909	0.838047	0.00078073	-0.0029431	3.35419	6.44161	-0.148726	-0.166449	0.283127	0.229001	-0.00530799	-0.00884382	2.17541	4.7584	-0.100496	-0.329154	0.482885	0.0183494	-0.00200488	-0.0119747	3.58018	6.82798	-0.175772	-0.22908	0.212608	0.10235	-0.005018	-0.0109278	2.34241	3.56233	-0.087416	-0.286978	0.559034	0.050489	-0.00224147	-0.0101249	2.92611
Abhd17b	5.09823	4.08581	-0.165091	-0.157482	0.246979	0.269736	-0.00543603	-0.00469052	16.0333	14.8646	0.0688686	0.0347936	0.660795	0.824702	0.00642486	0.00270102	4.10303	7.15841	-0.223717	-0.234274	0.103908	0.088177	-0.00691689	-0.0104527	5.17075	5.74121	0.336365	0.0522778	0.0158062	0.71561	0.0118722	0.00190236	7.38993	9.39241	-0.219092	-0.299172	0.118638	0.0311989	-0.00770327	-0.0136131	3.77972	4.03189	-0.156856	-0.409478	0.292375	0.00426139	-0.00433486	-0.0122182	4.94231
Abhd17c	6.1611	4.56245	0.0699143	0.0947516	0.625899	0.508371	0.00280625	0.00355176	18.4399	14.2068	0.0828768	0.0564963	0.597253	0.718965	0.00828938	0.00456555	4.79315	7.51533	0.00192407	-0.0754861	0.988983	0.587472	6.04388e-05	-0.00347539	4.29063	5.37179	0.197788	-0.147089	0.164147	0.303012	0.00502145	-0.0049484	4.82898	5.99376	-0.155876	-0.249301	0.269821	0.0747016	-0.00455825	-0.0104681	2.99892	3.85153	-0.423914	-0.49272	0.00298416	0.000434159	-0.0121545	-0.0200379	3.99433
Abhd18	-269.658	17.6127	-0.0659769	-0.0547517	0.645523	0.702759	-0.003716	-0.00297049									124.5	40.7043	-0.22156	-0.251934	0.107373	0.0660954	-0.0134718	-0.0170077	-94.0159	57.6796	0.0958447	-0.0500136	0.503468	0.72744	0.00674306	-0.00322679	11.251	8.9299	-0.196226	-0.253554	0.163255	0.0697205	-0.00751226	-0.0134221	35.6894	14.1529	-0.107781	-0.230605	0.470839	0.118883	-0.00521092	-0.0130943	58.2835
Abhd2	45.6509	11.7332	-0.0371825	-0.022756	0.795602	0.874061	-0.00189496	-0.00114945	24.6383	13.3426	0.0676873	0.0320945	0.666271	0.838112	0.00600991	0.00228607	4.2891	6.06597	-0.0940843	-0.145012	0.498595	0.295458	-0.00219994	-0.00573578	8.47736	6.37952	0.284621	0.0244289	0.0429402	0.864886	0.0109532	0.000983401	13.4419	8.83365	-0.0197985	-0.145447	0.889204	0.303565	-0.000729784	-0.00663959	7.5017	6.97554	-0.110138	-0.193248	0.461133	0.193096	-0.00703502	-0.0149184	5.54704
Abhd3	24.54	19.7852	0.579235	0.621075	8.45608e-06	1.15757e-06	0.0384076	0.0391531	49.4436	96.8001	0.0903	0.0523332	0.564705	0.738917	0.00767631	0.00395248	2.59677	5.44509	-0.118982	-0.162219	0.391484	0.241218	-0.0026869	-0.00622273	6.4972	9.41691	-0.347281	-0.522447	0.0125303	8.40501e-05	-0.0118634	-0.0218332	14.7213	19.2601	0.333969	0.176493	0.0155348	0.210708	0.0163167	0.0104069	5.71588	7.47485	-0.632094	-0.618668	1.88376e-06	3.57261e-06	-0.0326754	-0.0405588	4.47229
Abhd4	3.40853	3.1443	0.0743953	0.0965651	0.603874	0.500251	0.00209176	0.00283728	16.8813	15.0957	0.00818447	-0.0328073	0.958458	0.834567	0.000848423	-0.00287541	2.9097	5.27142	0.205805	0.0378531	0.135438	0.785814	0.00499263	0.0014568	2.9293	3.77842	0.1979	-0.184499	0.163904	0.194947	0.00460074	-0.0053691	4.04722	5.71586	-0.249937	-0.308191	0.073939	0.0262305	-0.00714105	-0.0130509	4.23965	5.37296	-0.190598	-0.304373	0.19939	0.037514	-0.00711646	-0.0149998	3.48056
Abhd5	6.11354	5.23731	-0.237973	-0.19653	0.0926484	0.166901	-0.0101536	-0.00940808	18.1186	12.6879	-0.0228574	-0.0792	0.884325	0.613672	-0.00210411	-0.00582795	6.14142	7.48124	-0.0124505	-0.111384	0.9288	0.422641	-0.000354243	-0.00389008	4.17713	5.12863	-0.67663	-0.732495	5.02401e-08	9.99625e-10	-0.0213133	-0.0312831	4.08209	5.3759	-0.0914922	-0.211692	0.518878	0.131924	-0.00210508	-0.00801488	6.59034	6.28694	-0.0848271	-0.273013	0.570776	0.0633493	-0.00258177	-0.0104652	4.47976
Abhd6	6.15722	6.15983	-0.291957	-0.261517	0.0376326	0.0637803	-0.0133707	-0.0126251	28.8071	35.2403	-0.0383132	-0.109992	0.807291	0.482587	-0.0030609	-0.00678474	2.76688	5.57088	-0.304805	-0.287841	0.0250219	0.0348073	-0.00701247	-0.0105483	5.4811	7.61771	-0.378622	-0.559133	0.00614987	2.00077e-05	-0.0131206	-0.0230905	7.418	11.104	0.0842597	-0.0632226	0.552584	0.656126	0.00289638	-0.00301343	5.66505	7.29649	0.0543767	-0.0748226	0.716591	0.617183	0.00291495	-0.00496844	6.7028
Abhd8	22.1261	13.4406	-0.0449797	-0.0344191	0.753966	0.810501	-0.00267555	-0.00193004	21.9542	17.6801	-0.051921	-0.112076	0.740902	0.474279	-0.00491196	-0.00863579	2.45857	4.22484	-0.20084	-0.210823	0.145333	0.12596	-0.0051147	-0.00865054	9.02822	8.68035	0.187794	-0.0737415	0.186953	0.607066	0.00717361	-0.00279624	5.67857	7.06077	-0.236404	-0.301794	0.0915451	0.0296796	-0.00739869	-0.0133085	25.8993	16.7767	0.438655	0.416024	0.00204062	0.00363256	0.0343916	0.0265082	7.79998
Abi1	5.77109	4.24079	-0.302025	-0.29843	0.0312401	0.0334104	-0.00948083	-0.00873531	14.0543	11.7382	-0.0106205	-0.0594867	0.94611	0.704746	-0.00100703	-0.00473086	1.91733	4.23296	-0.431335	-0.32104	0.00112853	0.0179339	-0.00690645	-0.0104423	3.82354	3.5536	0.380271	0.0164851	0.00591255	0.908591	0.0103956	0.000425722	5.81469	5.64371	-0.112047	-0.276883	0.429038	0.0469076	-0.00342864	-0.00933844	2.84356	3.23399	0.142877	-0.165515	0.338028	0.266202	0.00322865	-0.00465474	2.7542
Abi2	36.2217	12.3506	-0.00811497	0.00338237	0.95493	0.981207	-0.000550074	0.000195439	18.2944	9.32256	0.0611988	0.0164488	0.696649	0.916622	0.004556	0.000832165	4.32178	4.84233	-0.199702	-0.250925	0.147675	0.0672248	-0.00662872	-0.0101646	11.725	7.17225	0.0951273	-0.12968	0.506683	0.364417	0.00472388	-0.00524597	9.77338	6.22908	0.359435	0.191561	0.00887025	0.173696	0.0126487	0.00673892	23.4128	11.0341	0.347344	0.231542	0.0167496	0.117351	0.0195169	0.0116335	11.445
Abi3	25.841	12.8726	-0.0911135	-0.0951784	0.524859	0.506454	-0.00542647	-0.00468095	31.7098	26.6259	0.206481	0.194992	0.184026	0.210191	0.020012	0.0162882	43.1274	77.8872	0.194034	0.132399	0.159757	0.339894	0.0120246	0.00848873	21.4695	20.1134	0.0436845	-0.144584	0.760838	0.31141	0.00231202	-0.00765783	15.3181	15.5469	-0.0750866	-0.178154	0.596776	0.206377	-0.00269025	-0.00860006	22.0199	15.3915	0.323993	0.221515	0.0263051	0.134549	0.0203525	0.0124691	27.6082
Abi3bp	59.7192	18.4149	0.196161	0.225508	0.167715	0.111589	0.0152741	0.0160196	13.759	7.1896	0.0424069	-0.0354732	0.787154	0.821334	0.00239475	-0.00132908	11.2625	7.05436	-0.0730061	-0.22057	0.59984	0.108993	-0.00321194	-0.00674777	6.47064	5.03311	-0.0022354	-0.300915	0.987579	0.0318977	-7.91591e-05	-0.010049	12.4988	5.10777	0.0718702	-0.125913	0.612631	0.373764	0.00277103	-0.00313877	31.9026	13.5999	0.202913	0.118878	0.171338	0.426107	0.0145782	0.00669477	21.8312
Abl1	15.9136	6.15308	-0.140055	-0.144882	0.326969	0.310402	-0.00622567	-0.00548015	24.3621	12.2027	0.0135589	-0.0365327	0.931231	0.816088	0.00122473	-0.0024991	7.06561	7.2784	-0.165678	-0.210605	0.231194	0.12636	-0.00530722	-0.00884305	8.44253	5.33296	0.173431	-0.0815861	0.223569	0.569256	0.00703892	-0.00293092	9.13023	6.7476	0.104642	-0.0519223	0.46035	0.714692	0.00366032	-0.00224948	8.28166	4.77627	0.522205	0.396444	0.00016661	0.00580244	0.0232021	0.0153187	10.0698
Abl2	41.8066	9.50485	-0.221495	-0.181951	0.118276	0.201295	-0.00777857	-0.00703306	30.8113	12.2532	0.0847287	0.0441235	0.589056	0.77875	0.00590499	0.00218116	6.72206	6.90768	0.0154377	-0.0821946	0.911778	0.554606	0.000449244	-0.00308659	14.5148	7.67448	0.195225	-0.0983697	0.169791	0.492238	0.00679531	-0.00317454	19.9747	9.4453	0.170109	0.0151171	0.227946	0.915291	0.00653617	0.00062637	40.2765	11.6041	0.415555	0.355177	0.00367471	0.0142908	0.0246323	0.0167489	17.3955
Ablim1	5.38857	2.53978	-0.229799	-0.285613	0.10476	0.0421884	-0.00776796	-0.00702245	20.0643	9.89718	0.168788	0.174187	0.279257	0.26394	0.014437	0.0107131	3.55182	3.95852	-0.0957962	-0.179407	0.490779	0.194261	-0.00240999	-0.00594582	4.04412	3.24116	0.0820265	-0.255004	0.567166	0.0709296	0.00238665	-0.00758319	3.61093	4.43111	-0.0996183	-0.184593	0.482276	0.190178	-0.00294229	-0.0088521	6.1339	4.75017	0.201127	-0.0212542	0.175217	0.887235	0.00702749	-0.000855894	5.88148
Ablim2	37.329	15.0918	0.372241	0.38662	0.00714843	0.00507155	0.0234829	0.0242284	47.1507	25.7774	0.360221	0.401363	0.0176543	0.00764055	0.0364402	0.0327164	2.569	3.89273	-0.158519	-0.207761	0.252263	0.131682	-0.00330858	-0.00684441	8.34693	7.35476	0.246933	-0.0291846	0.0806547	0.838904	0.00882056	-0.00114929	7.13443	6.52702	0.243079	0.058927	0.0824914	0.678171	0.00843667	0.00252687	222.121	34.7512	0.424622	0.405755	0.00293123	0.00465987	0.0390032	0.0311199	36.5699
Ablim3	8.01701	5.79414	-0.438826	-0.462153	0.00127632	0.000639899	-0.0218813	-0.0211358	39.2262	31.3647	0.165148	0.142888	0.289907	0.360681	0.015523	0.0117991	4.43719	5.18918	0.0954438	-0.015091	0.492383	0.913752	0.00301414	-0.000521692	5.33636	5.73109	-0.161753	-0.367817	0.256794	0.00792104	-0.00644687	-0.0164167	4.90562	6.15756	-0.40393	-0.41109	0.00298142	0.00246648	-0.0128858	-0.0187956	76.5651	36.498	0.331656	0.291955	0.022764	0.0464515	0.031375	0.0234916	15.4033
Abo
Abr	26.1074	8.52484	-0.234175	-0.247649	0.098133	0.079752	-0.0116362	-0.0108907	18.2538	10.6711	0.000248421	-0.0506838	0.998739	0.74687	2.28645e-05	-0.00370097	3.04392	3.61349	-0.110255	-0.177195	0.427389	0.199907	-0.00309348	-0.00662931	11.1342	6.6579	0.0572554	-0.200666	0.689837	0.157973	0.00242886	-0.00754099	7.6771	6.238	-0.0316243	-0.166496	0.823879	0.238124	-0.00101346	-0.00692327	3.95636	3.93808	-0.0584847	-0.225607	0.696175	0.127317	-0.0019558	-0.00983918	7.86596
Abra									28.0448	26.775	0.395892	0.4365	0.00859199	0.00342999	0.0418635	0.0381397	40.8362	64.3693	0.0240159	-0.00991945	0.863142	0.943247	0.00261028	-0.000925554	118.688	178.027	0.266751	0.202847	0.0584644	0.153409	0.0322225	0.0222526	9.23681	11.8219	0.0399743	-0.0495016	0.778431	0.727467	0.00224642	-0.00366338									213.03
Abracl	10.3172	13.6825	0.0511878	0.0652784	0.721297	0.64903	0.00228727	0.00303279	17.6559	26.4267	-0.0904727	-0.135806	0.563958	0.385214	-0.00973099	-0.0134548	9.23112	29.2857	-0.255581	-0.30458	0.0621398	0.0251347	-0.01115	-0.0146859	5.80182	10.7501	0.0792477	-0.189333	0.580413	0.183301	0.00265475	-0.00731509	7.90253	16.2382	0.0662475	-0.0554676	0.640773	0.696122	0.00272384	-0.00318596	6.94042	9.28009	0.121565	-0.055874	0.415649	0.709126	0.00544688	-0.00243651	6.32455
Abraxas1	10.1804	7.22474	0.109424	0.14512	0.444645	0.309598	0.00408426	0.00482977	19.6545	15.4069	0.0184273	-0.0436614	0.906634	0.78101	0.00141821	-0.00230562	8.37542	11.4827	0.126638	0.0280991	0.361503	0.840156	0.00452858	0.00099275	8.01813	8.18301	0.219978	-0.0766483	0.120882	0.592929	0.00753188	-0.00243797	5.69175	7.74601	0.0185354	-0.146607	0.896232	0.299682	0.000483528	-0.00542628	14.1096	11.6031	0.251556	0.120941	0.0880652	0.418066	0.0135093	0.00562595	7.52365
Abraxas2	8.44849	4.02651	-0.159546	-0.162712	0.263431	0.253948	-0.00499607	-0.00425055	17.2469	8.90652	0.0731812	0.0273827	0.640953	0.861628	0.00501839	0.00129455	4.02353	4.76553	-0.04448	-0.164942	0.749446	0.233303	-0.000889635	-0.00442547	6.43274	5.02076	0.092995	-0.26721	0.516299	0.0580152	0.00250349	-0.00746636	7.2281	6.20389	-0.0228185	-0.185672	0.872434	0.187554	-0.000598508	-0.00650831	5.21882	4.20045	-0.0114748	-0.278794	0.938981	0.0577401	-0.000290643	-0.00817403	5.28826
Abt1	13.4419	8.37428	0.0483215	0.0689595	0.736323	0.630635	0.001827	0.00257251	38.2554	28.0468	-0.0209274	-0.0770937	0.894035	0.623163	-0.00192824	-0.00565207	6.42318	10.9483	0.0138247	-0.0727007	0.920965	0.601371	0.000393781	-0.00314205	8.48071	8.75184	0.168309	-0.146084	0.237756	0.306362	0.00506434	-0.00490551	12.4459	12.8591	-0.165476	-0.24558	0.241052	0.0792872	-0.00580458	-0.0117144	12.7392	9.59924	0.0558083	-0.149043	0.709453	0.317373	0.00217239	-0.005711	9.75657
[truncated: 30,619 more rows]
[truncated: 87 more columns]

## Sheet: 3. Filter 1 Genes
Supplementary Table 3. Genes that passed filter 1 per tissue.
	BAT	Bone	Brain	GAT	Heart	Intestine	Kidney	Liver	Lung	Marrow	MAT	Muscle	Pancreas	SCAT	Skin	Spleen	WBC
0610005C13Rik	FALSE	FALSE	TRUE	TRUE	TRUE	TRUE	TRUE	TRUE	FALSE	TRUE	TRUE	FALSE	FALSE	TRUE	FALSE	FALSE	FALSE
0610006L08Rik	FALSE	FALSE	FALSE	FALSE	FALSE	FALSE	TRUE	FALSE	FALSE	FALSE	FALSE	FALSE	FALSE	FALSE	FALSE	FALSE	FALSE
0610009B22Rik	TRUE	TRUE	TRUE	TRUE	TRUE	TRUE	TRUE	TRUE	TRUE	TRUE	TRUE	TRUE	TRUE	TRUE	TRUE	TRUE	FALSE
0610009E02Rik	FALSE	FALSE	TRUE	TRUE	TRUE	FALSE	TRUE	FALSE	TRUE	FALSE	FALSE	FALSE	FALSE	TRUE	TRUE	FALSE	FALSE
0610009L18Rik	TRUE	TRUE	TRUE	TRUE	TRUE	TRUE	TRUE	FALSE	TRUE	TRUE	TRUE	TRUE	FALSE	TRUE	TRUE	TRUE	TRUE
0610010K14Rik	TRUE	TRUE	TRUE	TRUE	TRUE	TRUE	TRUE	TRUE	TRUE	TRUE	TRUE	TRUE	FALSE	TRUE	TRUE	TRUE	FALSE
0610012G03Rik	TRUE	TRUE	TRUE	TRUE	TRUE	TRUE	TRUE	TRUE	TRUE	TRUE	TRUE	TRUE	TRUE	TRUE	TRUE	TRUE	TRUE
0610025J13Rik	TRUE	FALSE	FALSE	FALSE	TRUE	FALSE	FALSE	FALSE	FALSE	FALSE	FALSE	FALSE	FALSE	FALSE	FALSE	FALSE	FALSE
0610030E20Rik	TRUE	TRUE	TRUE	TRUE	TRUE	TRUE	TRUE	TRUE	TRUE	TRUE	TRUE	TRUE	TRUE	TRUE	TRUE	TRUE	FALSE
0610031O16Rik	FALSE	TRUE	FALSE	FALSE	FALSE	FALSE	TRUE	TRUE	TRUE	FALSE	FALSE	FALSE	FALSE	FALSE	TRUE	FALSE	FALSE
0610033M10Rik	FALSE	FALSE	FALSE	FALSE	FALSE	FALSE	TRUE	FALSE	FALSE	FALSE	FALSE	FALSE	FALSE	FALSE	TRUE	FALSE	FALSE
0610038B21Rik	FALSE	TRUE	TRUE	TRUE	TRUE	FALSE	TRUE	FALSE	TRUE	FALSE	TRUE	TRUE	FALSE	TRUE	TRUE	TRUE	FALSE
0610039K10Rik	FALSE	TRUE	FALSE	FALSE	FALSE	FALSE	FALSE	FALSE	FALSE	TRUE	FALSE	FALSE	FALSE	FALSE	FALSE	TRUE	FALSE
0610040B10Rik	TRUE	TRUE	TRUE	TRUE	TRUE	TRUE	TRUE	TRUE	TRUE	TRUE	TRUE	FALSE	FALSE	TRUE	TRUE	TRUE	FALSE
0610040F04Rik	FALSE	TRUE	TRUE	FALSE	FALSE	FALSE	TRUE	FALSE	FALSE	TRUE	FALSE	FALSE	FALSE	FALSE	FALSE	FALSE	FALSE
0610040J01Rik	FALSE	TRUE	TRUE	TRUE	TRUE	TRUE	TRUE	TRUE	TRUE	TRUE	TRUE	TRUE	TRUE	TRUE	TRUE	TRUE	FALSE
0610043K17Rik	FALSE	TRUE	TRUE	TRUE	FALSE	FALSE	TRUE	TRUE	TRUE	FALSE	TRUE	FALSE	FALSE	TRUE	TRUE	TRUE	FALSE
1010001B22Rik	FALSE	FALSE	FALSE	TRUE	TRUE	FALSE	TRUE	FALSE	FALSE	FALSE	TRUE	FALSE	FALSE	TRUE	FALSE	FALSE	FALSE
1110002E22Rik	FALSE	TRUE	TRUE	FALSE	TRUE	TRUE	FALSE	FALSE	TRUE	TRUE	FALSE	TRUE	FALSE	TRUE	TRUE	TRUE	FALSE
1110002J07Rik	FALSE	FALSE	FALSE	FALSE	FALSE	FALSE	FALSE	FALSE	FALSE	TRUE	FALSE	FALSE	FALSE	TRUE	FALSE	FALSE	FALSE
1110002L01Rik	TRUE	TRUE	TRUE	TRUE	TRUE	TRUE	TRUE	TRUE	TRUE	TRUE	TRUE	TRUE	FALSE	TRUE	TRUE	TRUE	FALSE
1110003F10Rik	FALSE	FALSE	TRUE	FALSE	FALSE	FALSE	FALSE	FALSE	TRUE	TRUE	FALSE	FALSE	FALSE	TRUE	TRUE	TRUE	FALSE
1110004F10Rik	TRUE	TRUE	TRUE	TRUE	TRUE	TRUE	TRUE	TRUE	TRUE	TRUE	TRUE	TRUE	TRUE	TRUE	TRUE	TRUE	TRUE
1110006O24Rik	FALSE	FALSE	FALSE	TRUE	FALSE	FALSE	TRUE	FALSE	FALSE	TRUE	TRUE	FALSE	FALSE	TRUE	FALSE	TRUE	FALSE
1110015O18Rik	FALSE	TRUE	TRUE	FALSE	TRUE	FALSE	FALSE	FALSE	TRUE	FALSE	FALSE	FALSE	FALSE	FALSE	FALSE	FALSE	FALSE
1110017D15Rik	FALSE	FALSE	TRUE	FALSE	FALSE	FALSE	FALSE	FALSE	TRUE	FALSE	FALSE	FALSE	FALSE	FALSE	FALSE	FALSE	FALSE
1110018N20Rik	TRUE	FALSE	TRUE	TRUE	TRUE	FALSE	TRUE	FALSE	TRUE	FALSE	TRUE	TRUE	FALSE	TRUE	FALSE	FALSE	FALSE
1110019B22Rik	FALSE	FALSE	FALSE	FALSE	FALSE	FALSE	TRUE	FALSE	FALSE	FALSE	FALSE	FALSE	TRUE	FALSE	FALSE	FALSE	FALSE
1110019D14Rik	TRUE	TRUE	TRUE	TRUE	TRUE	TRUE	TRUE	TRUE	TRUE	TRUE	TRUE	TRUE	TRUE	TRUE	TRUE	TRUE	FALSE
1110020A21Rik	TRUE	TRUE	FALSE	TRUE	TRUE	TRUE	TRUE	TRUE	FALSE	FALSE	TRUE	TRUE	FALSE	TRUE	TRUE	FALSE	FALSE
1110025M09Rik	FALSE	FALSE	FALSE	TRUE	FALSE	FALSE	FALSE	FALSE	FALSE	TRUE	TRUE	FALSE	FALSE	TRUE	TRUE	FALSE	FALSE
1110028F11Rik	FALSE	FALSE	FALSE	FALSE	FALSE	FALSE	FALSE	TRUE	FALSE	FALSE	FALSE	FALSE	FALSE	FALSE	FALSE	FALSE	TRUE
1110032A03Rik	TRUE	TRUE	TRUE	TRUE	TRUE	TRUE	TRUE	TRUE	TRUE	TRUE	TRUE	TRUE	TRUE	TRUE	TRUE	TRUE	TRUE
1110032F04Rik	FALSE	FALSE	TRUE	FALSE	FALSE	FALSE	TRUE	FALSE	FALSE	FALSE	FALSE	FALSE	FALSE	FALSE	FALSE	TRUE	FALSE
1110038B12Rik	TRUE	TRUE	TRUE	TRUE	TRUE	TRUE	TRUE	TRUE	TRUE	TRUE	TRUE	TRUE	TRUE	TRUE	TRUE	TRUE	FALSE
1110038F14Rik	TRUE	TRUE	TRUE	TRUE	TRUE	TRUE	TRUE	TRUE	TRUE	TRUE	TRUE	TRUE	TRUE	TRUE	TRUE	TRUE	TRUE
1110046J04Rik	FALSE	TRUE	TRUE	TRUE	TRUE	TRUE	FALSE	FALSE	TRUE	TRUE	TRUE	TRUE	FALSE	TRUE	TRUE	TRUE	TRUE
1110051M20Rik	TRUE	TRUE	TRUE	TRUE	TRUE	TRUE	TRUE	TRUE	TRUE	TRUE	TRUE	TRUE	TRUE	TRUE	TRUE	TRUE	FALSE
1110059E24Rik	TRUE	TRUE	TRUE	TRUE	TRUE	TRUE	TRUE	TRUE	TRUE	TRUE	TRUE	TRUE	TRUE	TRUE	TRUE	TRUE	TRUE
1110059G10Rik	TRUE	TRUE	TRUE	TRUE	TRUE	TRUE	TRUE	TRUE	TRUE	TRUE	TRUE	TRUE	FALSE	TRUE	TRUE	TRUE	TRUE
1110065P20Rik	TRUE	TRUE	TRUE	TRUE	TRUE	TRUE	TRUE	TRUE	TRUE	TRUE	TRUE	TRUE	TRUE	TRUE	TRUE	TRUE	FALSE
1190005I06Rik	TRUE	FALSE	TRUE	TRUE	FALSE	FALSE	FALSE	TRUE	FALSE	FALSE	TRUE	FALSE	FALSE	TRUE	TRUE	FALSE	FALSE
1190007I07Rik	TRUE	TRUE	TRUE	TRUE	TRUE	TRUE	TRUE	TRUE	TRUE	TRUE	TRUE	TRUE	TRUE	TRUE	TRUE	TRUE	FALSE
1200007C13Rik	FALSE	FALSE	FALSE	TRUE	FALSE	FALSE	FALSE	FALSE	TRUE	FALSE	FALSE	FALSE	FALSE	FALSE	FALSE	FALSE	TRUE
1300002E11Rik	TRUE	TRUE	TRUE	TRUE	TRUE	TRUE	TRUE	TRUE	TRUE	TRUE	TRUE	TRUE	TRUE	TRUE	TRUE	TRUE	TRUE
1300014J16Rik	TRUE	TRUE	TRUE	TRUE	TRUE	TRUE	TRUE	TRUE	TRUE	TRUE	TRUE	FALSE	FALSE	TRUE	TRUE	TRUE	FALSE
1300017J02Rik	FALSE	TRUE	TRUE	FALSE	TRUE	FALSE	TRUE	TRUE	TRUE	TRUE	TRUE	FALSE	FALSE	TRUE	TRUE	TRUE	TRUE
1500002C15Rik	FALSE	TRUE	TRUE	TRUE	FALSE	TRUE	TRUE	TRUE	TRUE	TRUE	TRUE	FALSE	FALSE	TRUE	TRUE	TRUE	FALSE
1500002F19Rik	FALSE	FALSE	FALSE	FALSE	FALSE	FALSE	TRUE	FALSE	TRUE	FALSE	FALSE	FALSE	FALSE	TRUE	TRUE	FALSE	FALSE
1500004A13Rik	TRUE	TRUE	TRUE	TRUE	TRUE	TRUE	TRUE	TRUE	TRUE	TRUE	TRUE	TRUE	TRUE	TRUE	TRUE	TRUE	FALSE
1500005C15Rik	FALSE	FALSE	FALSE	FALSE	FALSE	FALSE	FALSE	FALSE	TRUE	TRUE	FALSE	FALSE	FALSE	FALSE	FALSE	FALSE	FALSE
1500009C09Rik	FALSE	FALSE	TRUE	FALSE	FALSE	FALSE	FALSE	FALSE	FALSE	FALSE	FALSE	FALSE	FALSE	FALSE	FALSE	FALSE	FALSE
1500009L16Rik	FALSE	TRUE	TRUE	TRUE	TRUE	TRUE	TRUE	FALSE	TRUE	TRUE	TRUE	TRUE	FALSE	TRUE	TRUE	FALSE	FALSE
1500011B03Rik	TRUE	TRUE	TRUE	TRUE	TRUE	TRUE	TRUE	TRUE	TRUE	TRUE	TRUE	TRUE	TRUE	TRUE	TRUE	TRUE	TRUE
1500012K07Rik	FALSE	TRUE	TRUE	FALSE	FALSE	FALSE	FALSE	FALSE	FALSE	TRUE	TRUE	FALSE	FALSE	TRUE	FALSE	FALSE	FALSE
1500015A07Rik	TRUE	TRUE	TRUE	TRUE	TRUE	TRUE	TRUE	TRUE	TRUE	TRUE	TRUE	TRUE	FALSE	TRUE	TRUE	TRUE	FALSE
1500015L24Rik	FALSE	FALSE	TRUE	FALSE	FALSE	FALSE	FALSE	FALSE	FALSE	FALSE	FALSE	FALSE	FALSE	FALSE	FALSE	FALSE	FALSE
1500026H17Rik	TRUE	TRUE	TRUE	FALSE	TRUE	FALSE	TRUE	TRUE	TRUE	FALSE	FALSE	FALSE	FALSE	TRUE	FALSE	FALSE	TRUE
1500035N22Rik	TRUE	TRUE	TRUE	TRUE	FALSE	TRUE	TRUE	TRUE	TRUE	TRUE	TRUE	FALSE	FALSE	TRUE	TRUE	TRUE	FALSE
1520401A03Rik	FALSE	TRUE	FALSE	FALSE	FALSE	FALSE	FALSE	FALSE	FALSE	FALSE	FALSE	FALSE	FALSE	FALSE	FALSE	FALSE	FALSE
1600010M07Rik	FALSE	TRUE	FALSE	FALSE	FALSE	FALSE	FALSE	FALSE	TRUE	TRUE	TRUE	FALSE	FALSE	TRUE	TRUE	TRUE	FALSE
1600012H06Rik	TRUE	TRUE	TRUE	TRUE	TRUE	TRUE	TRUE	TRUE	TRUE	TRUE	TRUE	TRUE	TRUE	TRUE	TRUE	TRUE	TRUE
1600014C10Rik	TRUE	TRUE	TRUE	TRUE	TRUE	TRUE	TRUE	TRUE	TRUE	TRUE	TRUE	TRUE	TRUE	TRUE	TRUE	TRUE	TRUE
1600020E01Rik	TRUE	TRUE	TRUE	TRUE	TRUE	TRUE	TRUE	TRUE	TRUE	TRUE	TRUE	TRUE	TRUE	TRUE	TRUE	TRUE	TRUE
1600023N17Rik	FALSE	FALSE	TRUE	FALSE	FALSE	FALSE	FALSE	FALSE	FALSE	FALSE	FALSE	FALSE	FALSE	FALSE	FALSE	FALSE	FALSE
1600029O15Rik	FALSE	FALSE	TRUE	FALSE	FALSE	FALSE	FALSE	FALSE	FALSE	FALSE	TRUE	FALSE	FALSE	TRUE	FALSE	FALSE	FALSE
1700001C19Rik	FALSE	FALSE	FALSE	FALSE	FALSE	FALSE	FALSE	TRUE	FALSE	FALSE	FALSE	FALSE	FALSE	FALSE	FALSE	FALSE	FALSE
1700001D01Rik	FALSE	FALSE	TRUE	TRUE	TRUE	TRUE	TRUE	FALSE	TRUE	FALSE	TRUE	FALSE	FALSE	TRUE	TRUE	FALSE	FALSE
1700001F09Rik	FALSE	TRUE	FALSE	FALSE	FALSE	FALSE	FALSE	FALSE	FALSE	TRUE	FALSE	FALSE	FALSE	TRUE	FALSE	FALSE	FALSE
1700001G01Rik	FALSE	TRUE	FALSE	FALSE	TRUE	FALSE	FALSE	FALSE	TRUE	TRUE	TRUE	FALSE	FALSE	TRUE	FALSE	FALSE	FALSE
1700001G11Rik	FALSE	FALSE	FALSE	FALSE	FALSE	FALSE	FALSE	FALSE	FALSE	FALSE	TRUE	FALSE	FALSE	FALSE	FALSE	FALSE	FALSE
1700001J11Rik	FALSE	TRUE	FALSE	FALSE	FALSE	FALSE	FALSE	FALSE	FALSE	FALSE	FALSE	FALSE	FALSE	TRUE	FALSE	FALSE	FALSE
1700001K19Rik	FALSE	FALSE	FALSE	FALSE	FALSE	FALSE	FALSE	FALSE	FALSE	FALSE	FALSE	FALSE	FALSE	TRUE	TRUE	FALSE	FALSE
1700001L05Rik	TRUE	TRUE	TRUE	TRUE	TRUE	TRUE	TRUE	TRUE	TRUE	TRUE	TRUE	FALSE	FALSE	TRUE	TRUE	TRUE	FALSE
1700001L19Rik	FALSE	FALSE	TRUE	FALSE	FALSE	FALSE	FALSE	FALSE	TRUE	FALSE	FALSE	FALSE	FALSE	FALSE	FALSE	FALSE	FALSE
1700001O22Rik	FALSE	TRUE	TRUE	TRUE	FALSE	FALSE	TRUE	FALSE	TRUE	FALSE	TRUE	FALSE	TRUE	FALSE	TRUE	FALSE	FALSE
1700003E16Rik	TRUE	FALSE	TRUE	FALSE	TRUE	TRUE	TRUE	TRUE	TRUE	FALSE	TRUE	FALSE	TRUE	FALSE	TRUE	FALSE	FALSE
1700003F12Rik	FALSE	TRUE	TRUE	FALSE	FALSE	FALSE	FALSE	FALSE	FALSE	FALSE	FALSE	FALSE	FALSE	FALSE	FALSE	FALSE	FALSE
1700003G18Rik	FALSE	TRUE	FALSE	FALSE	FALSE	FALSE	TRUE	FALSE	FALSE	TRUE	FALSE	FALSE	FALSE	TRUE	FALSE	FALSE	FALSE
1700003H04Rik	FALSE	TRUE	FALSE	FALSE	TRUE	FALSE	FALSE	FALSE	TRUE	TRUE	FALSE	FALSE	FALSE	FALSE	FALSE	FALSE	FALSE
1700003I16Rik	FALSE	FALSE	FALSE	FALSE	FALSE	FALSE	FALSE	FALSE	FALSE	TRUE	FALSE	FALSE	FALSE	FALSE	FALSE	FALSE	FALSE
1700003L19Rik	FALSE	FALSE	TRUE	FALSE	FALSE	FALSE	FALSE	FALSE	FALSE	TRUE	FALSE	FALSE	FALSE	TRUE	FALSE	FALSE	FALSE
1700003M07Rik	FALSE	FALSE	TRUE	FALSE	FALSE	FALSE	FALSE	FALSE	FALSE	FALSE	FALSE	FALSE	FALSE	FALSE	FALSE	FALSE	FALSE
1700003P14Rik	FALSE	FALSE	FALSE	FALSE	FALSE	FALSE	TRUE	FALSE	FALSE	TRUE	FALSE	FALSE	FALSE	TRUE	FALSE	FALSE	FALSE
1700006A11Rik	FALSE	TRUE	FALSE	FALSE	FALSE	FALSE	FALSE	FALSE	FALSE	TRUE	FALSE	FALSE	FALSE	TRUE	FALSE	FALSE	FALSE
1700006J14Rik	FALSE	TRUE	FALSE	FALSE	FALSE	FALSE	FALSE	FALSE	FALSE	TRUE	FALSE	FALSE	FALSE	TRUE	TRUE	FALSE	TRUE
1700007F19Rik	FALSE	TRUE	TRUE	FALSE	FALSE	FALSE	FALSE	FALSE	FALSE	FALSE	FALSE	FALSE	FALSE	FALSE	FALSE	FALSE	FALSE
1700007J10Rik	FALSE	TRUE	TRUE	TRUE	TRUE	FALSE	TRUE	FALSE	TRUE	FALSE	TRUE	FALSE	FALSE	FALSE	TRUE	TRUE	FALSE
1700007K13Rik	FALSE	FALSE	TRUE	FALSE	FALSE	FALSE	FALSE	FALSE	TRUE	FALSE	FALSE	FALSE	FALSE	FALSE	TRUE	FALSE	FALSE
1700007L15Rik	TRUE	FALSE	FALSE	TRUE	TRUE	TRUE	TRUE	TRUE	FALSE	FALSE	TRUE	FALSE	FALSE	TRUE	FALSE	TRUE	FALSE
1700008H02Rik	FALSE	TRUE	FALSE	FALSE	FALSE	FALSE	FALSE	FALSE	FALSE	TRUE	FALSE	FALSE	FALSE	FALSE	FALSE	FALSE	FALSE
1700008J07Rik	TRUE	TRUE	TRUE	TRUE	TRUE	TRUE	TRUE	TRUE	TRUE	TRUE	TRUE	TRUE	FALSE	TRUE	TRUE	TRUE	FALSE
1700008O03Rik	FALSE	FALSE	TRUE	FALSE	FALSE	FALSE	FALSE	FALSE	FALSE	FALSE	FALSE	FALSE	FALSE	FALSE	TRUE	FALSE	FALSE
1700009C05Rik	FALSE	TRUE	FALSE	FALSE	FALSE	FALSE	FALSE	FALSE	FALSE	FALSE	FALSE	FALSE	FALSE	FALSE	FALSE	FALSE	FALSE
1700009J07Rik	FALSE	FALSE	FALSE	FALSE	FALSE	FALSE	TRUE	FALSE	FALSE	FALSE	FALSE	FALSE	FALSE	FALSE	FALSE	TRUE	FALSE
1700010B13Rik	FALSE	TRUE	FALSE	FALSE	FALSE	FALSE	FALSE	FALSE	FALSE	FALSE	FALSE	FALSE	FALSE	FALSE	FALSE	FALSE	FALSE
1700010H22Rik	FALSE	TRUE	FALSE	FALSE	FALSE	FALSE	FALSE	FALSE	TRUE	FALSE	FALSE	FALSE	FALSE	FALSE	FALSE	FALSE	FALSE
1700010I02Rik	FALSE	TRUE	FALSE	FALSE	FALSE	FALSE	FALSE	FALSE	FALSE	FALSE	FALSE	FALSE	FALSE	FALSE	FALSE	FALSE	FALSE
1700010I14Rik	FALSE	TRUE	TRUE	TRUE	FALSE	FALSE	TRUE	FALSE	TRUE	TRUE	TRUE	FALSE	FALSE	TRUE	FALSE	TRUE	FALSE
1700010J16Rik	FALSE	TRUE	FALSE	FALSE	FALSE	FALSE	FALSE	FALSE	FALSE	TRUE	TRUE	FALSE	FALSE	TRUE	FALSE	FALSE	FALSE
1700010L04Rik	FALSE	TRUE	FALSE	FALSE	FALSE	FALSE	FALSE	FALSE	FALSE	TRUE	FALSE	FALSE	FALSE	FALSE	FALSE	FALSE	FALSE
1700011B04Rik	FALSE	TRUE	FALSE	FALSE	FALSE	FALSE	FALSE	FALSE	TRUE	TRUE	FALSE	FALSE	FALSE	TRUE	FALSE	FALSE	FALSE
1700011L22Rik	FALSE	TRUE	FALSE	FALSE	FALSE	FALSE	FALSE	FALSE	FALSE	FALSE	FALSE	FALSE	FALSE	FALSE	FALSE	FALSE	FALSE
1700012B07Rik	FALSE	TRUE	FALSE	FALSE	FALSE	FALSE	FALSE	FALSE	FALSE	FALSE	FALSE	FALSE	FALSE	FALSE	FALSE	FALSE	FALSE
1700012B09Rik	FALSE	TRUE	TRUE	FALSE	FALSE	FALSE	FALSE	FALSE	TRUE	FALSE	FALSE	FALSE	FALSE	FALSE	FALSE	FALSE	FALSE
1700012D14Rik	TRUE	TRUE	TRUE	TRUE	TRUE	TRUE	TRUE	TRUE	TRUE	TRUE	TRUE	TRUE	FALSE	TRUE	TRUE	TRUE	FALSE
1700012I11Rik	FALSE	TRUE	FALSE	FALSE	FALSE	FALSE	FALSE	FALSE	TRUE	FALSE	FALSE	FALSE	FALSE	FALSE	FALSE	FALSE	FALSE
1700013F07Rik	FALSE	FALSE	TRUE	FALSE	FALSE	FALSE	FALSE	FALSE	TRUE	TRUE	FALSE	FALSE	FALSE	TRUE	FALSE	FALSE	FALSE
1700013M08Rik	FALSE	FALSE	TRUE	FALSE	FALSE	FALSE	FALSE	FALSE	TRUE	TRUE	TRUE	FALSE	FALSE	TRUE	TRUE	TRUE	FALSE
1700015H07Rik	FALSE	FALSE	FALSE	FALSE	FALSE	FALSE	FALSE	FALSE	TRUE	FALSE	FALSE	FALSE	FALSE	FALSE	FALSE	FALSE	FALSE
1700015I17Rik	FALSE	TRUE	FALSE	FALSE	FALSE	FALSE	FALSE	FALSE	FALSE	FALSE	FALSE	FALSE	FALSE	FALSE	FALSE	FALSE	FALSE
1700016C15Rik	FALSE	TRUE	FALSE	FALSE	FALSE	TRUE	TRUE	FALSE	TRUE	TRUE	FALSE	FALSE	FALSE	FALSE	FALSE	FALSE	FALSE
1700016D06Rik	FALSE	FALSE	FALSE	FALSE	FALSE	FALSE	FALSE	FALSE	TRUE	FALSE	FALSE	FALSE	FALSE	TRUE	FALSE	TRUE	FALSE
1700016K05Rik	FALSE	FALSE	FALSE	FALSE	FALSE	FALSE	FALSE	FALSE	TRUE	FALSE	FALSE	FALSE	FALSE	TRUE	FALSE	FALSE	FALSE
1700016K19Rik	FALSE	FALSE	TRUE	FALSE	FALSE	FALSE	FALSE	FALSE	TRUE	FALSE	FALSE	FALSE	FALSE	FALSE	FALSE	FALSE	FALSE
1700016L21Rik	FALSE	TRUE	FALSE	FALSE	FALSE	FALSE	FALSE	FALSE	FALSE	TRUE	FALSE	FALSE	FALSE	FALSE	FALSE	FALSE	FALSE
1700017B05Rik	TRUE	TRUE	TRUE	TRUE	TRUE	TRUE	TRUE	TRUE	TRUE	TRUE	TRUE	TRUE	FALSE	TRUE	TRUE	TRUE	TRUE
1700017N19Rik	FALSE	TRUE	FALSE	FALSE	FALSE	FALSE	FALSE	FALSE	TRUE	TRUE	TRUE	FALSE	FALSE	TRUE	FALSE	FALSE	FALSE
1700018A04Rik	FALSE	TRUE	TRUE	FALSE	FALSE	TRUE	FALSE	FALSE	TRUE	FALSE	TRUE	FALSE	FALSE	FALSE	FALSE	FALSE	FALSE
1700018L02Rik	TRUE	TRUE	TRUE	TRUE	TRUE	TRUE	TRUE	TRUE	TRUE	FALSE	TRUE	TRUE	TRUE	TRUE	TRUE	TRUE	FALSE
1700019D03Rik	FALSE	TRUE	TRUE	TRUE	TRUE	TRUE	TRUE	FALSE	TRUE	TRUE	TRUE	TRUE	TRUE	TRUE	TRUE	TRUE	FALSE
1700019J19Rik	FALSE	TRUE	FALSE	FALSE	FALSE	FALSE	FALSE	FALSE	FALSE	TRUE	FALSE	FALSE	FALSE	FALSE	FALSE	FALSE	FALSE
1700019L13Rik	FALSE	FALSE	FALSE	FALSE	FALSE	FALSE	FALSE	FALSE	FALSE	FALSE	FALSE	FALSE	FALSE	FALSE	TRUE	FALSE	FALSE
1700020L24Rik	TRUE	TRUE	FALSE	TRUE	FALSE	FALSE	FALSE	FALSE	FALSE	TRUE	TRUE	FALSE	FALSE	TRUE	FALSE	FALSE	FALSE
1700022I11Rik	FALSE	TRUE	FALSE	FALSE	FALSE	FALSE	FALSE	FALSE	FALSE	FALSE	FALSE	FALSE	FALSE	TRUE	FALSE	FALSE	FALSE
1700022N22Rik	FALSE	FALSE	FALSE	FALSE	FALSE	FALSE	TRUE	FALSE	FALSE	FALSE	FALSE	FALSE	FALSE	FALSE	FALSE	FALSE	FALSE
1700023F02Rik	FALSE	FALSE	FALSE	FALSE	FALSE	FALSE	FALSE	FALSE	FALSE	FALSE	FALSE	FALSE	FALSE	TRUE	FALSE	FALSE	FALSE
1700023H06Rik	FALSE	TRUE	FALSE	FALSE	FALSE	FALSE	TRUE	TRUE	FALSE	TRUE	TRUE	FALSE	FALSE	FALSE	TRUE	FALSE	FALSE
1700024B18Rik	FALSE	FALSE	FALSE	FALSE	FALSE	FALSE	FALSE	FALSE	FALSE	TRUE	FALSE	FALSE	FALSE	FALSE	FALSE	FALSE	FALSE
1700024G13Rik	FALSE	FALSE	FALSE	FALSE	FALSE	FALSE	FALSE	FALSE	TRUE	FALSE	FALSE	FALSE	FALSE	FALSE	FALSE	FALSE	FALSE
1700025G04Rik	TRUE	TRUE	TRUE	TRUE	TRUE	TRUE	TRUE	TRUE	TRUE	TRUE	TRUE	TRUE	TRUE	TRUE	TRUE	TRUE	FALSE
1700026D11Rik	FALSE	TRUE	FALSE	FALSE	FALSE	FALSE	FALSE	FALSE	TRUE	TRUE	FALSE	FALSE	FALSE	FALSE	FALSE	FALSE	FALSE
1700026F02Rik	FALSE	FALSE	FALSE	FALSE	FALSE	FALSE	FALSE	FALSE	FALSE	TRUE	FALSE	FALSE	FALSE	TRUE	FALSE	FALSE	FALSE
1700026J12Rik	FALSE	TRUE	FALSE	FALSE	FALSE	FALSE	FALSE	FALSE	FALSE	TRUE	FALSE	FALSE	FALSE	FALSE	FALSE	FALSE	FALSE
1700027H10Rik	FALSE	TRUE	TRUE	FALSE	TRUE	FALSE	FALSE	FALSE	FALSE	TRUE	FALSE	FALSE	FALSE	FALSE	FALSE	FALSE	FALSE
1700027J07Rik	FALSE	TRUE	FALSE	FALSE	FALSE	FALSE	FALSE	FALSE	TRUE	TRUE	FALSE	FALSE	FALSE	TRUE	FALSE	TRUE	FALSE
1700028E10Rik	FALSE	TRUE	TRUE	TRUE	TRUE	TRUE	TRUE	TRUE	TRUE	TRUE	TRUE	TRUE	FALSE	TRUE	TRUE	TRUE	FALSE
1700028J19Rik	FALSE	TRUE	TRUE	FALSE	TRUE	TRUE	TRUE	FALSE	TRUE	TRUE	FALSE	FALSE	TRUE	FALSE	TRUE	TRUE	FALSE
1700028K03Rik	FALSE	TRUE	TRUE	TRUE	TRUE	FALSE	FALSE	FALSE	TRUE	TRUE	TRUE	FALSE	FALSE	TRUE	TRUE	TRUE	FALSE
1700028N14Rik	FALSE	TRUE	FALSE	TRUE	FALSE	TRUE	TRUE	FALSE	TRUE	TRUE	TRUE	FALSE	FALSE	TRUE	TRUE	TRUE	FALSE
1700028P14Rik	FALSE	FALSE	TRUE	FALSE	FALSE	FALSE	FALSE	FALSE	TRUE	TRUE	FALSE	FALSE	FALSE	FALSE	FALSE	FALSE	FALSE
1700029H14Rik	FALSE	TRUE	FALSE	FALSE	FALSE	FALSE	FALSE	FALSE	FALSE	FALSE	FALSE	FALSE	FALSE	TRUE	FALSE	FALSE	FALSE
1700029I15Rik	TRUE	TRUE	TRUE	TRUE	TRUE	TRUE	TRUE	TRUE	TRUE	TRUE	TRUE	FALSE	FALSE	TRUE	TRUE	TRUE	FALSE
1700029J07Rik	TRUE	TRUE	TRUE	TRUE	TRUE	TRUE	TRUE	TRUE	TRUE	TRUE	TRUE	TRUE	FALSE	TRUE	TRUE	TRUE	FALSE
1700029N11Rik	FALSE	TRUE	FALSE	FALSE	FALSE	FALSE	FALSE	FALSE	FALSE	TRUE	FALSE	FALSE	FALSE	FALSE	FALSE	FALSE	FALSE
1700030C10Rik	TRUE	TRUE	TRUE	TRUE	TRUE	FALSE	TRUE	TRUE	TRUE	TRUE	TRUE	FALSE	FALSE	TRUE	TRUE	TRUE	FALSE
1700030J22Rik	FALSE	FALSE	TRUE	FALSE	FALSE	FALSE	TRUE	FALSE	TRUE	FALSE	FALSE	FALSE	FALSE	TRUE	FALSE	FALSE	FALSE
1700030K09Rik	TRUE	TRUE	TRUE	TRUE	TRUE	TRUE	TRUE	TRUE	TRUE	TRUE	TRUE	TRUE	TRUE	TRUE	TRUE	TRUE	TRUE
1700030L22Rik	FALSE	FALSE	TRUE	FALSE	FALSE	FALSE	FALSE	FALSE	FALSE	FALSE	FALSE	FALSE	FALSE	FALSE	FALSE	FALSE	FALSE
1700034J05Rik	FALSE	TRUE	TRUE	TRUE	TRUE	FALSE	TRUE	FALSE	TRUE	TRUE	TRUE	FALSE	FALSE	TRUE	TRUE	TRUE	FALSE
1700034K08Rik	FALSE	TRUE	FALSE	FALSE	FALSE	FALSE	FALSE	FALSE	FALSE	FALSE	FALSE	FALSE	FALSE	FALSE	FALSE	FALSE	FALSE
1700034P13Rik	TRUE	TRUE	TRUE	TRUE	FALSE	TRUE	TRUE	TRUE	TRUE	TRUE	TRUE	FALSE	FALSE	TRUE	TRUE	TRUE	FALSE
1700037C18Rik	TRUE	TRUE	TRUE	TRUE	TRUE	TRUE	TRUE	TRUE	TRUE	TRUE	TRUE	TRUE	FALSE	TRUE	TRUE	TRUE	FALSE
1700037H04Rik	TRUE	TRUE	TRUE	TRUE	TRUE	TRUE	TRUE	TRUE	TRUE	TRUE	TRUE	TRUE	TRUE	TRUE	TRUE	TRUE	TRUE
1700040D17Rik	FALSE	FALSE	TRUE	FALSE	FALSE	FALSE	FALSE	FALSE	FALSE	FALSE	FALSE	FALSE	FALSE	FALSE	FALSE	FALSE	FALSE
1700041G16Rik	FALSE	FALSE	FALSE	FALSE	FALSE	FALSE	FALSE	FALSE	FALSE	FALSE	FALSE	FALSE	FALSE	FALSE	FALSE	TRUE	FALSE
1700041M19Rik	FALSE	TRUE	FALSE	FALSE	FALSE	FALSE	FALSE	FALSE	FALSE	FALSE	FALSE	FALSE	FALSE	FALSE	FALSE	FALSE	FALSE
1700042O10Rik	FALSE	FALSE	FALSE	FALSE	FALSE	TRUE	FALSE	FALSE	FALSE	FALSE	FALSE	FALSE	FALSE	FALSE	FALSE	FALSE	FALSE
1700047F07Rik	FALSE	TRUE	TRUE	FALSE	FALSE	FALSE	FALSE	FALSE	FALSE	FALSE	FALSE	FALSE	FALSE	FALSE	FALSE	FALSE	FALSE
1700047G03Rik	FALSE	TRUE	FALSE	TRUE	FALSE	FALSE	FALSE	FALSE	FALSE	FALSE	TRUE	FALSE	FALSE	TRUE	FALSE	FALSE	FALSE
1700047K16Rik	FALSE	TRUE	TRUE	TRUE	FALSE	FALSE	TRUE	FALSE	FALSE	FALSE	FALSE	FALSE	FALSE	TRUE	TRUE	TRUE	FALSE
1700047M11Rik	FALSE	TRUE	TRUE	FALSE	TRUE	FALSE	FALSE	FALSE	TRUE	TRUE	TRUE	FALSE	FALSE	TRUE	TRUE	FALSE	FALSE
1700047N06Rik	FALSE	FALSE	FALSE	FALSE	FALSE	FALSE	FALSE	FALSE	FALSE	FALSE	FALSE	FALSE	FALSE	FALSE	TRUE	FALSE	FALSE
1700048M11Rik	FALSE	FALSE	FALSE	FALSE	FALSE	FALSE	FALSE	FALSE	TRUE	FALSE	FALSE	FALSE	FALSE	FALSE	FALSE	FALSE	FALSE
1700048O20Rik	FALSE	TRUE	TRUE	FALSE	FALSE	FALSE	FALSE	FALSE	TRUE	TRUE	TRUE	FALSE	FALSE	FALSE	TRUE	TRUE	FALSE
1700052H01Rik	FALSE	TRUE	FALSE	FALSE	FALSE	FALSE	FALSE	FALSE	FALSE	FALSE	FALSE	FALSE	FALSE	FALSE	FALSE	FALSE	FALSE
1700052K11Rik	TRUE	TRUE	TRUE	TRUE	TRUE	TRUE	TRUE	TRUE	TRUE	TRUE	TRUE	TRUE	TRUE	TRUE	TRUE	TRUE	FALSE
1700055D18Rik	TRUE	TRUE	TRUE	TRUE	FALSE	TRUE	TRUE	TRUE	TRUE	FALSE	TRUE	FALSE	FALSE	TRUE	TRUE	TRUE	FALSE
1700056E22Rik	TRUE	FALSE	FALSE	TRUE	TRUE	FALSE	FALSE	FALSE	FALSE	FALSE	TRUE	FALSE	FALSE	TRUE	FALSE	FALSE	FALSE
1700056N10Rik	TRUE	TRUE	TRUE	TRUE	TRUE	TRUE	TRUE	FALSE	TRUE	TRUE	TRUE	FALSE	TRUE	TRUE	TRUE	TRUE	FALSE
1700057G04Rik	FALSE	TRUE	FALSE	FALSE	FALSE	FALSE	FALSE	FALSE	TRUE	TRUE	TRUE	FALSE	FALSE	TRUE	FALSE	FALSE	FALSE
1700058P15Rik	FALSE	FALSE	FALSE	FALSE	FALSE	TRUE	FALSE	FALSE	FALSE	TRUE	FALSE	FALSE	FALSE	FALSE	FALSE	TRUE	FALSE
1700060C16Rik	FALSE	TRUE	FALSE	FALSE	FALSE	FALSE	FALSE	FALSE	FALSE	FALSE	FALSE	FALSE	FALSE	FALSE	FALSE	FALSE	FALSE
1700060J05Rik	FALSE	TRUE	FALSE	FALSE	FALSE	FALSE	FALSE	FALSE	FALSE	FALSE	TRUE	FALSE	FALSE	FALSE	TRUE	FALSE	FALSE
1700061F12Rik	FALSE	FALSE	FALSE	FALSE	FALSE	FALSE	FALSE	FALSE	FALSE	TRUE	FALSE	FALSE	FALSE	FALSE	FALSE	FALSE	FALSE
1700061H18Rik	FALSE	FALSE	FALSE	FALSE	FALSE	TRUE	FALSE	FALSE	FALSE	FALSE	FALSE	FALSE	FALSE	FALSE	FALSE	FALSE	FALSE
1700061I17Rik	FALSE	FALSE	FALSE	FALSE	FALSE	FALSE	FALSE	FALSE	FALSE	TRUE	FALSE	FALSE	FALSE	FALSE	FALSE	FALSE	FALSE
1700062C10Rik	FALSE	FALSE	FALSE	FALSE	FALSE	FALSE	FALSE	FALSE	FALSE	FALSE	FALSE	FALSE	FALSE	FALSE	FALSE	TRUE	FALSE
1700063D05Rik	FALSE	FALSE	TRUE	FALSE	FALSE	FALSE	FALSE	FALSE	FALSE	FALSE	FALSE	FALSE	FALSE	FALSE	FALSE	FALSE	FALSE
1700063H04Rik	FALSE	FALSE	FALSE	FALSE	FALSE	FALSE	FALSE	FALSE	FALSE	TRUE	FALSE	FALSE	FALSE	FALSE	FALSE	FALSE	FALSE
1700066B19Rik	TRUE	TRUE	FALSE	TRUE	TRUE	TRUE	FALSE	FALSE	TRUE	FALSE	TRUE	FALSE	FALSE	TRUE	TRUE	TRUE	FALSE
1700066M21Rik	TRUE	TRUE	TRUE	TRUE	TRUE	TRUE	TRUE	TRUE	TRUE	TRUE	TRUE	TRUE	TRUE	TRUE	TRUE	TRUE	FALSE
1700066N21Rik	FALSE	FALSE	FALSE	FALSE	FALSE	FALSE	FALSE	FALSE	TRUE	FALSE	FALSE	FALSE	FALSE	FALSE	FALSE	FALSE	FALSE
1700066O22Rik	FALSE	FALSE	FALSE	FALSE	FALSE	FALSE	FALSE	FALSE	FALSE	FALSE	TRUE	FALSE	FALSE	TRUE	FALSE	FALSE	FALSE
1700067K01Rik	TRUE	TRUE	TRUE	TRUE	TRUE	TRUE	TRUE	TRUE	TRUE	TRUE	TRUE	TRUE	FALSE	TRUE	TRUE	TRUE	FALSE
1700071M16Rik	TRUE	TRUE	TRUE	TRUE	TRUE	TRUE	TRUE	FALSE	TRUE	TRUE	FALSE	FALSE	FALSE	FALSE	FALSE	TRUE	FALSE
1700073E17Rik	FALSE	FALSE	FALSE	FALSE	FALSE	FALSE	FALSE	FALSE	TRUE	FALSE	TRUE	FALSE	FALSE	FALSE	FALSE	FALSE	FALSE
1700080N15Rik	FALSE	FALSE	TRUE	FALSE	FALSE	FALSE	FALSE	FALSE	FALSE	FALSE	FALSE	FALSE	FALSE	FALSE	FALSE	FALSE	FALSE
1700081N11Rik	TRUE	FALSE	FALSE	FALSE	TRUE	FALSE	FALSE	FALSE	FALSE	FALSE	FALSE	FALSE	FALSE	FALSE	FALSE	FALSE	FALSE
1700082M22Rik	FALSE	FALSE	FALSE	FALSE	FALSE	FALSE	FALSE	FALSE	TRUE	FALSE	FALSE	FALSE	FALSE	FALSE	FALSE	FALSE	FALSE
1700084E18Rik	FALSE	FALSE	FALSE	TRUE	FALSE	FALSE	FALSE	FALSE	FALSE	FALSE	FALSE	FALSE	FALSE	TRUE	FALSE	FALSE	FALSE
1700084J12Rik	FALSE	TRUE	FALSE	TRUE	FALSE	TRUE	TRUE	TRUE	TRUE	TRUE	TRUE	FALSE	FALSE	TRUE	TRUE	TRUE	FALSE
1700085C21Rik	FALSE	TRUE	FALSE	FALSE	FALSE	FALSE	FALSE	FALSE	FALSE	FALSE	FALSE	FALSE	FALSE	FALSE	FALSE	FALSE	FALSE
1700085D07Rik	FALSE	FALSE	TRUE	FALSE	FALSE	FALSE	FALSE	FALSE	TRUE	FALSE	TRUE	FALSE	FALSE	TRUE	TRUE	TRUE	FALSE
1700086L19Rik	FALSE	FALSE	TRUE	FALSE	FALSE	FALSE	FALSE	FALSE	FALSE	FALSE	FALSE	FALSE	FALSE	FALSE	FALSE	FALSE	FALSE
1700086O06Rik	TRUE	TRUE	TRUE	TRUE	TRUE	TRUE	TRUE	TRUE	TRUE	TRUE	TRUE	FALSE	TRUE	TRUE	TRUE	TRUE	FALSE
1700087M22Rik	FALSE	FALSE	FALSE	FALSE	FALSE	FALSE	FALSE	FALSE	FALSE	TRUE	FALSE	FALSE	FALSE	FALSE	FALSE	FALSE	FALSE
1700088E04Rik	FALSE	FALSE	TRUE	TRUE	FALSE	FALSE	TRUE	FALSE	TRUE	FALSE	FALSE	FALSE	FALSE	TRUE	TRUE	FALSE	FALSE
1700092E19Rik	FALSE	TRUE	FALSE	FALSE	FALSE	FALSE	FALSE	FALSE	FALSE	FALSE	FALSE	FALSE	FALSE	FALSE	FALSE	FALSE	FALSE
1700093K21Rik	FALSE	TRUE	FALSE	FALSE	FALSE	FALSE	FALSE	FALSE	FALSE	FALSE	FALSE	FALSE	FALSE	FALSE	FALSE	FALSE	FALSE
1700094M23Rik	FALSE	FALSE	FALSE	FALSE	FALSE	FALSE	FALSE	FALSE	TRUE	FALSE	FALSE	FALSE	FALSE	FALSE	FALSE	FALSE	FALSE
1700095A21Rik	FALSE	TRUE	FALSE	FALSE	FALSE	FALSE	FALSE	FALSE	TRUE	TRUE	TRUE	FALSE	FALSE	TRUE	FALSE	FALSE	FALSE
1700095J03Rik	FALSE	FALSE	TRUE	FALSE	FALSE	FALSE	FALSE	FALSE	TRUE	FALSE	TRUE	FALSE	FALSE	FALSE	FALSE	FALSE	FALSE
1700096K18Rik	TRUE	TRUE	TRUE	TRUE	TRUE	TRUE	TRUE	TRUE	TRUE	TRUE	TRUE	TRUE	FALSE	TRUE	TRUE	TRUE	TRUE
1700097N02Rik	FALSE	FALSE	FALSE	FALSE	FALSE	TRUE	FALSE	FALSE	FALSE	TRUE	FALSE	FALSE	FALSE	FALSE	FALSE	FALSE	FALSE
1700101I11Rik	FALSE	FALSE	TRUE	FALSE	TRUE	FALSE	TRUE	FALSE	FALSE	FALSE	FALSE	FALSE	FALSE	FALSE	FALSE	FALSE	FALSE
1700102P08Rik	FALSE	TRUE	TRUE	FALSE	TRUE	FALSE	FALSE	FALSE	TRUE	TRUE	TRUE	FALSE	FALSE	TRUE	TRUE	TRUE	FALSE
1700105P06Rik	FALSE	FALSE	FALSE	FALSE	TRUE	FALSE	FALSE	FALSE	TRUE	FALSE	TRUE	FALSE	FALSE	TRUE	FALSE	FALSE	FALSE
1700109G14Rik	FALSE	FALSE	FALSE	FALSE	FALSE	FALSE	FALSE	FALSE	FALSE	FALSE	TRUE	FALSE	FALSE	TRUE	FALSE	FALSE	FALSE
1700109H08Rik	TRUE	TRUE	TRUE	TRUE	TRUE	TRUE	TRUE	FALSE	TRUE	TRUE	TRUE	TRUE	FALSE	TRUE	TRUE	TRUE	FALSE
1700109K24Rik	TRUE	TRUE	TRUE	TRUE	TRUE	TRUE	TRUE	TRUE	TRUE	TRUE	FALSE	TRUE	FALSE	TRUE	TRUE	FALSE	FALSE
1700110K17Rik	FALSE	FALSE	FALSE	FALSE	FALSE	TRUE	FALSE	FALSE	FALSE	FALSE	FALSE	FALSE	TRUE	FALSE	FALSE	FALSE	FALSE
1700111E14Rik	FALSE	TRUE	FALSE	FALSE	FALSE	FALSE	FALSE	FALSE	FALSE	FALSE	FALSE	FALSE	FALSE	FALSE	FALSE	FALSE	FALSE
1700112D23Rik	FALSE	FALSE	TRUE	FALSE	FALSE	FALSE	FALSE	FALSE	FALSE	FALSE	FALSE	FALSE	FALSE	FALSE	FALSE	FALSE	FALSE
1700112J16Rik	TRUE	FALSE	TRUE	TRUE	FALSE	FALSE	FALSE	FALSE	FALSE	FALSE	TRUE	FALSE	FALSE	TRUE	FALSE	FALSE	FALSE
1700113A16Rik	TRUE	FALSE	TRUE	TRUE	FALSE	TRUE	TRUE	TRUE	FALSE	TRUE	FALSE	FALSE	TRUE	TRUE	TRUE	TRUE	FALSE
1700113H08Rik	FALSE	FALSE	FALSE	FALSE	FALSE	FALSE	FALSE	FALSE	FALSE	FALSE	FALSE	TRUE	FALSE	TRUE	FALSE	FALSE	FALSE
1700119H24Rik	FALSE	FALSE	FALSE	FALSE	FALSE	TRUE	TRUE	FALSE	TRUE	FALSE	TRUE	FALSE	FALSE	FALSE	FALSE	FALSE	FALSE
1700119I11Rik	FALSE	FALSE	FALSE	FALSE	TRUE	FALSE	FALSE	FALSE	FALSE	FALSE	FALSE	FALSE	FALSE	FALSE	FALSE	FALSE	FALSE
1700120C14Rik	TRUE	TRUE	TRUE	TRUE	TRUE	FALSE	TRUE	FALSE	TRUE	TRUE	TRUE	TRUE	FALSE	TRUE	TRUE	TRUE	FALSE
1700120O09Rik	TRUE	FALSE	FALSE	TRUE	FALSE	FALSE	FALSE	FALSE	FALSE	FALSE	TRUE	FALSE	FALSE	TRUE	FALSE	FALSE	FALSE
1700123J17Rik	FALSE	TRUE	FALSE	FALSE	FALSE	FALSE	FALSE	FALSE	FALSE	FALSE	FALSE	FALSE	FALSE	FALSE	FALSE	FALSE	FALSE
1700123M08Rik	FALSE	TRUE	TRUE	TRUE	TRUE	FALSE	FALSE	FALSE	TRUE	FALSE	TRUE	TRUE	FALSE	TRUE	TRUE	FALSE	FALSE
1700123O12Rik	FALSE	TRUE	FALSE	FALSE	FALSE	FALSE	FALSE	FALSE	FALSE	FALSE	FALSE	FALSE	FALSE	FALSE	FALSE	FALSE	FALSE
1700123O20Rik	TRUE	TRUE	TRUE	TRUE	TRUE	TRUE	TRUE	TRUE	TRUE	TRUE	TRUE	TRUE	TRUE	TRUE	TRUE	TRUE	TRUE
1700126G02Rik	FALSE	FALSE	FALSE	FALSE	FALSE	FALSE	FALSE	FALSE	TRUE	FALSE	FALSE	FALSE	FALSE	FALSE	FALSE	FALSE	FALSE
1700128F08Rik	FALSE	FALSE	FALSE	FALSE	FALSE	FALSE	FALSE	FALSE	FALSE	TRUE	FALSE	FALSE	FALSE	FALSE	FALSE	FALSE	FALSE
1700129C05Rik	FALSE	FALSE	FALSE	FALSE	FALSE	FALSE	FALSE	FALSE	FALSE	TRUE	FALSE	FALSE	FALSE	FALSE	FALSE	FALSE	FALSE
1810006J02Rik	FALSE	TRUE	FALSE	FALSE	FALSE	TRUE	FALSE	FALSE	TRUE	TRUE	TRUE	FALSE	FALSE	TRUE	FALSE	TRUE	FALSE
1810007D17Rik	FALSE	FALSE	FALSE	FALSE	FALSE	FALSE	FALSE	FALSE	FALSE	FALSE	FALSE	FALSE	TRUE	FALSE	FALSE	FALSE	FALSE
1810008B01Rik	FALSE	FALSE	FALSE	FALSE	FALSE	FALSE	FALSE	FALSE	FALSE	FALSE	FALSE	FALSE	TRUE	FALSE	FALSE	FALSE	FALSE
1810008I18Rik	FALSE	FALSE	FALSE	FALSE	FALSE	FALSE	FALSE	TRUE	TRUE	FALSE	FALSE	FALSE	TRUE	FALSE	FALSE	FALSE	FALSE
1810009A15Rik	TRUE	TRUE	TRUE	TRUE	TRUE	TRUE	TRUE	TRUE	TRUE	TRUE	TRUE	TRUE	FALSE	TRUE	TRUE	TRUE	FALSE
1810009J06Rik	FALSE	FALSE	FALSE	FALSE	FALSE	FALSE	FALSE	FALSE	FALSE	FALSE	FALSE	FALSE	TRUE	FALSE	FALSE	FALSE	FALSE
1810010H24Rik	TRUE	TRUE	TRUE	TRUE	TRUE	TRUE	TRUE	TRUE	TRUE	FALSE	TRUE	TRUE	TRUE	TRUE	TRUE	TRUE	FALSE
1810010K12Rik	FALSE	FALSE	FALSE	FALSE	FALSE	FALSE	FALSE	FALSE	FALSE	FALSE	FALSE	FALSE	TRUE	FALSE	FALSE	FALSE	FALSE
1810013D15Rik	FALSE	FALSE	FALSE	FALSE	TRUE	FALSE	FALSE	FALSE	FALSE	TRUE	TRUE	FALSE	FALSE	FALSE	FALSE	FALSE	FALSE
1810013L24Rik	TRUE	TRUE	TRUE	TRUE	TRUE	TRUE	TRUE	TRUE	TRUE	TRUE	TRUE	TRUE	TRUE	TRUE	TRUE	TRUE	TRUE
1810014B01Rik	TRUE	TRUE	TRUE	TRUE	TRUE	TRUE	TRUE	TRUE	TRUE	TRUE	TRUE	TRUE	TRUE	TRUE	TRUE	TRUE	FALSE
1810017P11Rik	FALSE	FALSE	FALSE	FALSE	FALSE	TRUE	TRUE	FALSE	FALSE	FALSE	FALSE	FALSE	FALSE	FALSE	FALSE	FALSE	FALSE
[truncated: 26,232 more rows]

## Sheet: 4. Filter 2 Genes
Supplementary Table 4. Genes that passed filter 2 per tissue.
[truncated: 23,680 more rows]

[truncated: 11 more sheets: 5. Filter 3 Genes, 6. Filter 4 Genes, 7. Filter 5 Genes, 8. Filter 6 Genes, 9. Final Genelits, 10. Removed Samples , 11. Samples >5million counts, 12. ValidationDatasets, 14. qPCR-Heart, 15. qPCR-Liver, 17. CGI data]
